# Supplementary material for: Assessing the Influence of Propylthiouracil and Phenytoin on the Metabolomes of the Thyroid, Liver, and Plasma in Rats
Source: MDPI journal article supplement (doi:10.3390/metabo13070847), 2023-07-14
Supplement: s1 [file s1]

## Supplementary Materials:

**Table S1.** Metabolites were detected and quantified in different sample types.

| Metabolites classes                     | Thyroid gland | Liver | Plasma |
|-----------------------------------------|---------------|-------|--------|
| Alkaloids                               |               | 1     |        |
| Amine Oxides                            |               | 1     |        |
| Amino Acids                             | 20            | 19    | 20     |
| Amino Acid Related                      | 18            | 23    | 44     |
| Bile Acids                              | 8             | 11    | 2      |
| Biogenic Amines                         | 6             | 7     | 4      |
| Carbohydrates and Related               | 1             | 1     | 19     |
| Carboxylic Acids                        | 1             | 5     | 1      |
| Cresols                                 | 1             | 1     |        |
| Fatty Acids                             | 7             | 5     | 34     |
| Hormones and Related                    |               |       | 26     |
| Indoles and Derivatives                 | 2             | 4     |        |
| Nucleobases and Related                 | 2             | 2     | 12     |
| Vitamins and Cofactors                  | 1             | 1     | 15     |
| Acylcarnitines                          | 14            | 12    | 14     |
| Lysophosphatidylcholines                | 9             | 10    | 22     |
| Phosphatidylcholines                    | 65            | 48    | 18     |
| Sphingomyelins                          | 15            | 9     | 27     |
| Ceramides                               | 26            | 12    | 13     |
| Dihydroceramides                        | 2             |       |        |
| Hexosylceramides                        | 16            | 3     |        |
| Dihexosylceramides                      | 8             | 1     |        |
| Trihexosylceramides                     | 6             | 1     |        |
| Cholesterol Esters                      | 4             | 2     | 6      |
| Diglycerides                            | 24            | 8     | 1      |
| Triglycerides                           | 234           | 145   | 32     |
| Cholesterol                             |               |       | 1      |
| Complex Lipids, Fatty Acids and Related |               |       | 9      |
| Energy Metabolism and Related           |               |       | 16     |
| Miscellaneous                           |               |       | 12     |
| Lysophosphatidylethanolamine            |               |       | 7      |
| Phosphatidylethanolamine                |               |       | 16     |
| Unknown                                 |               |       | 37     |
| Total                                   | 490           | 332   | 408    |

(a): Effect of Phenytoin with low dose on Thyroid

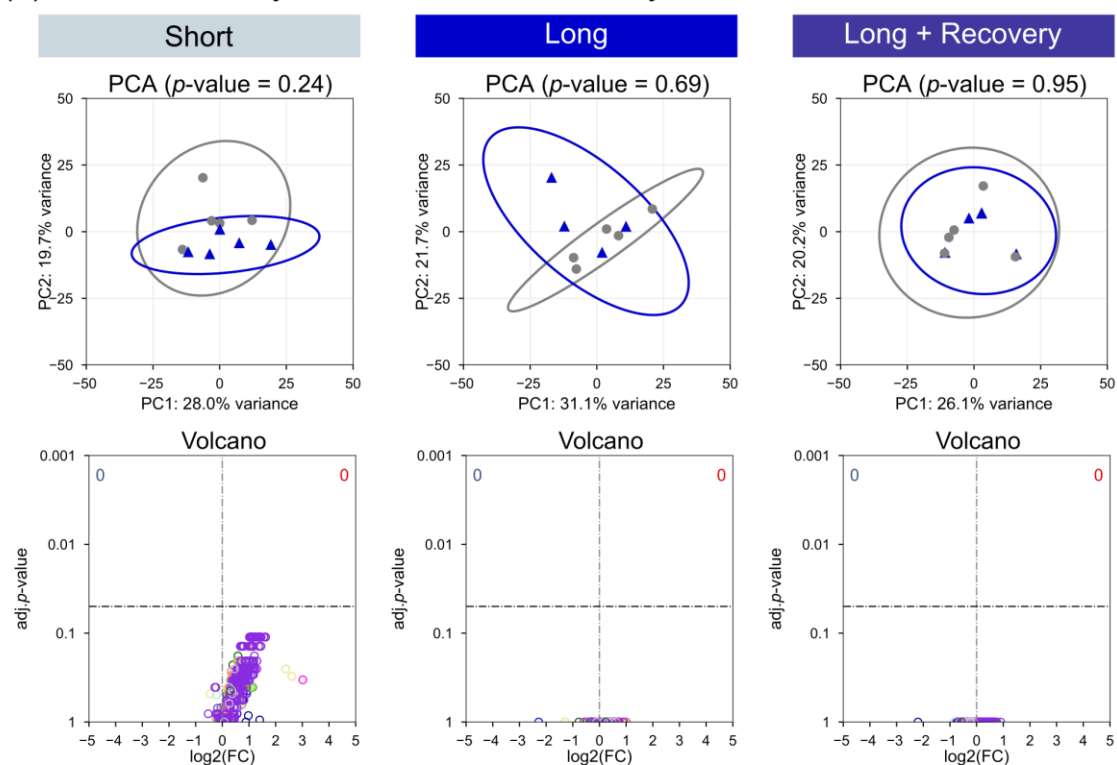

(b): Effect of Phenytoin with high dose on Thyroid

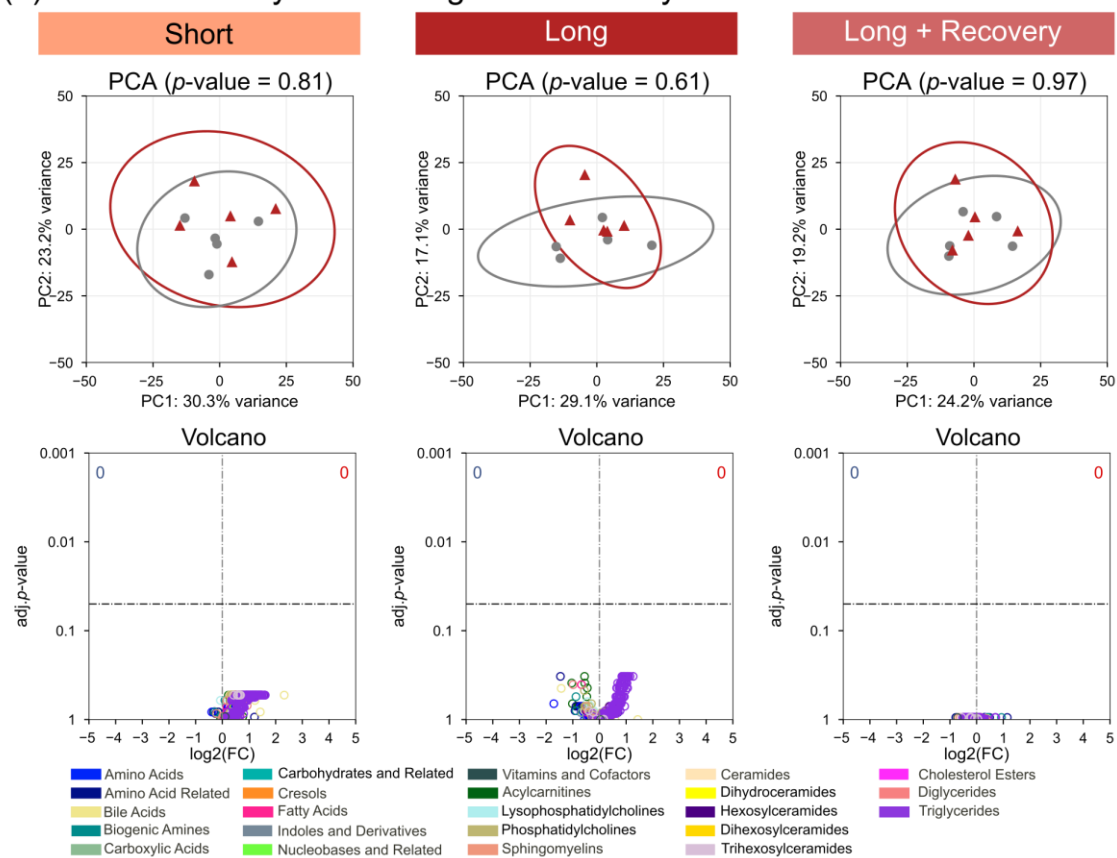

**Figure S1.** Low (a) and high-dose (b) phenytoin-associated changes on the metabolome of the thyroid gland after short-term (2 weeks) and long-term drug administration (4 weeks), as well as an additional 2-week recovery phase after long-term exposure. Differences in global metabolome profiles between treatments (blue and red representing low and high-dose, respectively) to controls (grey) were analyzed by PCA, with their significance determined by PERMANOVA. Differences in metabolite concentrations are visualized in a volcano plot depicting log<sub>2</sub> fold changes of treatment versus control with their significance calculated by the Mann-Whitney U test and P-values corrected for multiple testing using the Benjamini-Hochberg method.

(a): Effect of Phenytoin with low dose on Liver

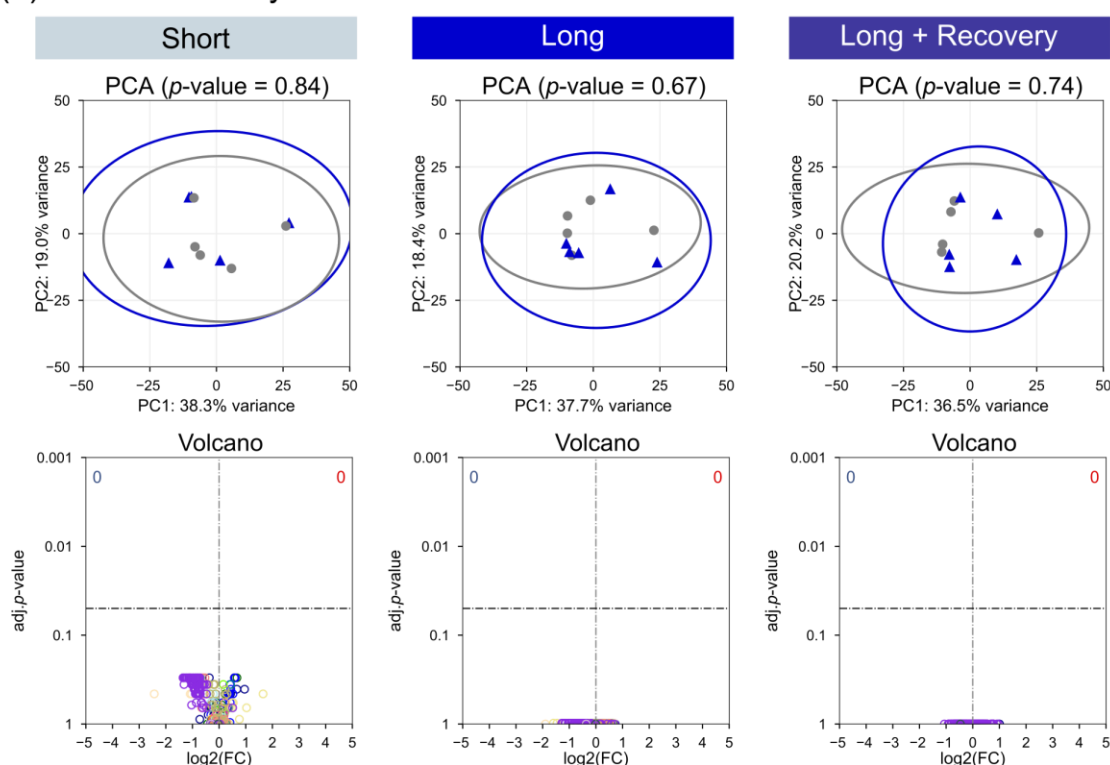

(b): Effect of Phenytoin with high dose on Liver

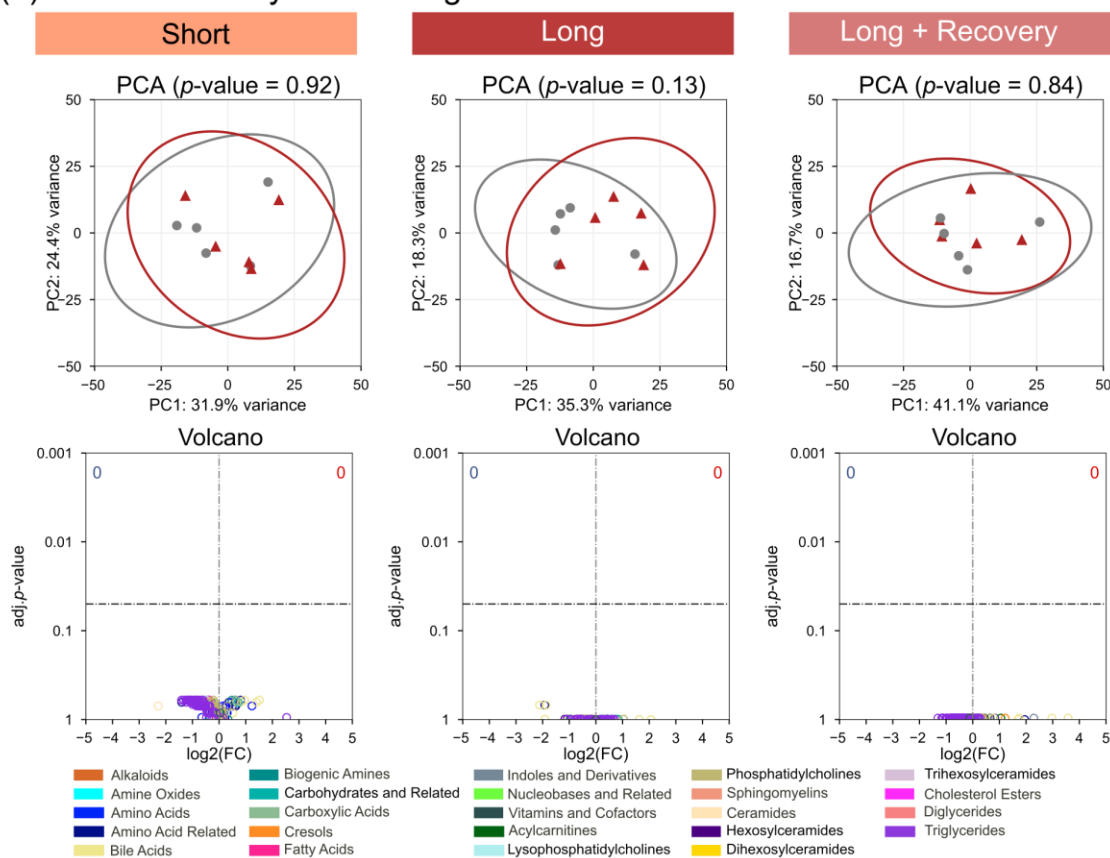

**Figure S2.** Low (a) and high-dose (b) phenytoin-associated changes on the metabolome of the liver after short-term (2 weeks) and long-term drug administration (4 weeks), as well as an additional 2-week recovery phase after long-term exposure. Differences in global metabolome profiles between

treatments (blue and red representing low and high-dose, respectively) to controls (grey) were analyzed by PCA, with their significance determined by PER-MANOVA. Differences in metabolite concentrations are visualized in a volcano plot depicting log<sub>2</sub> fold changes of treatment versus control with their significance calculated by the Mann-Whitney U test and P-values corrected for multiple testing using the Benjamini-Hochberg method.

(a): Effect of Phenytoin with low dose on Plasma

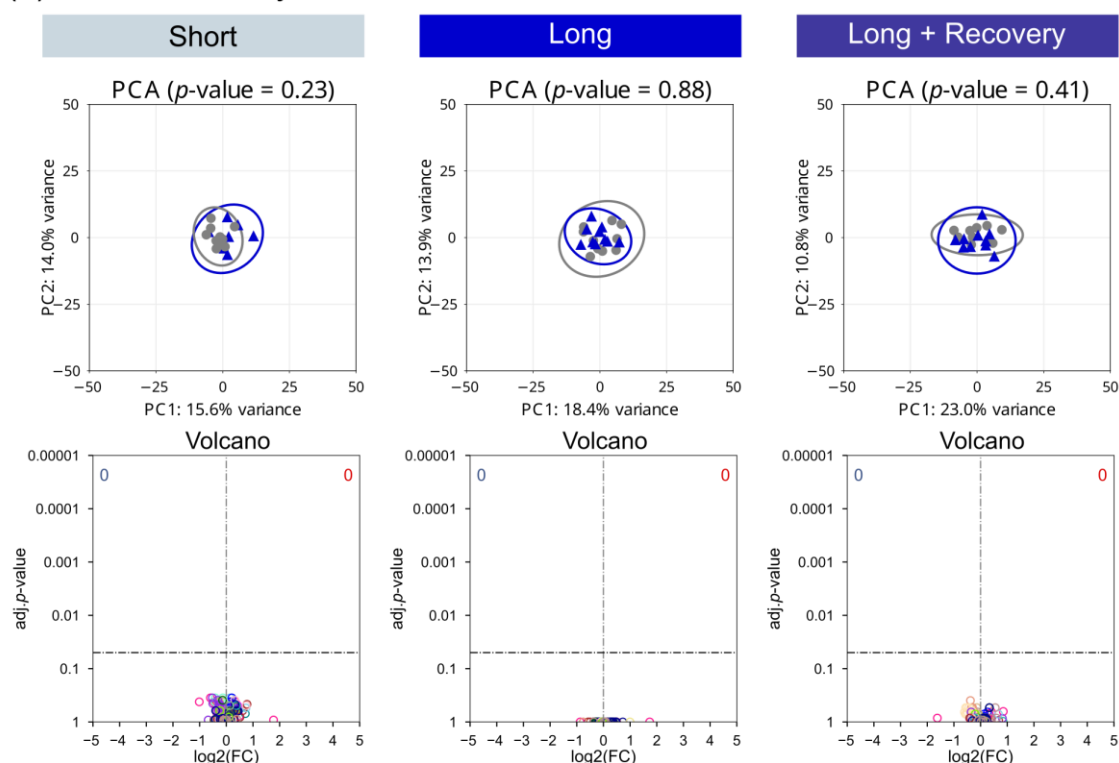

(b): Effect of Phenytoin with high dose on Plasma

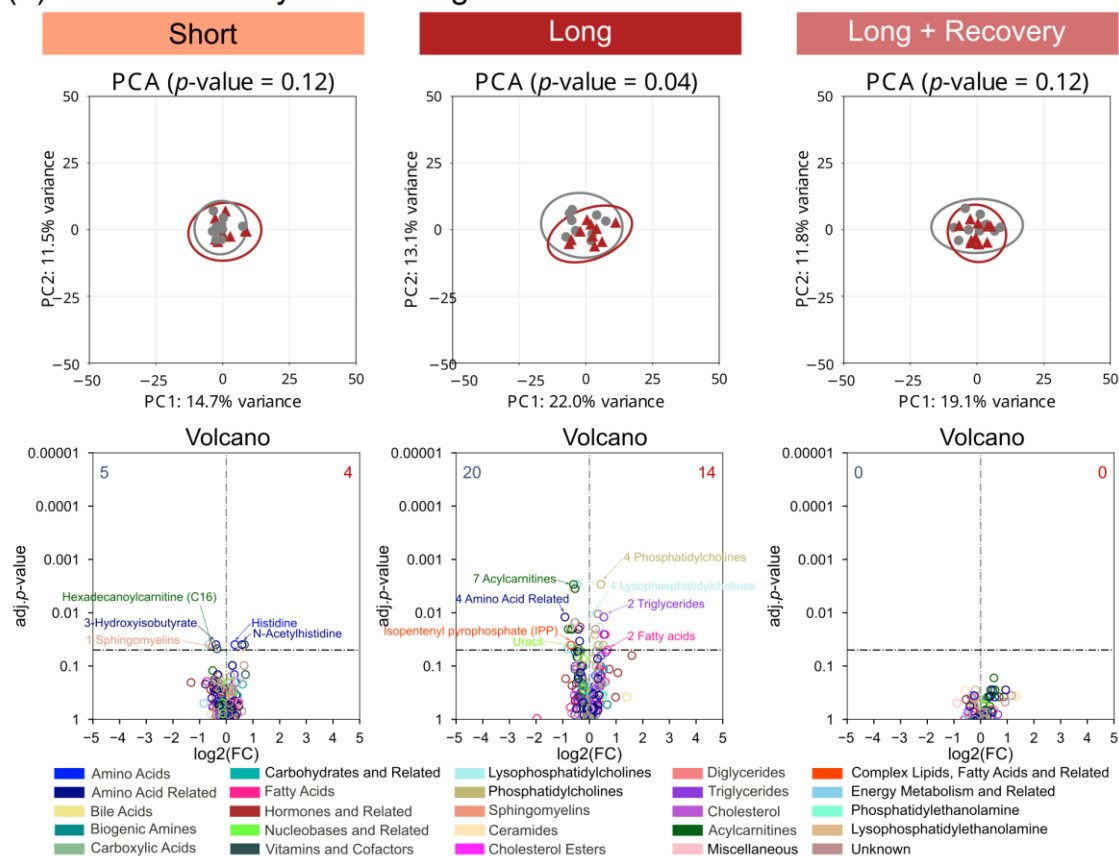

**Figure S3.** Low (a) and high-dose (b) phenytoin-associated changes on the plasma metabolome after short-term (2 weeks) and long-term drug administration (4 weeks), as well as an additional 2-week recovery phase after long-term exposure. Differences in global metabolome profiles between

treatments (blue and red representing low and high-dose, respectively) to controls (grey) were analyzed by PCA, with their significance determined by PERMANOVA. Differences in metabolite concentrations are visualized in a volcano plot depicting log<sub>2</sub> fold changes of treatment versus control with their significance calculated by the Mann-Whitney U test and P-values corrected for multiple testing using the Benjamini-Hochberg method.
