# Supplementary material for: Assessing the Influence of Propylthiouracil and Phenytoin on the Metabolomes of the Thyroid, Liver, and Plasma in Rats
Source: Metabolites. 2023 Jul 14;13(7):847. doi: 10.3390/metabo13070847 (PMC10383188; doi:10.3390/metabo13070847)
Supplement: Supplementary file 1 [file metabolites-13-00847-s001.zip › metabolites-2296454-supplementary.xlsx]

## Sheet: Tissue
Note: Metabolites reliably quantified in thyroid a in liver (: Not Identified metabolites).
ID	Metabolite class	Metabolite name	Thyroid																								Liver
			PTU												Phenytoin												PTU												Phenytoin
			Low dose						High dose						Low dose						High dose						Low dose						High dose						Low dose						High dose
			Short		Long		Long+Recovery		Short		Long		Long+Recovery		Short		Long		Long+Recovery		Short		Long		Long+Recovery		Short		Long		Long+Recovery		Short		Long		Long+Recovery		Short		Long		Long+Recovery		Short		Long		Long+Recovery
			Log2 (FC)	adj.pvalue	Log2 (FC)	adj.pvalue	Log2 (FC)	adj.pvalue	Log2 (FC)	adj.pvalue	Log2 (FC)	adj.pvalue	Log2 (FC)	adj.pvalue	Log2 (FC)	adj.pvalue	Log2 (FC)	adj.pvalue	Log2 (FC)	adj.pvalue	Log2 (FC)	adj.pvalue	Log2 (FC)	adj.pvalue	Log2 (FC)	adj.pvalue	Log2 (FC)	adj.pvalue	Log2 (FC)	adj.pvalue	Log2 (FC)	adj.pvalue	Log2 (FC)	adj.pvalue	Log2 (FC)	adj.pvalue	Log2 (FC)	adj.pvalue	Log2 (FC)	adj.pvalue	Log2 (FC)	adj.pvalue	Log2 (FC)	adj.pvalue	Log2 (FC)	adj.pvalue	Log2 (FC)	adj.pvalue	Log2 (FC)
Amino Acids__Cysteine		Cysteine	1.96858	0.501158	0.673296	0.881429	0.928105	0.94179	4.26411	0.0299716	3.80043	0.11275	1.24261	0.885223	0.912772	0.342687	-0.19141	0.85786	-0.0651788	0.990931	0.493578	0.533592	-0.444834	0.691403	0.32749	0.997673	1.62978	0.746672	-0.113059	0.996956	0.0460838	0.984266	0.291463	0.862606	-0.0825107	0.946675	1.25656	0.521806	0.407844	0.860328	0.493982	0.878674	0.296424	0.997151	1.23323	0.56576	-0.682931	0.984689	-0.447659
Acylcarnitines__Acetylcarnitine (C2)	Acylcarnitines	Acetylcarnitine (C2)	0.206972	0.75808	-0.420562	0.90808	0.391886	0.94179	-0.157227	0.812749	0.108535	0.924028	0.746068	0.895328	0.809081	0.278885	-0.774631	0.85786	0.117683	0.976527	-0.0682862	0.89367	-0.828368	0.514327	0.274829	0.997673	0.12783	0.810215	-0.0220461	0.996956	0.000922145	1	0.233555	0.465838	-0.359081	0.576423	0.111783	0.888214	0.670443	0.280252	0.129761	0.788326	0.307093	0.997151	0.603873	0.522326	0.0641863	0.984689	0.191492
Acylcarnitines__Butyrylcarnitine (C4)	Acylcarnitines	Butyrylcarnitine (C4)	0.256193	0.705186	-0.119184	0.990615	0.375795	0.94179	-0.446886	0.50442	-0.437498	0.335426	0.936382	0.885223	0.789424	0.355724	-0.44534	0.85786	0.298212	0.976527	0.329468	0.626514	-1.0394	0.366117	0.207757	0.997673	-0.249978	0.746672	0.318888	0.996956	0.219394	0.69961	0.125531	0.701463	0.19391	0.691446	0.169925	0.764405	0.169925	0.70069	0.418829	0.725619	-0.00841224	0.997151	0.624491	0.56576	-0.062061	0.984689	0.0953357
Acylcarnitines__Carnitine (C0)	Acylcarnitines	Carnitine (C0)	0.694375	0.572182	0.482343	0.788168	0.10164	0.974836	1.37767	0.038608	1.23913	0.0404619	0.953517	0.885223	0.904589	0.30576	0.1373	0.879596	-0.225742	0.976527	0.203801	0.732748	-0.308448	0.725678	0.041839	0.997673	-0.17035	0.746672	0.056433	0.996956	-0.108208	0.636828	-0.190131	0.370153	-0.453534	0.0291857	-0.102362	0.738122	0.121289	0.650168	0.0710956	0.725619	-0.058482	0.997151	0.0402213	0.878515	-0.194673	0.926983	-0.105902
Acylcarnitines__Glutarylcarnitine (C5-OH); Hydroxyhexanoylcarnitine (C3-DC-M)	Acylcarnitines	Glutarylcarnitine (C5-OH); Hydroxyhexanoylcarnitine (C3-DC-M)	ND	ND	ND	ND	ND	ND	ND	ND	ND	ND	ND	ND	ND	ND	ND	ND	ND	ND	ND	ND	ND	ND	ND	ND	-0.313655	0.746672	-0.0654827	0.996956	0.16303	0.61207	-0.278528	0.415672	-0.533639	0.326292	0.0352339	0.92838	-0.00267272	0.998802	-0.193767	0.725619	-0.0377984	0.997151	-0.0107207	0.972453	-0.263447	0.984689	0.0183318
Acylcarnitines__Hexadecanoylcarnitine (C16)	Acylcarnitines	Hexadecanoylcarnitine (C16)	0.229771	0.671843	0.0579311	0.990615	0.280108	0.94179	-0.388604	0.30072	0.0399927	0.923679	0.442889	0.893472	0.375777	0.25243	-0.0446734	0.915932	-0.122245	0.976527	0.226483	0.528755	-0.550664	0.366117	0.134354	0.997673	-0.102946	0.884346	-0.345955	0.996956	-0.345045	0.50152	-0.400538	0.368396	-0.413594	0.0459558	-0.00166882	0.994851	-0.144076	0.663805	0.0129391	0.971094	-0.0947782	0.997151	-0.172909	0.715497	-0.402098	0.51579	-0.0894448
Acylcarnitines__Hexadecenoylcarnitine (C16:1)	Acylcarnitines	Hexadecenoylcarnitine (C16:1)	ND	ND	ND	ND	ND	ND	ND	ND	ND	ND	ND	ND	ND	ND	-0.0345987	0.915932	ND	ND	ND	ND	ND	ND	ND	ND	ND	ND	ND	ND	ND	ND	ND	ND	ND	ND	ND	ND	ND	ND	ND	ND	ND	ND	ND	ND	ND	ND	ND
Acylcarnitines__Malonylcarnitine (C3-DC); Hydroxybutyrylcarnitine (C4-OH)	Acylcarnitines	Malonylcarnitine (C3-DC); Hydroxybutyrylcarnitine (C4-OH)	-0.0369388	0.956565	0.119806	0.990615	-0.212899	0.965729	-0.231181	0.637511	-0.0790868	0.916018	0.571894	0.893472	0.578316	0.418998	-0.0339989	0.970996	-0.539682	0.976527	-0.158015	0.799746	-0.636828	0.514327	-0.0140069	0.997673	-0.518349	0.746672	-0.239785	0.996956	0.0398215	0.949522	-0.85034	0.211942	-0.912966	0.232511	-0.00846158	0.990479	-0.276456	0.65034	-0.0392169	0.963741	0.147114	0.997151	-0.242658	0.646975	-0.220058	0.984689	1.05368
Acylcarnitines__Octadecadienylcarnitine (C18:2)	Acylcarnitines	Octadecadienylcarnitine (C18:2)	-0.269911	0.671843	-0.122336	0.960768	0.583619	0.94179	-0.584963	0.206754	-0.647894	0.117672	0.461628	0.885223	0.58429	0.107298	-0.0931094	0.85786	-0.126264	0.976527	0.637142	0.435068	-0.55881	0.366117	0.267728	0.997673	-0.182443	0.850776	-0.0251786	0.996956	-0.110597	0.84306	-0.0346894	0.928842	-0.136007	0.742917	0.0428131	0.939593	-0.0899968	0.779086	0.0136632	0.97733	0.250669	0.997151	0.0113802	0.975582	-0.5025	0.979588	0.0533207
Acylcarnitines__Octadecanoylcarnitine (C18)	Acylcarnitines	Octadecanoylcarnitine (C18)	0.444834	0.484629	0.197289	0.881429	0.328546	0.94179	-0.384366	0.118738	-0.195305	0.611122	0.661	0.885223	0.319542	0.250009	0.0873633	0.879596	-0.0766213	0.976527	0.321451	0.458399	-0.474307	0.390433	0	1	ND	ND	ND	ND	-0.0396562	0.906745	ND	ND	-0.0539388	0.793241	0.351535	0.521806	0.225713	0.426886	-0.0267173	0.963705	-0.137504	0.997151	ND	ND	ND	ND	0.0450215
Acylcarnitines__Octadecenoylcarnitine (C18:1)	Acylcarnitines	Octadecenoylcarnitine (C18:1)	0.126336	0.671843	-0.0528633	0.990615	0.300299	0.94179	ND	ND	-0.608046	0.117672	0.454959	0.885223	0.395585	0.144099	-0.142282	0.85786	-0.133325	0.976527	0.67948	0.368018	-0.45581	0.366117	0.0518175	0.997673	ND	ND	ND	ND	ND	ND	ND	ND	ND	ND	ND	ND	ND	ND	ND	ND	ND	ND	ND	ND	ND	ND	ND
Acylcarnitines__Propenoylcarnitine (C3:1)	Acylcarnitines	Propenoylcarnitine (C3:1)	ND	ND	ND	ND	ND	ND	ND	ND	ND	ND	-0.777608	0.895328	ND	ND	ND	ND	ND	ND	ND	ND	ND	ND	ND	ND	ND	ND	ND	ND	0.237039	0.824555	ND	ND	ND	ND	ND	ND	-0.437809	0.779086	0.646984	0.725619	ND	ND	ND	ND	0.426178	0.984689	0.440573
Acylcarnitines__Propionoylcarnitine (C3)	Acylcarnitines	Propionoylcarnitine (C3)	0.612842	0.671843	0.0719498	0.990615	ND	ND	0.821362	0.272364	-0.0489096	0.948002	ND	ND	0.92785	0.366539	-0.0294438	0.965624	ND	ND	0.651437	0.444278	-0.790153	0.466663	ND	ND	-0.669695	0.746672	0.176557	0.996956	0.0358382	0.959853	0.279134	0.600449	0.572107	0.40352	-0.25003	0.700063	0.128406	0.860328	0.102252	0.914215	0.116975	0.997151	-0.0822721	0.921621	-0.378303	0.984689	-0.124177
Acylcarnitines__Tetradecenoylcarnitine (C14:1)	Acylcarnitines	Tetradecenoylcarnitine (C14:1)	ND	ND	ND	ND	ND	ND	ND	ND	ND	ND	ND	ND	0.237864	0.296235	ND	ND	ND	ND	0.283307	0.464641	ND	ND	ND	ND	ND	ND	ND	ND	ND	ND	ND	ND	ND	ND	ND	ND	ND	ND	ND	ND	ND	ND	ND	ND	ND	ND	ND
Acylcarnitines__Valerylcarnitine (C5)	Acylcarnitines	Valerylcarnitine (C5)	1.1609	0.368716	1.43886	0.488966	0.627933	0.94179	0.952521	0.0715047	0.641581	0.152728	0.783968	0.893472	1.13088	0.342687	-0.0601066	0.951292	0.290726	0.976527	0.768584	0.479481	-1.0136	0.390433	0.0315265	0.997673	-0.207828	0.746672	0.113556	0.996956	0.248576	0.50152	-0.111552	0.683278	0.0442428	0.910416	0.139264	0.638943	0.0448376	0.917763	0.213092	0.733695	0.00527494	0.997151	0.257058	0.715497	0.0666603	0.984689	0.254495
Acylcarnitines__Butenylcarnitine (C4:1)	Acylcarnitines	Butenylcarnitine (C4:1)	ND	ND	ND	ND	ND	ND	ND	ND	ND	ND	ND	ND	ND	ND	ND	ND	ND	ND	ND	ND	ND	ND	ND	ND	-0.205087	0.831426	ND	ND	0.0341949	0.974683	-0.0118741	0.980401	ND	ND	ND	ND	0.198546	0.879892	0.15557	0.788326	-0.35559	0.997151	-0.378196	0.67962	0.161967	0.984689	ND
Alkaloids__Trigonelline	Alkaloids	Trigonelline	ND	ND	ND	ND	ND	ND	ND	ND	ND	ND	ND	ND	ND	ND	ND	ND	ND	ND	ND	ND	ND	ND	ND	ND	-0.308472	0.746672	-0.237225	0.996956	0.0868599	0.882825	-0.417958	0.419337	-0.826151	0.181057	0.487095	0.521806	0.27442	0.779086	-0.298443	0.725619	-0.00666706	0.997151	0.105735	0.908731	-0.35587	0.984689	0.295769
Amine Oxides__Trimethylamine N-oxide	Amine Oxides	Trimethylamine N-oxide	ND	ND	ND	ND	ND	ND	ND	ND	ND	ND	ND	ND	ND	ND	ND	ND	ND	ND	ND	ND	ND	ND	ND	ND	0.0412604	0.946199	-0.180935	0.996956	-0.215072	0.672835	0.74505	0.358274	-0.0259979	0.930536	-0.168859	0.764405	0.203757	0.860328	0.0837948	0.917184	0.00247484	0.997151	-0.0699152	0.931573	0.213764	0.984689	0.277434
Amino Acid Related__1-Methylhistidine	Amino Acid Related	1-Methylhistidine	0.165945	0.75808	0.0511727	0.990615	0.22819	0.965729	0.970967	0.076877	1.02322	0.217481	0.572985	0.893472	0.776116	0.326689	-0.0803321	0.921533	-0.059775	0.990931	0.161764	0.787667	-0.677317	0.515994	0.305242	0.997673	-0.485531	0.715796	-0.160224	0.996956	0.145349	0.63951	-0.0686066	0.792531	0.355151	0.374583	0.0782146	0.863156	-0.367676	0.247067	-0.071199	0.875604	0.0155637	0.997151	-0.400608	0.522326	-0.107388	0.984689	0.163456
Amino Acid Related__3-Methylhistidine	Amino Acid Related	3-Methylhistidine	-0.273533	0.746303	-0.297616	0.95764	0.544114	0.94179	-0.0241737	0.964093	1.01169	0.574818	0.440931	0.895328	0.674617	0.342687	0.0863487	0.921533	-0.164333	0.976527	-0.146686	0.805055	-1.46282	0.366117	0.48808	0.997673	-0.626795	0.715796	-0.148492	0.996956	0.23397	0.572238	0.191386	0.573166	0.689495	0.117463	-0.0142778	0.990479	-0.313381	0.461968	-0.130025	0.788326	0.24018	0.997151	-0.32186	0.56576	-0.14674	0.984689	0.0115776
Amino Acid Related__5-Aminovaleric acid	Amino Acid Related	5-Aminovaleric acid	-0.573541	0.671843	-0.18796	0.817167	-0.00686999	0.98947	-0.475454	0.323525	-0.576146	0.117672	-0.246001	0.895328	0.0844463	0.874922	0.127477	0.85786	ND	ND	-0.294346	0.57554	-0.244458	0.588087	-0.183698	0.997673	-2.01316	0.746672	-0.458679	0.996956	1.23882	0.50152	-1.40739	0.419337	-0.227322	0.738224	1.23882	0.521806	-0.723682	0.707084	-0.291517	0.733901	0.113759	0.997151	-1.40315	0.575524	-0.162824	0.984689	0.822446
Amino Acid Related__alpha-Aminoadipic acid	Amino Acid Related	alpha-Aminoadipic acid	ND	ND	ND	ND	ND	ND	ND	ND	ND	ND	ND	ND	ND	ND	ND	ND	ND	ND	ND	ND	ND	ND	ND	ND	-0.300034	0.746672	0.353509	0.996956	0.181137	0.756996	0.127582	0.813559	1.10664	0.188449	-0.151648	0.764405	0.073722	0.933009	0.269874	0.725619	-0.0702827	0.997151	-0.608311	0.56576	0.0660453	0.984689	0.113754
Amino Acid Related__alpha-Aminobutyric acid	Amino Acid Related	alpha-Aminobutyric acid	0.268354	0.75808	0.359808	0.881429	-0.252971	0.94179	0.196118	0.582323	-0.856965	0.167396	0.162425	0.918129	0.55081	0.423372	0.0897188	0.900364	ND	ND	-0.247978	0.539023	-0.595158	0.588087	-0.227129	0.997673	-0.67007	0.715796	-0.512235	0.996956	-0.279862	0.711955	-0.709204	0.211942	-1.33918	0.153239	-0.0840238	0.935562	-0.134878	0.803965	-0.3255	0.725619	-0.343456	0.997151	-0.474467	0.522326	-0.945582	0.909184	-0.219425
Amino Acid Related__Anserine	Amino Acid Related	Anserine	1.48672	0.671843	0.377955	0.990615	0.856853	0.94179	2.11782	0.210206	3.10786	0.310696	0.893504	0.895328	1.401	0.555761	0.671503	0.85786	ND	ND	0.363501	0.698938	-0.33039	0.86028	1.14836	0.997673	0.0238941	0.956565	-0.0839435	0.996956	0.251027	0.50152	0.753409	0.165515	0.479037	0.554848	-0.102447	0.780462	-0.199794	0.759125	-0.401122	0.725619	0.113328	0.997151	-1.07294	0.522326	-1.92004	0.11942	-0.441917
Amino Acid Related__Asymmetric dimethylarginine	Amino Acid Related	Asymmetric dimethylarginine	-0.0319759	0.947824	-0.326818	0.960768	-0.547112	0.94179	-0.0846589	0.856915	-0.538064	0.563769	-0.39821	0.918129	0.330379	0.552301	-0.125635	0.900364	-0.703455	0.976527	0.12532	0.803466	-0.573522	0.658957	-0.472009	0.997673	-0.383595	0.746672	-0.131359	0.996956	-0.16245	0.737445	-0.513219	0.393863	-1.69213	0.0128069	-0.661213	0.521806	0.431534	0.510344	0.241711	0.725619	-0.123777	0.997151	0.223268	0.811053	-0.295828	0.984689	-0.103367
Amino Acid Related__Betaine	Amino Acid Related	Betaine	0.303237	0.680498	0.44389	0.920125	-0.270773	0.965729	0.360977	0.297948	0.201529	0.824438	0.516606	0.895328	0.151472	0.690348	-0.201273	0.85786	-0.187853	0.976527	-0.332045	0.513999	-0.74744	0.514327	0.164197	0.997673	-0.286949	0.746672	0.0129792	0.996956	-0.370378	0.50152	-0.222078	0.537868	-0.778314	0.0672219	0.189465	0.758407	0.578401	0.247579	0.0710528	0.914215	-0.00904514	0.997151	0.363619	0.522326	-0.0634153	0.984689	-0.270596
Amino Acid Related__Citrulline	Amino Acid Related	Citrulline	0.523619	0.511278	0.589523	0.849932	0.108524	0.985243	1.15836	0.0421286	1.286	0.214668	0.297356	0.933799	0.262072	0.741091	-0.431083	0.85786	-0.606281	0.976527	0.0902217	0.894682	-0.879233	0.490577	-0.250575	0.997673	-0.684559	0.746672	-0.06193	0.996956	-0.686212	0.50152	-0.151762	0.722359	0.460142	0.576423	-0.757325	0.521806	0.307268	0.698927	-0.189262	0.812123	-0.684358	0.997151	-0.266468	0.715497	-0.309105	0.984689	-0.563901
Amino Acid Related__Cystine	Amino Acid Related	Cystine	-0.480305	0.671843	-0.708627	0.663675	0.23416	0.971512	0.40439	0.499499	-0.953264	0.160691	-0.0480529	0.979948	0.746604	0.176138	0.488461	0.85786	-0.234393	0.976527	0.53544	0.53991	-0.0851077	0.921922	0.304576	0.997673	0.314456	0.746672	-0.121092	0.996956	-0.246005	0.630491	-0.091336	0.747326	-0.139155	0.829671	0.211261	0.730606	0.172289	0.76643	0.318991	0.743609	-0.0713264	0.997151	0.25937	0.56576	-0.047856	0.984689	-0.0636134
Amino Acid Related__Homoarginine	Amino Acid Related	Homoarginine	0.537687	0.671843	0.045349	0.990615	0.17585	0.974836	0.823711	0.152107	0.0359196	0.962645	0.0737779	0.973119	0.631613	0.369762	-0.190914	0.85786	-0.168256	0.976527	0.0674836	0.851293	-0.3189	0.725678	-0.0887621	0.997673	-0.180489	0.746672	0.152296	0.996956	0.0751975	0.895729	-0.0847623	0.813559	-0.450792	0.565985	-0.0449555	0.965624	-0.278959	0.551394	0.0126382	0.97733	-0.319151	0.997151	-0.42447	0.522973	0.0548455	0.984689	-0.501467
Amino Acid Related__Homocysteine	Amino Acid Related	Homocysteine	1.62718	0.671843	ND	ND	ND	ND	2.59097	0.186359	ND	ND	ND	ND	0.883075	0.501396	ND	ND	ND	ND	0.473051	0.435323	ND	ND	ND	ND	0.323344	0.854838	-0.36694	0.996956	0.591042	0.50152	0.190816	0.906399	0.865129	0.71876	0.902575	0.636914	-0.189138	0.923406	0.723186	0.820015	1.00608	0.997151	0.598783	0.715497	0.426839	0.984689	0.0817438
Amino Acid Related__Methionine sulfoxide	Amino Acid Related	Methionine sulfoxide	-0.481969	0.671843	-1.02963	0.634161	-0.524228	0.94179	-0.875182	0.051335	-1.69564	0.152728	-0.260904	0.933799	0.805216	0.355724	-0.348605	0.85786	-0.257879	0.976527	0.763711	0.490932	-0.561693	0.671562	-0.088246	0.997673	-0.574578	0.746672	-0.428307	0.996956	-0.11008	0.882825	-0.498756	0.358274	-1.10784	0.0291857	-0.441736	0.543304	0.955738	0.337813	0.0847841	0.914215	-0.155425	0.997151	0.505795	0.56576	-0.0838441	0.984689	0.161716
Amino Acid Related__Ornithine	Amino Acid Related	Ornithine	0.533903	0.745149	-0.826639	0.960768	-2.18282	0.94179	0.079496	0.944779	-1.59371	0.488162	-1.64283	0.895328	0.217106	0.846886	-0.491426	0.85786	-2.1983	0.976527	1.2055	0.60499	-0.326782	0.918523	ND	ND	-0.270289	0.746672	-0.215928	0.996956	-0.269949	0.50152	-0.471026	0.358274	-0.656779	0.105571	-0.162847	0.527614	0.382533	0.411771	0.191651	0.725619	-0.0111785	0.997151	0.305117	0.575524	0.265535	0.984689	-0.105621
Amino Acid Related__Phenylacetylglycine	Amino Acid Related	Phenylacetylglycine	ND	ND	0.558327	0.960768	ND	ND	0.15313	0.88711	1.11005	0.581212	ND	ND	0.448461	0.658217	ND	ND	ND	ND	ND	ND	0.695016	0.611947	ND	ND	-0.200396	0.810215	0.0987782	0.996956	0.229029	0.716464	0.300621	0.539359	0.275545	0.576423	0.0362983	0.965624	-0.0228155	0.969139	-0.273191	0.728094	0.146672	0.997151	-0.218801	0.734582	0.113808	0.984689	1.94714
Amino Acid Related__Symmetric dimethylarginine	Amino Acid Related	Symmetric dimethylarginine	-0.288841	0.671843	-0.731625	0.7372	-0.69482	0.94179	-0.393879	0.326622	-0.717533	0.377016	-0.599289	0.895328	0.232065	0.552301	-0.186353	0.85786	-0.740772	0.976527	0.0267265	0.950147	-0.502584	0.613246	-0.78136	0.997673	-0.505133	0.746672	-0.268362	0.996956	-0.171581	0.684652	-0.44565	0.40164	-0.889811	0.00518971	-0.270426	0.581791	0.665493	0.372968	0.0674456	0.90404	-0.0380776	0.997151	0.138832	0.866263	-0.01856	0.984689	-0.257961
Amino Acid Related__Taurine	Amino Acid Related	Taurine	0.738535	0.519563	0.485613	0.842007	0.172663	0.972366	1.57378	0.0299716	1.71324	0.0891661	1.18084	0.885223	1.12878	0.296235	-0.0897642	0.944283	-0.155776	0.976527	0.305785	0.733016	-0.474159	0.708541	0.157818	0.997673	ND	ND	ND	ND	ND	ND	ND	ND	ND	ND	ND	ND	ND	ND	ND	ND	ND	ND	ND	ND	-0.291377	0.984689	ND
Amino Acid Related__trans-4-Hydroxyproline	Amino Acid Related	trans-4-Hydroxyproline	0.813873	0.427202	0.344577	0.930174	0.327876	0.965729	1.15317	0.0616163	1.17915	0.117672	0.922566	0.885223	0.975546	0.402259	-0.319432	0.85786	-0.287235	0.976527	0.236592	0.803466	-0.916062	0.540563	-0.0409031	0.997673	-0.188662	0.746672	0.0303736	0.996956	0.171194	0.554678	-0.699998	0.111514	-0.491294	0.109345	0.222596	0.521806	-0.0703733	0.869506	-0.408232	0.725619	-0.123714	0.997151	-0.0730718	0.741665	-0.396213	0.583241	0.146242
Amino Acid Related__beta-Aminobutyric acid	Amino Acid Related	beta-Aminobutyric acid	ND	ND	ND	ND	ND	ND	ND	ND	ND	ND	ND	ND	ND	ND	ND	ND	ND	ND	ND	ND	ND	ND	ND	ND	-0.184518	0.746672	-0.480822	0.996956	0.0528519	0.899825	-0.690081	0.099884	-0.454378	0.576423	0.389825	0.521806	-0.198647	0.558355	-0.323335	0.733901	0.354172	0.997151	-0.29655	0.534988	-0.382962	0.984689	0.151695
Amino Acid Related__Creatinine	Amino Acid Related	Creatinine	ND	ND	ND	ND	ND	ND	ND	ND	ND	ND	ND	ND	ND	ND	ND	ND	ND	ND	ND	ND	ND	ND	ND	ND	ND	ND	ND	ND	-0.0251968	0.906745	0.0496804	0.813559	0.323634	0.576423	ND	ND	-0.0196229	0.950413	-0.199106	0.725619	ND	ND	ND	ND	-0.282433	0.568671	0.650216
Amino Acid Related__Kynurenine	Amino Acid Related	Kynurenine	ND	ND	ND	ND	ND	ND	ND	ND	ND	ND	ND	ND	ND	ND	ND	ND	ND	ND	ND	ND	ND	ND	ND	ND	-0.0913438	0.891328	0.0112345	0.996956	0.615121	0.503736	-0.184641	0.737062	-0.308248	0.646463	0.0195069	0.990479	-0.409043	0.427581	0.0839756	0.931523	0.283414	0.997151	0.806598	0.522326	0.578368	0.984689	-0.0165491
Amino Acid Related__Proline betaine	Amino Acid Related	Proline betaine	ND	ND	ND	ND	ND	ND	ND	ND	ND	ND	ND	ND	ND	ND	ND	ND	ND	ND	ND	ND	ND	ND	ND	ND	-0.313785	0.75889	-0.12353	0.996956	-0.110937	0.906745	-0.480222	0.394881	-0.820724	0.449694	0.908215	0.521806	0.574938	0.337813	-0.209525	0.869353	-0.190193	0.997151	0.149874	0.823412	0.225928	0.984689	-0.0306388
Amino Acid Related__Sarcosine	Amino Acid Related	Sarcosine	ND	ND	ND	ND	ND	ND	ND	ND	ND	ND	ND	ND	ND	ND	ND	ND	ND	ND	ND	ND	ND	ND	ND	ND	-0.127418	0.869811	0.0540707	0.996956	0.375433	0.518407	0.748126	0.358274	0.75109	0.269827	-0.455776	0.521806	-0.315143	0.58875	0.0278762	0.969377	0.0756889	0.997151	0.628113	0.579398	-0.211851	0.984689	-0.430512
Amino Acids__Alanine	Amino Acids	Alanine	0.475588	0.671843	0.0485435	0.990615	-0.0332731	0.985243	0.800359	0.0932218	0.490217	0.421787	0.191121	0.939868	0.778535	0.342687	-0.165633	0.874385	-0.418799	0.976527	0.312075	0.635976	-0.387926	0.725678	-0.176679	0.997673	-0.0786688	0.81536	-0.152191	0.996956	0.0210616	0.952546	-0.219751	0.431639	-0.25081	0.576423	-0.0628249	0.865026	0.1542	0.707084	0.0978303	0.787449	0.171483	0.997151	0.304361	0.600229	0.167313	0.984689	0.0195791
Amino Acids__Arginine	Amino Acids	Arginine	0.0903667	0.846702	-0.380763	0.881429	0.0531466	0.985243	0.0878653	0.843977	-0.280007	0.705334	0.269954	0.933799	0.492433	0.452022	-0.410425	0.85786	-0.328283	0.976527	0.177199	0.787667	-0.699034	0.548028	-0.0539976	0.997673	ND	ND	ND	ND	ND	ND	ND	ND	ND	ND	ND	ND	ND	ND	ND	ND	ND	ND	ND	ND	ND	ND	ND
Amino Acids__Asparagine	Amino Acids	Asparagine	0.778593	0.651211	-0.224856	0.990615	-0.113928	0.985243	1.00569	0.0687083	0.415741	0.705929	0.290305	0.939868	0.940177	0.356262	-0.399413	0.85786	-0.44724	0.976527	0.529637	0.479481	-0.5654	0.735063	-0.207352	0.997673	0.274747	0.746672	0.0924209	0.996956	-0.0900414	0.837462	-0.211591	0.675048	-0.546119	0.576423	-0.0256866	0.984524	0.0337807	0.930415	0.446357	0.725619	0.0755758	0.997151	0.705646	0.522326	0.43588	0.979588	-0.214634
Amino Acids__Aspartate	Amino Acids	Aspartate	0.200066	0.922742	-1.46802	0.800853	-1.78676	0.94179	1.64039	0.506971	-0.4609	0.788628	-1.61439	0.895328	-0.0931758	0.956427	-2.27884	0.85786	-0.221231	0.990931	-0.396348	0.812963	-1.7129	0.588087	0.202032	0.997673	-0.668433	0.848118	-0.50557	0.996956	-0.243748	0.913177	-0.14048	0.94251	-0.59644	0.812237	-0.205134	0.944758	-0.15642	0.958035	-0.281	0.945149	-0.517518	0.997151	-0.649419	0.815781	-0.811711	0.984689	-0.24888
Amino Acids__Cysteine	Amino Acids	Cysteine	1.96858	0.501158	0.673296	0.881429	0.928105	0.94179	4.26411	0.0299716	3.80043	0.11275	1.24261	0.885223	0.912772	0.342687	-0.19141	0.85786	-0.0651788	0.990931	0.493578	0.533592	-0.444834	0.691403	0.32749	0.997673	1.62978	0.746672	-0.113059	0.996956	0.0460838	0.984266	0.291463	0.862606	-0.0825107	0.946675	1.25656	0.521806	0.407844	0.860328	0.493982	0.878674	0.296424	0.997151	1.23323	0.56576	-0.682931	0.984689	-0.447659
Amino Acids__Glutamate	Amino Acids	Glutamate	1.25596	0.467677	0.772474	0.665588	0.927864	0.94179	2.32565	0.0655066	2.12743	0.0346772	1.06271	0.885223	0.554618	0.543086	-0.41377	0.85786	0.282897	0.976527	0.455362	0.567355	0.109833	0.922757	0.39582	0.997673	0.630964	0.746672	0.334588	0.996956	0.301687	0.58442	0.800036	0.411471	1.1182	0.261227	0.484105	0.559176	-0.310756	0.869506	-0.205276	0.749449	0.188539	0.997151	0.20437	0.877685	0.303966	0.984689	0.23394
Amino Acids__Glutamine	Amino Acids	Glutamine	0.237493	0.674056	-0.141465	0.990615	-0.124015	0.984885	0.764525	0.122936	0.208551	0.81454	0.340235	0.918129	0.730158	0.351072	-0.284519	0.85786	-0.37668	0.976527	0.23315	0.732748	-0.693733	0.588087	-0.0984888	0.997673	-0.429712	0.746672	-0.595189	0.996956	0.0510667	0.840176	-0.588607	0.358274	-1.05547	0.00584223	0.0435461	0.942919	0.00037647	0.998802	0.168498	0.766119	0.112259	0.997151	-0.136537	0.805697	-0.237141	0.979588	-0.119108
Amino Acids__Glycine	Amino Acids	Glycine	0.778367	0.484629	0.181143	0.985602	0.0118231	0.98947	0.884337	0.0584878	0.483762	0.312566	0.643675	0.893472	0.813156	0.296235	-0.273949	0.85786	-0.347307	0.976527	0.0322708	0.953512	-0.553085	0.588745	-0.00452966	0.997673	-0.363771	0.0222116	-0.283964	0.996956	-0.0713788	0.837849	-0.558776	0.111514	-0.621858	0.0554843	0.114996	0.723245	0.12376	0.487225	0.0662131	0.788326	0.0618378	0.997151	0.0796336	0.805697	0.0395244	0.984689	-0.034731
Amino Acids__Histidine	Amino Acids	Histidine	0.252771	0.687127	-0.316896	0.960768	-0.196895	0.974836	0.39318	0.28584	-0.0240915	0.975043	0.049463	0.979948	0.682929	0.355724	-0.165166	0.874427	-0.375194	0.976527	0.360917	0.592274	-0.460912	0.691403	-0.181533	0.997673	-0.138045	0.746672	-0.0490327	0.996956	-0.136246	0.50152	-0.12422	0.49937	-0.27775	0.181057	-0.0360958	0.764405	0.132577	0.680952	0.028289	0.914215	-0.0512253	0.997151	0.149747	0.669757	0.0731075	0.984689	-0.0873056
Amino Acids__Isoleucine	Amino Acids	Isoleucine	0.0957652	0.835847	-0.248326	0.985602	-0.158228	0.980376	0.00871519	0.974525	-0.277357	0.77331	0.189917	0.955262	0.567032	0.354742	-0.302386	0.85786	-0.369382	0.976527	0.129811	0.80133	-0.550416	0.67394	-0.214157	0.997673	-0.140779	0.746672	-0.223939	0.996956	-0.21506	0.50152	-0.241603	0.389274	-0.625611	0.00880142	-0.300287	0.140867	0.371351	0.380049	0.086553	0.769659	-0.0480465	0.997151	0.277723	0.56576	0.0203133	0.984689	-0.17146
Amino Acids__Leucine	Amino Acids	Leucine	0.188617	0.704085	-0.268549	0.960768	-0.138278	0.980376	0.179851	0.570467		0.894876	0.102924	0.973119	0.691987	0.342687	-0.21636	0.85786	-0.43281	0.976527	0.216316	0.698938	-0.440529	0.691403	-0.193173	0.997673	-0.156499	0.746672	-0.18502	0.996956	-0.150707	0.50152	-0.292215	0.358274	-0.705637	0.0118842	-0.259151	0.0833338	0.386958	0.380049	0.189091	0.725619	0.0177779	0.997151	0.277534	0.611781	0.115897	0.984689	-0.179484
Amino Acids__Lysine	Amino Acids	Lysine	0.196282	0.704085	-0.272789	0.972936	-0.172598	0.974836	0.0512037	0.890627	-0.352213	0.705929	0.0498964	0.980492	0.518291	0.351072	-0.227832	0.85786	-0.420973	0.976527	0.152152	0.7563	-0.501258	0.691403	-0.322722	0.997673	-0.200533	0.746672	-0.177787	0.996956	-0.404341	0.50152	-0.409542	0.358274	-0.631382	0.0146321	-0.301527	0.521806	0.09586	0.809695	-0.0731874	0.8125	-0.413927	0.997151	0.110385	0.791343	0.0683533	0.984689	-0.418373
Amino Acids__Methionine	Amino Acids	Methionine	0.33157	0.671843	-0.298955	0.960768	-0.237538	0.972143	0.230343	0.471359	-0.186629	0.836278	-0.0101462	0.999071	0.687864	0.305202	-0.158714	0.879596	-0.549422	0.976527	0.349019	0.539023	-0.385538	0.726623	-0.217807	0.997673	-0.274228	0.746672	-0.169037	0.996956	-0.351396	0.50152	-0.395969	0.358274	-0.844713	0.00584223	-0.334515	0.521806	0.416831	0.380049	0.0883251	0.788326	-0.153384	0.997151	0.204851	0.715497	-0.0165341	0.984689	-0.248732
Amino Acids__Phenylalanine	Amino Acids	Phenylalanine	0.137923	0.753096	-0.253706	0.960768	-0.199964	0.972143	-0.0505195	0.891279	-0.2872	0.697153	0.221831	0.938311	0.649855	0.322372	-0.136165	0.879596	-0.360929	0.976527	0.210406	0.659161	-0.476837	0.669684	-0.115477	0.997673	-0.252947	0.746672	-0.157939	0.996956	-0.188514	0.50152	-0.51392	0.358274	-0.973365	0.0262335	-0.29159	0.521806	0.409107	0.337813	0.253918	0.725619	-0.0828129	0.997151	0.235118	0.683114	0.215062	0.984689	-0.183428
Amino Acids__Proline	Amino Acids	Proline	0.143963	0.75808	-0.137526	0.990615	-0.0781424	0.985243	0.378066	0.284454	0.135914	0.903847	0.0556662	0.979948	0.608597	0.4036	-0.2394	0.85786	-0.462836	0.976527	0.246052	0.715671	-0.534454	0.683084	-0.240642	0.997673	-0.344234	0.746672	-0.314873	0.996956	-0.204633	0.50152	-0.473085	0.358274	-0.914735	0.00584223	-0.31295	0.521806	0.336944	0.510344	0.0431935	0.914215	-0.0217285	0.997151	0.150769	0.783939	-0.110183	0.984689	-0.168517
Amino Acids__Serine	Amino Acids	Serine	0.285451	0.671843	-0.0871396	0.990615	-0.0148903	0.98947	0.654331	0.114601	0.406862	0.536431	0.168955	0.950143	0.546918	0.415079	-0.345166	0.85786	-0.432647	0.976527	0.142643	0.803466	-0.579127	0.613246	-0.155024	0.997673	-0.225732	0.746672	-0.162968	0.996956	-0.150936	0.579184	-0.646768	0.338702	-1.24253	0.00644856	0.100496	0.764405	0.607741	0.308432	0.303242	0.725619	0.0657307	0.997151	0.287644	0.628536	0.237663	0.984689	0.0603661
Amino Acids__Threonine	Amino Acids	Threonine	0.372951	0.671843	-0.132035	0.990615	-0.0504446	0.985243	0.466373	0.205895	0.161847	0.856921	0.242845	0.933799	0.803617	0.327514	-0.293166	0.85786	-0.394946	0.976527	0.344003	0.595402	-0.401127	0.725678	-0.158027	0.997673	-0.124793	0.750764	-0.228839	0.996956	-0.207327	0.50152	-0.452163	0.358274	-0.861045	0.0206714	0.202444	0.521806	0.586683	0.280252	0.215914	0.725619	0.0568223	0.997151	0.46846	0.522326	0.260481	0.984689	-0.00663882
Amino Acids__Tryptophan	Amino Acids	Tryptophan	0.131272	0.763085	-0.278046	0.960768	-0.140671	0.980376	0.0680351	0.875445	-0.240963	0.776938	0.22002	0.938311	0.601335	0.369177	-0.234524	0.85786	-0.354356	0.976527	0.195176	0.732748	-0.510466	0.669615	-0.256523	0.997673	-0.215886	0.746672	-0.244716	0.996956	-0.236998	0.503736	-0.570873	0.11361	-1.14752	0.00584223	-0.267055	0.521806	0.441029	0.337813	0.0338975	0.962228	-0.106106	0.997151	0.158928	0.741665	-0.159246	0.984689	-0.177618
Amino Acids__Tyrosine	Amino Acids	Tyrosine	0.134482	0.758808	-0.324926	0.930174	-0.258436	0.965729	0.0174346	0.961163	-0.318205	0.631491	0.154304	0.958479	0.559472	0.341591	-0.278149	0.85786	-0.475118	0.976527	0.228376	0.659161	-0.495043	0.640059	-0.276513	0.997673	-0.11958	0.810215	-0.254701	0.996956	-0.183493	0.50152	-0.0908282	0.7699	-0.738782	0.00635823	-0.211593	0.366266	0.519931	0.380049	0.111435	0.725619	0.0366723	0.997151	0.283923	0.629834	-0.12919	0.984689	-0.179473
Amino Acids__Valine	Amino Acids	Valine	0.217813	0.697055	-0.179116	0.990615	-0.085629	0.985243	0.33931	0.309067	-0.0165432	0.988416	0.166211	0.962181	0.5943	0.351072	-0.212502	0.85786	-0.410512	0.976527	0.168768	0.75594	-0.480563	0.705726	-0.13772	0.997673	-0.149986	0.746672	-0.203638	0.996956	-0.225106	0.50152	-0.252751	0.376849	-0.622392	0.00584223	-0.273442	0.0833338	0.389373	0.386484	0.103903	0.728485	-0.0277154	0.997151	0.253311	0.646975	0.0368194	0.984689	-0.209269
Bile Acids__Cholic acid	Bile Acids	Cholic acid	ND	ND	-0.502282	0.881429	ND	ND	ND	ND	0.990543	0.323293	ND	ND	ND	ND	-1.28999	0.85786	ND	ND	ND	ND	-1.43348	0.421684	ND	ND	ND	ND	-1.23245	0.996956	ND	ND	ND	ND	-1.08097	0.509792	ND	ND	ND	ND	-1.23574	0.725619	ND	ND	ND	ND	ND	ND	ND
Bile Acids__Deoxycholic acid	Bile Acids	Deoxycholic acid	-0.0703893	0.846677	-0.561755	0.750377	0.307429	0.965729	0.392785	0.384371	0.784523	0.392518	0.341986	0.916747	ND	ND	-0.527629	0.85786	ND	ND	0.486828	0.683893	-0.368151	0.725678	0.412782	0.997673	ND	ND	-1.44103	0.996956	0.724366	0.50152	0.6102	0.441708	-1.18165	0.576423	1	0.521806	0.460974	0.58875	-1.46158	0.725619	-0.0729005	0.997151	ND	ND	-1.91388	0.984689	0.783867
Bile Acids__Glycocholic acid	Bile Acids	Glycocholic acid	ND	ND	ND	ND	ND	ND	ND	ND	ND	ND	ND	ND	ND	ND	ND	ND	ND	ND	ND	ND	ND	ND	ND	ND	0.299377	0.876157	-0.348895	0.996956	0.280824	0.674936	-0.776067	0.405183	-0.924627	0.576423	2.64351	0.559176	1.03072	0.510344	-1.02993	0.725619	0.155668	0.997151	0.958415	0.522326	-1.03159	0.984689	1.69411
Bile Acids__Glycoursodeoxycholic acid	Bile Acids	Glycoursodeoxycholic acid	0.169925	0.877272	ND	ND	ND	ND	ND	ND	ND	ND	ND	ND	0.70044	0.497536	ND	ND	ND	ND	1.22239	0.486831	ND	ND	ND	ND	0.450266	0.854838	0.381274	0.996956	1.41181	0.50152	-2.2127	0.358274	-0.642573	0.582352	2.16993	0.559176	0.760759	0.707084	0.202452	0.917184	0.528035	0.997151	1.39833	0.522973	2.06361	0.984689	3.58012
Bile Acids__Taurochenodeoxycholic acid	Bile Acids	Taurochenodeoxycholic acid	ND	ND	ND	ND	ND	ND	ND	ND	ND	ND	ND	ND	ND	ND	ND	ND	ND	ND	ND	ND	ND	ND	ND	ND	0.151396	0.891328	0.31172	0.996956	0.0486519	0.952546	-0.0432268	0.939051	-0.115948	0.794155	0.372671	0.521806	0.529106	0.558355	0.200194	0.749297	-0.26322	0.997151	0.82998	0.522326	0.0170146	0.984689	0.082634
Bile Acids__Taurocholic acid	Bile Acids	Taurocholic acid	0.420152	0.693085	-0.848592	0.881429	-0.250466	0.965729	2.42168	0.236472	0.338687	0.856921	1.55949	0.895328	2.37767	0.118864	0.466176	0.874385	0.624491	0.976527	1.42321	0.479481	1.43718	0.755253	0.38773	0.997673	0.257774	0.746672	-0.117191	0.996956	-0.140167	0.8878	0.94475	0.358274	0.271405	0.576423	-0.251057	0.764405	0.161147	0.81648	-0.610892	0.725619	-0.337175	0.997151	-0.167217	0.829468	-1.8772	0.11942	-0.854825
Bile Acids__Taurodeoxycholic acid	Bile Acids	Taurodeoxycholic acid	-1.39652	0.704085	ND	ND	ND	ND	-0.513375	0.804715	ND	ND	ND	ND	-0.46048	0.812941	ND	ND	ND	ND	ND	ND	ND	ND	ND	ND	0.118119	0.850776	-0.0962694	0.996956	-0.052854	0.949522	0.760553	0.358274	0.0267173	0.932345	-0.615435	0.521806	-0.320071	0.707084	-0.584179	0.725619	-0.3966	0.997151	-0.657009	0.56576	-2.11747	0.11942	-0.812656
Bile Acids__Tauromurocholic acid	Bile Acids	Tauromurocholic acid	1.05745	0.671843	-0.975338	0.465667	ND	ND	2.20848	0.140551	-0.168682	0.91162	ND	ND	2.60288	0.0954015	0.716928	0.85786	ND	ND	2.32193	0.479481	0.579424	0.832612	ND	ND	0.0679424	0.925973	0.215216	0.996956	-0.0780875	0.906745	-0.0624277	0.906399	-0.682122	0.374583	-0.0678918	0.92838	0.385603	0.558355	-0.0716427	0.948901	-0.318786	0.997151	0.661776	0.522973	-0.197552	0.984689	-0.195076
Bile Acids__Glycochenodeoxycholic acid	Bile Acids	Glycochenodeoxycholic acid	ND	ND	ND	ND	ND	ND	ND	ND	ND	ND	ND	ND	ND	ND	ND	ND	ND	ND	ND	ND	ND	ND	ND	ND	0.556324	0.850776	-0.0306316	0.996956	0.567288	0.572238	-2.01922	0.358274	-1.32117	0.354457	3.39951	0.54949	1.64947	0.510344	-0.0290845	0.97733	0.439532	0.997151	1.51014	0.522326	1.62874	0.984689	2.96879
Bile Acids__Glycodeoxycholic acid	Bile Acids	Glycodeoxycholic acid	ND	ND	ND	ND	ND	ND	ND	ND	ND	ND	ND	ND	ND	ND	ND	ND	ND	ND	ND	ND	ND	ND	ND	ND	0.194935	0.925973	-0.8242	0.996956	0.555811	0.579184	-1.64217	0.358274	-1.25947	0.536175	2.06809	0.527614	0.364546	0.849962	-1.5946	0.725619	-0.0115385	0.997151	0.118006	0.938056	-1.00467	0.984689	1.74415
Bile Acids__Taurolithocholic acid	Bile Acids	Taurolithocholic acid	ND	ND	ND	ND	ND	ND	ND	ND	ND	ND	ND	ND	ND	ND	ND	ND	ND	ND	ND	ND	ND	ND	ND	ND	0.296485	0.800079	-0.299316	0.996956	0.506894	0.573784	0.453005	0.431639	-0.7594	0.351383	0.226965	0.764405	0.483899	0.578966	-0.526281	0.725619	-0.146078	0.997151	0.517136	0.685416	-0.449002	0.984689	0.336812
Biogenic Amines__beta-Alanine	Biogenic Amines	beta-Alanine	0.350155	0.672635	0.515449	0.817167	0.210792	0.965729	1.30392	0.0299716	1.73653	0.259581	0.519879	0.893472	0.719504	0.356262	0.179381	0.8666	-0.0586015	0.990931	-0.288223	0.6423	-0.880319	0.482441	0.42552	0.997673	-0.22038	0.746672	0.019858	0.996956	-0.232587	0.50152	-0.282497	0.358274	-0.123324	0.671212	0.0296755	0.911494	0.00654052	0.977445	-0.0299214	0.962228	-0.224177	0.997151	0.00692433	0.976293	-0.150317	0.984689	-0.192303
Biogenic Amines__gamma-Aminobutyric acid	Biogenic Amines	gamma-Aminobutyric acid	-0.0264163	0.969922	-0.266723	0.99008	0.320901	0.972143	0.199926	0.805752	0.756024	0.372243	-0.29094	0.933799	0.360667	0.691642	-0.251569	0.868414	-0.361463	0.976527	-0.024367	0.972299	-0.876517	0.611947	0.221628	0.997673	-0.719773	0.746672	-0.695197	0.996956	0.433863	0.682027	-1.12953	0.245656	-0.997833	0.236944	-0.0514353	0.965624	-0.0845427	0.933009	-0.0469759	0.963705	0.267239	0.997151	0.336916	0.715497	0.369181	0.984689	0.140194
Biogenic Amines__Histamine	Biogenic Amines	Histamine	0.496792	0.671843	-0.0584688	0.990615	0.824584	0.94179	0.0785647	0.910847	-0.272606	0.765357	1.15285	0.885223	1.01897	0.278617	-0.293963	0.85786	0.706472	0.976527	0.335838	0.683893	-0.497235	0.683084	0.932107	0.997673	-0.145527	0.757499	-0.715014	0.996956	-0.113461	0.837462	0.354575	0.358274	-0.700248	0.576423	-0.00314793	0.994851	0.434276	0.280252	-0.655145	0.725619	0.122908	0.997151	0.478243	0.522326	-0.967572	0.984689	-0.513047
Biogenic Amines__Putrescine	Biogenic Amines	Putrescine	0.981904	0.427202	0.670083	0.490794	ND	ND	1.5387	0.038608	1.07312	0.117672	ND	ND	0.551576	0.489422	ND	ND	ND	ND	0.0967041	0.829702	ND	ND	ND	ND	-0.116009	0.946199	-0.189981	0.996956	-0.427979	0.544863	-0.879529	0.415833	0.0243079	0.946675	-0.258839	0.723245	-0.724497	0.510977	0.5417	0.749297	-0.178788	0.997151	-0.893617	0.556452	0.768596	0.979588	0.0663024
Biogenic Amines__Spermidine	Biogenic Amines	Spermidine	0.790774	0.387136	0.378106	0.881429	-0.15636	0.965729	0.550344	0.108448	-0.480555	0.344471	-0.383751	0.895328	0.494982	0.266664	-0.0203849	0.977544	-0.176406	0.976527	0.378539	0.458399	-0.142392	0.885379	-0.0666788	0.997673	-0.204275	0.746672	0.299028	0.996956	-0.291372	0.50152	-0.0644461	0.751001	-0.295198	0.576423	-0.21779	0.521806	-0.0222213	0.934001	0.207654	0.741962	-0.293085	0.997151	-0.110941	0.715497	0.0804773	0.984689	-0.155374
Biogenic Amines__Spermine	Biogenic Amines	Spermine	0.162031	0.700103	0.14433	0.990615	-0.0331249	0.985243	0.0599662	0.875445	-0.534597	0.308619	0.0225146	0.994724	-0.0544762	0.724467	0.236963	0.85786	-0.340092	0.976527	0.0424701	0.828748	-0.0919971	0.922757	-0.145856	0.997673	-0.340783	0.746672	0.23399	0.996956	-0.375207	0.50152	-0.139919	0.803879	-0.448293	0.576423	0.00631165	0.990479	0.344608	0.707084	0.11171	0.914215	-0.368909	0.997151	-0.33757	0.671568	-0.388121	0.984689	-0.0127067
Biogenic Amines__Serotonin	Biogenic Amines	Serotonin	ND	ND	ND	ND	ND	ND	ND	ND	ND	ND	ND	ND	ND	ND	ND	ND	ND	ND	ND	ND	ND	ND	ND	ND	-0.417493	0.746672	-0.78126	0.996956	-0.243318	0.630491	0.15678	0.808814	-1.16435	0.538669	-0.0350469	0.973247	0.260272	0.817398	-0.16435	0.914215	-0.110791	0.997151	-0.0363372	0.947695	-0.78309	0.984689	-0.548269
Carbohydrates a Related__Hexoses	Carbohydrates a Related	Hexoses	0.429345	0.387136	-0.315604	0.881429	-0.227222	0.94179	0.51625	0.118738	ND	ND	0.362999	0.895328	0.928772	0.324873	-0.160092	0.85786	ND	ND	0.914433	0.424733	-0.0522114	0.97389	ND	ND	0.413282	0.746672	0.00902794	0.996956	0.528733	0.50152	-0.0664437	0.914516	0.0996067	0.921565	-0.0264782	0.990479	-0.468124	0.380049	0.46318	0.728094	0.445557	0.997151	0.718306	0.522326	0.833063	0.979588	-0.0447584
Carboxylic Acids__Lactic acid	Carboxylic Acids	Lactic acid	0.954294	0.484629	0.103993	0.990615	0.173557	0.974836	1.63499	0.0384233	1.29234	0.117672	0.219428	0.895328	1.0503	0.296235	0.00226839	0.998553	ND	ND	0.363291	0.626514	-0.676937	0.574695	-0.198892	0.997673	0.286818	0.746672	-0.0920667	0.996956	0.333061	0.50152	-0.032165	0.950404	-0.073394	0.921565	0.0713368	0.940937	-0.353841	0.405663	0.0412943	0.965001	0.317646	0.997151	0.628475	0.522326	0.257441	0.984689	0.227271
Carboxylic Acids__3-Hydroxyglutaric acid	Carboxylic Acids	3-Hydroxyglutaric acid	ND	ND	ND	ND	ND	ND	ND	ND	ND	ND	ND	ND	ND	ND	ND	ND	ND	ND	ND	ND	ND	ND	ND	ND	ND	ND	ND	ND	ND	ND	ND	ND	ND	ND	ND	ND	ND	ND	0.00887307	0.97733	ND	ND	ND	ND	0.00743233	0.984689	ND
Carboxylic Acids__Aconitic acid	Carboxylic Acids	Aconitic acid	ND	ND	ND	ND	ND	ND	ND	ND	ND	ND	ND	ND	ND	ND	ND	ND	ND	ND	ND	ND	ND	ND	ND	ND	ND	ND	ND	ND	-0.265823	0.633934	ND	ND	ND	ND	-0.095898	0.911494	-0.0674714	0.890417	0.0726349	0.879512	-0.190089	0.997151	0.0446931	0.921621	-0.0682847	0.984689	-0.222082
Carboxylic Acids__Hippuric acid	Carboxylic Acids	Hippuric acid	ND	ND	ND	ND	ND	ND	ND	ND	ND	ND	ND	ND	ND	ND	ND	ND	ND	ND	ND	ND	ND	ND	ND	ND	ND	ND	ND	ND	ND	ND	ND	ND	0.4885	0.133429	ND	ND	ND	ND	0.123735	0.741962	ND	ND	ND	ND	ND	ND	ND
Carboxylic Acids__Succinic acid	Carboxylic Acids	Succinic acid	ND	ND	ND	ND	ND	ND	ND	ND	ND	ND	ND	ND	ND	ND	ND	ND	ND	ND	ND	ND	ND	ND	ND	ND	-0.261037	0.746672	0.170643	0.996956	-0.108062	0.837462	-0.431352	0.358274	0.325088	0.622705	-0.128489	0.791222	-0.687139	0.147897	0.0346541	0.969377	-0.348879	0.997151	-0.285986	0.556452	-0.0912675	0.984689	-0.380028
Ceramides__Cer(d16:1/18:0)	Ceramides	Cer(d16:1/18:0)	ND	ND	ND	ND	ND	ND	ND	ND	ND	ND	-0.0159415	0.975867	ND	ND	ND	ND	ND	ND	ND	ND	ND	ND	ND	ND	ND	ND	ND	ND	ND	ND	ND	ND	ND	ND	ND	ND	ND	ND	ND	ND	ND	ND	ND	ND	ND	ND	ND
Ceramides__Cer(d16:1/22:0)	Ceramides	Cer(d16:1/22:0)	0.345329	0.700103	-0.0352755	0.990615	ND	ND	0.862043	0.0808414	0.363151	0.492346	-0.371969	0.918129	0.507296	0.367573	ND	ND	ND	ND	0.620808	0.449752	ND	ND	ND	ND	ND	ND	ND	ND	ND	ND	ND	ND	ND	ND	ND	ND	ND	ND	ND	ND	ND	ND	ND	ND	ND	ND	ND
Ceramides__Cer(d16:1/24:0)	Ceramides	Cer(d16:1/24:0)	ND	ND	ND	ND	0.0362635	0.985243	ND	ND	ND	ND	ND	ND	ND	ND	ND	ND	ND	ND	ND	ND	ND	ND	ND	ND	ND	ND	ND	ND	ND	ND	ND	ND	ND	ND	ND	ND	ND	ND	ND	ND	ND	ND	ND	ND	ND	ND	ND
Ceramides__Cer(d18:1/14:0)	Ceramides	Cer(d18:1/14:0)	0.840273	0.427202	0.544111	0.65439	-0.0247184	0.985243	1.16527	0.0299716	0.632977	0.209578	-0.134321	0.950143	0.107086	0.84378	0.0508155	0.915932	-0.433123	0.976527	0.167932	0.732748	-0.0945748	0.897578	-0.290415	0.997673	ND	ND	ND	ND	ND	ND	ND	ND	ND	ND	ND	ND	ND	ND	ND	ND	ND	ND	ND	ND	ND	ND	ND
Ceramides__Cer(d18:1/16:0)	Ceramides	Cer(d18:1/16:0)	1.00198	0.387136	0.789008	0.366411	0.174452	0.965729	0.765261	0.051335	0.557973	0.417665	0.0737005	0.973119	0.283375	0.497536	-0.0161948	0.975851	-0.304925	0.976527	0.582493	0.424733	-0.0431792	0.964904	-0.261979	0.997673	ND	ND	-0.0804081	0.996956	-0.519534	0.684652	0.609732	0.467567	0.69621	0.426709	ND	ND	-0.535367	0.452634	0.371004	0.743609	ND	ND	ND	ND	-0.101454	0.984689	-0.819357
Ceramides__Cer(d18:1/18:0(OH))	Ceramides	Cer(d18:1/18:0(OH))	0.545559	0.532568	0.501505	0.654112	-0.0340176	0.985243	-0.140591	0.566397	-0.542343	0.339755	-0.198217	0.928971	0.519576	0.356262	0.163986	0.85786	-0.606953	0.976527	0.471732	0.435323	-0.179879	0.832612	-0.484719	0.997673	ND	ND	ND	ND	ND	ND	ND	ND	ND	ND	ND	ND	ND	ND	ND	ND	ND	ND	ND	ND	ND	ND	ND
Ceramides__Cer(d18:1/18:0)	Ceramides	Cer(d18:1/18:0)	0.643946	0.427202	0.406539	0.634161	0.0037424	0.98947	0.162986	0.648143	-0.290911	0.631491	-0.117039	0.939868	0.215654	0.580024	-0.0953708	0.85786	-0.390679	0.976527	0.452857	0.458399	-0.224242	0.715341	-0.301002	0.997673	ND	ND	ND	ND	ND	ND	0.861024	0.358274	0.315502	0.633527	ND	ND	-0.060121	0.930415	0.448985	0.725619	ND	ND	ND	ND	ND	ND	ND
Ceramides__Cer(d18:1/18:1)	Ceramides	Cer(d18:1/18:1)	0.756904	0.484629	0.419416	0.783516	0.0213737	0.985243	0.445546	0.100228	0.354447	0.393731	-0.195724	0.918129	0.28768	0.526143	0.0737265	0.900364	-0.269076	0.976527	0.51242	0.424733	0.00437844	0.999328	-0.154398	0.997673	ND	ND	ND	ND	ND	ND	ND	ND	ND	ND	ND	ND	ND	ND	ND	ND	ND	ND	ND	ND	ND	ND	ND
Ceramides__Cer(d18:1/20:0(OH))	Ceramides	Cer(d18:1/20:0(OH))	0.445611	0.387136	0.336091	0.817167	0.300659	0.94179	-0.117225	0.642011	-0.606143	0.164327	-0.0121468	0.995062	0.0895088	0.720708	0.0647045	0.879044	-0.241858	0.976527	0.323206	0.479481	-0.0555057	0.885379	-0.204633	0.997673	ND	ND	ND	ND	ND	ND	ND	ND	ND	ND	ND	ND	ND	ND	ND	ND	ND	ND	ND	ND	ND	ND	ND
Ceramides__Cer(d18:1/20:0)	Ceramides	Cer(d18:1/20:0)	0.330489	0.671843	0.0426113	0.990615	0.151415	0.972143	-0.0222865	0.961163	-0.476755	0.329815	-0.0982955	0.938311	0.0580088	0.890036	-0.140361	0.85786	-0.164889	0.976527	0.31802	0.50737	-0.364585	0.606962	-0.146112	0.997673	ND	ND	ND	ND	0.0101958	1	-0.0882865	0.928842	0.192645	0.720442	ND	ND	-1.0813	0.380049	0.678072	0.725619	ND	ND	ND	ND	-0.392317	0.984689	-0.854149
Ceramides__Cer(d18:1/22:0)	Ceramides	Cer(d18:1/22:0)	0.515742	0.484629	0.358115	0.665588	0.153174	0.965729	0.242413	0.495421	0.0760239	0.927475	-0.0204418	0.986253	0.227968	0.560221	-0.19683	0.85786	-0.240355	0.976527	0.278432	0.551392	-0.29127	0.715341	-0.18748	0.997673	ND	ND	ND	ND	ND	ND	ND	ND	ND	ND	ND	ND	-1.02809	0.380049	ND	ND	ND	ND	ND	ND	ND	ND	ND
Ceramides__Cer(d18:1/23:0)	Ceramides	Cer(d18:1/23:0)	0.660222	0.387136	0.650254	0.366411	0.187279	0.965729	-0.219404	0.503022	-0.381119	0.512595	-0.196978	0.918129	0.318565	0.431016	-0.0605966	0.892018	-0.329985	0.976527	0.391597	0.479481	-0.00617857	0.999328	-0.218921	0.997673	ND	ND	ND	ND	ND	ND	ND	ND	ND	ND	ND	ND	ND	ND	ND	ND	ND	ND	ND	ND	ND	ND	ND
Ceramides__Cer(d18:1/24:0)	Ceramides	Cer(d18:1/24:0)	0.839221	0.387136	0.723035	0.366411	0.153263	0.971512	0.1667	0.649422	-0.0346236	0.962645	-0.07288	0.973119	0.289146	0.45734	-0.121106	0.85786	-0.221306	0.976527	0.486342	0.464641	-0.238206	0.743646	-0.126203	0.997673	ND	ND	-0.657788	0.996956	-0.625526	0.572238	0.696808	0.358274	-0.331335	0.576423	ND	ND	-0.064526	0.907945	0.124533	0.914215	-0.316422	0.997151	-0.600276	0.522973	0.0103362	0.989441	-0.67752
Ceramides__Cer(d18:1/24:1)	Ceramides	Cer(d18:1/24:1)	0.794838	0.387136	0.732282	0.366411	0.0486138	0.985243	0.0220114	0.944779	-0.168013	0.824438	-0.127145	0.933799	0.263691	0.491842	-0.00320872	0.996999	-0.47721	0.976527	0.476315	0.485912	0.00226069	0.999328	-0.464909	0.997673	ND	ND	ND	ND	ND	ND	0.567143	0.358274	-0.416231	0.478945	ND	ND	-0.105972	0.779086	0.0527231	0.869353	ND	ND	-0.446716	0.522973	-0.378512	0.979588	ND
Ceramides__Cer(d18:1/25:0)	Ceramides	Cer(d18:1/25:0)	0.517892	0.387136	0.673608	0.366411	0.0996383	0.972143	0.270323	0.206809	0.0418985	0.93244	-0.179871	0.918129	0.169773	0.547957	0.0643688	0.900364	-0.416578	0.976527	0.293425	0.517469	-0.161175	0.725678	-0.432421	0.997673	ND	ND	ND	ND	ND	ND	ND	ND	ND	ND	ND	ND	ND	ND	ND	ND	ND	ND	ND	ND	ND	ND	ND
Ceramides__Cer(d18:1/26:0)	Ceramides	Cer(d18:1/26:0)	0.257559	0.700219	0.190755	0.960768	ND	ND	-0.0164881	0.961163	0.0519278	0.936323	ND	ND	0.14543	0.773017	-0.407504	0.85786	ND	ND	0.313158	0.435323	-0.219877	0.735063	ND	ND	ND	ND	ND	ND	ND	ND	ND	ND	ND	ND	ND	ND	ND	ND	ND	ND	ND	ND	ND	ND	ND	ND	ND
Ceramides__Cer(d18:1/26:1)	Ceramides	Cer(d18:1/26:1)	0.361456	0.553249	0.0396837	0.990615	-0.236581	0.965729	-0.357894	0.326468	-0.0129908	0.991111	-0.201473	0.918129	0.171543	0.704354	0.138287	0.874974	-0.512375	0.976527	0.714939	0.444278	-0.0408062	0.982712	-0.197788	0.997673	ND	ND	ND	ND	ND	ND	ND	ND	ND	ND	ND	ND	ND	ND	ND	ND	ND	ND	ND	ND	ND	ND	ND
Ceramides__Cer(d18:2/14:0)	Ceramides	Cer(d18:2/14:0)	ND	ND	ND	ND	0.868755	0.94179	ND	ND	ND	ND	0.283793	0.973119	ND	ND	ND	ND	ND	ND	ND	ND	ND	ND	ND	ND	ND	ND	ND	ND	ND	ND	ND	ND	ND	ND	ND	ND	ND	ND	ND	ND	ND	ND	ND	ND	ND	ND	ND
Ceramides__Cer(d18:2/16:0)	Ceramides	Cer(d18:2/16:0)	0.782044	0.387136	0.456569	0.665119	0.108199	0.974836	0.606372	0.0698585	0.35677	0.655668	0.323276	0.895328	0.423718	0.296235	-0.0211497	0.981528	-0.492749	0.976527	0.580585	0.446342	-0.281799	0.715341	-0.370053	0.997673	ND	ND	ND	ND	ND	ND	ND	ND	ND	ND	ND	ND	ND	ND	ND	ND	ND	ND	ND	ND	ND	ND	ND
Ceramides__Cer(d18:2/18:0)	Ceramides	Cer(d18:2/18:0)	0.82662	0.39875	0.374719	0.781258	-0.0895497	0.974836	0.532677	0.124444	0.114102	0.904894	-0.138753	0.933799	0.524876	0.355724	0.22786	0.85786	-0.572529	0.976527	0.666773	0.435068	-0.179324	0.799457	-0.473303	0.997673	ND	ND	ND	ND	ND	ND	ND	ND	ND	ND	ND	ND	ND	ND	-0.321928	0.725619	ND	ND	ND	ND	-0.383329	0.979588	-0.115477
Ceramides__Cer(d18:2/18:1)	Ceramides	Cer(d18:2/18:1)	ND	ND	ND	ND	ND	ND	ND	ND	ND	ND	ND	ND	ND	ND	ND	ND	ND	ND	ND	ND	ND	ND	ND	ND	-2.28096	0.746672	ND	ND	0	1	-0.0919225	0.957157	-1.93681	0.622705	2.18948	0.581791	-2.43296	0.617461	-1.89616	0.725619	-0.247928	0.997151	-2.28096	0.715497	0.595689	0.984689	ND
Ceramides__Cer(d18:2/20:0)	Ceramides	Cer(d18:2/20:0)	0.32719	0.671843	-0.230251	0.881429	0.0862908	0.980376	0.0421469	0.934609	-0.39635	0.534182	0.227276	0.895328	0.328577	0.514085	-0.108752	0.874427	-0.307241	0.976527	0.426184	0.458399	-0.558731	0.490577	-0.251273	0.997673	ND	ND	ND	ND	ND	ND	ND	ND	ND	ND	ND	ND	ND	ND	ND	ND	ND	ND	ND	ND	ND	ND	ND
Ceramides__Cer(d18:2/22:0)	Ceramides	Cer(d18:2/22:0)	0.473969	0.651211	0.0911998	0.990615	0.192324	0.965729	0.296973	0.317287	0.0637099	0.936323	0.602006	0.885223	0.317578	0.35785	-0.177818	0.85786	-0.337766	0.976527	0.408886	0.46691	-0.516392	0.514327	-0.246161	0.997673	ND	ND	ND	ND	ND	ND	ND	ND	ND	ND	ND	ND	ND	ND	ND	ND	ND	ND	ND	ND	ND	ND	ND
Ceramides__Cer(d18:2/23:0)	Ceramides	Cer(d18:2/23:0)	0.637345	0.480571	0.155278	0.960768	0.161444	0.965729	-0.192645	0.6699	-0.618968	0.234963	0.0917426	0.950143	0.216922	0.620132	-0.169413	0.85786	-0.389891	0.976527	0.435788	0.490932	-0.317835	0.605693	-0.271805	0.997673	ND	ND	ND	ND	ND	ND	ND	ND	-0.0995357	0.847341	ND	ND	-0.192645	0.707084	-0.0489096	0.938455	ND	ND	ND	ND	ND	ND	ND
Ceramides__Cer(d18:2/24:0)	Ceramides	Cer(d18:2/24:0)	0.83701	0.387136	0.353367	0.781258	0.252945	0.94179	0.204319	0.503022	0.0555161	0.936323	0.25366	0.895328	0.384393	0.354613	-0.0257531	0.965624	-0.260989	0.976527	0.514337	0.458399	-0.295537	0.654096	-0.11395	0.997673	ND	ND	ND	ND	ND	ND	ND	ND	0.267391	0.785615	ND	ND	ND	ND	0.0458037	0.917184	ND	ND	ND	ND	0.154328	0.984689	ND
Ceramides__Cer(d18:2/24:1)	Ceramides	Cer(d18:2/24:1)	0.817828	0.387136	0.451139	0.817167	-0.241426	0.965729	0.29236	0.325705	-0.0376186	0.963358	-0.307816	0.895328	0.603854	0.320126	0.0961735	0.915932	-0.595334	0.976527	0.691956	0.466288	-0.14715	0.867977	-0.62407	0.997673	ND	ND	ND	ND	ND	ND	ND	ND	0.22741	0.839175	ND	ND	ND	ND	ND	ND	ND	ND	ND	ND	ND	ND	ND
Cholesterol Esters__CE(18:2)	Cholesterol Esters	CE(18:2)	ND	ND	ND	ND	0.0874971	0.985243	1.2248	0.118738	ND	ND	0.322882	0.933799	3.01991	0.511879	ND	ND	ND	ND	ND	ND	ND	ND	-0.0175655	0.997673	ND	ND	ND	ND	ND	ND	ND	ND	0.378146	0.812237	ND	ND	ND	ND	ND	ND	ND	ND	ND	ND	ND	ND	ND
Cholesterol Esters__CE(20:3)	Cholesterol Esters	CE(20:3)	ND	ND	ND	ND	0.226123	0.965729	ND	ND	ND	ND	ND	ND	ND	ND	ND	ND	ND	ND	ND	ND	ND	ND	ND	ND	ND	ND	ND	ND	ND	ND	ND	ND	ND	ND	ND	ND	ND	ND	ND	ND	ND	ND	ND	ND	ND	ND	ND
Cholesterol Esters__CE(20:4)	Cholesterol Esters	CE(20:4)	1.02199	0.671843	0.841385	0.750377	0.370978	0.965729	1.77195	0.0421286	1.21073	0.208777	0.580634	0.895328	1.22268	0.234923	0.589174	0.85786	0.159418	0.976527	0.572362	0.479481	0.27606	0.832612	0.122177	0.997673	0.603098	0.746672	0.153093	0.996956	-1.0872	0.50152	1.52558	0.431639	0.332217	0.745627	ND	ND	0.0712147	0.951877	-0.500124	0.741424	-0.521724	0.997151	ND	ND	ND	ND	ND
Cholesterol Esters__CE(22:6)	Cholesterol Esters	CE(22:6)	0.639469	0.671843	0.449111	0.906875	-0.321545	0.94179	0.776417	0.304663	0.00503802	0.993814	ND	ND	ND	ND	0.453248	0.85786	-0.441339	0.976527	1.25568	0.424733	ND	ND	ND	ND	ND	ND	ND	ND	ND	ND	ND	ND	ND	ND	ND	ND	ND	ND	ND	ND	ND	ND	ND	ND	ND	ND	ND
Cresols__p-Cresol sulfate	Cresols	p-Cresol sulfate	ND	ND	ND	ND	ND	ND	ND	ND	ND	ND	ND	ND	ND	ND	ND	ND	ND	ND	ND	ND	ND	ND	ND	ND	-0.0884311	0.956565	0.693274	0.996956	0.0258855	0.974683	-0.106274	0.884145	1.17697	0.0600691	0.0719249	0.984524	-0.248691	0.67509	-0.74719	0.725619	ND	ND	-0.830472	0.522326	0.176251	0.984689	1.21381
Diglycerides__DG(14:0_18:1)	Diglycerides	DG(14:0_18:1)	0.135356	0.846677	-0.373838	0.930174	-0.0267531	0.985243	ND	ND	ND	ND	-0.616728	0.893472	0.107788	0.879767	0.454245	0.85786	-0.412592	0.976527	0.800156	0.458399	-0.116656	0.927401	-0.0732089	0.997673	ND	ND	ND	ND	ND	ND	ND	ND	ND	ND	ND	ND	ND	ND	ND	ND	ND	ND	ND	ND	ND	ND	ND
Diglycerides__DG(14:0_18:2)	Diglycerides	DG(14:0_18:2)	-0.00614831	0.988914	-0.490236	0.812999	0.539656	0.965729	ND	ND	ND	ND	-0.068852	0.973119	0.753663	0.371951	0.282632	0.891299	-0.242985	0.976527	0.931075	0.444278	-0.166515	0.885379	-0.0207799	0.997673	ND	ND	ND	ND	ND	ND	ND	ND	ND	ND	ND	ND	ND	ND	ND	ND	ND	ND	ND	ND	ND	ND	ND
Diglycerides__DG(14:1_18:1)	Diglycerides	DG(14:1_18:1)	0.0897547	0.861875	-0.292236	0.817167	0.0292372	0.985243	ND	ND	ND	ND	-0.735704	0.893472	0.23349	0.636558	ND	ND	-0.565779	0.976527	0.70941	0.48956	0.288266	0.691403	-0.412767	0.997673	ND	ND	ND	ND	ND	ND	ND	ND	ND	ND	ND	ND	ND	ND	ND	ND	ND	ND	ND	ND	ND	ND	ND
Diglycerides__DG(16:0_16:1)	Diglycerides	DG(16:0_16:1)	0.302244	0.672635	-0.332076	0.960768	0.148959	0.974836	-1.31018	0.0512094	-1.55858	0.201592	-0.463509	0.895328	0.091423	0.833903	0.478911	0.85786	-0.37216	0.976527	0.605601	0.479824	-0.0382555	0.983759	-0.242742	0.997673	ND	ND	ND	ND	ND	ND	ND	ND	ND	ND	ND	ND	ND	ND	ND	ND	ND	ND	ND	ND	ND	ND	ND
Diglycerides__DG(16:0_18:1)	Diglycerides	DG(16:0_18:1)	0.308778	0.672635	0.0360963	0.990615	0.181185	0.96865	-1.01636	0.0721916	-0.865282	0.20004	-0.281131	0.895328	0.331969	0.501396	0.252163	0.85786	-0.289472	0.976527	0.474962	0.517469	0.14803	0.85749	-0.245654	0.997673	ND	ND	ND	ND	ND	ND	ND	ND	ND	ND	ND	ND	ND	ND	ND	ND	ND	ND	ND	ND	ND	ND	ND
Diglycerides__DG(16:0_18:2)	Diglycerides	DG(16:0_18:2)	0.281934	0.672635	0.0573381	0.990615	0.488999	0.94179	-1.06183	0.0421286	-1.1152	0.152728	-0.190188	0.933799	0.770494	0.17726	0.313981	0.85786	0.0120761	0.998075	0.765359	0.434535	0.341196	0.602814	-0.204767	0.997673	-0.411061	0.746672	-0.223513	0.996956	-0.316876	0.630491	0.155293	0.738886	-0.355578	0.526626	-0.564242	0.543304	-0.460027	0.367066	-0.479561	0.725619	-0.403265	0.997151	-0.640419	0.522326	-0.297513	0.984689	-0.209012
Diglycerides__DG(16:0_20:3)	Diglycerides	DG(16:0_20:3)	0.163043	0.79921	0.150368	0.990615	-0.00740566	0.98947	-0.218591	0.629413	-0.474894	0.312566	-0.228305	0.933799	0.586305	0.418998	-0.00623195	0.996999	-0.328054	0.976527	0.888324	0.424733	-0.988674	0.366117	-0.0434393	0.997673	ND	ND	ND	ND	ND	ND	ND	ND	ND	ND	ND	ND	ND	ND	ND	ND	ND	ND	ND	ND	ND	ND	ND
Diglycerides__DG(16:0_20:4)	Diglycerides	DG(16:0_20:4)	0.129885	0.806567	0.674023	0.705979	-0.097686	0.984885	-0.0525482	0.88711	0.427318	0.544582	-0.474187	0.895328	0.203686	0.446224	0.36275	0.85786	-0.258361	0.976527	0.707968	0.368018	0.351892	0.691403	-0.497008	0.997673	ND	ND	ND	ND	ND	ND	ND	ND	ND	ND	ND	ND	ND	ND	ND	ND	ND	ND	ND	ND	ND	ND	ND
Diglycerides__DG(16:1_18:0)	Diglycerides	DG(16:1_18:0)	ND	ND	-0.18929	0.985602	0.025768	0.985243	ND	ND	ND	ND	-0.290736	0.895328	ND	ND	0.567041	0.85786	-0.354375	0.976527	ND	ND	-0.0324215	0.981422	-0.283985	0.997673	ND	ND	ND	ND	ND	ND	ND	ND	ND	ND	ND	ND	ND	ND	ND	ND	ND	ND	ND	ND	ND	ND	ND
Diglycerides__DG(16:1_18:1)	Diglycerides	DG(16:1_18:1)	0.322971	0.80905	-0.466463	0.960768	0.646172	0.94179	ND	ND	-0.393182	0.864136	0.514251	0.905426	-0.157536	0.859577	1.01685	0.85786	-0.695237	0.976527	0.680972	0.526982	0.22592	0.922757	0.336769	0.997673	ND	ND	ND	ND	ND	ND	ND	ND	ND	ND	ND	ND	ND	ND	ND	ND	ND	ND	ND	ND	ND	ND	ND
Diglycerides__DG(16:1_18:2)	Diglycerides	DG(16:1_18:2)	0.0495584	0.917366	-0.366224	0.881429	0.73989	0.94179	-1.86251	0.0299716	-1.78389	0.142393	-0.0173257	0.995062	0.588009	0.214809	0.849546	0.85786	-0.0818443	0.986837	0.670802	0.479481	0.42051	0.688915	-0.244315	0.997673	-0.0852591	0.890923	ND	ND	-0.713696	0.50152	-0.0336404	0.917385	-0.32646	0.576423	ND	ND	-0.794183	0.247067	-0.0287243	0.969377	ND	ND	-0.412476	0.56576	0.337358	0.984689	-0.367606
Diglycerides__DG(17:0_18:1)	Diglycerides	DG(17:0_18:1)	0.271797	0.671843	0.126757	0.960768	0.243899	0.965729	0.27678	0.0597125	0.30465	0.563769	0.151121	0.918129	0.335276	0.409124	0.375236	0.85786	-0.426448	0.976527	0.371249	0.424733	0.0963261	0.885379	0.0140409	0.997673	ND	ND	ND	ND	ND	ND	ND	ND	ND	ND	ND	ND	ND	ND	ND	ND	ND	ND	ND	ND	ND	ND	ND
Diglycerides__DG(18:0_20:4)	Diglycerides	DG(18:0_20:4)	-0.0878345	0.861598	0.516813	0.842007	0.10428	0.984885	-0.459156	0.294989	0.0974799	0.927475	-0.491349	0.895328	0.220504	0.643701	0.554291	0.85786	-0.229671	0.976527	0.557696	0.479481	0.44072	0.731124	-0.39207	0.997673	ND	ND	ND	ND	ND	ND	ND	ND	0.809421	0.121469	ND	ND	ND	ND	ND	ND	ND	ND	ND	ND	ND	ND	ND
Diglycerides__DG(18:1_18:1)	Diglycerides	DG(18:1_18:1)	0.229463	0.716008	0.0150576	0.990615	0.237485	0.965729	-1.40437	0.0721916	-1.24718	0.128844	-0.593235	0.895328	0.456223	0.418998	0.747335	0.85786	-0.344459	0.976527	0.65529	0.479481	0.537846	0.574695	-0.321436	0.997673	-0.0492095	0.905898	-0.325071	0.996956	ND	ND	0.173424	0.487966	ND	ND	ND	ND	-0.52977	0.247067	-0.26928	0.725619	ND	ND	-0.450254	0.522326	0.163119	0.984689	ND
Diglycerides__DG(18:1_18:2)	Diglycerides	DG(18:1_18:2)	0.14055	0.770822	0.253702	0.856627	0.68703	0.94179	-1.16469	0.0358203	-1.00782	0.174167	-0.101206	0.973119	0.943719	0.125899	0.890548	0.85786	-0.0431331	0.990931	0.951575	0.424733	0.782307	0.385725	-0.210051	0.997673	-0.329323	0.746672	-0.384751	0.996956	-0.298549	0.73404	0.0684268	0.848871	-0.867028	0.0429516	-0.319973	0.764405	-0.616344	0.158925	-0.301824	0.725619	ND	ND	-0.609012	0.522326	0.021521	0.984689	-0.227233
Diglycerides__DG(18:1_20:0)	Diglycerides	DG(18:1_20:0)	0.153047	0.835847	0.343379	0.71147	0.00621641	0.98947	0.565119	0.102681	0.461965	0.611122	0.0518466	0.973119	0.178113	0.501876	ND	ND	-0.397655	0.976527	0.0147052	0.968084	0.350704	0.691403	-0.105403	0.997673	ND	ND	ND	ND	ND	ND	ND	ND	ND	ND	ND	ND	ND	ND	ND	ND	ND	ND	ND	ND	ND	ND	ND
Diglycerides__DG(18:1_20:1)	Diglycerides	DG(18:1_20:1)	0.426397	0.671843	0.19238	0.881429	-0.149576	0.965729	0.253021	0.085683	0.558196	0.339479	ND	ND	0.238594	0.703738	0.455569	0.85786	-0.470927	0.976527	0.532706	0.424733	0.219966	0.794066	-0.0347654	0.997673	ND	ND	ND	ND	ND	ND	ND	ND	ND	ND	ND	ND	ND	ND	ND	ND	ND	ND	ND	ND	ND	ND	ND
Diglycerides__DG(18:1_20:2)	Diglycerides	DG(18:1_20:2)	ND	ND	ND	ND	0.0118298	0.988328	ND	ND	ND	ND	-0.223833	0.895328	ND	ND	ND	ND	ND	ND	ND	ND	ND	ND	0.201258	0.997673	ND	ND	ND	ND	ND	ND	ND	ND	ND	ND	ND	ND	ND	ND	ND	ND	ND	ND	ND	ND	ND	ND	ND
Diglycerides__DG(18:1_20:3)	Diglycerides	DG(18:1_20:3)	ND	ND	ND	ND	ND	ND	ND	ND	ND	ND	ND	ND	ND	ND	ND	ND	0.429251	0.976527	ND	ND	ND	ND	ND	ND	ND	ND	ND	ND	ND	ND	ND	ND	ND	ND	ND	ND	ND	ND	ND	ND	ND	ND	ND	ND	ND	ND	ND
Diglycerides__DG(18:1_20:4)	Diglycerides	DG(18:1_20:4)	ND	ND	ND	ND	0.257785	0.965729	ND	ND	ND	ND	0.0106788	0.999071	ND	ND	ND	ND	-0.00357723	0.998075	ND	ND	ND	ND	ND	ND	ND	ND	ND	ND	ND	ND	ND	ND	ND	ND	ND	ND	ND	ND	ND	ND	ND	ND	ND	ND	ND	ND	ND
Diglycerides__DG(18:2_18:2)	Diglycerides	DG(18:2_18:2)	0.0277037	0.954806	0.500047	0.776034	1.09703	0.94179	-1.13244	0.0464289	-0.643999	0.448184	0.305662	0.933799	1.34677	0.0485967	0.996088	0.85786	0.249978	0.976527	1.26684	0.424733	0.91727	0.366117	-0.0507782	0.997673	-0.456378	0.746672	-0.129181	0.996956	-0.289994	0.709812	0.124495	0.813559	-0.686551	0.0587938	-0.60237	0.585422	-0.557855	0.321577	-0.231726	0.725619	-0.360622	0.997151	-0.630503	0.522326	-0.0676821	0.984689	-0.0706696
Diglycerides__DG(18:2_18:3)	Diglycerides	DG(18:2_18:3)	0.23439	0.677297	-0.044633	0.990615	0.712734	0.965729	-0.583838	0.231468	-0.183122	0.832054	0.116761	0.973119	0.754713	0.209807	0.483378	0.85786	-0.189896	0.976527	1.21046	0.424733	0.495492	0.514327	ND	ND	0.123872	0.810215	-0.216422	0.996956	ND	ND	0.39752	0.427715	-0.550101	0.493979	ND	ND	-0.288125	0.380049	-0.29244	0.725619	ND	ND	-0.609393	0.141453	0.298624	0.984689	ND
Diglycerides__DG(18:2_20:0)	Diglycerides	DG(18:2_20:0)	0.438218	0.733244	0.53018	0.759882	-0.205684	0.965729	1.2472	0.0655066	1.2556	0.213014	ND	ND	0.219196	0.789724	ND	ND	ND	ND	0.7132	0.491083	0.336479	0.67394	-0.11714	0.997673	ND	ND	ND	ND	ND	ND	ND	ND	ND	ND	ND	ND	ND	ND	ND	ND	ND	ND	ND	ND	ND	ND	ND
Diglycerides__DG(18:2_20:4)	Diglycerides	DG(18:2_20:4)	ND	ND	ND	ND	ND	ND	ND	ND	ND	ND	ND	ND	ND	ND	ND	ND	ND	ND	ND	ND	ND	ND	ND	ND	-0.311271	0.746672	-0.120424	0.996956	-0.561662	0.50152	0.149613	0.848871	-0.561346	0.576423	ND	ND	-0.651483	0.380049	-0.012091	0.97733	ND	ND	ND	ND	-0.0510384	0.984689	ND
Dihexosylceramides__Hex2Cer(d18:1/14:0)	Dihexosylceramides	Hex2Cer(d18:1/14:0)	0.200762	0.671843	0.025004	0.990615	0.0447383	0.972143	ND	ND	-0.0830557	0.911332	-0.274439	0.885223	0.196397	0.367573	-0.0830557	0.907062	-0.106042	0.976527	0.311202	0.424733	-0.235059	0.725678	ND	ND	ND	ND	ND	ND	ND	ND	ND	ND	ND	ND	ND	ND	ND	ND	ND	ND	ND	ND	ND	ND	ND	ND	ND
Dihexosylceramides__Hex2Cer(d18:1/16:0)	Dihexosylceramides	Hex2Cer(d18:1/16:0)	0.338513	0.671843	0.309879	0.788168	0.177409	0.971529	0.14346	0.738993	0.0463839	0.948002	-0.205861	0.918129	0.275403	0.531882	0.33331	0.85786	-0.321928	0.976527	0.45701	0.517469	-0.205353	0.744206	-0.152003	0.997673	ND	ND	ND	ND	ND	ND	ND	ND	ND	ND	ND	ND	ND	ND	ND	ND	ND	ND	ND	ND	ND	ND	ND
Dihexosylceramides__Hex2Cer(d18:1/18:0)	Dihexosylceramides	Hex2Cer(d18:1/18:0)	0.345455	0.671843	-0.178146	0.94246	0.310094	0.965729	-0.7161	0.136161	-1.24565	0.117672	-0.326847	0.895328	0.968124	0.206732	0.0891763	0.888992	-0.120579	0.976527	1.4807	0.424733	-0.0073048	0.999328	-0.291691	0.997673	ND	ND	ND	ND	ND	ND	ND	ND	ND	ND	ND	ND	ND	ND	ND	ND	ND	ND	ND	ND	ND	ND	ND
Dihexosylceramides__Hex2Cer(d18:1/20:0)	Dihexosylceramides	Hex2Cer(d18:1/20:0)	0.0987015	0.861571	-0.346866	0.705979	-0.217175	0.965729	-0.567349	0.322108	-1.13083	0.117672	-0.841738	0.885223	0.244852	0.609475	-0.0510676	0.90546	-0.312253	0.976527	0.539786	0.479481	-0.137213	0.86028	-0.357459	0.997673	ND	ND	ND	ND	ND	ND	ND	ND	ND	ND	ND	ND	ND	ND	ND	ND	ND	ND	ND	ND	ND	ND	ND
Dihexosylceramides__Hex2Cer(d18:1/22:0)	Dihexosylceramides	Hex2Cer(d18:1/22:0)	0.238242	0.701929	-0.13802	0.94246	-0.0217528	0.985243	-0.624255	0.274999	-0.648946	0.167396	-0.381563	0.895328	0.291739	0.580024	-0.0734573	0.879407	-0.477322	0.976527	0.49055	0.490932	-0.195967	0.752658	-0.477322	0.997673	ND	ND	ND	ND	ND	ND	ND	ND	0.131245	0.812237	ND	ND	ND	ND	0.237039	0.829181	ND	ND	ND	ND	ND	ND	ND
Dihexosylceramides__Hex2Cer(d18:1/24:0)	Dihexosylceramides	Hex2Cer(d18:1/24:0)	0.131245	0.79921	0.0832021	0.990615	0.184506	0.965729	-0.539422	0.222686	-0.614769	0.317191	-0.127192	0.933799	0.250361	0.555368	0.0732867	0.915932	-0.482184	0.976527	0.2409	0.733016	-0.255441	0.738134	-0.347001	0.997673	ND	ND	ND	ND	ND	ND	ND	ND	ND	ND	ND	ND	ND	ND	ND	ND	ND	ND	ND	ND	ND	ND	ND
Dihexosylceramides__Hex2Cer(d18:1/24:1)	Dihexosylceramides	Hex2Cer(d18:1/24:1)	0.155795	0.75808	-0.0615196	0.990615	-0.0962632	0.980376	-0.432011	0.381268	-0.967518	0.128016	-0.507838	0.893472	0.286051	0.514085	0.141356	0.85786	-0.551985	0.976527	0.467844	0.505598	-0.22148	0.691403	-0.480432	0.997673	ND	ND	ND	ND	ND	ND	ND	ND	ND	ND	ND	ND	ND	ND	ND	ND	ND	ND	ND	ND	ND	ND	ND
Dihexosylceramides__Hex2Cer(d18:1/26:1)	Dihexosylceramides	Hex2Cer(d18:1/26:1)	0.246741	0.700103	0	1	-0.0529813	0.972143	ND	ND	-0.279436	0.631491	-0.932255	0.885223	ND	ND	-0.430453	0.85786	-0.584096	0.976527	ND	ND	-0.453173	0.669615	-0.396659	0.997673	ND	ND	ND	ND	ND	ND	ND	ND	ND	ND	ND	ND	ND	ND	ND	ND	ND	ND	ND	ND	ND	ND	ND
Dihydroceramides__Cer(d18:0/22:0)	Dihydroceramides	Cer(d18:0/22:0)	0.236336	0.671843	0.166965	0.985602	0.242387	0.965729	0.0710674	0.837779	0.174033	0.864136	0.121869	0.950143	0.173493	0.679246	-0.0858007	0.915932	-0.125065	0.976527	0.575299	0.458399	-0.155607	0.889106	-0.0776467	0.997673	ND	ND	ND	ND	ND	ND	ND	ND	ND	ND	ND	ND	ND	ND	ND	ND	ND	ND	ND	ND	ND	ND	ND
Dihydroceramides__Cer(d18:0/24:0)	Dihydroceramides	Cer(d18:0/24:0)	0.598487	0.427202	0.477427	0.654112	0.152952	0.965729	0.280167	0.34871	-0.108205	0.894529	-0.165778	0.918129	0.0640956	0.832087	-0.215428	0.85786	-0.253574	0.976527	0.491693	0.424733	-0.0882775	0.922757	-0.0458037	0.997673	ND	ND	ND	ND	ND	ND	ND	ND	ND	ND	ND	ND	ND	ND	ND	ND	ND	ND	ND	ND	ND	ND	ND
Fatty Acids__Arachidonic acid	Fatty Acids	Arachidonic acid	0.541868	0.387136	0.561815	0.488966	-0.04232	0.985243	1.10896	0.0299716	1.48817	0.0346772	-0.121604	0.933799	0.586643	0.355724	0.679189	0.85786	-0.310773	0.976527	0.300585	0.597696	0.156319	0.868702	0.0693592	0.997673	-0.4506	0.715796	-0.507979	0.996956	-0.359528	0.50152	-0.392512	0.358274	-0.852795	0.326292	-0.38566	0.521806	0.00390632	0.995591	-0.327517	0.725619	-0.300025	0.997151	-0.107446	0.741665	-0.610952	0.979588	-0.191998
Fatty Acids__Docosahexaenoid acid	Fatty Acids	Docosahexaenoid acid	0.0570332	0.862504	0.278846	0.920125	-0.208862	0.965729	-0.0129052	0.967583	0.0126997	0.979852	-0.333743	0.895328	0.238919	0.564631	0.210912	0.85786	-0.331617	0.976527	0.169765	0.733016	-0.443163	0.574695	-0.214725	0.997673	-0.469108	0.715796	-0.435454	0.996956	-0.299476	0.50152	-0.591931	0.135042	-1.13415	0.0862485	-0.297452	0.521806	-0.0792905	0.846646	-0.361553	0.725619	-0.202237	0.997151	-0.210672	0.56576	-0.599723	0.926983	-0.410291
Fatty Acids__Eicosadienoic acid (20:2)	Fatty Acids	Eicosadienoic acid (20:2)	0.618319	0.671843	0.426869	0.817167	-0.40241	0.94179	1.16071	0.0299716	0.953988	0.117672	-0.210236	0.918129	0.196874	0.789724	0.489538	0.85786	ND	ND	0.312622	0.567355	0.00879516	0.999328	0.150988	0.997673	ND	ND	ND	ND	ND	ND	ND	ND	ND	ND	ND	ND	ND	ND	ND	ND	ND	ND	ND	ND	ND	ND	ND
Fatty Acids__Eicosapentaenoic acid	Fatty Acids	Eicosapentaenoic acid	0.62902	0.404725	0.449301	0.849932	0.0731487	0.984885	1.2039	0.0299716	1.50042	0.0346772	0.421697	0.895328	0.276868	0.610865	0.529768	0.85786	-0.327521	0.976527	0.26991	0.6423	0.0528484	0.965965	0.0796975	0.997673	-0.0103348	0.981623	-0.391337	0.996956	-0.351464	0.60525	-0.470964	0.358274	-0.854309	0.326292	-0.0140128	0.990479	-0.126377	0.809695	-0.224845	0.772744	-0.379197	0.997151	-0.368722	0.522326	-0.156872	0.984689	0.112897
Fatty Acids__Eicosatrienoic acid (20:3)	Fatty Acids	Eicosatrienoic acid (20:3)	0.348136	0.671843	-0.160689	0.960768	-0.242966	0.94179	0.625864	0.0664897	0.0877505	0.864136	-0.634114	0.885223	0.76037	0.296235	0.11171	0.85786	-0.352115	0.976527	0.657441	0.424733	-0.674165	0.366117	0.159225	0.997673	0.156051	0.794752	-0.496489	0.996956	ND	ND	0.292188	0.431639	-0.111296	0.812237	ND	ND	0.0971248	0.852217	-0.134817	0.787449	-0.467606	0.997151	-0.283985	0.646975	-0.323803	0.984689	ND
Fatty Acids__Eicosenoic acid (20:1)	Fatty Acids	Eicosenoic acid (20:1)	0.380095	0.671843	0.323168	0.800853	-0.344585	0.94179	0.635556	0.0614924	0.626683	0.144184	-0.338325	0.893472	0.0716816	0.878862	0.320873	0.85786	-0.533328	0.976527	0.167322	0.633416	0.200285	0.680672	-0.129345	0.997673	ND	ND	ND	ND	ND	ND	ND	ND	ND	ND	ND	ND	ND	ND	ND	ND	ND	ND	ND	ND	ND	ND	ND
Fatty Acids__Octadecadienoic acid (18:2)	Fatty Acids	Octadecadienoic acid (18:2)	-0.0894351	0.680498	-0.095452	0.990615	0.219583	0.965729	0.218042	0.209777	0.12071	0.776938	-0.0409949	0.974506	0.144551	0.608074	0.272713	0.85786	-0.139788	0.976527	0.072008	0.830254	0.141069	0.834185	0.111239	0.997673	-0.123209	0.746672	-0.420891	0.0531407	-0.0350666	0.906745	-0.132521	0.599658	-0.688325	0.0143855	-0.123848	0.767258	0.184863	0.56387	-0.0593754	0.772751	-0.111937	0.997151	-0.116594	0.715497	-0.150802	0.979588	-0.0631017
Hexosylceramides__HexCer(d18:1/14:0)	Hexosylceramides	HexCer(d18:1/14:0)	0.5562	0.39875	0.662805	0.366411	-0.0369942	0.985243	0.702051	0.0702801	0.439133	0.508072	-0.154034	0.918129	0.174396	0.489422	0.372659	0.85786	-0.442694	0.976527	0.479658	0.458399	0.185032	0.67394	-0.270358	0.997673	ND	ND	ND	ND	ND	ND	ND	ND	ND	ND	ND	ND	ND	ND	ND	ND	ND	ND	ND	ND	ND	ND	ND
Hexosylceramides__HexCer(d18:1/16:0)	Hexosylceramides	HexCer(d18:1/16:0)	0.575917	0.555768	0.697039	0.428588	0.17368	0.965729	0.239996	0.502399	0.219321	0.842188	0.104408	0.950143	0.251088	0.601842	0.180362	0.85786	-0.138057	0.976527	0.480588	0.458399	0.0277734	0.985278	-0.0751343	0.997673	ND	ND	-0.0544478	0.996956	-0.520664	0.579184	0.612977	0.427715	0.332575	0.576423	ND	ND	-0.299871	0.551394	0.486698	0.725619	ND	ND	ND	ND	-1.16993	0.171261	-0.408606
Hexosylceramides__HexCer(d18:1/18:0)	Hexosylceramides	HexCer(d18:1/18:0)	0.439562	0.553249	0.380812	0.488966	0.290435	0.94179	0.0691934	0.875702	-0.211756	0.77331	0.189929	0.895328	0.510729	0.296235	0.171919	0.85786	-0.0652915	0.982198	0.778592	0.424733	-0.0192844	0.993623	-0.00639777	0.997673	ND	ND	ND	ND	ND	ND	ND	ND	ND	ND	ND	ND	ND	ND	ND	ND	ND	ND	ND	ND	ND	ND	ND
Hexosylceramides__HexCer(d18:1/18:1)	Hexosylceramides	HexCer(d18:1/18:1)	0.488619	0.387136	0.508835	0.366411	-0.0935928	0.978065	-0.229868	0.124365	-0.087004	0.894876	-0.244307	0.895328	0.158698	0.581197	0.401205	0.85786	-0.144772	0.976527	0.543362	0.424733	0.372569	0.588087	0.0568623	0.997673	ND	ND	ND	ND	ND	ND	ND	ND	ND	ND	ND	ND	ND	ND	ND	ND	ND	ND	ND	ND	ND	ND	ND
Hexosylceramides__HexCer(d18:1/20:0)	Hexosylceramides	HexCer(d18:1/20:0)	0.203231	0.705186	0.0284939	0.990615	0.149886	0.965729	-0.030925	0.944779	-0.349284	0.577044	-0.0591161	0.950143	0.2263	0.531288	0.197792	0.85786	-0.0903445	0.976527	0.460396	0.435323	-0.267569	0.708541	-0.155786	0.997673	ND	ND	ND	ND	ND	ND	ND	ND	ND	ND	ND	ND	ND	ND	ND	ND	ND	ND	ND	ND	ND	ND	ND
Hexosylceramides__HexCer(d18:1/22:0)	Hexosylceramides	HexCer(d18:1/22:0)	0.297894	0.671843	0.312324	0.812999	0.174977	0.965729	0.151283	0.709863	0.0619645	0.948002	0.0375099	0.974506	0.392815	0.408322	0.146488	0.85786	-0.164926	0.976527	0.456384	0.463261	-0.152459	0.86028	-0.136297	0.997673	ND	ND	ND	ND	ND	ND	ND	ND	ND	ND	ND	ND	ND	ND	ND	ND	ND	ND	ND	ND	ND	ND	ND
Hexosylceramides__HexCer(d18:1/23:0)	Hexosylceramides	HexCer(d18:1/23:0)	0.46496	0.551346	0.574024	0.400051	0.42424	0.94179	-0.281068	0.48517	-0.5373	0.329815	-0.000914313	1	0.486387	0.340044	0.108807	0.85786	-0.0991179	0.976527	0.738399	0.424733	0.089307	0.922757	-0.00696336	0.997673	ND	ND	ND	ND	ND	ND	-0.199693	0.358274	ND	ND	ND	ND	-0.129303	0.510977	ND	ND	ND	ND	-0.0235014	0.931573	-0.0421255	0.984689	ND
Hexosylceramides__HexCer(d18:1/24:0)	Hexosylceramides	HexCer(d18:1/24:0)	0.752924	0.387136	0.811861	0.366411	0.737166	0.94179	0.249304	0.578132	0.0539147	0.948002	0.301315	0.895328	0.721273	0.296235	0.19544	0.85786	0.182577	0.976527	1.15995	0.424733	0.0040311	0.999328	0.0278214	0.997673	ND	ND	ND	ND	ND	ND	ND	ND	ND	ND	ND	ND	ND	ND	ND	ND	ND	ND	ND	ND	ND	ND	ND
Hexosylceramides__HexCer(d18:1/24:1)	Hexosylceramides	HexCer(d18:1/24:1)	0.672161	0.484629	0.614075	0.366411	0.856042	0.94179	-0.43585	0.490546	-0.630223	0.308619	0.138106	0.933799	1.1298	0.257527	0.335884	0.85786	0.119925	0.976527	1.57595	0.424733	0.293604	0.794066	-0.150499	0.997673	ND	ND	ND	ND	ND	ND	ND	ND	ND	ND	ND	ND	ND	ND	ND	ND	ND	ND	ND	ND	ND	ND	ND
Hexosylceramides__HexCer(d18:1/26:0)	Hexosylceramides	HexCer(d18:1/26:0)	ND	ND	0.29578	0.781258	0.697465	0.94179	ND	ND	-0.0712838	0.895984	0.127128	0.933799	ND	ND	0.1686	0.85786	-0.0290625	0.996128	ND	ND	0.251062	0.807549	-0.199826	0.997673	ND	ND	ND	ND	ND	ND	ND	ND	ND	ND	ND	ND	ND	ND	ND	ND	ND	ND	ND	ND	ND	ND	ND
Hexosylceramides__HexCer(d18:2/16:0)	Hexosylceramides	HexCer(d18:2/16:0)	0.417103	0.671843	0.357755	0.803629	0.25402	0.94179	0.0457714	0.891279	-0.0100188	0.991111	0.331373	0.895328	0.0998112	0.766701	0.24854	0.85786	-0.247111	0.976527	0.410898	0.479481	-0.211066	0.794066	-0.220216	0.997673	ND	ND	ND	ND	ND	ND	ND	ND	ND	ND	ND	ND	ND	ND	ND	ND	ND	ND	ND	ND	ND	ND	ND
Hexosylceramides__HexCer(d18:2/18:0)	Hexosylceramides	HexCer(d18:2/18:0)	0.152003	0.734944	0.191141	0.972936	0.374578	0.965729	-0.0572249	0.88711	-0.531851	0.457547	-0.227722	0.933799	0.802768	0.190557	0.321928	0.85786	-0.147754	0.976527	0.839064	0.424733	-0.138706	0.918523	-0.105933	0.997673	-0.722466	0.715796	ND	ND	ND	ND	-0.722466	0.358274	ND	ND	ND	ND	-0.174029	0.756238	ND	ND	ND	ND	0.0430687	0.94584	ND	ND	ND
Hexosylceramides__HexCer(d18:2/20:0)	Hexosylceramides	HexCer(d18:2/20:0)	0.0634143	0.877272	-0.154354	0.985602	0.140481	0.965729	-0.290879	0.260343	-0.439643	0.540102	0.246393	0.895328	0.137316	0.636558	0.15119	0.874385	-0.123545	0.976527	0.40471	0.464641	-0.507388	0.588087	-0.111687	0.997673	ND	ND	ND	ND	ND	ND	ND	ND	ND	ND	ND	ND	ND	ND	ND	ND	ND	ND	ND	ND	ND	ND	ND
Hexosylceramides__HexCer(d18:2/22:0)	Hexosylceramides	HexCer(d18:2/22:0)	0.29878	0.671843	0.00869811	0.990615	0.158528	0.965729	0.153867	0.612675	-0.0330931	0.963358	0.396538	0.893472	0.261019	0.497536	0.0652248	0.915932	-0.263075	0.976527	0.423421	0.464853	-0.494098	0.580943	-0.226732	0.997673	ND	ND	ND	ND	ND	ND	ND	ND	ND	ND	ND	ND	ND	ND	ND	ND	ND	ND	ND	ND	ND	ND	ND
Hexosylceramides__HexCer(d18:2/23:0)	Hexosylceramides	HexCer(d18:2/23:0)	0.341108	0.671843	0.299189	0.856627	0.13335	0.974836	-0.313793	0.161256	-0.263034	0.66845	0.118544	0.933799	0.34967	0.305202	0.236319	0.85786	-0.201634	0.976527	0.591204	0.434535	-0.117458	0.885379	-0.27104	0.997673	ND	ND	ND	ND	ND	ND	ND	ND	ND	ND	ND	ND	ND	ND	ND	ND	ND	ND	ND	ND	ND	ND	ND
Hexosylceramides__HexCer(d18:2/24:0)	Hexosylceramides	HexCer(d18:2/24:0)	0.765573	0.387136	0.614633	0.491395	0.571367	0.94179	0.137087	0.692944	-0.0963949	0.924028	0.480305	0.893472	0.783764	0.274637	0.0156528	0.986566	-0.0599846	0.986837	1.13082	0.424733	-0.326313	0.71944	-0.070603	0.997673	ND	ND	ND	ND	ND	ND	ND	ND	ND	ND	ND	ND	ND	ND	ND	ND	ND	ND	ND	ND	ND	ND	ND
Ioles a Derivatives__3-Iolepropionic acid	Ioles a Derivatives	3-Iolepropionic acid	ND	ND	ND	ND	ND	ND	ND	ND	ND	ND	ND	ND	ND	ND	ND	ND	ND	ND	ND	ND	ND	ND	ND	ND	ND	ND	-0.068387	0.996956	ND	ND	ND	ND	ND	ND	ND	ND	ND	ND	ND	ND	ND	ND	ND	ND	ND	ND	ND
Ioles a Derivatives__Ioxyl sulfate	Ioles a Derivatives	Ioxyl sulfate	ND	ND	ND	ND	ND	ND	ND	ND	ND	ND	ND	ND	ND	ND	ND	ND	ND	ND	ND	ND	ND	ND	ND	ND	ND	ND	ND	ND	-0.151164	0.577732	0.161155	0.706949	0.194011	0.633187	0.271194	0.521806	-0.0568459	0.937881	0.149747	0.776913	ND	ND	ND	ND	-0.00822051	0.989441	2.29217
Ioles a Derivatives__3-Ioleacetic acid	Ioles a Derivatives	3-Ioleacetic acid	ND	ND	ND	ND	ND	ND	ND	ND	ND	ND	ND	ND	ND	ND	ND	ND	ND	ND	ND	ND	ND	ND	ND	ND	ND	ND	ND	ND	ND	ND	ND	ND	ND	ND	ND	ND	ND	ND	ND	ND	ND	ND	ND	ND	-0.0349873	0.984689	ND
Ioles a Derivatives__Iole	Ioles a Derivatives	Iole	ND	ND	ND	ND	ND	ND	ND	ND	ND	ND	ND	ND	ND	ND	ND	ND	ND	ND	ND	ND	ND	ND	ND	ND	ND	ND	ND	ND	ND	ND	ND	ND	ND	ND	ND	ND	0.355716	0.58875	0.156365	0.743609	ND	ND	ND	ND	ND	ND	ND
Lysophosphatidylcholines__lysoPC a C16:0	Lysophosphatidylcholines	lysoPC a C16:0	0.456642	0.39875	-0.0145792	0.990615	0.0570933	0.985243	0.220462	0.443585	0.218061	0.502071	-0.255648	0.895328	0.526833	0.383132	0.107084	0.85786	-0.273589	0.976527	0.614275	0.479481	-0.344173	0.489845	-0.0531058	0.997673	-0.0138872	0.956565	-0.139412	0.996956	-0.0092954	0.984266	-0.193008	0.370153	-0.185427	0.576423	0.0724555	0.888214	-0.0977236	0.707084	-0.103756	0.725619	0.023248	0.997151	-0.124685	0.715497	-0.238045	0.959756	-0.0429641
Lysophosphatidylcholines__lysoPC a C16:1	Lysophosphatidylcholines	lysoPC a C16:1	0.829952	0.387136	0.00826331	0.990615	-0.0194436	0.985243	1.2259	0.0299716	0.973005	0.152728	-0.227552	0.895328	0.429237	0.435144	0.475889	0.85786	-0.837605	0.976527	1.04838	0.432565	ND	ND	-0.234352	0.997673	0.324429	0.746672	-0.393208	0.996956	0.0690715	0.89871	0.280692	0.451736	-0.0770031	0.782939	0.187316	0.730606	-0.223616	0.56387	-0.516503	0.725619	-0.0990798	0.997151	-0.060819	0.866263	-0.267841	0.984689	0.115477
Lysophosphatidylcholines__lysoPC a C17:0	Lysophosphatidylcholines	lysoPC a C17:0	0.332209	0.671843	0.117523	0.960768	0.192005	0.965729	0.156621	0.637614	0.270115	0.6285	0.0496771	0.973119	0.570062	0.341591	0.139438	0.85786	-0.123497	0.976527	0.523794	0.458399	0.0736811	0.909859	0.00638362	0.997673	-0.0971437	0.81536	0.0536261	0.996956	0.204947	0.518407	-0.227225	0.358274	-0.258174	0.488482	0.0677446	0.764405	0.0375919	0.869506	-0.0054196	0.97733	0.114944	0.997151	-0.0675737	0.811053	0.144029	0.984689	0.0726995
Lysophosphatidylcholines__lysoPC a C18:0	Lysophosphatidylcholines	lysoPC a C18:0	0.587571	0.427202	0.180369	0.776034	0.369795	0.94179	0.355066	0.274999	0.326947	0.49671	0.128385	0.918129	0.38776	0.449385	0.178739	0.85786	-0.186906	0.976527	0.375738	0.517469	-0.216331	0.594577	-0.136076	0.997673	-0.26151	0.746672	-0.19595	0.996956	0.0923871	0.630491	-0.196572	0.358274	-0.292016	0.576423	0.00483689	0.990479	-0.167106	0.411432	-0.111676	0.788326	-0.135492	0.997151	-0.277873	0.522326	-0.400957	0.979588	0.0331584
Lysophosphatidylcholines__lysoPC a C18:1	Lysophosphatidylcholines	lysoPC a C18:1	0.960305	0.387136	0.155506	0.960768	0.17242	0.974836	0.791741	0.0865157	0.666468	0.310696	0.11802	0.950143	0.579424	0.381808	-0.0469869	0.944283	-0.52144	0.976527	0.736966	0.458399	-0.359067	0.691403	-0.103992	0.997673	-0.000649424	0.997602	-0.167388	0.996956	0.0155573	0.974683	-0.0712012	0.813559	-0.248007	0.469276	-0.0582038	0.911494	-0.113423	0.803965	-0.261639	0.725619	-0.0241228	0.997151	-0.161993	0.715497	0.0431434	0.984689	-0.0027629
Lysophosphatidylcholines__lysoPC a C18:2	Lysophosphatidylcholines	lysoPC a C18:2	0.804529	0.387136	0.258553	0.881429	0.213956	0.974836	1.16348	0.102652	1.01063	0.177656	0.282531	0.918129	0.688445	0.397815	0.142869	0.871707	-0.548023	0.976527	0.712551	0.458399	-0.280803	0.737028	-0.0545893	0.997673	-0.22624	0.746672	-0.317008	0.996956	0.0492524	0.8878	-0.105962	0.747326	-0.301091	0.576423	-0.0603046	0.911698	-0.138272	0.800978	-0.253526	0.725619	-0.105997	0.997151	-0.34832	0.56576	-0.312193	0.984689	0.0158394
Lysophosphatidylcholines__lysoPC a C20:4	Lysophosphatidylcholines	lysoPC a C20:4	0.800943	0.387136	0.279346	0.800853	0.108499	0.980376	1.18269	0.0592808	0.839627	0.152728	0.292317	0.895328	0.268002	0.593411	-0.0285122	0.953021	-0.310153	0.976527	0.354828	0.526982	-0.408388	0.506252	-0.117011	0.997673	-0.286172	0.746672	-0.14154	0.996956	-0.00767578	0.974683	-0.290593	0.431639	-0.371363	0.576423	-0.13639	0.642446	-0.305281	0.510344	-0.189769	0.741424	-0.0941769	0.997151	-0.484124	0.522326	-0.479616	0.979588	-0.225528
Lysophosphatidylcholines__lysoPC a C26:1	Lysophosphatidylcholines	lysoPC a C26:1	ND	ND	-0.435599	0.488966	-0.157721	0.972143	ND	ND	-0.487606	0.317191	-0.260236	0.918129	ND	ND	-0.0661424	0.915932	-0.249095	0.976527	ND	ND	ND	ND	-0.234374	0.997673	ND	ND	ND	ND	0.132894	0.737445	0.288345	0.506381	0.641465	0.51063	ND	ND	0.131106	0.803965	0.0765129	0.879512	ND	ND	0.0867116	0.915968	-0.287761	0.984689	0.286051
Lysophosphatidylcholines__lysoPC a C28:1	Lysophosphatidylcholines	lysoPC a C28:1	0.17585	0.699297	-0.22094	0.788168	-0.248845	0.94179	ND	ND	-0.34832	0.310696	-0.349449	0.895328	-0.218835	0.462129	0.0736373	0.888992	-0.467712	0.976527	-0.071191	0.804362	-0.448846	0.434119	-0.215593	0.997673	ND	ND	-0.327041	0.996956	ND	ND	0.142768	0.67122	-0.0661424	0.868951	ND	ND	0.125531	0.820274	ND	ND	ND	ND	0.215168	0.715497	-0.163136	0.984689	ND
Lysophosphatidylcholines__lysoPC a C20:3	Lysophosphatidylcholines	lysoPC a C20:3	ND	ND	ND	ND	ND	ND	ND	ND	ND	ND	ND	ND	ND	ND	ND	ND	ND	ND	ND	ND	ND	ND	ND	ND	0.422834	0.746672	-0.212225	0.996956	-0.0879395	0.895729	1.22299	0.0731187	0.606946	0.390946	-0.120729	0.853255	-0.149622	0.779086	-0.21456	0.725619	ND	ND	-0.0937911	0.878245	0.151278	0.984689	-0.192986
Nucleobases a Related__Hypoxanthine	Nucleobases a Related	Hypoxanthine	1.44647	0.387136	1.16487	0.400051	-0.127808	0.980376	2.13963	0.0299716	2.21715	0.0346772	0.601441	0.895328	1.11387	0.285288	-0.0774139	0.96189	-0.522795	0.976527	0.645312	0.517469	-0.240022	0.885379	-0.215367	0.997673	-0.324091	0.715796	-0.123928	0.996956	-0.426515	0.50152	-0.131107	0.573166	-0.315964	0.576423	-0.136791	0.723245	0.157467	0.411771	-0.0321008	0.948901	-0.247705	0.997151	-0.21724	0.532473	-0.307693	0.984689	-0.0698104
Nucleobases a Related__Xanthine	Nucleobases a Related	Xanthine	0.744971	0.427202	0.495469	0.800853	-0.177101	0.974836	1.08199	0.0299716	1.00613	0.117672	0.411744	0.895328	0.959549	0.324873	-0.199815	0.85786	-0.304553	0.976527	0.431298	0.58716	-0.493917	0.593033	-0.174267	0.997673	-0.312356	0.715796	-0.286974	0.996956	-0.208768	0.546862	-0.179453	0.394067	-0.521397	0.133192	-0.105692	0.703687	0.0925758	0.707084	-0.154091	0.725619	-0.190497	0.997151	-0.0442074	0.890979	-0.361456	0.959756	-0.0120909
Phosphatidylcholines__PC aa C28:1	Phosphatidylcholines	PC aa C28:1	ND	ND	-0.0676109	0.985602	0.0683371	0.980376	ND	ND	0.15374	0.49671	-0.0911011	0.933799	ND	ND	0.436603	0.85786	-0.241661	0.976527	ND	ND	0.017278	0.983759	-0.0271702	0.997673	ND	ND	ND	ND	ND	ND	ND	ND	ND	ND	ND	ND	ND	ND	ND	ND	ND	ND	ND	ND	ND	ND	ND
Phosphatidylcholines__PC aa C30:0	Phosphatidylcholines	PC aa C30:0	0.964511	0.387136	0.769111	0.366411	0.160399	0.965729	1.18057	0.0299716	1.13597	0.169529	0.239596	0.895328	0.385341	0.356262	0.273243	0.85786	-0.483669	0.976527	0.643043	0.435323	0.0703612	0.932964	-0.288697	0.997673	ND	ND	ND	ND	ND	ND	ND	ND	ND	ND	ND	ND	ND	ND	ND	ND	ND	ND	ND	ND	ND	ND	ND
Phosphatidylcholines__PC aa C30:2	Phosphatidylcholines	PC aa C30:2	0.521237	0.620641	-0.118644	0.960768	0.146841	0.974836	0.233797	0.479536	-0.2367	0.66845	-0.0848889	0.973119	-0.169925	0.744241	0.0281969	0.959259	-0.347923	0.976527	0.39486	0.463261	-0.365284	0.588087	0.040642	0.997673	-0.31259	0.746672	-0.550197	0.996956	0.235378	0.58442	0.333126	0.358274	0.0347654	0.930536	-0.133856	0.738122	0.225067	0.427581	-0.207805	0.725619	0.155651	0.997151	0.303069	0.56576	-0.426815	0.979588	0.325576
Phosphatidylcholines__PC aa C32:0	Phosphatidylcholines	PC aa C32:0	0.771141	0.394992	0.533569	0.490794	-0.00387381	0.98947	0.781157	0.0315595	0.579928	0.421787	0.0894221	0.938311	0.333012	0.355724	0.199696	0.85786	-0.399253	0.976527	0.500317	0.442922	-0.238705	0.691403	-0.438236	0.997673	-0.585983	0.715796	-0.225594	0.996956	-0.231061	0.58442	0.409759	0.451736	0.331333	0.633187	-0.658911	0.521806	-0.268757	0.538939	0.0349938	0.971094	-0.22355	0.997151	-0.4742	0.522973	-0.794254	0.583241	-0.150454
Phosphatidylcholines__PC aa C32:1	Phosphatidylcholines	PC aa C32:1	0.975831	0.387136	0.522055	0.493557	-0.0850976	0.980376	1.25233	0.0299716	0.996961	0.201592	0.0697333	0.970057	0.12774	0.742717	0.113635	0.886099	-0.500135	0.976527	0.560557	0.464641	-0.0796704	0.932964	-0.338667	0.997673	0.134981	0.746672	ND	ND	-0.357872	0.50152	0.465762	0.358274	-0.127281	0.812237	-0.328163	0.521806	-0.391959	0.308432	-0.257001	0.766152	-0.418539	0.997151	-0.197433	0.715497	-0.466318	0.984689	-0.433948
Phosphatidylcholines__PC aa C32:2	Phosphatidylcholines	PC aa C32:2	0.674374	0.484629	0.688535	0.366411	0.109005	0.974836	0.851755	0.0299716	0.85772	0.204182	0.143896	0.928971	0.197052	0.620132	0.21443	0.85786	-0.379548	0.976527	0.55241	0.458399	0.183616	0.832612	-0.176157	0.997673	0.234091	0.746672	-0.149056	0.996956	-0.25283	0.50152	0.30841	0.394067	-0.108732	0.81209	-0.0741591	0.905982	0.210059	0.540043	-0.188857	0.787449	-0.303969	0.997151	0.142253	0.741665	-0.266579	0.984689	-0.0949177
Phosphatidylcholines__PC aa C32:3	Phosphatidylcholines	PC aa C32:3	0.312121	0.671843	0.473516	0.491395	-0.0672747	0.980376	0.37573	0.140551	0.648692	0.145326	0.165424	0.918129	0.214784	0.527846	-0.00259711	0.998034	-0.290256	0.976527	0.481475	0.424733	-0.126475	0.867977	-0.0375634	0.997673	-0.0542902	0.857992	-0.201234	0.996956	-0.0535155	0.60525	0.0122436	0.934011	0.162356	0.576423	0.0593785	0.764405	-0.0030772	0.995591	-0.118644	0.788326	-0.0598201	0.997151	-0.151093	0.534988	-0.276687	0.984689	-3.20343e-16
Phosphatidylcholines__PC aa C34:1	Phosphatidylcholines	PC aa C34:1	0.688467	0.47725	0.340844	0.781258	0.215271	0.965729	0.00967235	0.970411	-0.26384	0.716866	0.173519	0.918129	0.450506	0.325672	0.0419509	0.946823	-0.330224	0.976527	0.610704	0.424733	-0.084251	0.927401	-0.272871	0.997673	ND	ND	ND	ND	-0.291565	0.69174	0.495484	0.504652	-0.261897	0.622058	ND	ND	-0.0881602	0.917763	0.0346526	0.97733	-0.318037	0.997151	ND	ND	-0.511057	0.984689	-0.678423
Phosphatidylcholines__PC aa C34:2	Phosphatidylcholines	PC aa C34:2	0.488562	0.671843	0.49304	0.465667	0.117547	0.972143	0.212576	0.470145	0.0397604	0.958989	0.124818	0.933799	0.343857	0.425762	0.156825	0.85786	-0.390315	0.976527	0.644657	0.424733	0.0584356	0.932964	-0.263804	0.997673	-0.128055	0.746672	-0.207254	0.996956	-0.218624	0.509047	0.366527	0.447619	-0.0615692	0.843195	0.109414	0.92838	0.0408706	0.879892	-0.112596	0.896603	-0.169055	0.997151	-0.0193324	0.94584	-0.242474	0.984689	-0.308855
Phosphatidylcholines__PC aa C34:3	Phosphatidylcholines	PC aa C34:3	0.73073	0.484629	0.422124	0.665119	0.0436132	0.985243	0.867026	0.0353897	0.55127	0.432581	0.0459546	0.973119	0.348386	0.431016	0.110038	0.879044	-0.339749	0.976527	0.745495	0.424733	-0.00735133	0.999328	-0.216768	0.997673	0.231769	0.715796	-0.275437	0.996956	-0.0859702	0.739654	0.489856	0.148147	0.385136	0.449694	-0.00694272	0.990479	-0.0436811	0.779086	-0.178436	0.743609	-0.274578	0.997151	-0.0211056	0.938056	-0.13921	0.984689	-0.14563
Phosphatidylcholines__PC aa C34:4	Phosphatidylcholines	PC aa C34:4	0.798009	0.387136	0.659326	0.366411	-0.0225994	0.985243	0.780798	0.0299716	0.666213	0.309171	0.0397338	0.973119	0.276132	0.501396	0.217387	0.85786	-0.452512	0.976527	0.592949	0.435323	0.0314521	0.982712	-0.219608	0.997673	0.0458236	0.746672	0.0341839	0.996956	-0.13001	0.63951	0.369851	0.11361	0.381066	0.122027	0.124755	0.65133	-0.167535	0.344428	-0.189644	0.725619	-0.161638	0.997151	-0.0955777	0.629834	0.130891	0.984689	-0.192455
Phosphatidylcholines__PC aa C36:0	Phosphatidylcholines	PC aa C36:0	0.0104095	0.974872	0.619679	0.384526	0.184282	0.965729	0.0765355	0.805752	0.232328	0.636104	0.172174	0.918129	-0.0544095	0.840649	-0.0679973	0.892018	-0.0647972	0.982198	0.442875	0.458399	-0.160266	0.834185	-0.242335	0.997673	ND	ND	ND	ND	ND	ND	ND	ND	ND	ND	ND	ND	ND	ND	ND	ND	ND	ND	ND	ND	ND	ND	ND
Phosphatidylcholines__PC aa C36:1	Phosphatidylcholines	PC aa C36:1	0.774805	0.387136	0.308968	0.781258	0.19805	0.965729	0.18158	0.457159	-0.0632376	0.936323	0.213701	0.895328	0.561391	0.266435	0.0833172	0.888992	-0.312034	0.976527	0.611701	0.424733	-0.0812725	0.922757	-0.201129	0.997673	-0.395079	0.746672	ND	ND	-0.229852	0.546862	0.400096	0.451736	-0.103373	0.81209	ND	ND	0.00106774	0.998802	-0.0568483	0.962228	-0.351882	0.997151	-0.458245	0.56576	-0.454794	0.984689	-0.323313
Phosphatidylcholines__PC aa C36:2	Phosphatidylcholines	PC aa C36:2	0.80706	0.387136	0.55666	0.379377	0.155278	0.965729	0.504033	0.0584878	0.327842	0.644396	0.220447	0.895328	0.501386	0.324873	0.186292	0.85786	-0.395375	0.976527	0.796194	0.424733	0.132521	0.834185	-0.205785	0.997673	-0.431036	0.715796	-0.237939	0.996956	0.0521164	0.906745	0.563765	0.358274	0.0423274	0.87321	0.255883	0.782744	-0.113127	0.755083	-0.0201859	0.97733	-0.261201	0.997151	-0.149098	0.734582	-0.166778	0.984689	-0.0233373
Phosphatidylcholines__PC aa C36:3	Phosphatidylcholines	PC aa C36:3	0.578332	0.532568	0.627981	0.366411	0.0179023	0.985243	0.321797	0.217908	0.258333	0.749508	0.0419463	0.97413	0.325158	0.414638	0.183421	0.85786	-0.468956	0.976527	0.734045	0.424733	0.018022	0.993623	-0.162658	0.997673	ND	ND	ND	ND	0.00823458	0.984266	0.777456	0.358274	0.491493	0.349164	ND	ND	-0.00212765	0.998802	0.00126586	0.998049	ND	ND	0.111594	0.876487	0.64364	0.984689	-0.312599
Phosphatidylcholines__PC aa C36:4	Phosphatidylcholines	PC aa C36:4	0.656531	0.484629	0.559713	0.400051	-0.0540875	0.984885	0.228623	0.373694	0.0396115	0.958989	-0.0971399	0.938311	0.245646	0.501396	0.157838	0.85786	-0.334408	0.976527	0.395738	0.463261	-0.152756	0.816706	-0.324924	0.997673	-0.162133	0.746672	-0.0259592	0.996956	-0.189796	0.50152	0.0810261	0.706949	0.0864148	0.807322	-0.189796	0.521806	-0.128033	0.593063	-0.143453	0.733695	-0.268052	0.997151	-0.135338	0.65114	0.170585	0.984689	-0.353576
Phosphatidylcholines__PC aa C36:5	Phosphatidylcholines	PC aa C36:5	0.710866	0.484629	0.461001	0.675109	-0.0700026	0.980376	0.387474	0.121968	0.252003	0.763332	0.11518	0.933799	0.10883	0.75901	0.159245	0.85786	-0.499367	0.976527	0.505405	0.458399	-0.149737	0.869352	-0.24688	0.997673	0.297178	0.715796	-0.149291	0.996956	-0.201091	0.50152	0.585885	0.11361	0.537409	0.117463	-0.0621292	0.867638	-0.126237	0.405663	-0.184718	0.725619	-0.207884	0.997151	0.114204	0.632469	0.361605	0.984689	-0.282526
Phosphatidylcholines__PC aa C36:6	Phosphatidylcholines	PC aa C36:6	0.577499	0.579067	0.542879	0.634161	-0.00734946	0.98947	0.236362	0.376461	0.0705495	0.924028	0.0131354	0.989816	0.203768	0.563491	0.0241775	0.971862	-0.342602	0.976527	0.589422	0.424733	-0.0513469	0.964904	-0.238611	0.997673	0.0584349	0.831426	0.00232131	0.996956	0.0124478	0.974683	0.293671	0.11361	0.390436	0.0206714	0.299248	0.521806	-0.0395284	0.874488	-0.103524	0.733695	-0.0902785	0.997151	0.0889462	0.66278	-0.108524	0.984689	-0.0593365
Phosphatidylcholines__PC aa C38:0	Phosphatidylcholines	PC aa C38:0	0.360564	0.671843	0.666307	0.366411	0.0377233	0.985243	0.026069	0.934609	0.0963422	0.904894	0.149948	0.928971	0.165618	0.590305	0.0975679	0.85786	-0.46909	0.976527	0.54984	0.424733	-0.133838	0.832612	-0.26064	0.997673	ND	ND	ND	ND	ND	ND	ND	ND	ND	ND	ND	ND	ND	ND	ND	ND	ND	ND	ND	ND	ND	ND	ND
Phosphatidylcholines__PC aa C38:1	Phosphatidylcholines	PC aa C38:1	0.986285	0.39875	0.711379	0.366411	0.321267	0.94179	1.14421	0.0299716	0.544383	0.421787	0.10517	0.948142	0.612627	0.320126	0.223737	0.85786	-0.103574	0.976527	0.297687	0.651433	-0.293054	0.725678	-0.383428	0.997673	ND	ND	ND	ND	ND	ND	ND	ND	ND	ND	ND	ND	ND	ND	ND	ND	ND	ND	ND	ND	ND	ND	ND
Phosphatidylcholines__PC aa C38:3	Phosphatidylcholines	PC aa C38:3	0.808662	0.387136	0.647804	0.366411	0.0184113	0.985243	0.616444	0.0353897	0.472749	0.49671	0.1067	0.938311	0.48337	0.325672	0.270089	0.85786	-0.455236	0.976527	0.683131	0.424733	0.214813	0.737028	-0.383778	0.997673	ND	ND	ND	ND	0.496478	0.554678	1.50689	0.338702	1.29369	0.40352	ND	ND	0.211674	0.874488	0.387771	0.788326	ND	ND	ND	ND	0.271484	0.984689	0.61596
Phosphatidylcholines__PC aa C38:4	Phosphatidylcholines	PC aa C38:4	0.779924	0.387136	0.525522	0.465667	0.0356239	0.985243	0.356818	0.122936	0.0747181	0.924132	0.13921	0.929647	0.46443	0.278617	0.115036	0.85786	-0.380391	0.976527	0.491336	0.435323	-0.157573	0.781739	-0.302337	0.997673	-0.492826	0.715796	-0.0604406	0.996956	0.066523	0.906745	0.233923	0.537868	0.0392179	0.902454	-0.229838	0.709409	-0.0396088	0.930415	-0.287015	0.725619	-0.336632	0.997151	-0.285493	0.56576	-0.0922027	0.984689	-0.074363
Phosphatidylcholines__PC aa C38:5	Phosphatidylcholines	PC aa C38:5	0.903436	0.387136	0.803964	0.366411	-0.0231673	0.985243	0.330415	0.194491	0.272578	0.730516	0.027173	0.979948	0.207294	0.531288	0.159961	0.85786	-0.43926	0.976527	0.481082	0.435323	-0.118353	0.885379	-0.300587	0.997673	0.0741818	0.869811	0.0253163	0.996956	-0.105532	0.69961	0.300854	0.358274	0.422738	0.478945	-0.218385	0.521806	-0.0891792	0.779086	-0.146142	0.766152	-0.228819	0.997151	0.0985687	0.782632	0.672344	0.984689	-0.340036
Phosphatidylcholines__PC aa C38:6	Phosphatidylcholines	PC aa C38:6	0.598569	0.427202	0.438017	0.776034	0.0142568	0.985243	0.23629	0.381268	-0.107545	0.904894	0.0223127	0.979948	0.271623	0.383132	-0.147573	0.85786	-0.345754	0.976527	0.477702	0.424733	-0.556687	0.514327	-0.392268	0.997673	-0.307655	0.746672	0.0145226	0.996956	-0.109493	0.730045	0.25475	0.358274	0.645834	0.105571	-0.163837	0.585422	-0.21094	0.452634	-0.033417	0.914215	-0.256479	0.997151	-0.197821	0.669757	-0.354363	0.51579	-0.621561
Phosphatidylcholines__PC aa C40:2	Phosphatidylcholines	PC aa C40:2	0.985997	0.387136	0.817475	0.366411	0.128768	0.965729	0.839988	0.0299716	0.468904	0.421787	0.195724	0.895328	0.415771	0.342687	0.0837684	0.85786	-0.276184	0.976527	0.504268	0.424733	-0.0850473	0.885379	-0.1871	0.997673	ND	ND	ND	ND	ND	ND	ND	ND	ND	ND	ND	ND	ND	ND	ND	ND	ND	ND	ND	ND	ND	ND	ND
Phosphatidylcholines__PC aa C40:3	Phosphatidylcholines	PC aa C40:3	0.792357	0.387136	0.741478	0.366411	0.0630271	0.981523	0.759974	0.040941	0.605899	0.310696	0.0937751	0.938311	0.463551	0.31924	0.104048	0.85786	-0.359964	0.976527	0.448851	0.458399	0.103522	0.85749	-0.24609	0.997673	-0.019164	0.956565	-0.025091	0.996956	0	1	0.498493	0.236225	0.529175	0.236944	ND	ND	-0.287577	0.461968	0.155481	0.733695	-0.0614449	0.997151	-0.019164	0.94584	0.258363	0.984689	-0.0571954
Phosphatidylcholines__PC aa C40:4	Phosphatidylcholines	PC aa C40:4	0.760768	0.387136	0.64403	0.366411	-0.0310405	0.985243	0.351431	0.0991263	0.10894	0.894876	0.0486798	0.973119	0.41087	0.296235	0.188615	0.85786	-0.459071	0.976527	0.385907	0.458399	-0.105024	0.868539	-0.379138	0.997673	-0.429621	0.746672	-0.1457	0.996956	-0.0480409	0.921857	0.335544	0.51145	0.0774788	0.853539	-0.229409	0.689135	-0.0782616	0.874488	0.0591779	0.930007	-0.224494	0.997151	-0.293832	0.575524	-0.103093	0.984689	-0.212278
Phosphatidylcholines__PC aa C40:5	Phosphatidylcholines	PC aa C40:5	0.95007	0.387136	0.831432	0.366411	-0.0812208	0.980376	0.39779	0.0928506	0.26272	0.730864	0.00468408	0.999071	0.345765	0.355724	0.130362	0.85786	-0.458162	0.976527	0.512936	0.435323	0.00188711	0.999328	-0.384859	0.997673	-0.490784	0.715796	-0.0818383	0.996956	-0.0629578	0.906745	0.454592	0.358274	0.35216	0.576423	-0.371039	0.559176	-0.0494156	0.890417	-0.0300126	0.963741	-0.65708	0.997151	-0.322947	0.56576	-0.0978697	0.984689	-0.456645
Phosphatidylcholines__PC aa C40:6	Phosphatidylcholines	PC aa C40:6	0.724233	0.387136	0.602804	0.437179	0.0131434	0.985243	0.319039	0.122936	0.00105385	0.997897	0.064972	0.962181	0.375274	0.281631	0.0317338	0.962995	-0.375105	0.976527	0.517081	0.424733	-0.300319	0.67394	-0.365717	0.997673	-0.51309	0.715796	-0.0591682	0.996956	-0.167217	0.69174	0.237923	0.514171	0.123058	0.691446	-0.484315	0.521806	-0.0934721	0.846646	-0.0588251	0.917184	-0.575818	0.997151	-0.323536	0.56576	-0.517494	0.979588	-0.557088
Phosphatidylcholines__PC aa C42:1	Phosphatidylcholines	PC aa C42:1	0.425068	0.427202	0.572435	0.366411	0.61227	0.94179	-0.0362391	0.875445	-0.209973	0.632952	0.254201	0.895328	0.689212	0.218458	0.370976	0.85786	0.135832	0.976527	1.00892	0.424733	0.146171	0.832612	0.0933965	0.997673	ND	ND	ND	ND	ND	ND	ND	ND	ND	ND	ND	ND	ND	ND	ND	ND	ND	ND	ND	ND	ND	ND	ND
Phosphatidylcholines__PC aa C42:4	Phosphatidylcholines	PC aa C42:4	0.711701	0.387136	0.612525	0.366411	-0.0998823	0.972143	0.225743	0.241517	-0.0376635	0.958989	-0.0272112	0.979948	0.50725	0.25737	0.215013	0.85786	-0.440419	0.976527	0.418945	0.458399	-0.0343201	0.97389	-0.364882	0.997673	ND	ND	ND	ND	ND	ND	ND	ND	ND	ND	ND	ND	ND	ND	ND	ND	ND	ND	ND	ND	ND	ND	ND
Phosphatidylcholines__PC aa C42:5	Phosphatidylcholines	PC aa C42:5	0.740043	0.387136	0.678947	0.366411	-0.10131	0.972143	0.296026	0.175277	0.0779104	0.923679	-0.0539284	0.973119	0.357427	0.334741	0.0702227	0.888992	-0.549624	0.976527	0.335894	0.490932	-0.0893232	0.885379	-0.361527	0.997673	-0.208587	0.746672	-0.36257	0.996956	ND	ND	ND	ND	ND	ND	ND	ND	0.141911	0.558355	0.0985638	0.89817	ND	ND	ND	ND	0.053638	0.984689	ND
Phosphatidylcholines__PC aa C42:6	Phosphatidylcholines	PC aa C42:6	0.719361	0.387136	0.661895	0.366411	-0.0366469	0.985243	0.325226	0.0716191	0.335831	0.419413	0.000393266	1	0.280173	0.369762	0.276052	0.85786	-0.458154	0.976527	0.528672	0.366526	-0.076275	0.921922	-0.323109	0.997673	ND	ND	ND	ND	ND	ND	ND	ND	ND	ND	ND	ND	ND	ND	ND	ND	ND	ND	ND	ND	ND	ND	ND
Phosphatidylcholines__PC ae C30:0	Phosphatidylcholines	PC ae C30:0	ND	ND	ND	ND	0.0204062	0.985243	ND	ND	ND	ND	-0.040642	0.933799	ND	ND	ND	ND	ND	ND	ND	ND	ND	ND	ND	ND	ND	ND	ND	ND	ND	ND	ND	ND	ND	ND	ND	ND	ND	ND	ND	ND	ND	ND	ND	ND	ND	ND	ND
Phosphatidylcholines__PC ae C30:1	Phosphatidylcholines	PC ae C30:1	0.0138058	0.974872	0.460448	0.800853	0.0424353	0.985243	0.484436	0.121476	0.71158	0.34733	0.345422	0.895328	0.106915	0.771851	0.520154	0.85786	-0.519195	0.976527	0.349409	0.517469	-0.104337	0.922757	-0.297905	0.997673	0.782409	0.715796	ND	ND	0.133267	0.829938	0.464668	0.370153	0.908078	0.153239	ND	ND	0.15056	0.780436	0.49304	0.725619	ND	ND	ND	ND	0.467505	0.984689	0.255257
Phosphatidylcholines__PC ae C30:2	Phosphatidylcholines	PC ae C30:2	ND	ND	0.163499	0.960768	ND	ND	0.0995357	0.805752	-0.120294	0.856921	ND	ND	0.169925	0.581197	ND	ND	ND	ND	0.280108	0.568738	0	1	ND	ND	ND	ND	ND	ND	ND	ND	ND	ND	ND	ND	ND	ND	ND	ND	ND	ND	ND	ND	ND	ND	ND	ND	ND
Phosphatidylcholines__PC ae C32:1	Phosphatidylcholines	PC ae C32:1	0.281105	0.672635	0.836825	0.366411	0.143691	0.965729	0.47571	0.158107	0.950602	0.225578	0.515366	0.885223	-0.0862055	0.832087	0.224631	0.85786	-0.423788	0.976527	0.342541	0.517469	-0.0983799	0.909859	-0.42805	0.997673	ND	ND	ND	ND	ND	ND	0.372333	0.415833	ND	ND	ND	ND	ND	ND	ND	ND	ND	ND	ND	ND	ND	ND	ND
Phosphatidylcholines__PC ae C32:2	Phosphatidylcholines	PC ae C32:2	0.154921	0.776794	0.579878	0.49674	0.180695	0.965729	0.400361	0.266058	0.641444	0.372243	0.500776	0.885223	-0.243599	0.59848	0.0904586	0.898205	-0.496454	0.976527	0.291231	0.60499	-0.0768259	0.932964	-0.298193	0.997673	ND	ND	ND	ND	ND	ND	ND	ND	ND	ND	ND	ND	ND	ND	ND	ND	ND	ND	ND	ND	ND	ND	ND
Phosphatidylcholines__PC ae C34:0	Phosphatidylcholines	PC ae C34:0	0.703909	0.387136	0.525283	0.400051	0.029244	0.985243	0.751832	0.033333	0.413339	0.510955	0.0193927	0.980492	0.507672	0.291308	0.19948	0.85786	-0.369855	0.976527	0.699427	0.424733	0.0235685	0.983759	-0.400384	0.997673	ND	ND	ND	ND	ND	ND	0.642206	0.358274	0.322332	0.576423	ND	ND	0.296982	0.380049	ND	ND	ND	ND	ND	ND	ND	ND	ND
Phosphatidylcholines__PC ae C34:1	Phosphatidylcholines	PC ae C34:1	0.627868	0.427202	0.617157	0.366411	0.247016	0.94179	0.424044	0.140636	0.338023	0.636104	0.265545	0.895328	0.404576	0.369177	0.158094	0.85786	-0.38018	0.976527	0.733626	0.424733	0.105569	0.885379	-0.288011	0.997673	ND	ND	ND	ND	-0.182562	0.63951	0.46106	0.396747	0.115919	0.772961	ND	ND	0.0742246	0.890417	0.195038	0.840627	-0.348262	0.997151	ND	ND	-0.158475	0.984689	-0.421264
Phosphatidylcholines__PC ae C34:2	Phosphatidylcholines	PC ae C34:2	-0.00211953	0.995622	0.485009	0.47928	0.644519	0.94179	-0.710269	0.194491	-0.489377	0.419626	0.769494	0.885223	0.144003	0.75901	0.131372	0.85786	-0.352063	0.976527	0.493021	0.479481	0.100589	0.922757	-0.204231	0.997673	ND	ND	ND	ND	-0.0924462	0.837462	0.127429	0.848871	0.208876	0.576423	ND	ND	0.119058	0.869506	0.301442	0.733695	-0.263432	0.997151	ND	ND	0.208876	0.984689	-0.382896
Phosphatidylcholines__PC ae C34:3	Phosphatidylcholines	PC ae C34:3	-0.0836055	0.861598	0.540028	0.488966	0.315963	0.94179	-0.222358	0.566397	0.0339875	0.962645	0.496664	0.885223	0.134494	0.741091	0.159286	0.85786	-0.413621	0.976527	0.571673	0.435068	0.0472611	0.965965	-0.324969	0.997673	ND	ND	ND	ND	0.0104166	0.984266	0.040642	0.848871	0.275634	0.576423	ND	ND	0.203872	0.707084	0.250779	0.8125	ND	ND	ND	ND	ND	ND	0.0813001
Phosphatidylcholines__PC ae C36:0	Phosphatidylcholines	PC ae C36:0	ND	ND	0.0300181	0.990615	0.0121708	0.985243	ND	ND	0.101556	0.697153	-0.079156	0.895328	0.348426	0.296235	ND	ND	ND	ND	0.316758	0.424733	0.118245	0.763544	-0.249629	0.997673	ND	ND	ND	ND	ND	ND	ND	ND	ND	ND	ND	ND	ND	ND	ND	ND	ND	ND	ND	ND	ND	ND	ND
Phosphatidylcholines__PC ae C36:1	Phosphatidylcholines	PC ae C36:1	0.709943	0.387136	0.529241	0.493557	0.311686	0.94179	0.0792215	0.801165	-0.169493	0.829447	0.234272	0.895328	0.60144	0.274637	0.171429	0.85786	-0.200753	0.976527	0.738809	0.424733	0.266915	0.743646	-0.0992044	0.997673	ND	ND	ND	ND	ND	ND	ND	ND	ND	ND	ND	ND	ND	ND	ND	ND	ND	ND	ND	ND	ND	ND	ND
Phosphatidylcholines__PC ae C36:2	Phosphatidylcholines	PC ae C36:2	0.473681	0.551346	0.58781	0.366411	0.258217	0.94179	0.170922	0.525769	0.0966553	0.91917	0.328836	0.895328	0.415717	0.355724	0.20404	0.85786	-0.371584	0.976527	0.723463	0.424733	0.272302	0.714251	-0.184425	0.997673	ND	ND	ND	ND	0.267933	0.554678	0.306827	0.514253	0.0888093	0.734799	ND	ND	0.0610462	0.870769	0.0647703	0.917184	ND	ND	-0.0257376	0.938056	0.316027	0.984689	0.0857299
Phosphatidylcholines__PC ae C36:3	Phosphatidylcholines	PC ae C36:3	0.268652	0.687127	0.488082	0.491395	0.441179	0.94179	-0.159286	0.68256	-0.051488	0.95129	0.469063	0.893472	0.17785	0.691003	0.182563	0.85786	-0.360402	0.976527	0.664371	0.424733	0.24583	0.769167	-0.232464	0.997673	ND	ND	ND	ND	ND	ND	ND	ND	ND	ND	ND	ND	ND	ND	ND	ND	ND	ND	ND	ND	ND	ND	ND
Phosphatidylcholines__PC ae C36:4	Phosphatidylcholines	PC ae C36:4	0.624568	0.482011	0.726555	0.366411	0.0296091	0.985243	0.549514	0.0512368	0.498722	0.469596	0.182662	0.905426	0.20285	0.601842	0.211333	0.85786	-0.482833	0.976527	0.47735	0.442341	-0.0464643	0.951701	-0.294533	0.997673	-0.24314	0.746672	0.0691934	0.996956	-0.108634	0.671337	0.249006	0.486946	0.333635	0.576423	0.156463	0.767372	-0.105069	0.680525	0.161203	0.779109	-0.122228	0.997151	-0.212954	0.534988	0.0901531	0.984689	0.110511
Phosphatidylcholines__PC ae C36:5	Phosphatidylcholines	PC ae C36:5	0.137708	0.777909	0.60518	0.465667	0.0924683	0.974836	-0.339657	0.340845	-0.170119	0.848984	0.378687	0.893472	0.0140596	0.966815	0.135973	0.85786	-0.451817	0.976527	0.326481	0.517469	-0.0698098	0.927401	-0.333656	0.997673	ND	ND	ND	ND	-0.395186	0.682027	0.323994	0.701463	-0.120798	0.691446	ND	ND	-0.1342	0.874488	0.584963	0.725619	ND	ND	ND	ND	ND	ND	-0.439943
Phosphatidylcholines__PC ae C38:0	Phosphatidylcholines	PC ae C38:0	0.373194	0.61659	0.413154	0.665119	0.170284	0.965729	0.140352	0.179391	0.253366	0.419413	0.125127	0.918129	0.201634	0.351072	0.346194	0.85786	0.0185283	0.990931	0.5479	0.366526	-0.127855	0.804997	-0.148302	0.997673	-0.0168519	0.94638	0.0471651	0.996956	ND	ND	0.537229	0.0791902	0.678943	0.00584223	-0.0271894	0.782744	-0.169343	0.337813	-0.025504	0.914215	0.00504146	0.997151	0.0802542	0.715497	0.0702648	0.984689	ND
Phosphatidylcholines__PC ae C38:1	Phosphatidylcholines	PC ae C38:1	0.736966	0.551346	0.148619	0.990615	0.116881	0.972143	0.416083	0.364006	0.199854	0.785338	0.445902	0.893472	0.841788	0.278885	-0.189345	0.85786	-0.00813934	0.998075	0.584498	0.458399	0.0711515	0.922757	-0.249704	0.997673	ND	ND	ND	ND	ND	ND	ND	ND	ND	ND	ND	ND	ND	ND	ND	ND	ND	ND	ND	ND	ND	ND	ND
Phosphatidylcholines__PC ae C38:2	Phosphatidylcholines	PC ae C38:2	0.731183	0.39875	0.430798	0.491395	0.233438	0.965729	0.480626	0.159917	0.233386	0.781216	0.267972	0.895328	0.611557	0.341591	0.0401528	0.948174	-0.258021	0.976527	0.593437	0.435068	0.287404	0.695904	-0.0846122	0.997673	-0.455517	0.715796	0.0059739	0.996956	0.0449875	0.949522	0.345681	0.394067	-0.058021	0.719267	0.0386459	0.973247	-0.0463556	0.890417	0.253692	0.725619	-0.339442	0.997151	-0.185332	0.715497	0.134235	0.984689	-0.180572
Phosphatidylcholines__PC ae C38:3	Phosphatidylcholines	PC ae C38:3	0.559349	0.551346	0.509276	0.416872	-0.00857307	0.98947	0.221061	0.432364	0.188508	0.786081	0.127264	0.933799	0.309934	0.507714	0.344662	0.85786	-0.441794	0.976527	0.492377	0.42971	0.223273	0.691403	-0.164361	0.997673	ND	ND	ND	ND	0.175318	0.688905	ND	ND	0.258859	0.576423	ND	ND	ND	ND	0.356535	0.725619	0.292451	0.997151	ND	ND	1.03603	0.190462	0.258976
Phosphatidylcholines__PC ae C38:4	Phosphatidylcholines	PC ae C38:4	0.610131	0.427202	0.709832	0.366411	-0.0240072	0.985243	0.406049	0.0953983	0.258965	0.735829	0.0571095	0.973119	0.439472	0.322372	0.224769	0.85786	-0.381656	0.976527	0.531204	0.424733	0.116483	0.867977	-0.285909	0.997673	-0.293694	0.746672	0.171854	0.996956	0.0452306	0.913716	0.157069	0.573166	0.157845	0.633527	-0.194163	0.521806	0.0712037	0.849962	0.0735246	0.913688	-0.220493	0.997151	-0.103819	0.805697	0.407702	0.984689	-0.176873
Phosphatidylcholines__PC ae C38:5	Phosphatidylcholines	PC ae C38:5	0.498068	0.651211	0.645267	0.366411	-0.0114163	0.988328	0.322424	0.218109	0.407493	0.574818	0.319594	0.895328	0.17277	0.644634	0.199225	0.85786	-0.467692	0.976527	0.425746	0.458399	-0.0593262	0.927401	-0.260704	0.997673	ND	ND	ND	ND	-0.103951	0.785121	0.333247	0.487966	0.0474472	0.821926	ND	ND	0.0921055	0.851065	0.220198	0.766152	ND	ND	ND	ND	-0.246467	0.979588	0.03305
Phosphatidylcholines__PC ae C38:6	Phosphatidylcholines	PC ae C38:6	0.237699	0.687127	0.657259	0.465667	0.0301166	0.985243	-0.308668	0.36166	-0.00944847	0.991111	0.269327	0.895328	-0.0477641	0.902768	0.0684797	0.915932	-0.484111	0.976527	0.382297	0.485912	0.00400193	0.999328	-0.338681	0.997673	ND	ND	ND	ND	-0.243689	0.50152	0.204416	0.487966	0.188687	0.58216	-0.104037	0.810254	-0.0961627	0.779086	0.222957	0.741962	-0.224891	0.997151	-0.280834	0.522326	-0.588921	0.583241	-0.571542
Phosphatidylcholines__PC ae C40:1	Phosphatidylcholines	PC ae C40:1	0.496637	0.387136	0.554155	0.491395	0.0951118	0.974836	0.282626	0.231468	0.0908507	0.893474	-0.0489096	0.973119	0.30748	0.341591	0.0747648	0.900364	-0.162131	0.976527	0.50868	0.424733	-0.399397	0.54248	-0.298081	0.997673	-0.182144	0.746672	-0.0178598	0.996956	0.0722703	0.895729	0.844012	0.099884	0.819073	0.0118842	-0.160644	0.730606	0.117524	0.707084	-0.0653572	0.800372	-0.0392961	0.997151	0.170707	0.715497	-0.033398	0.984689	-0.283396
Phosphatidylcholines__PC ae C40:2	Phosphatidylcholines	PC ae C40:2	0.415585	0.484629	0.256934	0.787395	0.0870451	0.972143	0.0410068	0.783981	-0.0448222	0.923679	-0.0175347	0.984276	0.322366	0.355724	0.315828	0.85786	-0.174774	0.976527	0.417225	0.435323	-0.239128	0.588087	0.00965017	0.997673	ND	ND	ND	ND	ND	ND	ND	ND	ND	ND	ND	ND	ND	ND	ND	ND	ND	ND	ND	ND	ND	ND	ND
Phosphatidylcholines__PC ae C40:3	Phosphatidylcholines	PC ae C40:3	0.252009	0.671843	0.189034	0.817167	-0.410268	0.94179	ND	ND	-0.0687897	0.873434	-0.137742	0.893472	0.24706	0.478644	0.341986	0.85786	-0.609048	0.976527	0.502639	0.424733	0.118526	0.86028	-0.473533	0.997673	ND	ND	ND	ND	ND	ND	-0.0606264	0.874438	ND	ND	ND	ND	-0.33985	0.380557	ND	ND	ND	ND	0.0610294	0.921621	ND	ND	ND
Phosphatidylcholines__PC ae C40:4	Phosphatidylcholines	PC ae C40:4	0.545073	0.467677	0.55619	0.366411	0.0458297	0.984885	0.310423	0.196271	0.0995049	0.884811	0.0980382	0.938311	0.402377	0.341591	0.240688	0.85786	-0.236178	0.976527	0.443826	0.435323	0.0179048	0.983759	-0.189441	0.997673	-0.310648	0.715796	0.0487674	0.996956	-0.0759721	0.7769	0.220515	0.39263	0.0974363	0.691446	-0.303029	0.521806	-0.00726571	0.977445	0.087306	0.869353	-0.282582	0.997151	-0.189994	0.611781	0.231582	0.984689	-0.161237
Phosphatidylcholines__PC ae C40:5	Phosphatidylcholines	PC ae C40:5	0.632644	0.427202	0.655101	0.366411	0.0131112	0.985243	0.330224	0.183966	0.272284	0.705334	0.069112	0.958479	0.246298	0.497536	0.188785	0.85786	-0.442422	0.976527	0.410037	0.458399	0.0125004	0.999328	-0.232226	0.997673	ND	ND	ND	ND	ND	ND	0.247453	0.419337	ND	ND	ND	ND	0.227014	0.40078	ND	ND	ND	ND	0.120238	0.632949	ND	ND	ND
Phosphatidylcholines__PC ae C40:6	Phosphatidylcholines	PC ae C40:6	0.396346	0.671843	0.742986	0.366411	-0.0293758	0.985243	0.133359	0.612675	0.277601	0.668786	0.110054	0.933799	0.0194665	0.954507	0.207486	0.85786	-0.460043	0.976527	0.311013	0.479481	-0.00177562	0.999328	-0.28967	0.997673	-0.447544	0.715796	0.160205	0.996956	-0.0199362	0.953059	0.181838	0.465838	0.350788	0.138769	-0.108236	0.66816	-0.135866	0.70069	0.157258	0.725619	-0.304001	0.997151	-0.103822	0.800342	-0.024889	0.984689	-0.366157
Phosphatidylcholines__PC ae C42:1	Phosphatidylcholines	PC ae C42:1	0.492902	0.484629	0.603454	0.366411	0.0556578	0.980376	0.0182457	0.934609	0.122247	0.73227	0.0582762	0.950143	0.21864	0.35785	0.249807	0.85786	-0.423232	0.976527	0.320878	0.451428	-0.300591	0.54248	-0.463978	0.997673	ND	ND	ND	ND	ND	ND	ND	ND	ND	ND	ND	ND	ND	ND	ND	ND	ND	ND	ND	ND	ND	ND	ND
Phosphatidylcholines__PC ae C42:2	Phosphatidylcholines	PC ae C42:2	0.257826	0.671843	0.341913	0.817167	-0.116046	0.972143	0.0201346	0.934609	0.0683253	0.884811	-0.157322	0.918129	0.11967	0.692322	0.102864	0.85786	-0.520436	0.976527	0.470871	0.424733	-0.564451	0.385725	-0.274916	0.997673	ND	ND	ND	ND	ND	ND	ND	ND	ND	ND	ND	ND	ND	ND	ND	ND	ND	ND	ND	ND	ND	ND	ND
Phosphatidylcholines__PC ae C42:3	Phosphatidylcholines	PC ae C42:3	0.355849	0.532568	0.307588	0.803629	0.034848	0.985243	0.192174	0.451072	0.0902456	0.832054	-0.0717199	0.955262	0.228039	0.446606	0.155471	0.85786	-0.16848	0.976527	0.438606	0.424733	-0.199426	0.691403	-0.273597	0.997673	-0.215582	0.746672	-0.0536105	0.996956	0.0346461	0.906745	0.595342	0.111121	0.555014	0.0423016	-0.16711	0.585422	0.0538971	0.849962	0.0604172	0.799518	0.073249	0.997151	0.157635	0.715497	-0.0398645	0.984689	ND
Phosphatidylcholines__PC ae C44:3	Phosphatidylcholines	PC ae C44:3	ND	ND	ND	ND	-0.202817	0.94179	ND	ND	ND	ND	-0.239575	0.885223	ND	ND	ND	ND	ND	ND	ND	ND	ND	ND	-0.251257	0.997673	ND	ND	ND	ND	ND	ND	ND	ND	ND	ND	ND	ND	ND	ND	ND	ND	ND	ND	ND	ND	ND	ND	ND
Sphingomyelins__SM (OH) C14:1	Sphingomyelins	SM (OH) C14:1	0.431883	0.671843	0.450266	0.400051	0.252821	0.94179	-0.041749	0.875445	0.70044	0.160691	0.488695	0.893472	0.449716	0.489422	0.541075	0.85786	-0.00765357	0.998075	0.456789	0.517469	0.416658	0.616637	-0.438121	0.997673	ND	ND	ND	ND	ND	ND	ND	ND	ND	ND	ND	ND	ND	ND	ND	ND	ND	ND	ND	ND	ND	ND	ND
Sphingomyelins__SM (OH) C16:1	Sphingomyelins	SM (OH) C16:1	0.424465	0.671843	0.335343	0.449124	0.156753	0.965729	0.0858583	0.837779	0.00916	0.991111	0.3697	0.893472	0.440133	0.341591	0.252916	0.85786	-0.36442	0.976527	0.559706	0.434535	0.275235	0.691403	-0.306782	0.997673	ND	ND	0.0887042	0.996956	ND	ND	0.725825	0.370153	0.613302	0.451274	ND	ND	0.218424	0.56387	0.516917	0.725619	ND	ND	ND	ND	0.314873	0.984689	0.374396
Sphingomyelins__SM (OH) C22:1	Sphingomyelins	SM (OH) C22:1	0.448631	0.486224	0.321928	0.408114	0.300702	0.94179	-0.619767	0.121139	-0.734106	0.152728	0.0174016	0.980492	0.407707	0.320071	0.263399	0.85786	-0.271238	0.976527	0.525726	0.424733	0.138328	0.834185	-0.155933	0.997673	ND	ND	-0.0572672	0.996956	ND	ND	ND	ND	0.0535132	0.903938	ND	ND	ND	ND	0.23731	0.725619	ND	ND	ND	ND	0.252417	0.984689	ND
Sphingomyelins__SM (OH) C22:2	Sphingomyelins	SM (OH) C22:2	0.110818	0.869666	0.219781	0.960768	0.221272	0.965729	-0.167767	0.623029	-0.509365	0.339479	0.114874	0.938311	0.638664	0.25737	0.575803	0.85786	0.150042	0.976527	0.69809	0.435323	-0.014684	0.999328	-0.693839	0.997673	ND	ND	ND	ND	ND	ND	0.431846	0.469342	-0.030102	0.930536	ND	ND	ND	ND	0.122336	0.914215	ND	ND	ND	ND	ND	ND	ND
Sphingomyelins__SM (OH) C24:1	Sphingomyelins	SM (OH) C24:1	0.318658	0.671843	-0.12055	0.881429	0.0797054	0.972143	-0.281664	0.258569	-0.56646	0.142393	-0.105982	0.938311	0.395166	0.231604	0.0791369	0.871707	-0.300339	0.976527	0.624344	0.424733	-0.0157673	0.983759	-0.149083	0.997673	ND	ND	0.0572249	0.996956	ND	ND	0.0264183	0.906399	0.258859	0.601911	ND	ND	0.111141	0.680952	0.0928488	0.812123	ND	ND	0.0264183	0.938056	0.144688	0.984689	ND
Sphingomyelins__SM C16:0	Sphingomyelins	SM C16:0	0.557867	0.623533	0.383817	0.366411	0.190245	0.94179	0.17709	0.612675	0.329696	0.616819	0.395238	0.885223	0.260291	0.538706	0.253317	0.85786	-0.364023	0.976527	0.438661	0.444278	0.025322	0.982712	-0.279163	0.997673	ND	ND	ND	ND	-0.194866	0.69961	0.582628	0.411471	0.842221	0.349164	ND	ND	-0.200864	0.707084	0.210788	0.788326	-0.194972	0.997151	-0.348763	0.56576	-0.654225	0.979588	-0.219744
Sphingomyelins__SM C16:1	Sphingomyelins	SM C16:1	0.52682	0.671843	-0.0729861	0.990615	0.279125	0.949428	0.0122471	0.969908	0.250122	0.763938	0.763363	0.885223	0.660438	0.414638	0.547672	0.85786	-0.0696129	0.986837	0.429722	0.479481	-0.0952847	0.922757	-0.501045	0.997673	ND	ND	ND	ND	ND	ND	ND	ND	ND	ND	ND	ND	ND	ND	ND	ND	ND	ND	ND	ND	ND	ND	ND
Sphingomyelins__SM C18:0	Sphingomyelins	SM C18:0	0.427873	0.671843	0.0641303	0.990615	0.118917	0.965729	-0.0695409	0.875445	-0.222572	0.697153	0.342018	0.893472	0.387023	0.355724	0.206002	0.85786	-0.381167	0.976527	0.551057	0.424733	-0.0727718	0.889252	-0.394184	0.997673	ND	ND	ND	ND	-0.500166	0.58442	0.909626	0.451736	0.637286	0.57342	ND	ND	0.283084	0.779086	0.178649	0.879512	-0.277338	0.997151	ND	ND	-0.224349	0.984689	-0.196038
Sphingomyelins__SM C18:1	Sphingomyelins	SM C18:1	0.523955	0.671843	-0.205141	0.817167	0.025091	0.985243	-0.0366651	0.934609	-0.111752	0.893474	0.253757	0.895328	0.736604	0.356262	0.380569	0.85786	-0.483481	0.976527	0.50316	0.435323	-0.16531	0.834185	-0.626439	0.997673	ND	ND	ND	ND	ND	ND	ND	ND	ND	ND	ND	ND	ND	ND	ND	ND	ND	ND	ND	ND	ND	ND	ND
Sphingomyelins__SM C20:2	Sphingomyelins	SM C20:2	-0.338416	0.735531	ND	ND	0.203533	0.965729	0.0324215	0.934609	ND	ND	0.743508	0.893472	-0.0164881	0.968794	ND	ND	ND	ND	-0.216258	0.69145	ND	ND	ND	ND	ND	ND	ND	ND	ND	ND	ND	ND	ND	ND	ND	ND	ND	ND	ND	ND	ND	ND	ND	ND	ND	ND	ND
Sphingomyelins__SM C22:3	Sphingomyelins	SM C22:3	0.51597	0.640379	0.56492	0.366411	-0.0641303	0.980376	0.105686	0.697851	0.33916	0.763332	-0.170415	0.895328	0.0128431	0.965278	0.24884	0.85786	-0.386058	0.976527	-0.0173039	0.958892	-0.101739	0.885379	-0.287069	0.997673	-0.467267	0.715796	-0.0688389	0.996956	-0.305292	0.58442	-0.292181	0.519751	-0.0797272	0.83699	-0.207595	0.764405	-0.053893	0.869506	-0.471276	0.725619	-0.314511	0.997151	-0.115077	0.783939	-0.118497	0.984689	-0.190522
Sphingomyelins__SM C24:0	Sphingomyelins	SM C24:0	0.645296	0.387136	0.438988	0.366411	0.242143	0.94179	-0.0894489	0.804715	-0.144556	0.856921	0.172702	0.895328	0.364885	0.296235	0.180078	0.85786	-0.238736	0.976527	0.660069	0.424733	0.00419388	0.999328	-0.160653	0.997673	ND	ND	-0.031384	0.996956	-0.0231085	0.906745	0.42657	0.468228	0.25641	0.633945	ND	ND	-0.136215	0.779086	0.329001	0.725619	ND	ND	ND	ND	0.387742	0.984689	ND
Sphingomyelins__SM C24:1	Sphingomyelins	SM C24:1	0.329748	0.674056	0.09211	0.990615	0.129406	0.965729	-0.55613	0.253305	-0.727141	0.152728	0.151502	0.918129	0.572212	0.234923	0.445193	0.85786	-0.415276	0.976527	0.768036	0.424733	0.046403	0.945891	-0.518211	0.997673	ND	ND	ND	ND	-0.434078	0.546862	ND	ND	-0.599274	0.472852	ND	ND	0.190322	0.759125	-0.0287663	0.97733	ND	ND	ND	ND	ND	ND	ND
Sphingomyelins__SM C26:0	Sphingomyelins	SM C26:0	0.626239	0.39875	0.209599	0.912017	0.230298	0.965729	ND	ND	-0.242913	0.47296	-0.0336831	0.979948	0.450754	0.17726	0.332695	0.85786	-0.208587	0.976527	0.593817	0.424733	0.196692	0.799457	0.151309	0.997673	ND	ND	ND	ND	ND	ND	ND	ND	ND	ND	ND	ND	ND	ND	ND	ND	ND	ND	ND	ND	ND	ND	ND
Sphingomyelins__SM C26:1	Sphingomyelins	SM C26:1	0.0805564	0.873341	0.242458	0.960768	0.372446	0.94179	-0.435819	0.25822	-0.301254	0.615783	0	1	0.0422282	0.923552	0.629325	0.85786	-0.08092	0.987879	0.169608	0.558436	-0.489204	0.523848	0.0515303	0.997673	ND	ND	ND	ND	ND	ND	ND	ND	ND	ND	ND	ND	ND	ND	ND	ND	ND	ND	ND	ND	ND	ND	ND
Triglycerides__TG(14:0_32:2)	Triglycerides	TG(14:0_32:2)	0.298312	0.674056	-0.0640158	0.990615	0.270839	0.965729	-2.0619	0.0392901	-2.22356	0.160691	-0.186966	0.938311	0.308277	0.566858	0.449617	0.85786	-0.260899	0.976527	0.342161	0.732748	0.0456912	0.983759	-0.276896	0.997673	ND	ND	ND	ND	ND	ND	ND	ND	ND	ND	ND	ND	ND	ND	ND	ND	ND	ND	ND	ND	ND	ND	ND
Triglycerides__TG(14:0_34:0)	Triglycerides	TG(14:0_34:0)	0.181565	0.776794	0.0729375	0.990615	-0.108362	0.980376	-1.67087	0.0947117	-1.92807	0.122674	-0.508795	0.895328	-0.00213955	0.996557	0.386354	0.85786	-0.300209	0.976527	0.164079	0.836405	0.173227	0.861301	-0.295426	0.997673	ND	ND	ND	ND	ND	ND	ND	ND	ND	ND	ND	ND	ND	ND	ND	ND	ND	ND	ND	ND	ND	ND	ND
Triglycerides__TG(14:0_34:1)	Triglycerides	TG(14:0_34:1)	0.282716	0.697045	-0.0508243	0.990615	-0.120163	0.980376	-1.92064	0.0688491	-2.51976	0.117672	-0.605134	0.895328	0.0815619	0.90126	0.341652	0.85786	-0.430493	0.976527	0.230598	0.80133	0.0208754	0.999027	-0.327529	0.997673	ND	ND	ND	ND	ND	ND	ND	ND	ND	ND	ND	ND	ND	ND	ND	ND	ND	ND	ND	ND	ND	ND	ND
Triglycerides__TG(14:0_34:2)	Triglycerides	TG(14:0_34:2)	0.233505	0.700103	0.0264342	0.990615	0.288476	0.965729	-1.99234	0.0358203	-2.1289	0.128844	-0.280862	0.918129	0.395702	0.466829	0.487818	0.85786	-0.113547	0.976527	0.46805	0.626514	0.219668	0.834185	-0.240446	0.997673	ND	ND	ND	ND	ND	ND	ND	ND	ND	ND	ND	ND	ND	ND	ND	ND	0.396165	0.997151	ND	ND	ND	ND	-0.622957
Triglycerides__TG(14:0_34:3)	Triglycerides	TG(14:0_34:3)	0.380885	0.671843	-0.13867	0.990615	0.421642	0.965729	-2.27078	0.0299716	-2.43877	0.142393	-0.135274	0.939868	0.501285	0.296235	0.465715	0.85786	-0.185142	0.976527	0.582049	0.576388	0.218963	0.86028	-0.225271	0.997673	ND	ND	ND	ND	ND	ND	ND	ND	ND	ND	ND	ND	ND	ND	ND	ND	ND	ND	ND	ND	ND	ND	ND
Triglycerides__TG(14:0_35:1)	Triglycerides	TG(14:0_35:1)	0.0830435	0.861571	0.0820156	0.990615	0.212959	0.965729	-1.43097	0.0476634	-1.31347	0.138627	-0.0869934	0.973119	0.539778	0.360364	0.505727	0.85786	-0.0179979	0.998075	0.833838	0.424733	0.551993	0.54248	-0.0259887	0.997673	ND	ND	ND	ND	ND	ND	ND	ND	ND	ND	ND	ND	ND	ND	ND	ND	ND	ND	ND	ND	ND	ND	ND
Triglycerides__TG(14:0_35:2)	Triglycerides	TG(14:0_35:2)	0.304395	0.671843	0.101468	0.990615	0.288876	0.965729	-1.62783	0.0299716	-1.41458	0.160974	-0.174875	0.933799	0.647087	0.341591	0.316935	0.85786	-0.102081	0.976527	1.02495	0.424733	0.433496	0.613246	-0.234245	0.997673	ND	ND	ND	ND	ND	ND	ND	ND	ND	ND	ND	ND	ND	ND	ND	ND	ND	ND	ND	ND	ND	ND	ND
Triglycerides__TG(14:0_36:1)	Triglycerides	TG(14:0_36:1)	0.325535	0.693638	0.302196	0.97567	-0.142821	0.974836	-1.53443	0.124365	-1.93955	0.117672	-0.609938	0.895328	0.181162	0.827074	0.339252	0.85786	-0.382128	0.976527	0.334124	0.742748	0.355841	0.711466	-0.348645	0.997673	ND	ND	ND	ND	ND	ND	ND	ND	ND	ND	ND	ND	ND	ND	ND	ND	ND	ND	ND	ND	ND	ND	ND
Triglycerides__TG(14:0_36:2)	Triglycerides	TG(14:0_36:2)	0.361215	0.671843	0.209123	0.990615	-0.0255699	0.985243	-1.69915	0.0721916	-2.17834	0.117672	-0.617894	0.895328	0.368428	0.580024	0.367122	0.85786	-0.403129	0.976527	0.554888	0.599514	0.331123	0.725678	-0.344921	0.997673	ND	ND	ND	ND	ND	ND	ND	ND	ND	ND	ND	ND	ND	ND	ND	ND	ND	ND	ND	ND	ND	ND	ND
Triglycerides__TG(14:0_36:3)	Triglycerides	TG(14:0_36:3)	0.32181	0.671843	0.161171	0.990615	0.342215	0.965729	-1.69982	0.0384233	-1.8667	0.128844	-0.35765	0.895328	0.80879	0.266435	0.464728	0.85786	-0.0725864	0.987879	0.793458	0.479481	0.53744	0.574695	-0.166513	0.997673	0.854311	0.746672	-0.319773	0.996956	-1.324	0.50152	1.89147	0.358274	0.392625	0.715302	-0.955103	0.521806	ND	ND	-0.564886	0.725619	0.405679	0.997151	ND	ND	ND	ND	-0.569499
Triglycerides__TG(14:0_36:4)	Triglycerides	TG(14:0_36:4)	0.225761	0.704085	0.206725	0.990615	0.743771	0.94179	-1.76675	0.0299716	-1.56729	0.152728	0.0279377	0.989816	1.12353	0.107298	0.420816	0.85786	0.191369	0.976527	0.902307	0.435323	0.649493	0.476808	-0.120613	0.997673	0.518018	0.746672	-0.0399504	0.996956	-1.04439	0.50152	1.99733	0.358274	0.892405	0.576423	ND	ND	ND	ND	-0.552921	0.725619	0.42044	0.997151	ND	ND	0.192378	0.984689	-0.596248
Triglycerides__TG(14:0_38:4)	Triglycerides	TG(14:0_38:4)	0.396127	0.671843	0.655175	0.849932	0.584821	0.94179	-0.987191	0.121476	-0.560211	0.463146	0.310968	0.918129	0.83212	0.360364	0.188141	0.85786	0.221969	0.976527	0.903182	0.424733	0.477252	0.669615	-0.335855	0.997673	ND	ND	ND	ND	ND	ND	ND	ND	ND	ND	ND	ND	ND	ND	ND	ND	ND	ND	ND	ND	ND	ND	ND
Triglycerides__TG(14:0_38:5)	Triglycerides	TG(14:0_38:5)	0.488517	0.671843	0.530583	0.881429	0.533393	0.94179	-0.581158	0.294989	-0.180498	0.856921	0.571512	0.895328	0.895673	0.342687	0.382031	0.85786	0.0210144	0.998075	0.931539	0.424733	0.384929	0.680672	-0.27612	0.997673	ND	ND	ND	ND	ND	ND	ND	ND	ND	ND	ND	ND	ND	ND	ND	ND	ND	ND	ND	ND	ND	ND	ND
Triglycerides__TG(16:0_28:1)	Triglycerides	TG(16:0_28:1)	0.0424111	0.93038	-0.272643	0.985602	0.224277	0.965729	-2.26213	0.0299716	-2.37584	0.122674	-0.00450608	0.999946	0.303933	0.497536	0.312021	0.85786	-0.184016	0.976527	0.16109	0.829702	0.11728	0.932964	-0.116778	0.997673	ND	ND	ND	ND	ND	ND	ND	ND	ND	ND	ND	ND	ND	ND	ND	ND	ND	ND	ND	ND	ND	ND	ND
Triglycerides__TG(16:0_28:2)	Triglycerides	TG(16:0_28:2)	-0.0908465	0.861571	-0.0921792	0.990615	0.783422	0.94179	-1.90049	0.0299716	-1.29574	0.16946	0.427805	0.893472	0.990261	0.176138	0.477828	0.85786	0.245169	0.976527	0.375896	0.593521	0.603898	0.67394	0.0201358	0.997673	ND	ND	ND	ND	ND	ND	ND	ND	ND	ND	ND	ND	ND	ND	ND	ND	ND	ND	ND	ND	ND	ND	ND
Triglycerides__TG(16:0_30:2)	Triglycerides	TG(16:0_30:2)	0.238574	0.7081	-0.111667	0.990615	0.363488	0.965729	-2.07022	0.033333	-2.17229	0.128844	-0.0599275	0.973119	0.551268	0.296235	0.432509	0.85786	-0.166312	0.976527	0.374198	0.659444	0.195446	0.86028	-0.252819	0.997673	ND	ND	ND	ND	ND	ND	ND	ND	ND	ND	ND	ND	ND	ND	ND	ND	ND	ND	ND	ND	ND	ND	ND
Triglycerides__TG(16:0_32:0)	Triglycerides	TG(16:0_32:0)	0.030194	0.956565	-0.13315	0.990615	-0.0313877	0.985243	-1.90422	0.0582839	-2.31718	0.117672	-0.281677	0.918129	-0.0237417	0.965278	0.378499	0.85786	-0.242834	0.976527	0.17262	0.823316	0.191005	0.859159	-0.356122	0.997673	ND	ND	ND	ND	ND	ND	ND	ND	ND	ND	ND	ND	ND	ND	ND	ND	ND	ND	ND	ND	ND	ND	ND
Triglycerides__TG(16:0_32:1)	Triglycerides	TG(16:0_32:1)	0.205979	0.733244	-0.134244	0.990615	-0.0720707	0.985243	-2.40503	0.0396398	-2.83584	0.122674	-0.390249	0.918129	-0.185711	0.735869	0.449545	0.85786	-0.420786	0.976527	0.147794	0.857734	-0.0276488	0.995156	-0.380494	0.997673	ND	ND	ND	ND	ND	ND	ND	ND	ND	ND	ND	ND	ND	ND	ND	ND	ND	ND	ND	ND	ND	ND	-0.465401
Triglycerides__TG(16:0_32:2)	Triglycerides	TG(16:0_32:2)	0.242451	0.697045	-0.0848822	0.990615	0.152925	0.974836	-2.22265	0.0330517	-2.42376	0.128844	-0.249693	0.928971	0.241648	0.603528	0.413927	0.85786	-0.244332	0.976527	0.337292	0.715671	0.121679	0.922757	-0.347855	0.997673	ND	ND	ND	ND	ND	ND	ND	ND	ND	ND	ND	ND	ND	ND	ND	ND	ND	ND	ND	ND	ND	ND	ND
Triglycerides__TG(16:0_32:3)	Triglycerides	TG(16:0_32:3)	0.267279	0.692099	-0.178935	0.990615	0.396253	0.965729	-2.1462	0.0299716	-2.16364	0.152728	0.0119726	0.995062	0.479623	0.342687	0.393581	0.85786	-0.136553	0.976527	0.648755	0.53991	0.25302	0.832612	-0.165737	0.997673	ND	ND	ND	ND	ND	ND	ND	ND	ND	ND	ND	ND	ND	ND	ND	ND	ND	ND	ND	ND	ND	ND	ND
Triglycerides__TG(16:0_33:1)	Triglycerides	TG(16:0_33:1)	0.191242	0.709307	0.0226876	0.990615	0.312357	0.965729	-1.97627	0.0299716	-1.58431	0.167396	-0.0161462	0.995062	0.499655	0.342687	0.392416	0.85786	0.00659627	0.998075	0.645089	0.505343	0.444233	0.680672	-0.235438	0.997673	ND	ND	ND	ND	ND	ND	ND	ND	ND	ND	ND	ND	ND	ND	ND	ND	ND	ND	ND	ND	ND	ND	ND
Triglycerides__TG(16:0_33:2)	Triglycerides	TG(16:0_33:2)	0.284782	0.680498	0.211107	0.990615	0.66548	0.94179	-1.81079	0.0299716	-1.45271	0.152728	0.184085	0.933799	0.83035	0.18911	0.493989	0.85786	0.120572	0.976527	0.854772	0.449421	0.659371	0.471021	-0.237918	0.997673	ND	ND	ND	ND	ND	ND	ND	ND	ND	ND	ND	ND	ND	ND	ND	ND	ND	ND	ND	ND	ND	ND	ND
Triglycerides__TG(16:0_34:0)	Triglycerides	TG(16:0_34:0)	0.176891	0.776794	0.0600791	0.990615	-0.0910921	0.981523	-1.72992	0.0721916	-2.14262	0.117672	-0.490362	0.895328	0.0529796	0.936299	0.375837	0.85786	-0.339874	0.976527	0.285626	0.748725	0.281664	0.737028	-0.285566	0.997673	ND	ND	ND	ND	ND	ND	ND	ND	ND	ND	ND	ND	ND	ND	ND	ND	ND	ND	ND	ND	ND	ND	ND
Triglycerides__TG(16:0_34:1)	Triglycerides	TG(16:0_34:1)	0.177768	0.75808	0.0271791	0.990615	-0.0548367	0.985243	-2.02763	0.0460347	-2.27256	0.117672	-0.54128	0.895328	0.0318208	0.954849	0.394239	0.85786	-0.369669	0.976527	0.264607	0.75594	0.176593	0.861301	-0.334127	0.997673	ND	ND	ND	ND	-1.25033	0.50152	1.2923	0.358274	0.683258	0.691446	ND	ND	ND	ND	ND	ND	0.374271	0.997151	ND	ND	ND	ND	-0.660182
Triglycerides__TG(16:0_34:2)	Triglycerides	TG(16:0_34:2)	0.225016	0.697045	0.0443394	0.990615	0.180609	0.972143	-2.03629	0.0299716	-1.97937	0.123551	-0.322395	0.895328	0.365375	0.41936	0.434855	0.85786	-0.200047	0.976527	0.449148	0.58716	0.264163	0.743646	-0.250857	0.997673	0.722912	0.746672	ND	ND	-1.17889	0.50152	1.56939	0.358274	0.676159	0.576423	ND	ND	-1.35261	0.0691977	-0.347967	0.766152	0.771584	0.997151	-0.918902	0.522326	0.188338	0.984689	-0.365125
Triglycerides__TG(16:0_34:3)	Triglycerides	TG(16:0_34:3)	0.295014	0.671843	-0.0686569	0.990615	0.353599	0.965729	-2.29673	0.0299716	-2.24704	0.142393	-0.158918	0.933799	0.437174	0.320126	0.465336	0.85786	-0.10676	0.976527	0.630164	0.535712	0.337866	0.738134	-0.209373	0.997673	0.981129	0.746672	-0.109526	0.996956	-1.54011	0.50152	1.85098	0.358274	0.756791	0.58216	ND	ND	-1.21739	0.147897	-0.415411	0.749297	0.0802655	0.997151	-0.778694	0.522973	0.268631	0.984689	-0.637324
Triglycerides__TG(16:0_34:4)	Triglycerides	TG(16:0_34:4)	0.49228	0.671843	-0.149362	0.990615	0.602804	0.94179	-2.07161	0.0299716	-1.96361	0.160691	0.365036	0.895328	0.5583	0.274637	0.342182	0.85786	-0.0845625	0.976527	0.736781	0.491083	0.252001	0.835623	-0.247633	0.997673	ND	ND	ND	ND	ND	ND	ND	ND	ND	ND	ND	ND	ND	ND	ND	ND	ND	ND	ND	ND	ND	ND	-0.394427
Triglycerides__TG(16:0_35:1)	Triglycerides	TG(16:0_35:1)	0.175098	0.733244	0.156138	0.990615	0.246805	0.965729	-1.75995	0.0299716	-1.61338	0.122674	-0.0816263	0.973119	0.525183	0.354742	0.424665	0.85786	-0.0610916	0.987879	0.64654	0.511533	0.651203	0.529764	-0.0329465	0.997673	ND	ND	ND	ND	ND	ND	ND	ND	ND	ND	ND	ND	ND	ND	ND	ND	ND	ND	ND	ND	ND	ND	ND
Triglycerides__TG(16:0_35:2)	Triglycerides	TG(16:0_35:2)	0.288902	0.671843	0.068989	0.990615	0.358707	0.965729	-1.89864	0.0299716	-1.6982	0.128844	-0.0573805	0.973119	0.67965	0.285172	0.411633	0.85786	0.0224341	0.996128	0.766923	0.458399	0.525165	0.574695	-0.0788252	0.997673	ND	ND	ND	ND	ND	ND	ND	ND	ND	ND	ND	ND	ND	ND	ND	ND	ND	ND	ND	ND	ND	ND	ND
Triglycerides__TG(16:0_35:3)	Triglycerides	TG(16:0_35:3)	0.228728	0.687127	0.211596	0.990615	0.620965	0.94179	-1.85846	0.0299716	-1.49784	0.16998	0.163688	0.933799	0.74433	0.209807	0.519242	0.85786	0.115509	0.976527	0.782321	0.458399	0.61978	0.514327	-0.00125762	1	ND	ND	ND	ND	ND	ND	ND	ND	ND	ND	ND	ND	ND	ND	ND	ND	ND	ND	ND	ND	ND	ND	ND
Triglycerides__TG(16:0_36:2)	Triglycerides	TG(16:0_36:2)	0.359904	0.671843	0.199275	0.990615	-0.0647135	0.985243	-1.81983	0.0664897	-2.0188	0.117672	-0.620765	0.895328	0.258725	0.661817	0.363419	0.85786	-0.339783	0.976527	0.497843	0.595402	0.36577	0.67394	-0.334058	0.997673	0.782516	0.746672	-0.037047	0.996956	-1.29331	0.50152	1.86614	0.358274	0.504173	0.715302	ND	ND	-0.98733	0.247067	-0.443769	0.725619	0.250573	0.997151	-0.531586	0.670886	0.562665	0.984689	-0.846987
Triglycerides__TG(16:0_36:3)	Triglycerides	TG(16:0_36:3)	0.306636	0.671843	0.150068	0.990615	0.340937	0.965729	-1.75892	0.033333	-1.7159	0.128844	-0.322994	0.895328	0.731727	0.266435	0.399894	0.85786	-0.0354818	0.990931	0.794874	0.458399	0.54836	0.514327	-0.172675	0.997673	0.72271	0.746672	0.125463	0.996956	-1.29601	0.50152	1.69417	0.358274	0.938538	0.576423	-0.891306	0.656502	-0.723038	0.380049	-0.761004	0.725619	-0.0870927	0.997151	-0.552283	0.671568	0.170947	0.984689	-0.599571
Triglycerides__TG(16:0_36:4)	Triglycerides	TG(16:0_36:4)	0.222065	0.705186	0.278517	0.960768	0.783632	0.94179	-1.74616	0.0299716	-1.29575	0.174167	0.0641946	0.974506	1.11689	0.107298	0.483833	0.85786	0.201672	0.976527	1.06018	0.424733	0.780881	0.385725	-0.0943913	0.997673	0.528536	0.746672	0.402135	0.996956	-1.08166	0.50152	1.69681	0.368396	1.01001	0.576423	-1.31512	0.521806	-0.715604	0.40078	-0.640588	0.725619	-0.290371	0.997151	-0.849921	0.534988	0.131891	0.984689	-0.490623
Triglycerides__TG(16:0_36:5)	Triglycerides	TG(16:0_36:5)	0.431615	0.671843	0.144235	0.990615	0.933566	0.94179	-1.77972	0.0299716	-1.14795	0.213014	0.495461	0.895328	1.07774	0.097078	0.516066	0.85786	0.235846	0.976527	1.07789	0.424733	0.694943	0.418318	-0.25228	0.997673	0.585045	0.746672	0.152797	0.996956	-1.05977	0.50152	1.72538	0.358274	1.05306	0.576423	-0.803098	0.642446	-0.785499	0.324919	-0.721004	0.725619	-0.16545	0.997151	-0.859582	0.522973	-0.226169	0.984689	-0.422182
Triglycerides__TG(16:0_36:6)	Triglycerides	TG(16:0_36:6)	0.341052	0.671843	0.131879	0.990615	0.889174	0.94179	-1.2992	0.051335	-0.356808	0.705334	0.74483	0.893472	0.773277	0.259137	0.36316	0.85786	0.0798492	0.990931	0.84306	0.435323	0.578086	0.540563	0.0583535	0.997673	0.641009	0.746672	-0.0998562	0.996956	-0.902463	0.518407	1.41221	0.405183	0.712847	0.633527	-0.0410475	0.990479	-0.794396	0.405577	-0.602457	0.725619	-0.341773	0.997151	ND	ND	ND	ND	-0.344173
Triglycerides__TG(16:0_37:3)	Triglycerides	TG(16:0_37:3)	0.224581	0.699297	0.169795	0.990615	0.673195	0.94179	-1.67176	0.0299716	-1.61227	0.136325	0.17443	0.937713	0.860515	0.135801	0.404736	0.85786	0.118189	0.976527	0.941575	0.458399	0.692304	0.45301	0.10494	0.997673	-0.077041	0.926502	-0.12229	0.996956	-0.741781	0.50152	1.4351	0.358274	0.175014	0.815975	ND	ND	-0.756331	0.271105	-0.529948	0.725619	ND	ND	-0.584963	0.522973	-0.590069	0.984689	-0.474558
Triglycerides__TG(16:0_38:1)	Triglycerides	TG(16:0_38:1)	-0.0126738	0.983212	0.27716	0.960768	-0.138974	0.974836	-1.22698	0.155565	-1.29631	0.128844	-0.59533	0.895328	0.276756	0.692322	0.582631	0.85786	-0.262566	0.976527	0.362352	0.728313	0.668736	0.490577	-0.0767723	0.997673	ND	ND	ND	ND	ND	ND	ND	ND	ND	ND	ND	ND	ND	ND	ND	ND	ND	ND	ND	ND	ND	ND	ND
Triglycerides__TG(16:0_38:2)	Triglycerides	TG(16:0_38:2)	0.133305	0.846677	0.276856	0.960768	0.167865	0.972143	-1.46762	0.0947117	-1.40165	0.128844	-0.38763	0.895328	0.479318	0.482541	0.567793	0.85786	-0.103068	0.982198	0.495123	0.60499	0.615099	0.390433	-0.0259578	0.997673	0.355221	0.784509	ND	ND	ND	ND	1.3916	0.358274	0.944929	0.576423	ND	ND	-0.595051	0.317724	0.201399	0.788326	ND	ND	ND	ND	ND	ND	-0.767115
Triglycerides__TG(16:0_38:3)	Triglycerides	TG(16:0_38:3)	0.139664	0.80905	0.475057	0.881429	0.478115	0.94179	-1.42868	0.0526005	-1.08773	0.169529	-0.074527	0.973119	0.799494	0.310729	0.539854	0.85786	0.208415	0.976527	0.697679	0.485912	0.78621	0.385725	-0.0596395	0.997673	0.69231	0.746672	-0.0474301	0.996956	-1.10346	0.50152	1.91149	0.358274	0.799709	0.576423	-1.12326	0.527614	-0.830308	0.247067	-0.418151	0.743609	0.135687	0.997151	ND	ND	0.326028	0.984689	-0.597497
Triglycerides__TG(16:0_38:4)	Triglycerides	TG(16:0_38:4)	0.219918	0.724714	0.614412	0.817167	0.665964	0.94179	-1.23129	0.0736066	-0.574345	0.484124	0.346305	0.901189	0.705478	0.342687	0.50234	0.85786	0.223484	0.976527	0.582894	0.491083	0.596453	0.515994	-0.298014	0.997673	0.83654	0.746672	0.275808	0.996956	-1.23768	0.50152	1.89123	0.359856	1.01794	0.576423	ND	ND	-0.884152	0.343521	-0.68419	0.725619	-0.297762	0.997151	-0.745954	0.632469	0.0919061	0.984689	-0.730223
Triglycerides__TG(16:0_38:5)	Triglycerides	TG(16:0_38:5)	0.394469	0.671843	0.621354	0.849932	0.749972	0.94179	-1.15655	0.0865488	-0.442564	0.611122	0.688793	0.893472	0.625713	0.355724	0.369669	0.85786	0.185914	0.976527	0.592044	0.485912	0.492472	0.574695	-0.34245	0.997673	0.481029	0.746672	0.14026	0.996956	-1.26317	0.50152	1.41226	0.394881	0.799681	0.576423	-1.41804	0.521806	-0.724593	0.508576	-0.710755	0.725619	-0.680198	0.997151	-0.745761	0.646975	-0.292931	0.984689	-0.659299
Triglycerides__TG(16:0_38:6)	Triglycerides	TG(16:0_38:6)	0.344747	0.671843	0.598914	0.83026	0.974756	0.94179	-1.08142	0.0794571	-0.366504	0.680751	0.795367	0.893472	0.852542	0.296235	0.421215	0.85786	0.335274	0.976527	0.696767	0.458399	0.521277	0.523848	-0.341576	0.997673	0.23196	0.850776	0.367592	0.996956	-0.968008	0.50152	1.22067	0.442219	0.803736	0.576423	-1.12698	0.521806	-0.856946	0.43382	-0.520826	0.725619	-0.545746	0.997151	-1.15701	0.522326	-0.292143	0.984689	-0.435068
Triglycerides__TG(16:0_38:7)	Triglycerides	TG(16:0_38:7)	0.32758	0.671843	0.0975715	0.990615	0.579901	0.94179	-0.963808	0.0928506	-0.672195	0.297453	0.635163	0.893472	0.649558	0.334741	0.278519	0.85786	0.0556116	0.990931	0.948441	0.424733	0.517514	0.588087	-0.0993352	0.997673	0.302906	0.746672	0.189259	0.996956	-0.943541	0.50152	1.09922	0.419337	0.663115	0.590439	-0.942627	0.521806	-0.952376	0.323229	-0.612619	0.728094	-0.503593	0.997151	-1.02641	0.522326	0.0323263	0.987752	-0.533262
Triglycerides__TG(16:0_40:6)	Triglycerides	TG(16:0_40:6)	0.460287	0.671843	0.972802	0.665588	0.696394	0.94179	-0.723004	0.257272	-0.0653033	0.948002	0.415205	0.901189	0.994462	0.351072	0.499749	0.85786	0.523282	0.976527	0.782497	0.458399	0.713017	0.471021	-0.458193	0.997673	0.501838	0.746672	0.0996748	0.996956	-1.58473	0.50152	1.63882	0.370153	0.908675	0.576423	-1.55921	0.521806	-0.783389	0.380049	-0.570423	0.725619	-0.559892	0.997151	-0.895104	0.532473	-0.0645017	0.984689	-1.14076
Triglycerides__TG(16:0_40:7)	Triglycerides	TG(16:0_40:7)	0.419973	0.671843	1.0631	0.665119	0.684802	0.94179	-0.700518	0.298918	0.26917	0.786081	0.521454	0.895328	0.989808	0.351072	0.588313	0.85786	0.593537	0.976527	1.10983	0.424733	0.807944	0.388927	-0.492182	0.997673	0.584469	0.746672	0.124551	0.996956	-0.988086	0.50152	1.30496	0.419337	0.706634	0.57852	-1.32182	0.521806	-0.901905	0.368594	-0.831889	0.725619	-0.310096	0.997151	-0.925038	0.522326	-0.201428	0.984689	-0.545087
Triglycerides__TG(16:0_40:8)	Triglycerides	TG(16:0_40:8)	0.416705	0.671843	1.04763	0.663675	0.715677	0.94179	-0.553283	0.272375	0.344953	0.600005	0.633797	0.893472	1.09636	0.234923	0.390474	0.85786	0.757143	0.976527	1.42865	0.424733	0.928034	0.390433	0.169172	0.997673	0.325428	0.810215	0.342888	0.996956	-0.729868	0.50152	1.28463	0.453772	0.472624	0.633945	-0.987249	0.521806	-0.762465	0.427581	-0.702405	0.725619	-0.13274	0.997151	-1.06913	0.522326	-0.241579	0.984689	-0.315039
Triglycerides__TG(16:1_28:0)	Triglycerides	TG(16:1_28:0)	0.211965	0.705186	-0.322447	0.99008	0.0773205	0.985243	-2.19222	0.0384233	-2.50663	0.237552	-0.150287	0.958479	-0.0269697	0.950492	0.454012	0.85786	-0.572066	0.976527	0.419166	0.633416	-0.139969	0.927401	-0.373962	0.997673	ND	ND	ND	ND	ND	ND	ND	ND	ND	ND	ND	ND	ND	ND	ND	ND	ND	ND	ND	ND	ND	ND	ND
Triglycerides__TG(16:1_30:1)	Triglycerides	TG(16:1_30:1)	0.294167	0.687127	-0.0473403	0.990615	-0.111114	0.985243	-2.55797	0.0626384	-3.24533	0.169529	-0.315884	0.933799	-0.235523	0.691003	0.329698	0.85786	-0.58321	0.976527	0.396745	0.686982	-0.248108	0.885379	-0.531152	0.997673	ND	ND	ND	ND	ND	ND	ND	ND	ND	ND	ND	ND	ND	ND	ND	ND	ND	ND	ND	ND	ND	ND	ND
Triglycerides__TG(16:1_32:0)	Triglycerides	TG(16:1_32:0)	0.180868	0.753096	-0.161627	0.990615	-0.0637223	0.985243	-2.67498	0.0330517	-2.98113	0.128844	-0.284328	0.933799	-0.279007	0.581197	0.47477	0.85786	-0.404813	0.976527	0.109168	0.893867	-0.0115978	0.999328	-0.410939	0.997673	ND	ND	ND	ND	ND	ND	0.58196	0.468228	ND	ND	ND	ND	ND	ND	ND	ND	ND	ND	ND	ND	ND	ND	-0.595079
Triglycerides__TG(16:1_32:1)	Triglycerides	TG(16:1_32:1)	0.26257	0.687127	-0.257459	0.990615	-0.12855	0.984885	-3.01063	0.0299716	-3.69436	0.152728	-0.338283	0.933799	-0.241825	0.608074	0.319932	0.85786	-0.580232	0.976527	0.187713	0.836405	-0.156064	0.927401	-0.479494	0.997673	ND	ND	ND	ND	-0.789894	0.618067	1.44146	0.359856	ND	ND	ND	ND	-0.544955	0.280252	0.578101	0.766152	ND	ND	2.53422	0.65114	-0.259957	0.984689	-0.261717
Triglycerides__TG(16:1_32:2)	Triglycerides	TG(16:1_32:2)	0.29257	0.672635	-0.131813	0.990615	0.0976256	0.985243	-2.64365	0.0330517	-2.83485	0.167396	-0.257835	0.938311	0.105957	0.81852	0.391451	0.85786	-0.433816	0.976527	0.308198	0.75594	0.0203725	0.999328	-0.447093	0.997673	ND	ND	ND	ND	ND	ND	ND	ND	ND	ND	ND	ND	ND	ND	ND	ND	ND	ND	ND	ND	ND	ND	ND
Triglycerides__TG(16:1_33:1)	Triglycerides	TG(16:1_33:1)	0.274531	0.675676	-0.101831	0.990615	0.204219	0.972143	-2.14619	0.0385154	-2.21043	0.167396	-0.121657	0.958479	0.154914	0.691461	0.417043	0.85786	-0.21731	0.976527	0.4613	0.614118	0.356962	0.755253	-0.348474	0.997673	ND	ND	ND	ND	ND	ND	ND	ND	ND	ND	ND	ND	ND	ND	ND	ND	ND	ND	ND	ND	ND	ND	ND
Triglycerides__TG(16:1_34:0)	Triglycerides	TG(16:1_34:0)	0.268792	0.693085	-0.00963305	0.993664	-0.314146	0.965729	-2.41254	0.0384233	-2.79112	0.117672	-0.565725	0.895328	-0.15483	0.766701	0.394908	0.85786	-0.532225	0.976527	0.254411	0.787667	0.115696	0.927401	-0.391236	0.997673	ND	ND	ND	ND	ND	ND	ND	ND	ND	ND	ND	ND	ND	ND	ND	ND	ND	ND	ND	ND	ND	ND	ND
Triglycerides__TG(16:1_34:1)	Triglycerides	TG(16:1_34:1)	0.326191	0.671843	-0.0228548	0.990615	-0.164467	0.980376	-2.51628	0.033333	-3.01493	0.128844	-0.578441	0.895328	-0.132696	0.789724	0.410431	0.85786	-0.537209	0.976527	0.33909	0.74437	0.0667224	0.97389	-0.355575	0.997673	0.916772	0.746672	ND	ND	-1.64113	0.50152	1.40415	0.358274	1.25888	0.576423	ND	ND	ND	ND	0.584133	0.728485	ND	ND	ND	ND	ND	ND	-1.30771
Triglycerides__TG(16:1_34:2)	Triglycerides	TG(16:1_34:2)	0.351623	0.671843	-0.0806178	0.990615	0.159603	0.980376	-2.42846	0.0299716	-2.67274	0.141654	-0.371942	0.901189	0.301355	0.449632	0.496249	0.85786	-0.343814	0.976527	0.572997	0.586776	0.241281	0.85749	-0.319485	0.997673	0.663242	0.746672	ND	ND	-1.32288	0.518407	1.59226	0.358274	0.354695	0.807322	ND	ND	-1.31691	0.163154	-0.700033	0.725619	0.358525	0.997151	-0.273723	0.725322	-1.08826	0.984689	-0.795326
Triglycerides__TG(16:1_34:3)	Triglycerides	TG(16:1_34:3)	0.399549	0.671843	-0.251168	0.990615	0.397178	0.965729	-2.70139	0.0299716	-2.91695	0.152728	-0.117485	0.962181	0.385743	0.360364	0.413991	0.85786	-0.216808	0.976527	0.615275	0.584786	0.29028	0.834402	-0.291633	0.997673	0.994976	0.746672	ND	ND	ND	ND	1.40728	0.338702	ND	ND	ND	ND	ND	ND	-0.282903	0.772751	ND	ND	ND	ND	ND	ND	-0.604419
Triglycerides__TG(16:1_36:1)	Triglycerides	TG(16:1_36:1)	0.451369	0.671843	0.154445	0.990615	-0.23846	0.965729	-2.15602	0.0512094	-2.56064	0.117672	-0.734452	0.895328	-0.0083883	0.98663	0.355257	0.85786	-0.577602	0.976527	0.471197	0.663618	0.286861	0.799457	-0.387292	0.997673	ND	ND	ND	ND	-1.49462	0.50152	ND	ND	0.696931	0.594527	ND	ND	ND	ND	0.693805	0.725619	ND	ND	ND	ND	ND	ND	-1
Triglycerides__TG(16:1_36:2)	Triglycerides	TG(16:1_36:2)	0.422708	0.671843	0.104578	0.990615	-0.169883	0.974836	-2.22055	0.0358203	-2.60797	0.122674	-0.758404	0.895328	0.156663	0.735869	0.318768	0.85786	-0.559585	0.976527	0.614641	0.592274	0.368521	0.738134	-0.433442	0.997673	1.04937	0.746672	ND	ND	-1.40178	0.50152	1.51382	0.338702	ND	ND	ND	ND	ND	ND	ND	ND	-0.00667509	0.997151	ND	ND	ND	ND	-0.883876
Triglycerides__TG(16:1_36:3)	Triglycerides	TG(16:1_36:3)	0.392347	0.671843	-0.0215209	0.990615	0.341073	0.965729	-2.17674	0.0299716	-2.27946	0.145326	-0.367199	0.895328	0.677603	0.170399	0.335956	0.85786	-0.246609	0.976527	0.949666	0.47386	0.556307	0.616637	-0.191073	0.997673	0.877749	0.746672	-0.0687659	0.996956	-1.39284	0.50152	1.63612	0.358274	0.64825	0.576423	-1.16832	0.559176	-1.09274	0.147897	-0.521125	0.725619	0.044579	0.997151	-0.892749	0.522326	0.533407	0.984689	-0.447663
Triglycerides__TG(16:1_36:4)	Triglycerides	TG(16:1_36:4)	0.434224	0.671843	0.0373339	0.990615	0.7479	0.94179	-1.96497	0.0299716	-1.85117	0.152728	0.136433	0.933799	1.04798	0.0485967	0.456008	0.85786	0.0435321	0.990931	1.0723	0.435068	0.715455	0.490577	-0.0927593	0.997673	0.544931	0.746672	-0.236652	0.996956	-1.11108	0.50152	1.31137	0.358274	0.67468	0.594527	-0.765535	0.559176	-1.26257	0.147897	-0.75202	0.725619	0.0431398	0.997151	-0.825238	0.522326	0.263327	0.984689	-0.317255
Triglycerides__TG(16:1_36:5)	Triglycerides	TG(16:1_36:5)	0.507657	0.671843	-0.287936	0.985602	0.913581	0.94179	-1.9432	0.0299716	-1.71642	0.169529	0.623899	0.885223	1.04395	0.0485967	0.26383	0.85786	0.00259578	0.998075	1.07188	0.435323	0.478113	0.683084	-0.20142	0.997673	0.485589	0.746672	-0.535635	0.996956	-1.21351	0.50152	1.28441	0.358274	0.483035	0.659052	-0.462249	0.738122	-1.33102	0.147897	-0.68226	0.725619	0.00608634	0.997151	ND	ND	-0.147364	0.984689	-0.36261
Triglycerides__TG(16:1_38:3)	Triglycerides	TG(16:1_38:3)	0.419321	0.671843	0.176106	0.990615	0.526611	0.94179	-1.50539	0.0582839	-1.49989	0.160691	-0.0160823	0.994724	0.753236	0.17726	0.398037	0.85786	0.000207687	0.999515	0.834259	0.464641	0.601024	0.500923	-0.0997434	0.997673	ND	ND	ND	ND	ND	ND	1.19754	0.338702	ND	ND	ND	ND	ND	ND	ND	ND	0.329982	0.997151	ND	ND	ND	ND	ND
Triglycerides__TG(16:1_38:4)	Triglycerides	TG(16:1_38:4)	0.350864	0.671843	0.322178	0.972936	0.667124	0.94179	-1.33823	0.0612693	-0.669672	0.430747	0.432952	0.895328	0.63209	0.255269	0.602843	0.85786	-0.150274	0.976527	0.628784	0.486831	0.490188	0.548028	-0.411132	0.997673	0.592903	0.746672	ND	ND	-1.20472	0.50152	1.30463	0.358274	0.690064	0.576423	-1.19827	0.521806	-0.778973	0.337813	-0.745016	0.725619	-0.211209	0.997151	ND	ND	ND	ND	-0.636391
Triglycerides__TG(16:1_38:5)	Triglycerides	TG(16:1_38:5)	0.360505	0.671843	0.216233	0.990615	0.855691	0.94179	-1.36891	0.106051	-1.12465	0.275111	0.827571	0.885223	0.496791	0.357788	0.470181	0.85786	-0.240754	0.976527	0.689528	0.491083	0.370501	0.739733	-0.469335	0.997673	0.746924	0.746672	-0.0306502	0.996956	-0.798902	0.58442	1.56399	0.358274	0.247243	0.812237	ND	ND	-0.822002	0.163154	-1	0.725619	ND	ND	-0.240314	0.727633	-0.168707	0.984689	-0.867862
Triglycerides__TG(17:0_32:1)	Triglycerides	TG(17:0_32:1)	0.277996	0.672635	0.0604019	0.990615	0.247582	0.965729	-1.75859	0.0299716	-1.46254	0.152728	0.0342769	0.980492	0.325091	0.464776	0.519345	0.85786	-0.0858378	0.980664	0.73148	0.435323	0.54534	0.588087	-0.167574	0.997673	ND	ND	ND	ND	ND	ND	ND	ND	ND	ND	ND	ND	ND	ND	ND	ND	ND	ND	ND	ND	ND	ND	ND
Triglycerides__TG(17:0_34:1)	Triglycerides	TG(17:0_34:1)	0.158979	0.763085	0.217863	0.983832	0.23595	0.965729	-1.63069	0.0407832	-1.50139	0.122674	-0.134582	0.950143	0.570592	0.356262	0.40112	0.85786	-0.0233053	0.996128	0.719418	0.479481	0.681178	0.45301	-0.144605	0.997673	ND	ND	ND	ND	ND	ND	ND	ND	ND	ND	ND	ND	ND	ND	ND	ND	ND	ND	ND	ND	ND	ND	ND
Triglycerides__TG(17:0_34:2)	Triglycerides	TG(17:0_34:2)	0.219642	0.700219	0.290962	0.960768	0.54598	0.94179	-1.61094	0.0299716	-1.37029	0.152728	0.0994787	0.970057	0.871102	0.234923	0.420596	0.85786	0.155418	0.976527	0.917381	0.435323	0.767477	0.390433	-0.0280479	0.997673	ND	ND	ND	ND	ND	ND	ND	ND	ND	ND	ND	ND	ND	ND	ND	ND	ND	ND	ND	ND	ND	ND	ND
Triglycerides__TG(17:0_34:3)	Triglycerides	TG(17:0_34:3)	0.128655	0.80905	0.172852	0.990615	0.60188	0.94179	-2.00291	0.0299716	-1.33002	0.214668	0.142737	0.938311	0.729899	0.170399	0.468695	0.85786	0.0880587	0.98203	1.13938	0.424733	0.808082	0.487946	-0.0315183	0.997673	ND	ND	ND	ND	ND	ND	ND	ND	ND	ND	ND	ND	ND	ND	ND	ND	ND	ND	ND	ND	ND	ND	ND
Triglycerides__TG(17:0_36:3)	Triglycerides	TG(17:0_36:3)	0.274571	0.693085	0.389304	0.881429	0.655132	0.94179	-1.51947	0.0321855	-1.01706	0.203422	-0.00240549	1	1.22341	0.152103	0.297291	0.85786	0.219729	0.976527	1.23284	0.424733	1.01714	0.366117	0.121188	0.997673	-0.0790994	0.946199	-0.0021711	0.996956	-0.506575	0.503736	1.48204	0.358274	0.429339	0.656626	ND	ND	ND	ND	-0.167757	0.875604	0.787339	0.997151	-0.223709	0.844183	ND	ND	-0.539903
Triglycerides__TG(17:0_36:4)	Triglycerides	TG(17:0_36:4)	0.0579542	0.917491	0.609102	0.800853	1.06378	0.94179	-1.30206	0.0412797	-0.661934	0.432581	0.379925	0.918129	1.36325	0.125899	0.507099	0.85786	0.313369	0.976527	1.22455	0.424733	1.14611	0.366117	0.0677605	0.997673	0.342307	0.842789	-0.0522197	0.996956	-0.664816	0.573749	1.44232	0.376849	0.94778	0.555357	-1.10483	0.521806	-0.615465	0.551394	-0.282339	0.788326	0.174029	0.997151	-0.720958	0.611781	-0.164361	0.984689	0.272253
Triglycerides__TG(17:1_32:1)	Triglycerides	TG(17:1_32:1)	0.266361	0.687127	-0.109054	0.990615	0.247388	0.965729	-1.98157	0.040941	-2.12597	0.176235	-0.0589325	0.974506	0.162174	0.701127	0.301311	0.85786	-0.195975	0.976527	0.795767	0.458399	0.188649	0.885379	-0.192246	0.997673	ND	ND	ND	ND	ND	ND	ND	ND	ND	ND	ND	ND	ND	ND	ND	ND	ND	ND	ND	ND	ND	ND	ND
Triglycerides__TG(17:1_34:1)	Triglycerides	TG(17:1_34:1)	0.272512	0.681677	0.0598958	0.990615	0.164543	0.972143	-1.97358	0.030799	-1.74426	0.152728	-0.449079	0.895328	0.339669	0.495139	0.546155	0.85786	-0.148144	0.976527	0.539438	0.537309	0.437356	0.671562	-0.276121	0.997673	ND	ND	ND	ND	ND	ND	ND	ND	ND	ND	ND	ND	ND	ND	ND	ND	ND	ND	ND	ND	ND	ND	ND
Triglycerides__TG(17:1_34:2)	Triglycerides	TG(17:1_34:2)	0.350181	0.671843	0.0335614	0.990615	0.472162	0.94179	-1.90217	0.0299716	-1.93396	0.152728	-0.0928415	0.958486	0.745623	0.152103	0.317636	0.85786	-0.0335407	0.990931	0.859255	0.458399	0.533242	0.606962	-0.105216	0.997673	ND	ND	ND	ND	ND	ND	1.19157	0.358274	ND	ND	ND	ND	ND	ND	ND	ND	ND	ND	ND	ND	ND	ND	ND
Triglycerides__TG(17:1_34:3)	Triglycerides	TG(17:1_34:3)	0.356466	0.671843	-0.200771	0.990615	0.665626	0.94179	-2.00571	0.0299716	-1.71656	0.259581	0.153654	0.933799	0.712994	0.105342	0.268163	0.85786	0.10839	0.976527	1.14455	0.424733	0.477301	0.691403	-0.131835	0.997673	ND	ND	ND	ND	ND	ND	ND	ND	ND	ND	ND	ND	ND	ND	ND	ND	ND	ND	ND	ND	ND	ND	ND
Triglycerides__TG(17:1_36:3)	Triglycerides	TG(17:1_36:3)	0.335286	0.671843	0.253885	0.972936	0.643058	0.94179	-1.51416	0.0323514	-1.18575	0.204538	0.0350597	0.979948	1.06093	0.0915274	0.483279	0.85786	0.143906	0.976527	1.18642	0.424733	0.925864	0.385725	-0.045778	0.997673	ND	ND	ND	ND	ND	ND	ND	ND	ND	ND	ND	ND	ND	ND	ND	ND	ND	ND	ND	ND	ND	ND	ND
Triglycerides__TG(17:1_36:4)	Triglycerides	TG(17:1_36:4)	0.385107	0.671843	0.271187	0.960768	1.0076	0.94179	-1.4167	0.040941	-0.804023	0.419413	0.324659	0.918129	1.38668	0.0485967	0.306846	0.85786	0.18896	0.976527	1.34064	0.424733	0.932666	0.385725	-0.0105538	0.997673	-0.00628626	0.992839	ND	ND	-0.992029	0.50152	1.47418	0.358274	ND	ND	-0.910893	0.527614	ND	ND	ND	ND	-0.335984	0.997151	ND	ND	ND	ND	-0.730983
Triglycerides__TG(17:1_36:5)	Triglycerides	TG(17:1_36:5)	0.154886	0.80905	ND	ND	0.802473	0.94179	ND	ND	ND	ND	0.00486576	0.999946	0.685566	0.310096	0.915466	0.85786	-0.298561	0.976527	0.968091	0.424733	1.05354	0.385725	ND	ND	ND	ND	ND	ND	ND	ND	ND	ND	ND	ND	ND	ND	ND	ND	ND	ND	ND	ND	ND	ND	ND	ND	ND
Triglycerides__TG(17:1_38:5)	Triglycerides	TG(17:1_38:5)	0.256596	0.687127	0.034342	0.990615	0.648221	0.94179	-0.12253	0.8192	-0.651115	0.436109	0.280536	0.918129	0.396193	0.488988	-0.350497	0.85786	-0.334736	0.976527	0.760993	0.424733	-0.239466	0.799457	-0.0220263	0.997673	0.20482	0.857992	-0.104697	0.996956	ND	ND	1.25178	0.358274	-0.68966	0.576423	ND	ND	0.509674	0.58875	-0.915936	0.725619	ND	ND	0.139725	0.908731	0.263034	0.984689	ND
Triglycerides__TG(17:1_38:6)	Triglycerides	TG(17:1_38:6)	ND	ND	ND	ND	0.32288	0.94179	ND	ND	ND	ND	-0.107037	0.938311	ND	ND	ND	ND	-0.0272366	0.996128	ND	ND	ND	ND	ND	ND	ND	ND	ND	ND	ND	ND	ND	ND	ND	ND	ND	ND	ND	ND	ND	ND	ND	ND	ND	ND	ND	ND	ND
Triglycerides__TG(17:2_34:2)	Triglycerides	TG(17:2_34:2)	0.291902	0.692099	0.338909	0.936974	0.517088	0.94179	-1.36898	0.112868	-1.16863	0.230777	0.158557	0.933799	0.796489	0.266435	0.371648	0.85786	0.0030663	0.998075	1.20112	0.424733	0.437527	0.640059	0.287552	0.997673	ND	ND	ND	ND	ND	ND	ND	ND	ND	ND	ND	ND	ND	ND	ND	ND	ND	ND	ND	ND	ND	ND	ND
Triglycerides__TG(17:2_34:3)	Triglycerides	TG(17:2_34:3)	0.0288915	0.915803	ND	ND	0.69183	0.94179	ND	ND	ND	ND	-0.0335994	0.973119	0.187086	0.434949	ND	ND	-0.25985	0.976527	0.536903	0.444278	ND	ND	0.0289338	0.997673	ND	ND	ND	ND	ND	ND	ND	ND	ND	ND	ND	ND	ND	ND	ND	ND	ND	ND	ND	ND	ND	ND	ND
Triglycerides__TG(17:2_36:2)	Triglycerides	TG(17:2_36:2)	0.596785	0.640379	0.265766	0.969012	0.32624	0.965729	-0.882567	0.269935	-0.959268	0.177656	0.053466	0.973119	1.05491	0.17726	0.193304	0.85786	-0.100588	0.976527	1.44649	0.416137	0.691487	0.390433	-0.037281	0.997673	ND	ND	ND	ND	ND	ND	ND	ND	ND	ND	ND	ND	ND	ND	ND	ND	ND	ND	ND	ND	ND	ND	ND
Triglycerides__TG(17:2_36:3)	Triglycerides	TG(17:2_36:3)	0.357316	0.671843	0.473813	0.856627	0.906964	0.94179	ND	ND	-0.22777	0.544582	0.126406	0.938311	1.15641	0.144099	0.452725	0.85786	0.220022	0.976527	1.20605	0.424733	0.852896	0.366117	0.267863	0.997673	ND	ND	ND	ND	ND	ND	1.05321	0.358274	ND	ND	ND	ND	ND	ND	ND	ND	ND	ND	0.0652177	0.931573	0.685364	0.583241	ND
Triglycerides__TG(17:2_36:4)	Triglycerides	TG(17:2_36:4)	0.428447	0.671843	-0.130755	0.990615	0.404893	0.94179	-0.709724	0.209777	-0.863275	0.128844	0.139163	0.938311	0.766531	0.231604	-0.0270074	0.975632	0.139952	0.976527	1.18247	0.424733	0.223248	0.691403	0.247882	0.997673	ND	ND	ND	ND	ND	ND	ND	ND	ND	ND	ND	ND	ND	ND	ND	ND	ND	ND	ND	ND	ND	ND	ND
Triglycerides__TG(17:2_38:5)	Triglycerides	TG(17:2_38:5)	0.139499	0.848874	-0.859509	0.447716	-0.499052	0.965729	ND	ND	-1.36879	0.117672	-0.732578	0.893472	-0.178003	0.75901	-0.582615	0.85786	-0.701005	0.976527	0.439244	0.485912	-0.445911	0.715341	ND	ND	ND	ND	ND	ND	ND	ND	ND	ND	ND	ND	ND	ND	ND	ND	ND	ND	ND	ND	ND	ND	ND	ND	ND
Triglycerides__TG(17:2_38:6)	Triglycerides	TG(17:2_38:6)	0.123367	0.716008	0.484834	0.537055	0.361391	0.94179	ND	ND	ND	ND	0.039856	0.973119	0.152337	0.417136	ND	ND	ND	ND	0.340891	0.432254	0.358765	0.711466	ND	ND	ND	ND	ND	ND	ND	ND	ND	ND	ND	ND	ND	ND	ND	ND	ND	ND	ND	ND	ND	ND	ND	ND	ND
Triglycerides__TG(18:0_30:0)	Triglycerides	TG(18:0_30:0)	0.144187	0.822617	0.0884011	0.990615	-0.165421	0.972143	-1.42087	0.108355	-1.72383	0.117672	-0.361361	0.918129	0.156851	0.833903	0.323589	0.85786	-0.286224	0.976527	0.543042	0.517469	0.315264	0.743646	-0.319986	0.997673	ND	ND	ND	ND	ND	ND	ND	ND	ND	ND	ND	ND	ND	ND	ND	ND	ND	ND	ND	ND	ND	ND	ND
Triglycerides__TG(18:0_30:1)	Triglycerides	TG(18:0_30:1)	0.412663	0.671843	-0.0525969	0.990615	-0.194565	0.972143	-1.9208	0.0582839	-2.4714	0.117672	-0.543419	0.895328	0.0436269	0.947623	0.37698	0.85786	-0.489012	0.976527	0.32353	0.732748	0.102122	0.932964	-0.388625	0.997673	ND	ND	ND	ND	ND	ND	ND	ND	ND	ND	ND	ND	ND	ND	ND	ND	ND	ND	ND	ND	ND	ND	ND
Triglycerides__TG(18:0_32:0)	Triglycerides	TG(18:0_32:0)	0.131269	0.846702	0.0478465	0.990615	-0.162037	0.972143	-1.4427	0.114155	-1.95919	0.11275	-0.355229	0.918129	0.0660535	0.932741	0.292496	0.85786	-0.272342	0.976527	0.270649	0.75594	0.413869	0.67394	-0.296292	0.997673	ND	ND	ND	ND	ND	ND	ND	ND	ND	ND	ND	ND	ND	ND	ND	ND	ND	ND	ND	ND	ND	ND	ND
Triglycerides__TG(18:0_32:1)	Triglycerides	TG(18:0_32:1)	0.259644	0.704085	0.0128414	0.990615	-0.225533	0.965729	-2.01153	0.0638831	-2.35346	0.117672	-0.492449	0.895328	-0.0505251	0.946184	0.321111	0.85786	-0.439932	0.976527	0.259024	0.786285	0.162577	0.885379	-0.356812	0.997673	ND	ND	ND	ND	ND	ND	ND	ND	ND	ND	ND	ND	ND	ND	ND	ND	ND	ND	ND	ND	ND	ND	ND
Triglycerides__TG(18:0_32:2)	Triglycerides	TG(18:0_32:2)	0.288246	0.687127	0.211812	0.990615	0.154842	0.974836	-1.70642	0.0626242	-1.745	0.122674	-0.267425	0.928167	0.473222	0.549009	0.383554	0.85786	-0.121624	0.976527	0.428828	0.6423	0.384592	0.680672	-0.245764	0.997673	ND	ND	ND	ND	ND	ND	ND	ND	ND	ND	ND	ND	ND	ND	ND	ND	ND	ND	ND	ND	ND	ND	-0.694935
Triglycerides__TG(18:0_34:2)	Triglycerides	TG(18:0_34:2)	0.238491	0.702419	0.29367	0.960768	0.119362	0.980376	-1.79115	0.0429407	-1.58633	0.123551	-0.345088	0.916747	0.524518	0.493863	0.349529	0.85786	-0.136405	0.976527	0.607302	0.525635	0.535953	0.568938	-0.230771	0.997673	-0.0487993	0.946199	ND	ND	-1.14329	0.50152	1.13649	0.358274	0.732287	0.576423	ND	ND	-0.969926	0.147897	0.420865	0.799518	0.727135	0.997151	-0.614044	0.522326	-0.543057	0.984689	-0.424194
Triglycerides__TG(18:0_34:3)	Triglycerides	TG(18:0_34:3)	0.394513	0.671843	0.143967	0.990615	0.282033	0.965729	-2.01614	0.0299716	-1.80814	0.128844	-0.202468	0.933799	0.525567	0.356761	0.397814	0.85786	-0.15717	0.976527	0.730016	0.485912	0.451317	0.616637	-0.161659	0.997673	ND	ND	ND	ND	-1.06324	0.50152	1.50428	0.11361	ND	ND	ND	ND	ND	ND	0.154723	0.887574	0.323614	0.997151	ND	ND	ND	ND	-0.761229
Triglycerides__TG(18:0_36:1)	Triglycerides	TG(18:0_36:1)	0.424394	0.687127	0.459113	0.881429	-0.231585	0.965729	-1.2434	0.242141	-1.50728	0.128844	-0.696501	0.895328	0.342523	0.728443	0.26512	0.85786	-0.380473	0.976527	0.444411	0.66166	0.666906	0.515994	-0.224865	0.997673	ND	ND	ND	ND	ND	ND	ND	ND	ND	ND	ND	ND	ND	ND	ND	ND	ND	ND	ND	ND	ND	ND	-0.869729
Triglycerides__TG(18:0_36:2)	Triglycerides	TG(18:0_36:2)	0.411697	0.671843	0.455511	0.881429	-0.195978	0.971529	-1.43766	0.112648	-1.45568	0.117672	-0.687425	0.895328	0.559682	0.5429	0.297498	0.85786	-0.21987	0.976527	0.677126	0.517469	0.672003	0.490577	-0.23241	0.997673	ND	ND	ND	ND	ND	ND	ND	ND	ND	ND	ND	ND	ND	ND	ND	ND	ND	ND	ND	ND	ND	ND	ND
Triglycerides__TG(18:0_36:3)	Triglycerides	TG(18:0_36:3)	0.286182	0.687127	0.425153	0.881429	0.286959	0.965729	-1.44839	0.0626242	-1.23897	0.160691	-0.311985	0.918129	0.857771	0.342687	0.358096	0.85786	0.100092	0.986837	0.820297	0.458399	0.787196	0.390433	-0.0469801	0.997673	-0.215168	0.831426	0.459069	0.996956	-0.908918	0.50152	1.13077	0.393863	1.23618	0.576423	ND	ND	-0.860466	0.163154	0.123796	0.881193	0.948013	0.997151	-0.693215	0.534988	ND	ND	-0.171953
Triglycerides__TG(18:0_36:4)	Triglycerides	TG(18:0_36:4)	0.167483	0.759434	0.551719	0.800853	0.611214	0.94179	-1.57946	0.033333	-0.942808	0.263279	-0.0166684	0.995062	1.19332	0.231604	0.373677	0.85786	0.314066	0.976527	1.09695	0.424733	0.919797	0.385725	0.0242089	0.997673	-0.0714176	0.953969	0.39168	0.996956	-1.04953	0.50152	1.21306	0.451736	1.07777	0.576423	-1.15742	0.559176	-0.951698	0.380049	-0.179706	0.766152	0.674699	0.997151	-0.494062	0.715497	0.28054	0.984689	-0.248785
Triglycerides__TG(18:0_36:5)	Triglycerides	TG(18:0_36:5)	0.458098	0.671843	0.398287	0.914131	0.764042	0.94179	-1.5303	0.0299716	-0.601882	0.448184	0.379924	0.918129	1.13707	0.223232	0.434341	0.85786	0.266384	0.976527	1.12638	0.424733	0.839627	0.366117	-0.220382	0.997673	ND	ND	ND	ND	ND	ND	ND	ND	ND	ND	ND	ND	ND	ND	ND	ND	ND	ND	ND	ND	ND	ND	ND
Triglycerides__TG(18:0_38:6)	Triglycerides	TG(18:0_38:6)	0.26953	0.693085	0.935885	0.705979	0.730851	0.94179	-0.767672	0.194491	0.273953	0.801527	0.582842	0.895328	0.970003	0.324089	0.39786	0.85786	0.486334	0.976527	1.07454	0.368018	0.81161	0.490577	-0.0839583	0.997673	-0.320915	0.746672	0.33505	0.996956	ND	ND	0.983698	0.467567	1.06094	0.555357	ND	ND	ND	ND	ND	ND	ND	ND	ND	ND	ND	ND	-0.132763
Triglycerides__TG(18:0_38:7)	Triglycerides	TG(18:0_38:7)	-0.126054	0.71257	ND	ND	0.330855	0.94179	ND	ND	ND	ND	0.458527	0.893472	0.444621	0.531288	ND	ND	0.212408	0.976527	0.518304	0.424733	ND	ND	ND	ND	ND	ND	ND	ND	ND	ND	ND	ND	ND	ND	ND	ND	ND	ND	ND	ND	ND	ND	ND	ND	ND	ND	ND
Triglycerides__TG(18:1_26:0)	Triglycerides	TG(18:1_26:0)	-0.0648172	0.905205	-0.114398	0.990615	0.458802	0.94179	-1.74471	0.0509053	-1.52159	0.150083	0.0703463	0.973119	0.561595	0.342687	0.416271	0.85786	-0.0281147	0.996128	0.541692	0.479481	0.491958	0.711466	-0.0324181	0.997673	ND	ND	ND	ND	ND	ND	ND	ND	ND	ND	ND	ND	ND	ND	ND	ND	ND	ND	ND	ND	ND	ND	ND
Triglycerides__TG(18:1_28:1)	Triglycerides	TG(18:1_28:1)	0.179928	0.727284	-0.143753	0.990615	0.113904	0.980376	-1.95335	0.0299716	-2.45825	0.117672	-0.355523	0.901189	0.564931	0.285172	0.288978	0.85786	-0.266799	0.976527	0.501218	0.605163	0.348123	0.792907	-0.199551	0.997673	ND	ND	ND	ND	ND	ND	ND	ND	ND	ND	ND	ND	ND	ND	ND	ND	ND	ND	ND	ND	ND	ND	ND
Triglycerides__TG(18:1_30:0)	Triglycerides	TG(18:1_30:0)	0.24774	0.704085	0.0414268	0.990615	-0.0852619	0.984885	-1.9719	0.0621254	-2.44271	0.117672	-0.567724	0.895328	0.0485671	0.939803	0.378066	0.85786	-0.421204	0.976527	0.251728	0.787667	0.0851166	0.935518	-0.393017	0.997673	ND	ND	ND	ND	ND	ND	ND	ND	ND	ND	ND	ND	ND	ND	ND	ND	ND	ND	ND	ND	ND	ND	ND
Triglycerides__TG(18:1_30:1)	Triglycerides	TG(18:1_30:1)	0.375893	0.671843	-0.0888513	0.990615	-0.156712	0.980376	-2.21074	0.0429407	-2.59785	0.152728	-0.605736	0.895328	0.0522219	0.922235	0.279096	0.85786	-0.557239	0.976527	0.315736	0.75594	-0.000882562	1	-0.412957	0.997673	ND	ND	ND	ND	ND	ND	ND	ND	ND	ND	ND	ND	ND	ND	ND	ND	ND	ND	ND	ND	ND	ND	ND
Triglycerides__TG(18:1_30:2)	Triglycerides	TG(18:1_30:2)	0.312712	0.687127	0.0334897	0.990615	0.332566	0.965729	-1.82163	0.0299716	-1.88633	0.160974	-0.288386	0.918129	0.806869	0.170399	0.321928	0.85786	-0.258874	0.976527	0.702741	0.48956	0.406228	0.714738	-0.215972	0.997673	ND	ND	ND	ND	ND	ND	ND	ND	ND	ND	ND	ND	ND	ND	ND	ND	ND	ND	ND	ND	ND	ND	ND
Triglycerides__TG(18:1_31:0)	Triglycerides	TG(18:1_31:0)	ND	ND	ND	ND	0.386335	0.94179	ND	ND	ND	ND	ND	ND	ND	ND	ND	ND	0.0627002	0.976527	ND	ND	ND	ND	ND	ND	ND	ND	ND	ND	ND	ND	ND	ND	ND	ND	ND	ND	ND	ND	ND	ND	ND	ND	ND	ND	ND	ND	ND
Triglycerides__TG(18:1_32:0)	Triglycerides	TG(18:1_32:0)	0.206747	0.735531	0.067958	0.990615	-0.0980191	0.980376	-1.94859	0.0526005	-2.18364	0.117672	-0.503895	0.895328	0.0545301	0.928706	0.389327	0.85786	-0.308395	0.976527	0.26167	0.75594	0.212108	0.81376	-0.303181	0.997673	ND	ND	ND	ND	ND	ND	ND	ND	ND	ND	ND	ND	ND	ND	ND	ND	ND	ND	ND	ND	ND	ND	ND
Triglycerides__TG(18:1_32:1)	Triglycerides	TG(18:1_32:1)	0.336636	0.671843	0.0174178	0.990615	-0.196837	0.972143	-2.24887	0.0443584	-2.80123	0.117672	-0.673071	0.895328	-0.065095	0.904509	0.400591	0.85786	-0.506377	0.976527	0.283571	0.761455	0.0592999	0.97389	-0.448674	0.997673	ND	ND	ND	ND	ND	ND	ND	ND	ND	ND	ND	ND	ND	ND	ND	ND	ND	ND	ND	ND	ND	ND	-1.10865
Triglycerides__TG(18:1_32:2)	Triglycerides	TG(18:1_32:2)	0.357588	0.671843	0.0197955	0.990615	0.11874	0.980376	-2.06833	0.0299716	-2.41571	0.128844	-0.473874	0.895328	0.491754	0.342687	0.320029	0.85786	-0.30315	0.976527	0.630453	0.542246	0.282934	0.799457	-0.321152	0.997673	ND	ND	ND	ND	-1.15925	0.50152	1.62709	0.358274	0.535696	0.656626	ND	ND	ND	ND	ND	ND	0.204281	0.997151	ND	ND	ND	ND	-0.678278
Triglycerides__TG(18:1_32:3)	Triglycerides	TG(18:1_32:3)	0.368169	0.671843	-0.0418338	0.990615	0.395308	0.965729	-1.80311	0.0358203	-1.91351	0.128844	-0.0915718	0.964905	0.734564	0.198152	0.283905	0.85786	-0.0953924	0.976527	0.760055	0.479481	0.474265	0.605693	-0.181389	0.997673	0.403496	0.746672	ND	ND	ND	ND	1.03653	0.358274	ND	ND	ND	ND	ND	ND	ND	ND	ND	ND	ND	ND	ND	ND	ND
Triglycerides__TG(18:1_33:0)	Triglycerides	TG(18:1_33:0)	0.093547	0.849678	0.175608	0.990615	0.173812	0.972143	-1.72998	0.0319392	-1.21147	0.160691	-0.239041	0.918129	0.611791	0.355724	0.30934	0.85786	-0.152946	0.976527	0.612891	0.504402	0.694859	0.490577	-0.156094	0.997673	ND	ND	ND	ND	ND	ND	ND	ND	ND	ND	ND	ND	ND	ND	ND	ND	ND	ND	ND	ND	ND	ND	ND
Triglycerides__TG(18:1_33:1)	Triglycerides	TG(18:1_33:1)	0.355267	0.671843	0.134731	0.990615	0.219102	0.965729	-1.86763	0.033333	-1.51512	0.152728	-0.306983	0.895328	0.579172	0.323222	0.375421	0.85786	-0.0965877	0.976527	0.802999	0.466288	0.633364	0.523848	-0.195263	0.997673	ND	ND	ND	ND	ND	ND	1.72693	0.338702	ND	ND	ND	ND	-0.321928	0.65034	-0.134365	0.914215	ND	ND	ND	ND	ND	ND	ND
Triglycerides__TG(18:1_33:2)	Triglycerides	TG(18:1_33:2)	0.371233	0.671843	0.359573	0.94246	0.548655	0.94179	-1.66679	0.0299716	-1.41739	0.152728	0.0695761	0.973119	1.04513	0.107298	0.3628	0.85786	0.0601907	0.987879	1.09481	0.424733	0.881237	0.385725	-0.0825626	0.997673	0.880138	0.746672	ND	ND	ND	ND	1.7828	0.358274	ND	ND	ND	ND	ND	ND	ND	ND	ND	ND	ND	ND	ND	ND	-0.511309
Triglycerides__TG(18:1_33:3)	Triglycerides	TG(18:1_33:3)	0.151797	0.753096	0.172522	0.990615	0.769963	0.94179	-1.17977	0.030799	-0.922203	0.31857	0.201158	0.933799	1.0293	0.0915274	0.318024	0.85786	0.0740972	0.987879	1.06001	0.424733	0.877161	0.387724	-0.0551667	0.997673	ND	ND	ND	ND	ND	ND	ND	ND	ND	ND	ND	ND	ND	ND	ND	ND	ND	ND	ND	ND	ND	ND	ND
Triglycerides__TG(18:1_34:1)	Triglycerides	TG(18:1_34:1)	0.417905	0.671843	0.144977	0.990615	-0.113852	0.980376	-1.80814	0.06657	-2.17623	0.117672	-0.696062	0.893472	0.239601	0.683484	0.328717	0.85786	-0.432875	0.976527	0.491851	0.607609	0.341753	0.691403	-0.302331	0.997673	0.648639	0.746672	-0.232348	0.996956	-1.12094	0.50152	1.77534	0.358274	0.287882	0.812237	ND	ND	-1.14358	0.209309	-0.701889	0.725619	0.323679	0.997151	ND	ND	-0.6778	0.984689	-0.705907
Triglycerides__TG(18:1_34:2)	Triglycerides	TG(18:1_34:2)	0.345312	0.671843	0.119988	0.990615	0.178607	0.972143	-1.8858	0.030799	-1.93789	0.122674	-0.471776	0.895328	0.574861	0.299924	0.380019	0.85786	-0.202215	0.976527	0.671971	0.485912	0.459266	0.588087	-0.224426	0.997673	0.831722	0.746672	0.361809	0.996956	-1.27357	0.50152	2.01441	0.358274	0.877164	0.576423	ND	ND	-1.11044	0.247067	-0.722283	0.725619	-0.0127039	0.997151	-0.445238	0.715497	0.222771	0.984689	-0.514842
Triglycerides__TG(18:1_34:3)	Triglycerides	TG(18:1_34:3)	0.400351	0.671843	0.0169488	0.990615	0.363764	0.965729	-2.0705	0.0299716	-2.15749	0.142393	-0.252907	0.918129	0.695145	0.176138	0.407357	0.85786	-0.182684	0.976527	0.874469	0.475009	0.571848	0.600349	-0.176929	0.997673	0.768064	0.746672	0.113323	0.996956	-1.14456	0.50152	1.79144	0.358274	0.881452	0.576423	-1.12925	0.559176	-1.19912	0.163154	-0.535814	0.725619	0.0725022	0.997151	-0.708652	0.556452	0.322061	0.984689	-0.499643
Triglycerides__TG(18:1_34:4)	Triglycerides	TG(18:1_34:4)	0.476953	0.671843	0.0439839	0.990615	0.604103	0.94179	-1.90616	0.0323514	-1.66439	0.152728	0.200901	0.918129	0.779384	0.125899	0.408595	0.85786	-0.0809046	0.976527	0.958992	0.444278	0.59306	0.574695	-0.273477	0.997673	0.370146	0.746672	0.0822241	0.996956	-0.809302	0.555799	1.37166	0.358274	0.800699	0.576423	ND	ND	-0.747677	0.281346	-0.584963	0.725619	ND	ND	-0.640761	0.522973	0.273351	0.984689	0.0542172
Triglycerides__TG(18:1_35:2)	Triglycerides	TG(18:1_35:2)	0.3681	0.671843	0.298756	0.960768	0.342589	0.965729	-1.626	0.0384233	-1.53295	0.141654	-0.227318	0.918129	0.845924	0.224394	0.334731	0.85786	-0.0609041	0.987879	1.00985	0.435323	0.815941	0.390433	-0.128302	0.997673	0.384938	0.784509	0.277209	0.996956	-1.18177	0.50152	1.329	0.39263	0.759508	0.576423	ND	ND	-0.46158	0.380049	ND	ND	ND	ND	ND	ND	ND	ND	-0.471561
Triglycerides__TG(18:1_35:3)	Triglycerides	TG(18:1_35:3)	0.346117	0.671843	0.177514	0.990615	0.677549	0.94179	-1.58388	0.0299716	-1.55994	0.152728	0.0590001	0.973119	1.11818	0.107298	0.275464	0.85786	0.179141	0.976527	1.20306	0.424733	0.774743	0.482441	0.064279	0.997673	0.813069	0.746672	ND	ND	-0.777608	0.50152	1.8392	0.358274	0.670856	0.73126	ND	ND	0.0297473	0.943927	-0.789078	0.725619	ND	ND	ND	ND	0.471882	0.984689	-0.713619
Triglycerides__TG(18:1_36:0)	Triglycerides	TG(18:1_36:0)	0.449478	0.671843	0.441303	0.896395	-0.218312	0.965729	-0.993504	0.259868	-1.19283	0.122674	-0.685374	0.895328	0.449971	0.580024	0.310099	0.85786	-0.337714	0.976527	0.884719	0.435323	0.628204	0.51461	-0.0125283	0.997673	ND	ND	ND	ND	ND	ND	ND	ND	ND	ND	ND	ND	ND	ND	ND	ND	ND	ND	ND	ND	ND	ND	ND
Triglycerides__TG(18:1_36:1)	Triglycerides	TG(18:1_36:1)	0.434362	0.671843	0.333175	0.960768	-0.263466	0.965729	-1.52336	0.102681	-1.77721	0.117672	-0.876759	0.893472	0.438121	0.570492	0.307146	0.85786	-0.40888	0.976527	0.697177	0.517469	0.56024	0.558854	-0.351855	0.997673	ND	ND	ND	ND	-0.843101	0.554678	1.64687	0.11361	ND	ND	ND	ND	ND	ND	ND	ND	ND	ND	ND	ND	ND	ND	-0.54149
Triglycerides__TG(18:1_36:2)	Triglycerides	TG(18:1_36:2)	0.458142	0.671843	0.297554	0.963415	-0.089002	0.984885	-1.52409	0.0951481	-1.87961	0.117672	-0.817802	0.893472	0.590371	0.380536	0.329369	0.85786	-0.402335	0.976527	0.825279	0.479481	0.639134	0.506393	-0.294672	0.997673	0.353333	0.850776	ND	ND	-1.14035	0.544863	1.43584	0.358274	1.06215	0.576423	ND	ND	-1.01831	0.163154	-0.153911	0.90404	0.689256	0.997151	-0.433883	0.715497	0.208954	0.984689	-0.602422
Triglycerides__TG(18:1_36:3)	Triglycerides	TG(18:1_36:3)	0.39571	0.671843	0.318394	0.960768	0.314866	0.965729	-1.5291	0.0367436	-1.45451	0.141654	-0.42873	0.895328	1.00672	0.176138	0.404604	0.85786	-0.100206	0.976527	1.13099	0.434535	0.903917	0.366117	-0.101861	0.997673	0.792886	0.746672	0.0217574	0.996956	-0.97952	0.50152	1.69994	0.358274	0.866437	0.576423	-1.07889	0.559176	-0.993555	0.247067	-0.448836	0.725619	0.48739	0.997151	-0.122793	0.931483	0.663119	0.984689	-0.33922
Triglycerides__TG(18:1_36:4)	Triglycerides	TG(18:1_36:4)	0.263441	0.697045	0.417524	0.881429	0.798406	0.94179	-1.56836	0.0318961	-1.12238	0.200579	-0.0360315	0.983604	1.36693	0.0954015	0.419823	0.85786	0.180599	0.976527	1.35636	0.424733	1.05119	0.366117	0.0476019	0.997673	0.424982	0.746672	0.252105	0.996956	-0.859565	0.509371	1.5876	0.358274	0.909864	0.576423	-1.16363	0.521806	-1.12488	0.281346	-0.551997	0.725619	0.379046	0.997151	-0.415781	0.734582	0.505124	0.984689	-0.24709
Triglycerides__TG(18:1_36:5)	Triglycerides	TG(18:1_36:5)	0.393491	0.671843	0.320602	0.960768	0.981988	0.94179	-1.53766	0.0330517	-0.93372	0.310696	0.392782	0.895328	1.36006	0.0516221	0.394105	0.85786	0.150421	0.976527	1.38582	0.424733	0.976613	0.366117	-0.0600468	0.997673	0.273993	0.800079	0.0647852	0.996956	-0.851836	0.509371	1.33757	0.370153	0.700415	0.576423	-0.976162	0.522489	-1.11179	0.230778	-0.693641	0.725619	-0.0241663	0.997151	-0.582194	0.56576	0.0508186	0.984689	-0.191981
Triglycerides__TG(18:1_36:6)	Triglycerides	TG(18:1_36:6)	0.75468	0.484629	0.33273	0.920125	0.995742	0.94179	-1.22455	0.0299716	-0.423075	0.48395	0.525329	0.893472	1.23653	0.0915274	0.321928	0.85786	0.165399	0.976527	1.41665	0.424733	0.906074	0.385725	0.0965254	0.997673	0.316172	0.746672	0.065169	0.996956	-0.989042	0.50152	1.21321	0.358274	0.370069	0.674829	-0.603699	0.559176	-0.826887	0.247067	-0.461477	0.725619	-0.661415	0.997151	ND	ND	0.167267	0.984689	-0.481945
Triglycerides__TG(18:1_38:5)	Triglycerides	TG(18:1_38:5)	0.509962	0.671843	0.731357	0.781258	0.668883	0.94179	-0.700925	0.307201	-0.300873	0.763332	0.388297	0.895328	0.958552	0.296235	0.431735	0.85786	0.0797018	0.990931	0.905286	0.435323	0.779517	0.385725	-0.471438	0.997673	0.583851	0.746672	-0.159665	0.996956	-0.87282	0.50152	1.51719	0.370153	0.750362	0.576423	-1.45675	0.521806	-0.965235	0.380049	-0.816548	0.725619	-0.372302	0.997151	-0.53939	0.670886	0.00960514	0.989441	-0.785875
Triglycerides__TG(18:1_38:6)	Triglycerides	TG(18:1_38:6)	0.48836	0.671843	0.80681	0.776034	0.798928	0.94179	-0.866595	0.102652	-0.122587	0.923543	0.535894	0.895328	1.1522	0.21719	0.377347	0.85786	0.198597	0.976527	1.11074	0.424733	0.893158	0.366117	-0.362385	0.997673	0.364787	0.746672	0.0815081	0.996956	-0.849015	0.50152	1.11616	0.424831	0.50128	0.671212	-0.867649	0.521806	-0.92327	0.380049	-0.675143	0.725619	-0.57369	0.997151	-0.932265	0.522973	0.0525146	0.984689	-0.174776
Triglycerides__TG(18:1_38:7)	Triglycerides	TG(18:1_38:7)	0.113003	0.806567	0.509293	0.800853	0.562258	0.94179	-0.912035	0.153911	-0.216763	0.786081	0.43546	0.895328	0.765559	0.324873	0.388572	0.85786	-0.0477955	0.996128	0.954236	0.424733	0.893323	0.500923	0.716995	0.997673	0.129451	0.87464	0.404878	0.996956	-1.11145	0.50152	1.31032	0.358274	0.49048	0.57852	-0.75725	0.521806	ND	ND	-0.547488	0.725619	-0.644328	0.997151	ND	ND	0.457436	0.984689	-0.347841
Triglycerides__TG(18:2_28:0)	Triglycerides	TG(18:2_28:0)	0.272701	0.696321	0.0116818	0.990615	0.568236	0.94179	-1.69812	0.0464535	-1.80932	0.140333	-0.0446593	0.979948	0.84537	0.218458	0.539285	0.85786	0.0117813	0.998075	0.491054	0.57789	0.348426	0.715341	-0.171855	0.997673	ND	ND	ND	ND	ND	ND	ND	ND	ND	ND	ND	ND	ND	ND	ND	ND	ND	ND	ND	ND	ND	ND	ND
Triglycerides__TG(18:2_30:0)	Triglycerides	TG(18:2_30:0)	0.239998	0.700103	0.0179581	0.990615	0.423574	0.94179	-1.86555	0.0358203	-1.94406	0.128844	-0.178889	0.933799	0.574388	0.354742	0.447215	0.85786	-0.00257089	0.998075	0.513561	0.567355	0.28773	0.737028	-0.168267	0.997673	ND	ND	ND	ND	ND	ND	ND	ND	ND	ND	ND	ND	ND	ND	ND	ND	0.563153	0.997151	ND	ND	ND	ND	ND
Triglycerides__TG(18:2_30:1)	Triglycerides	TG(18:2_30:1)	0.323278	0.672635	-0.140855	0.990615	0.472051	0.94179	-2.04775	0.0353897	-2.39562	0.128844	-0.132761	0.938311	0.591089	0.274637	0.416153	0.85786	-0.10737	0.976527	0.607541	0.53991	0.275258	0.799457	-0.163776	0.997673	ND	ND	ND	ND	ND	ND	ND	ND	ND	ND	ND	ND	ND	ND	ND	ND	ND	ND	ND	ND	ND	ND	ND
Triglycerides__TG(18:2_32:0)	Triglycerides	TG(18:2_32:0)	0.228283	0.700103	0.125873	0.990615	0.362748	0.965729	-1.88431	0.0299716	-1.68343	0.135776	-0.185889	0.933799	0.584963	0.325672	0.524674	0.85786	0.0184823	0.998075	0.63272	0.485912	0.422139	0.605693	-0.213917	0.997673	ND	ND	ND	ND	-1.02046	0.50152	1.86451	0.148147	0.55903	0.633527	ND	ND	ND	ND	ND	ND	0.759146	0.997151	ND	ND	ND	ND	-0.297218
Triglycerides__TG(18:2_32:1)	Triglycerides	TG(18:2_32:1)	0.299059	0.671843	-0.0224494	0.990615	0.347998	0.965729	-2.19544	0.0299716	-2.27518	0.140333	-0.228184	0.918129	0.552253	0.266438	0.468421	0.85786	-0.120918	0.976527	0.645783	0.518585	0.370861	0.725678	-0.178959	0.997673	0.735576	0.746672	-0.185727	0.996956	-1.37504	0.50152	1.69468	0.370153	0.716348	0.57852	ND	ND	-1.3435	0.147897	-0.504885	0.725619	0.361926	0.997151	-0.904387	0.522326	0.525555	0.984689	-0.437405
Triglycerides__TG(18:2_32:2)	Triglycerides	TG(18:2_32:2)	0.318662	0.671843	0.0284231	0.990615	0.596468	0.94179	-1.98144	0.0299716	-1.97911	0.152728	-0.111744	0.955262	1.01768	0.0915274	0.384203	0.85786	0.00993498	0.998075	0.931374	0.458399	0.518224	0.616637	-0.121394	0.997673	0.639555	0.746672	0.0126225	0.996956	-1.00504	0.50152	1.83362	0.358274	0.846724	0.576423	-0.813765	0.527614	-0.878808	0.247067	-0.490458	0.725619	0.0914046	0.997151	-0.71814	0.522326	0.447894	0.984689	-0.393943
Triglycerides__TG(18:2_33:0)	Triglycerides	TG(18:2_33:0)	0.202847	0.727933	0.423844	0.881429	0.680817	0.94179	-1.65183	0.0323514	-1.05234	0.208777	0.146722	0.950143	1.03615	0.21719	0.490834	0.85786	0.267178	0.976527	0.961133	0.435068	0.889473	0.385725	0.0386217	0.997673	ND	ND	ND	ND	ND	ND	ND	ND	ND	ND	ND	ND	ND	ND	ND	ND	ND	ND	ND	ND	ND	ND	ND
Triglycerides__TG(18:2_33:1)	Triglycerides	TG(18:2_33:1)	0.379414	0.671843	0.150914	0.990615	0.701985	0.94179	-1.61118	0.0299716	-1.49473	0.160691	0.156635	0.938311	1.12812	0.105342	0.381793	0.85786	0.188193	0.976527	1.15604	0.424733	0.803882	0.45301	0.00647987	0.997673	0.707991	0.746672	-0.0566602	0.996956	-0.888655	0.579184	1.56867	0.370153	0.46891	0.691446	ND	ND	ND	ND	-1.16419	0.725619	ND	ND	-0.0967949	0.913176	0.382338	0.984689	-0.00849479
Triglycerides__TG(18:2_33:2)	Triglycerides	TG(18:2_33:2)	0.219283	0.745002	0.351076	0.920125	1.03062	0.94179	-1.78573	0.0299716	-1.1234	0.200579	0.413442	0.895328	1.37621	0.0915274	0.435426	0.85786	0.354926	0.976527	1.26726	0.424733	1.03388	0.366117	0.10424	0.997673	0.512263	0.746672	0.226945	0.996956	-0.558327	0.572238	2.12342	0.358274	0.942037	0.576423	ND	ND	-0.810564	0.247067	-0.716891	0.725619	0.487843	0.997151	ND	ND	0.24591	0.984689	-0.177787
Triglycerides__TG(18:2_34:0)	Triglycerides	TG(18:2_34:0)	0.238134	0.700103	0.281751	0.960768	0.334819	0.965729	-1.70429	0.0388133	-1.48724	0.128844	-0.252398	0.928971	0.663138	0.355724	0.378559	0.85786	0.0279003	0.996128	0.704372	0.479481	0.594248	0.490577	-0.158774	0.997673	0.611989	0.746672	0.359157	0.996956	-0.985019	0.50152	1.76328	0.358274	1.00919	0.576423	ND	ND	ND	ND	ND	ND	0.511194	0.997151	ND	ND	ND	ND	-0.30304
Triglycerides__TG(18:2_34:1)	Triglycerides	TG(18:2_34:1)	0.300177	0.671843	0.188353	0.990615	0.384911	0.965729	-1.78969	0.0321855	-1.66463	0.131623	-0.275968	0.918129	0.77079	0.24238	0.421895	0.85786	-0.0116561	0.998075	0.830116	0.458399	0.594848	0.490577	-0.143935	0.997673	0.730063	0.746672	0.324723	0.996956	-1.27212	0.50152	1.66777	0.358274	0.807343	0.576423	-0.798491	0.66816	-0.645079	0.405577	-0.805184	0.725619	-0.0493955	0.997151	-0.585941	0.646975	0.139314	0.984689	-0.532921
Triglycerides__TG(18:2_34:2)	Triglycerides	TG(18:2_34:2)	0.257946	0.687127	0.23226	0.985602	0.699621	0.94179	-1.81899	0.0299716	-1.49188	0.152728	-0.0158771	0.995062	1.08169	0.0954015	0.507091	0.85786	0.164293	0.976527	1.02018	0.427876	0.755306	0.402954	-0.0129478	0.997673	0.516026	0.746672	0.360537	0.996956	-1.13733	0.50152	1.7302	0.358274	0.980771	0.576423	-1.29376	0.521806	-0.703103	0.398353	-0.640049	0.725619	-0.0357968	0.997151	-0.802593	0.532473	0.202864	0.984689	-0.502323
Triglycerides__TG(18:2_34:3)	Triglycerides	TG(18:2_34:3)	0.369712	0.671843	0.0823211	0.990615	0.873813	0.94179	-1.92554	0.0299716	-1.5787	0.164327	0.164419	0.933799	1.10394	0.0485967	0.519039	0.85786	0.101458	0.976527	1.10611	0.434535	0.788435	0.447494	-0.062548	0.997673	0.585076	0.746672	-0.0377937	0.996956	-0.999018	0.50152	1.6037	0.358274	0.789698	0.57852	-0.765744	0.559176	-1.08258	0.163154	-0.770526	0.725619	0.00333677	0.997151	-0.685019	0.547403	-0.137576	0.984689	-0.351375
Triglycerides__TG(18:2_34:4)	Triglycerides	TG(18:2_34:4)	0.496047	0.671843	0.04591	0.990615	1.01361	0.94179	-1.72647	0.0299716	-1.33495	0.208777	0.570877	0.893472	1.17278	0.0485967	0.418337	0.85786	0.087607	0.978116	1.21973	0.424733	0.780741	0.482441	-0.158071	0.997673	0.31853	0.746672	0.239503	0.996956	-0.898808	0.50152	1.34215	0.358274	0.957428	0.576423	-0.50918	0.700063	-0.755949	0.247067	-0.373788	0.725619	-0.24205	0.997151	-0.882348	0.522326	-0.0510429	0.984689	-0.0986097
Triglycerides__TG(18:2_35:1)	Triglycerides	TG(18:2_35:1)	0.240291	0.700103	0.371921	0.919375	0.735933	0.94179	-1.51436	0.0353897	-1.0647	0.188918	0.0569309	0.974506	1.0741	0.17726	0.486283	0.85786	0.185422	0.976527	1.09959	0.424733	0.990588	0.366117	0.0757459	0.997673	ND	ND	ND	ND	ND	ND	ND	ND	ND	ND	ND	ND	ND	ND	ND	ND	ND	ND	ND	ND	ND	ND	-0.38475
Triglycerides__TG(18:2_35:2)	Triglycerides	TG(18:2_35:2)	0.242908	0.700103	0.398656	0.881429	0.82071	0.94179	-1.58292	0.0299716	-1.08828	0.200579	0.104062	0.973119	1.29796	0.0954015	0.426625	0.85786	0.200451	0.976527	1.26176	0.424733	1.04956	0.366117	0.0739043	0.997673	0.865699	0.746672	0.50797	0.996956	-0.592003	0.554678	2.09337	0.358274	0.864528	0.576423	ND	ND	-0.243043	0.707084	-0.619969	0.725619	0.251619	0.997151	0.0476664	0.94584	0.581193	0.984689	-0.34621
Triglycerides__TG(18:2_35:3)	Triglycerides	TG(18:2_35:3)	0.290389	0.687127	0.406491	0.920125	1.11596	0.94179	-1.3742	0.0299716	-0.67722	0.49671	0.539862	0.895328	1.43492	0.0518611	0.454931	0.85786	0.404581	0.976527	1.36123	0.424733	1.0266	0.366117	0.0810333	0.997673	0.750022	0.746672	0.323422	0.996956	-0.384755	0.572238	1.71316	0.358274	0.615777	0.590439	-0.611435	0.559176	-0.703357	0.398353	-0.468336	0.725619	0.169925	0.997151	-0.351372	0.715497	0.535107	0.984689	0.113458
Triglycerides__TG(18:2_36:0)	Triglycerides	TG(18:2_36:0)	0.294471	0.696321	0.510943	0.817167	0.202028	0.972143	-1.26648	0.0965762	-1.13364	0.160691	-0.317352	0.918129	0.898286	0.356262	0.284117	0.85786	0.0643875	0.990931	0.847997	0.458399	0.811462	0.390433	-0.0472111	0.997673	ND	ND	ND	ND	ND	ND	ND	ND	ND	ND	ND	ND	ND	ND	ND	ND	ND	ND	ND	ND	ND	ND	ND
Triglycerides__TG(18:2_36:1)	Triglycerides	TG(18:2_36:1)	0.287594	0.687127	0.433369	0.881429	0.281193	0.965729	-1.53436	0.0412797	-1.25832	0.152728	-0.327639	0.918129	0.935124	0.300313	0.369115	0.85786	0.0454135	0.990931	0.946598	0.444278	0.816498	0.387724	-0.0817344	0.997673	-0.0445834	0.964044	ND	ND	-0.689169	0.577732	1.32471	0.370153	1.31665	0.576423	-0.478654	0.730606	-1.14044	0.147897	-0.0123534	0.979763	0.896028	0.997151	-0.731425	0.534988	0.383055	0.984689	-0.274965
Triglycerides__TG(18:2_36:2)	Triglycerides	TG(18:2_36:2)	0.314768	0.671843	0.399455	0.881429	0.483146	0.952053	-1.5087	0.033333	-1.29778	0.154111	-0.267029	0.918129	1.08294	0.170399	0.389639	0.85786	0.050262	0.990931	1.13917	0.424733	0.926706	0.366117	-0.0165178	0.997673	0.497174	0.746672	0.115893	0.996956	-0.841509	0.503736	1.65623	0.358274	0.944962	0.576423	-1.03921	0.559176	-0.98358	0.247579	-0.344134	0.725619	0.538931	0.997151	-0.337272	0.776895	0.571995	0.984689	-0.248853
Triglycerides__TG(18:2_36:3)	Triglycerides	TG(18:2_36:3)	0.244149	0.700103	0.442495	0.881429	0.829194	0.94179	-1.57344	0.030799	-1.05821	0.214668	-0.0592786	0.979948	1.45782	0.0915274	0.430249	0.85786	0.214589	0.976527	1.37817	0.424733	1.0873	0.366117	0.0977395	0.997673	0.355772	0.746672	0.182355	0.996956	-0.665844	0.554678	1.39685	0.358274	0.852689	0.576423	-0.654221	0.60433	-0.735681	0.317724	-0.585176	0.725619	0.422516	0.997151	-0.340573	0.734582	0.460371	0.984689	-0.0968301
Triglycerides__TG(18:2_36:4)	Triglycerides	TG(18:2_36:4)	0.155148	0.80905	0.612894	0.781258	1.26486	0.94179	-1.54228	0.0463253	-0.694876	0.424369	0.344075	0.928971	1.62149	0.0485967	0.542835	0.85786	0.406007	0.976527	1.49632	0.424733	1.262	0.366117	0.0934059	0.997673	0.0990267	0.891328	0.229912	0.996956	-0.628753	0.546862	1.34092	0.376849	0.753589	0.576423	-0.857805	0.521806	-0.799742	0.336095	-0.580155	0.725619	0.235397	0.997151	-0.378076	0.715497	0.044756	0.984689	-0.148212
Triglycerides__TG(18:2_36:5)	Triglycerides	TG(18:2_36:5)	0.388335	0.687127	0.46016	0.881429	1.40848	0.94179	-1.45668	0.0547613	-0.486242	0.609603	0.674114	0.895328	1.61254	0.0485967	0.600011	0.85786	0.438562	0.976527	1.47617	0.424733	1.07949	0.366117	-0.0430555	0.997673	0.176098	0.81536	0.144781	0.996956	-0.443073	0.630491	1.47617	0.358274	0.70557	0.576423	-0.413809	0.739393	-0.814527	0.247067	-0.659805	0.725619	0.105416	0.997151	-1.05002	0.522326	-0.275131	0.984689	0.0297032
Triglycerides__TG(18:2_38:4)	Triglycerides	TG(18:2_38:4)	0.371181	0.672635	0.889473	0.665119	0.841694	0.94179	-0.849307	0.112868	-0.0970705	0.924028	0.317134	0.918129	1.38516	0.198229	0.463811	0.85786	0.575987	0.976527	1.23788	0.424733	0.878543	0.366117	-0.405566	0.997673	0.401662	0.746672	0.110726	0.996956	-0.868456	0.50152	1.33619	0.405183	0.926433	0.576423	-1.24967	0.521806	-0.80601	0.411432	-0.630011	0.725619	-0.113172	0.997151	-0.92091	0.534988	0.0922848	0.984689	-0.611314
Triglycerides__TG(18:2_38:5)	Triglycerides	TG(18:2_38:5)	0.476075	0.671843	0.96232	0.665119	1.02355	0.94179	-0.761729	0.184036	0.0823651	0.936323	0.660935	0.893472	1.29771	0.198229	0.545875	0.85786	0.433622	0.976527	1.19906	0.424733	0.963374	0.366117	-0.313482	0.997673	0.267129	0.810215	0.211184	0.996956	-0.927042	0.50152	1.25961	0.417176	0.831024	0.576423	-1.18756	0.521806	-0.792423	0.392045	-0.536164	0.725619	-0.575901	0.997151	-0.854985	0.534988	-0.00817183	0.989441	-0.48067
Triglycerides__TG(18:2_38:6)	Triglycerides	TG(18:2_38:6)	0.404287	0.671843	0.916154	0.634161	1.25906	0.94179	-0.814729	0.0887198	0.00490895	0.994272	0.803193	0.893472	1.43935	0.136483	0.433783	0.85786	0.54988	0.976527	1.25123	0.424733	0.946202	0.366117	-0.3106	0.997673	0.0381904	0.956565	0.144963	0.996956	-0.415269	0.58442	1.03171	0.467567	0.581726	0.57852	-0.627338	0.559176	-0.815741	0.391432	-0.633163	0.725619	-0.261675	0.997151	-1.12254	0.522326	-0.32536	0.984689	0.0698673
Triglycerides__TG(18:3_30:0)	Triglycerides	TG(18:3_30:0)	0.38821	0.671843	-0.182196	0.990615	0.459878	0.94179	-2	0.0299716	-1.64525	0.210822	0.198222	0.933799	0.584193	0.296235	0.328553	0.85786	-0.0510071	0.990931	0.572993	0.546677	0.19757	0.873679	-0.351823	0.997673	ND	ND	ND	ND	ND	ND	ND	ND	ND	ND	ND	ND	ND	ND	ND	ND	ND	ND	ND	ND	ND	ND	ND
Triglycerides__TG(18:3_32:0)	Triglycerides	TG(18:3_32:0)	0.352399	0.671843	-0.0773365	0.990615	0.594372	0.94179	-1.9334	0.0299716	-1.50637	0.169529	0.26789	0.918129	0.611236	0.266435	0.508385	0.85786	0.0666655	0.987879	0.748884	0.479481	0.377626	0.691403	-0.25875	0.997673	ND	ND	ND	ND	ND	ND	ND	ND	ND	ND	ND	ND	ND	ND	ND	ND	ND	ND	ND	ND	ND	ND	ND
Triglycerides__TG(18:3_32:1)	Triglycerides	TG(18:3_32:1)	0.384135	0.671843	-0.169612	0.990615	0.599468	0.94179	-2.18855	0.0299716	-2.04755	0.152728	0.268467	0.895328	0.520785	0.283032	0.413806	0.85786	-0.0449977	0.990931	0.712668	0.501577	0.332154	0.756303	-0.267585	0.997673	1.17139	0.746672	ND	ND	-1.21621	0.50152	1.79903	0.358274	1.03754	0.633945	ND	ND	ND	ND	-0.979766	0.725619	ND	ND	ND	ND	-0.0781535	0.984689	ND
Triglycerides__TG(18:3_33:2)	Triglycerides	TG(18:3_33:2)	0.247301	0.671843	ND	ND	0.81526	0.965729	ND	ND	ND	ND	0.310177	0.918129	1.18342	0.18028	ND	ND	0.212994	0.976527	1.3657	0.424733	ND	ND	0.0592972	0.997673	ND	ND	ND	ND	ND	ND	ND	ND	ND	ND	ND	ND	ND	ND	ND	ND	ND	ND	ND	ND	ND	ND	ND
Triglycerides__TG(18:3_34:0)	Triglycerides	TG(18:3_34:0)	0.367114	0.671843	0.0887247	0.990615	0.408523	0.965729	-1.83706	0.0299716	-1.55211	0.152728	0.047885	0.979948	0.811437	0.285288	0.349658	0.85786	-0.0451329	0.990931	0.958097	0.444278	0.465036	0.669615	-0.215131	0.997673	ND	ND	ND	ND	ND	ND	ND	ND	ND	ND	ND	ND	ND	ND	ND	ND	ND	ND	ND	ND	ND	ND	ND
Triglycerides__TG(18:3_34:1)	Triglycerides	TG(18:3_34:1)	0.419715	0.671843	0.0920868	0.990615	0.63295	0.94179	-1.84633	0.0299716	-1.54699	0.152728	0.135219	0.938311	0.885041	0.144099	0.404168	0.85786	0.0740667	0.986837	1.00252	0.435068	0.564661	0.515994	-0.191796	0.997673	0.645384	0.746672	0.456422	0.996956	-1.16579	0.50152	1.82049	0.358274	1.04979	0.576423	-1.20136	0.581791	-1.29362	0.280252	-0.722553	0.725619	-0.249041	0.997151	-0.655938	0.666765	0.104405	0.984689	-0.591875
Triglycerides__TG(18:3_34:2)	Triglycerides	TG(18:3_34:2)	0.496723	0.671843	0.00613063	0.993664	0.869999	0.94179	-1.8214	0.0299716	-1.34896	0.202438	0.328216	0.895328	1.03179	0.0915274	0.440587	0.85786	0.158728	0.976527	1.08385	0.424733	0.612915	0.514327	-0.176995	0.997673	0.623657	0.746672	0.236616	0.996956	-1.04093	0.503736	1.76743	0.358274	1.26778	0.564144	-1.03616	0.559176	-0.875122	0.280252	-0.592806	0.725619	-0.388778	0.997151	-1.01227	0.522326	-0.073774	0.984689	-0.502825
Triglycerides__TG(18:3_34:3)	Triglycerides	TG(18:3_34:3)	0.634472	0.635843	-0.131945	0.990615	1.07017	0.94179	-1.75476	0.0299716	-1.62739	0.177656	0.648597	0.885223	1.09569	0.0485967	0.357421	0.85786	0.162741	0.976527	1.24182	0.424733	0.652032	0.548028	-0.11493	0.997673	0.496775	0.746672	-0.180408	0.996956	-0.936535	0.503736	1.36292	0.358274	0.775866	0.576423	-0.46604	0.730606	-1.06495	0.163154	-0.691041	0.725619	-0.0264397	0.997151	-0.808806	0.522973	-0.109987	0.984689	-0.35717
Triglycerides__TG(18:3_35:2)	Triglycerides	TG(18:3_35:2)	0.382919	0.671843	0.199628	0.987317	1.12301	0.94179	-1.42234	0.0299716	-0.484192	0.655668	0.712068	0.893472	1.15159	0.104892	0.420585	0.85786	0.190727	0.976527	1.59495	0.366526	0.902052	0.385725	0.690222	0.997673	ND	ND	ND	ND	ND	ND	ND	ND	ND	ND	ND	ND	ND	ND	ND	ND	ND	ND	ND	ND	ND	ND	ND
Triglycerides__TG(18:3_36:1)	Triglycerides	TG(18:3_36:1)	0.430196	0.671843	0.328757	0.936974	0.561813	0.94179	-1.56019	0.0440412	-1.04231	0.193871	0.0801593	0.973119	1.05873	0.232405	0.401622	0.85786	0.133098	0.976527	1.03095	0.434535	0.838284	0.385725	-0.0991256	0.997673	-0.0609532	0.956565	-0.178738	0.996956	-0.87138	0.50152	1.55935	0.358274	0.743348	0.576423	ND	ND	-0.946467	0.247067	-0.501329	0.725619	0.189549	0.997151	-0.633092	0.628743	0.366794	0.984689	-0.297777
Triglycerides__TG(18:3_36:2)	Triglycerides	TG(18:3_36:2)	0.524989	0.671843	0.271208	0.960768	0.723741	0.94179	-1.4906	0.033333	-1.15055	0.177656	0.0901725	0.973119	1.23002	0.107298	0.374644	0.85786	0.0786706	0.987879	1.33436	0.424733	0.881309	0.366117	-0.0963651	0.997673	0.512346	0.746672	-0.13072	0.996956	-0.624622	0.630491	1.54386	0.358274	0.85622	0.576423	-0.761251	0.66816	-1.06985	0.247067	-0.524939	0.725619	0.260508	0.997151	-0.781458	0.56576	0.195228	0.984689	-0.232333
Triglycerides__TG(18:3_36:3)	Triglycerides	TG(18:3_36:3)	0.411388	0.671843	0.362702	0.930174	1.06662	0.94179	-1.607	0.0299716	-0.895871	0.312566	0.402236	0.895328	1.43834	0.0516221	0.354336	0.85786	0.257075	0.976527	1.43119	0.424733	1.01718	0.366117	-0.0414229	0.997673	0.282497	0.784509	0.0798091	0.996956	-0.61718	0.573784	1.6697	0.358274	0.83823	0.576423	-0.657658	0.585422	-1.06544	0.247067	-0.643547	0.725619	0.0608917	0.997151	-0.651391	0.56576	0.0850444	0.984689	-0.190368
Triglycerides__TG(18:3_36:4)	Triglycerides	TG(18:3_36:4)	0.435388	0.671843	0.302716	0.960768	1.3335	0.94179	-1.32984	0.0459787	-0.563511	0.534182	0.761481	0.893472	1.62402	0.0485967	0.440988	0.85786	0.380213	0.976527	1.54254	0.424733	1.03032	0.366117	-0.00832326	0.997673	0.134141	0.850776	-0.112889	0.996956	-0.656444	0.554678	1.38159	0.358274	0.708534	0.576423	-0.708144	0.636914	-0.987439	0.247067	-0.738426	0.725619	-0.258886	0.997151	-0.884038	0.522326	-0.334847	0.984689	-0.0990512
Triglycerides__TG(18:3_38:5)	Triglycerides	TG(18:3_38:5)	0.568317	0.62417	0.527629	0.919375	0.866316	0.94179	-0.562267	0.0953983	0.493102	0.469596	0.63018	0.895328	0.966998	0.21719	0.358922	0.85786	0.12234	0.987879	1.2758	0.366526	0.540568	0.588087	-0.33393	0.997673	0.211232	0.810215	-0.135515	0.996956	-0.918489	0.50152	1.17811	0.358274	0.463947	0.576423	-1.12245	0.521806	-0.724713	0.334486	-0.427696	0.725619	-0.708162	0.997151	-0.615209	0.522326	-0.287518	0.984689	-0.533522
Triglycerides__TG(18:3_38:6)	Triglycerides	TG(18:3_38:6)	0.5476	0.671843	0.359542	0.942922	1.0494	0.94179	-0.256665	0.716156	-0.171141	0.884811	0.996754	0.893472	1.29009	0.218458	0.430509	0.85786	0.36473	0.976527	1.13982	0.424733	0.0831101	0.945891	-0.39252	0.997673	0.157687	0.850776	0.618943	0.996956	-0.400651	0.572238	1.15295	0.40164	0.942342	0.520619	-0.515921	0.581791	-0.748968	0.380049	-0.207865	0.869353	-0.708951	0.997151	-1.04499	0.522326	-0.0199192	0.987752	0.215912
Triglycerides__TG(20:0_32:3)	Triglycerides	TG(20:0_32:3)	0.035341	0.947824	0.342556	0.920125	0.560761	0.94179	-1.48075	0.113884	-1.24263	0.160974	-0.114949	0.958479	0.673562	0.320126	0.555782	0.85786	0.00857809	0.998075	1.06348	0.424733	0.623515	0.489845	-0.117403	0.997673	ND	ND	ND	ND	ND	ND	ND	ND	ND	ND	ND	ND	ND	ND	ND	ND	ND	ND	ND	ND	ND	ND	ND
Triglycerides__TG(20:0_32:4)	Triglycerides	TG(20:0_32:4)	0.250268	0.693085	0.285955	0.961098	0.714874	0.94179	-1.33808	0.0412797	-1.08472	0.204182	-0.054532	0.979948	1.20209	0.138441	0.427662	0.85786	0.148458	0.976527	1.47538	0.368018	0.762264	0.402954	0.297856	0.997673	ND	ND	ND	ND	ND	ND	ND	ND	ND	ND	ND	ND	ND	ND	ND	ND	ND	ND	ND	ND	ND	ND	ND
Triglycerides__TG(20:0_34:1)	Triglycerides	TG(20:0_34:1)	0.371721	0.821183	0.229687	0.990615	0.159306	0.984885	ND	ND	0.430106	0.893474	-0.465042	0.928971	-0.529073	0.644634	ND	ND	-0.668886	0.976527	0.384127	0.75594	0.943904	0.515994	0.256364	0.997673	ND	ND	ND	ND	ND	ND	ND	ND	ND	ND	ND	ND	ND	ND	ND	ND	ND	ND	ND	ND	-0.927068	0.984689	ND
Triglycerides__TG(20:1_30:1)	Triglycerides	TG(20:1_30:1)	-0.536501	0.581307	0.542967	0.817167	0.2837	0.965729	ND	ND	ND	ND	-0.224779	0.930245	-0.0957004	0.84378	0.621763	0.85786	-0.304472	0.976527	0.183468	0.830254	0.171708	0.885379	0.00454597	0.997673	ND	ND	ND	ND	ND	ND	ND	ND	ND	ND	ND	ND	ND	ND	ND	ND	ND	ND	ND	ND	ND	ND	ND
Triglycerides__TG(20:1_32:1)	Triglycerides	TG(20:1_32:1)	0.165893	0.75605	0.114407	0.990615	0.137419	0.980376	-1.83042	0.038608	-1.65923	0.160974	-0.269429	0.928971	0.477447	0.397815	0.55673	0.85786	-0.220793	0.976527	0.572832	0.611461	0.514573	0.616637	-0.111521	0.997673	ND	ND	ND	ND	ND	ND	ND	ND	ND	ND	ND	ND	ND	ND	ND	ND	ND	ND	ND	ND	ND	ND	ND
Triglycerides__TG(20:1_32:2)	Triglycerides	TG(20:1_32:2)	0.0995824	0.835847	0.272127	0.969012	0.480419	0.94179	-1.44898	0.0588547	-1.31036	0.200579	-0.27197	0.918129	0.722232	0.296235	0.589958	0.85786	-0.0626586	0.990931	0.932381	0.435323	0.665283	0.455159	-0.103715	0.997673	ND	ND	ND	ND	ND	ND	ND	ND	ND	ND	ND	ND	ND	ND	ND	ND	ND	ND	ND	ND	ND	ND	ND
Triglycerides__TG(20:1_32:3)	Triglycerides	TG(20:1_32:3)	0.171112	0.724714	0.373529	0.939998	0.4153	0.965729	-1.61534	0.0473118	-1.27521	0.310696	-0.203947	0.933799	0.905465	0.20666	0.401844	0.85786	-0.28869	0.976527	1.26192	0.424733	0.741001	0.482441	0.108266	0.997673	ND	ND	ND	ND	ND	ND	ND	ND	ND	ND	ND	ND	ND	ND	ND	ND	ND	ND	ND	ND	ND	ND	ND
Triglycerides__TG(20:1_34:0)	Triglycerides	TG(20:1_34:0)	-0.0742697	0.87527	0.769458	0.491395	0.286023	0.965729	-0.980703	0.202425	-0.943016	0.167396	-0.429316	0.895328	0.372285	0.593411	0.547195	0.85786	-0.103536	0.985009	0.763308	0.424733	0.644492	0.402954	0.293345	0.997673	ND	ND	ND	ND	ND	ND	ND	ND	ND	ND	ND	ND	ND	ND	ND	ND	ND	ND	ND	ND	ND	ND	ND
Triglycerides__TG(20:1_34:1)	Triglycerides	TG(20:1_34:1)	0.186596	0.763085	0.230759	0.985602	0.232265	0.965729	-1.44559	0.0865157	-1.57206	0.122674	-0.390633	0.895328	0.489732	0.449623	0.485648	0.85786	-0.0496404	0.990931	0.597065	0.560376	0.588202	0.390433	-0.0720757	0.997673	ND	ND	ND	ND	ND	ND	1.51332	0.335135	ND	ND	ND	ND	ND	ND	ND	ND	0.0196288	0.997151	ND	ND	ND	ND	-0.393965
Triglycerides__TG(20:1_34:2)	Triglycerides	TG(20:1_34:2)	0.0959902	0.861571	0.439354	0.881429	0.332511	0.965729	-1.63603	0.0358203	-1.37135	0.152728	-0.310028	0.918129	0.890906	0.266435	0.56571	0.85786	0.00374402	0.998075	0.829745	0.479481	0.860181	0.385725	-0.0253387	0.997673	0.573861	0.746672	0.292076	0.996956	-1.10015	0.50152	1.49998	0.427715	0.705508	0.576423	ND	ND	-1.11506	0.147897	-0.482601	0.725619	0.0486229	0.997151	ND	ND	-0.16331	0.984689	-0.494341
Triglycerides__TG(20:1_34:3)	Triglycerides	TG(20:1_34:3)	-0.0319337	0.947824	0.264626	0.985602	0.782446	0.94179	-1.68004	0.0353897	-1.44597	0.160691	0.118333	0.955262	0.713256	0.183641	0.713742	0.85786	0.11982	0.976527	0.715922	0.479481	0.852049	0.385725	0.202874	0.997673	0.320199	0.746672	ND	ND	-0.860764	0.50152	0.934274	0.370153	0.560715	0.691446	ND	ND	ND	ND	ND	ND	ND	ND	ND	ND	ND	ND	ND
Triglycerides__TG(20:2_32:0)	Triglycerides	TG(20:2_32:0)	0.271512	0.687127	0.271605	0.960768	0.450846	0.94179	-1.26875	0.0495621	-0.960023	0.204538	0.0122847	0.995062	0.684658	0.344859	0.43076	0.85786	0.0497402	0.990931	0.749542	0.424733	0.429711	0.606962	-0.251299	0.997673	ND	ND	ND	ND	ND	ND	ND	ND	ND	ND	ND	ND	ND	ND	ND	ND	ND	ND	ND	ND	ND	ND	ND
Triglycerides__TG(20:2_32:1)	Triglycerides	TG(20:2_32:1)	0.342802	0.671843	0.274651	0.985602	0.690925	0.94179	-1.4792	0.0808414	-1.38071	0.169529	0.28048	0.895328	0.512493	0.355724	0.592531	0.85786	0.082645	0.985009	0.412957	0.60499	0.405917	0.67394	-0.0663068	0.997673	ND	ND	ND	ND	ND	ND	1.33103	0.358274	0.465002	0.720442	ND	ND	ND	ND	ND	ND	ND	ND	ND	ND	ND	ND	ND
Triglycerides__TG(20:2_34:1)	Triglycerides	TG(20:2_34:1)	0.358303	0.671843	0.599335	0.843072	0.532708	0.94179	-1.25798	0.0794571	-1.10559	0.167396	0.064224	0.973119	0.686095	0.342687	0.626154	0.85786	0.144339	0.976527	0.553817	0.526039	0.685222	0.434119	-0.171878	0.997673	ND	ND	ND	ND	ND	ND	1.72784	0.358274	0.210097	0.87321	ND	ND	ND	ND	ND	ND	ND	ND	ND	ND	ND	ND	ND
Triglycerides__TG(20:2_34:2)	Triglycerides	TG(20:2_34:2)	0.374168	0.671843	0.582641	0.817167	0.682914	0.94179	-1.31152	0.0392901	-0.888036	0.225578	0.0996065	0.973119	1.01452	0.231604	0.577574	0.85786	0.344502	0.976527	0.775528	0.458399	0.737738	0.385725	-0.138365	0.997673	0.504061	0.746672	-0.0809688	0.996956	-1.18389	0.50152	2.10626	0.359856	1.02068	0.576423	-1.78749	0.521806	-1.0238	0.310776	-0.433785	0.733695	-0.263479	0.997151	-0.470166	0.629834	-0.725581	0.984689	-1.11486
Triglycerides__TG(20:2_34:3)	Triglycerides	TG(20:2_34:3)	0.578758	0.671843	0.431812	0.920125	0.866638	0.94179	-1.40985	0.0424647	-0.867007	0.316241	0.266569	0.918129	1.17285	0.0902841	0.369434	0.85786	0.311423	0.976527	1.34599	0.368018	0.663291	0.490577	-0.0625602	0.997673	ND	ND	ND	ND	ND	ND	ND	ND	ND	ND	ND	ND	ND	ND	ND	ND	ND	ND	ND	ND	ND	ND	ND
Triglycerides__TG(20:2_34:4)	Triglycerides	TG(20:2_34:4)	0.11382	0.862504	0.0621217	0.990615	1.23724	0.94179	-1.06468	0.0612693	-0.915936	0.307059	0.667924	0.895328	0.763634	0.342687	-0.14401	0.878548	0.153351	0.976527	1.30296	0.366526	0.183963	0.86028	-0.0708107	0.997673	ND	ND	ND	ND	ND	ND	ND	ND	ND	ND	ND	ND	ND	ND	ND	ND	ND	ND	ND	ND	ND	ND	ND
Triglycerides__TG(20:2_36:5)	Triglycerides	TG(20:2_36:5)	0.497214	0.671843	0.226234	0.960768	1.0393	0.94179	-0.736966	0.0526005	-0.0455969	0.952169	0.683445	0.893472	1.37036	0.0954015	0.366128	0.85786	0.682104	0.976527	1.46488	0.424733	0.774184	0.514327	-0.243359	0.997673	ND	ND	ND	ND	ND	ND	1.52698	0.369567	-0.239827	0.815975	ND	ND	ND	ND	ND	ND	ND	ND	ND	ND	-0.7176	0.984689	-0.655665
Triglycerides__TG(20:3_32:0)	Triglycerides	TG(20:3_32:0)	0.22244	0.700103	0.269708	0.97567	0.541498	0.94179	-1.36764	0.033333	-0.91696	0.201592	0.627334	0.895328	0.428702	0.450645	0.38305	0.85786	0.138656	0.976527	0.433854	0.56183	0.324453	0.725678	-0.158634	0.997673	ND	ND	ND	ND	ND	ND	ND	ND	ND	ND	ND	ND	ND	ND	ND	ND	ND	ND	ND	ND	ND	ND	ND
Triglycerides__TG(20:3_32:1)	Triglycerides	TG(20:3_32:1)	0.310704	0.671843	0.166342	0.990615	0.491354	0.94179	-1.4795	0.051335	-0.995077	0.312566	0.472938	0.895328	0.551531	0.322372	0.388402	0.85786	-0.217515	0.976527	0.542466	0.521742	0.286723	0.781739	-0.308678	0.997673	ND	ND	ND	ND	ND	ND	ND	ND	ND	ND	ND	ND	ND	ND	ND	ND	ND	ND	ND	ND	ND	ND	ND
Triglycerides__TG(20:3_32:2)	Triglycerides	TG(20:3_32:2)	0.308185	0.680498	0.108208	0.990615	0.874744	0.94179	-1.02422	0.0794571	-0.794167	0.47296	0.722741	0.885223	0.627744	0.296235	-0.00825579	0.996999	0.259118	0.976527	0.77096	0.424733	0.332672	0.743646	-0.208957	0.997673	ND	ND	ND	ND	ND	ND	ND	ND	ND	ND	ND	ND	ND	ND	ND	ND	ND	ND	ND	ND	ND	ND	ND
Triglycerides__TG(20:3_34:0)	Triglycerides	TG(20:3_34:0)	0.265526	0.692099	0.18661	0.990615	0.0992485	0.985243	-0.896191	0.0412797	-1.08688	0.160691	0.137504	0.973119	0.809353	0.342687	-0.341284	0.85786	0.00430014	0.998075	1.14226	0.424733	-0.0576588	0.97389	-0.0358162	0.997673	ND	ND	ND	ND	ND	ND	ND	ND	ND	ND	ND	ND	ND	ND	ND	ND	ND	ND	ND	ND	ND	ND	ND
Triglycerides__TG(20:3_34:1)	Triglycerides	TG(20:3_34:1)	0.355179	0.671843	0.38552	0.930174	0.556912	0.94179	-1.06308	0.152649	-0.862948	0.275401	0.428601	0.895328	0.596744	0.366539	0.375912	0.85786	0.0795318	0.990931	0.608835	0.479481	0.410489	0.649885	-0.25926	0.997673	0.863019	0.746672	-0.308296	0.996956	-0.997081	0.50152	2.13121	0.358274	0.685472	0.646463	-1.43366	0.521806	-0.843821	0.421052	-1.00183	0.725619	-0.625855	0.997151	-0.355617	0.750941	-0.784931	0.984689	-1.13016
Triglycerides__TG(20:3_34:2)	Triglycerides	TG(20:3_34:2)	0.263381	0.700103	0.590596	0.817167	0.767563	0.94179	-1.2521	0.0597483	-0.486101	0.58271	0.509946	0.895328	0.756785	0.296235	0.43807	0.85786	0.256964	0.976527	0.616219	0.479481	0.66069	0.390433	-0.250278	0.997673	0.994321	0.746672	-0.118604	0.996956	-1.51476	0.50152	2.15551	0.358274	0.879283	0.576423	ND	ND	-1.03248	0.426886	-1.23988	0.725619	-0.469077	0.997151	-0.763018	0.669757	-0.163838	0.984689	-0.644105
Triglycerides__TG(20:3_34:3)	Triglycerides	TG(20:3_34:3)	0.346108	0.671843	0.212579	0.990615	0.976597	0.94179	-1.13803	0.102681	-0.501936	0.609603	0.699552	0.893472	0.875881	0.170399	0.403007	0.85786	0.132248	0.976527	0.848594	0.435323	0.547553	0.605693	-0.170778	0.997673	0.365396	0.750764	0.236803	0.996956	-0.96873	0.54811	1.37953	0.394067	0.756977	0.558103	ND	ND	ND	ND	ND	ND	-0.338841	0.997151	ND	ND	0.241208	0.984689	-0.468337
Triglycerides__TG(20:3_36:3)	Triglycerides	TG(20:3_36:3)	0.460368	0.671843	0.749334	0.781258	0.722396	0.94179	-0.816765	0.100228	-0.206333	0.856921	0.372538	0.905426	1.12317	0.214809	0.516566	0.85786	0.268004	0.976527	1.20981	0.424733	0.830584	0.385725	-0.259988	0.997673	0.855762	0.746672	0.0279756	0.996956	-0.858675	0.50152	2.11744	0.358274	0.909444	0.576423	-0.752646	0.521806	-0.753498	0.405577	-0.636309	0.725619	-0.508816	0.997151	-0.115354	0.931483	0.443607	0.984689	-0.998079
Triglycerides__TG(20:3_36:4)	Triglycerides	TG(20:3_36:4)	0.315538	0.672635	0.885116	0.697869	0.892026	0.94179	-0.793661	0.139836	0.188409	0.856921	0.622608	0.895328	1.37005	0.183115	0.443967	0.85786	0.458892	0.976527	1.32548	0.424733	0.935343	0.366117	-0.195655	0.997673	0.410409	0.746672	0.0345123	0.996956	-0.151252	0.882825	1.38843	0.405183	0.799524	0.576423	-0.45038	0.674835	-0.478302	0.461571	-0.780322	0.725619	0.146078	0.997151	-0.390323	0.653671	-0.152847	0.984689	0.185235
Triglycerides__TG(20:3_36:5)	Triglycerides	TG(20:3_36:5)	0.382952	0.672635	0.604784	0.881429	0.660627	0.965729	ND	ND	0.220354	0.734582	0.423443	0.895328	0.723836	0.341557	0.00711039	0.995592	0.30648	0.976527	1.00502	0.424733	0.402869	0.574695	-0.506062	0.997673	0.148757	0.854838	-0.0552824	0.996956	-0.542318	0.50152	1.21775	0.358274	0.32247	0.691446	ND	ND	ND	ND	ND	ND	ND	ND	ND	ND	ND	ND	-0.37707
Triglycerides__TG(20:4_30:0)	Triglycerides	TG(20:4_30:0)	0.404723	0.671843	0.25029	0.987317	0.860137	0.94179	-1.34187	0.0622043	-0.939171	0.208777	0.99837	0.885223	0.662091	0.355724	0.401649	0.85786	0.0428131	0.990931	0.232122	0.733016	0.308683	0.755253	-0.383801	0.997673	ND	ND	ND	ND	ND	ND	ND	ND	ND	ND	ND	ND	ND	ND	ND	ND	ND	ND	ND	ND	ND	ND	ND
Triglycerides__TG(20:4_32:0)	Triglycerides	TG(20:4_32:0)	0.39135	0.671843	0.422949	0.936974	0.88111	0.94179	-1.44348	0.0526005	-0.794199	0.263279	0.976644	0.885223	0.546246	0.369177	0.518438	0.85786	0.179933	0.976527	0.371644	0.60499	0.488961	0.588087	-0.464776	0.997673	0.627208	0.746672	ND	ND	-1.26446	0.50152	1.47837	0.358274	0.151027	0.87321	ND	ND	ND	ND	-0.722466	0.725619	-0.656782	0.997151	ND	ND	ND	ND	-0.662203
Triglycerides__TG(20:4_32:1)	Triglycerides	TG(20:4_32:1)	0.434832	0.671843	0.100053	0.990615	0.859585	0.94179	-1.68692	0.040941	-1.43809	0.167396	0.987104	0.885223	0.408818	0.414638	0.327881	0.85786	-0.07493	0.988049	0.367156	0.647169	0.29483	0.799457	-0.398549	0.997673	0.649324	0.746672	-0.0814705	0.996956	-1.5086	0.50152	1.32518	0.370153	0.442524	0.695604	ND	ND	ND	ND	-0.711888	0.725619	-1.06461	0.997151	ND	ND	-0.198571	0.984689	-0.951933
Triglycerides__TG(20:4_32:2)	Triglycerides	TG(20:4_32:2)	0.370405	0.671843	0.31232	0.972936	0.947	0.94179	-1.34147	0.0384233	-0.763844	0.393731	0.836341	0.888781	0.876639	0.241046	0.346952	0.85786	0.163385	0.976527	0.622062	0.503061	0.375466	0.725678	-0.343463	0.997673	0.0622523	0.944457	-0.00766837	0.996956	-1.44136	0.50152	1.45736	0.370153	0.522201	0.633527	-1.03042	0.521806	-0.937023	0.418399	-0.57414	0.725619	-0.806853	0.997151	-1.00379	0.532473	-0.12332	0.984689	-0.51773
Triglycerides__TG(20:4_33:2)	Triglycerides	TG(20:4_33:2)	0.313038	0.688915	0.709459	0.800853	1.71739	0.94179	-0.303986	0.666542	0.0621055	0.955753	1.15885	0.885223	0.840867	0.274637	0.728479	0.85786	0.65808	0.976527	0.531348	0.517469	0.797774	0.390433	-0.0496514	0.997673	-0.19277	0.850776	0.402304	0.996956	-1.02066	0.50152	1.11916	0.451736	0.574274	0.594527	ND	ND	-0.589328	0.411432	-0.593864	0.725619	-0.463711	0.997151	ND	ND	-0.56357	0.984689	-0.547172
Triglycerides__TG(20:4_34:0)	Triglycerides	TG(20:4_34:0)	0.295798	0.685141	0.594006	0.83026	0.597975	0.94179	-0.986325	0.122936	-0.448081	0.563769	0.586338	0.895328	0.542961	0.4036	0.368213	0.85786	-0.051474	0.990931	0.473487	0.533592	0.57375	0.594577	-0.438621	0.997673	0.399533	0.746672	0.169097	0.996956	-1.24929	0.50152	1.21155	0.431639	0.601789	0.589921	-1.24403	0.527614	-0.794478	0.411432	-0.610232	0.725619	-0.569541	0.997151	-0.474853	0.715497	-0.241932	0.984689	-0.428998
Triglycerides__TG(20:4_34:1)	Triglycerides	TG(20:4_34:1)	0.296903	0.681677	0.529683	0.881429	0.738619	0.94179	-1.34388	0.0584878	-0.704275	0.360085	0.603997	0.895328	0.618299	0.355724	0.418471	0.85786	-0.030142	0.99795	0.533012	0.517469	0.574998	0.574695	-0.395573	0.997673	0.41396	0.749918	0.274348	0.996956	-1.2161	0.50152	1.23493	0.429266	0.756146	0.576423	-1.45096	0.521806	-0.856732	0.461571	-0.535662	0.725619	-0.798234	0.997151	-1.23987	0.534988	-0.228996	0.984689	-0.724884
Triglycerides__TG(20:4_34:2)	Triglycerides	TG(20:4_34:2)	0.415226	0.671843	0.510407	0.881429	0.909842	0.94179	-1.20278	0.0584878	-0.603406	0.448184	0.70097	0.893472	0.963207	0.223629	0.464549	0.85786	0.141973	0.976527	0.811891	0.435323	0.542394	0.515994	-0.494317	0.997673	0.144104	0.891328	0.35735	0.996956	-0.925024	0.50152	1.17931	0.451736	0.800244	0.576423	-1.22646	0.521806	-0.890926	0.422593	-0.488603	0.725619	-0.597884	0.997151	-1.33131	0.522326	-0.338575	0.984689	-0.432217
Triglycerides__TG(20:4_34:3)	Triglycerides	TG(20:4_34:3)	0.516333	0.671843	0.323595	0.960768	1.0767	0.94179	-1.39998	0.0299716	-0.871623	0.332495	0.922396	0.885223	0.97947	0.125899	0.33748	0.85786	0.0712645	0.987879	0.908286	0.435323	0.525808	0.605693	-0.402513	0.997673	0.172949	0.854838	-0.227502	0.996956	-1.01166	0.50152	0.796516	0.467567	0.293393	0.785615	-1.13271	0.521806	-1.22403	0.280252	-0.756691	0.725619	-0.892488	0.997151	-1.20266	0.522326	-0.722621	0.984689	-0.339686
Triglycerides__TG(20:4_35:3)	Triglycerides	TG(20:4_35:3)	0.137504	0.724714	ND	ND	1.13206	0.94179	ND	ND	ND	ND	0.651669	0.893472	0.794936	0.355724	ND	ND	0.117201	0.976527	1.24413	0.396998	ND	ND	ND	ND	ND	ND	ND	ND	ND	ND	ND	ND	ND	ND	ND	ND	ND	ND	ND	ND	ND	ND	ND	ND	ND	ND	ND
Triglycerides__TG(20:4_36:2)	Triglycerides	TG(20:4_36:2)	0.380019	0.671843	0.683846	0.788168	0.708777	0.94179	-0.946236	0.112868	-0.380723	0.633843	0.403093	0.895328	0.961432	0.296235	0.32258	0.85786	0.111861	0.987879	0.878489	0.435323	0.743081	0.45301	-0.422076	0.997673	0.162199	0.87464	0.172341	0.996956	-0.876997	0.50152	1.12601	0.405183	0.570424	0.633527	-1.13858	0.521806	-0.918507	0.380049	-0.674313	0.725619	-0.612555	0.997151	-1.02566	0.532473	0.032132	0.984689	-0.435614
Triglycerides__TG(20:4_36:3)	Triglycerides	TG(20:4_36:3)	0.358867	0.671843	0.840722	0.712493	1.0225	0.94179	-0.934624	0.0965762	-0.217984	0.848984	0.628486	0.893472	1.1838	0.187833	0.412237	0.85786	0.235785	0.976527	1.08538	0.424733	0.851336	0.385725	-0.349537	0.997673	0.0215622	0.974889	0.319662	0.996956	-0.610935	0.554678	1.00071	0.451736	0.737002	0.576423	-0.692798	0.562869	-0.874232	0.380049	-0.511381	0.725619	-0.394459	0.997151	-1.14675	0.522326	0.0805791	0.984689	-0.0269338
Triglycerides__TG(20:4_36:4)	Triglycerides	TG(20:4_36:4)	0.37627	0.687127	0.733485	0.776034	1.21	0.94179	-0.930322	0.0626242	-0.176504	0.856921	0.869609	0.893472	1.4488	0.136483	0.298874	0.85786	0.460752	0.976527	1.20902	0.424733	0.785363	0.390433	-0.385509	0.997673	-0.0876685	0.925973	0.307808	0.996956	-0.38257	0.630491	0.963634	0.467567	0.674498	0.576423	-0.540856	0.60433	-0.87292	0.380049	-0.459001	0.725619	-0.393537	0.997151	-1.10526	0.522326	-0.163988	0.984689	0.0878103
Triglycerides__TG(20:4_36:5)	Triglycerides	TG(20:4_36:5)	0.517187	0.671843	0.83672	0.776034	1.59166	0.94179	-0.658977	0.243017	0.0989891	0.923679	1.46234	0.885223	1.26597	0.0655923	0.436144	0.85786	0.60809	0.976527	0.941151	0.424733	0.713829	0.406273	-0.242086	0.997673	-0.275826	0.746672	0.140687	0.996956	-0.614813	0.503736	0.926076	0.467567	0.625846	0.576423	-0.853469	0.521806	-1.08716	0.303698	-0.579646	0.725619	-0.803764	0.997151	-1.41002	0.522326	-0.591507	0.984689	-0.456277
Triglycerides__TG(20:5_34:0)	Triglycerides	TG(20:5_34:0)	0.177884	0.745149	0.253661	0.961098	0.721121	0.94179	-0.918041	0.146332	-0.119909	0.856921	0.566936	0.893472	0.461427	0.57396	0.273324	0.85786	0.456187	0.976527	0.641831	0.424733	0.372371	0.755253	-0.207254	0.997673	ND	ND	ND	ND	ND	ND	ND	ND	ND	ND	ND	ND	ND	ND	ND	ND	ND	ND	ND	ND	ND	ND	ND
Triglycerides__TG(20:5_34:1)	Triglycerides	TG(20:5_34:1)	0.448267	0.671843	0.446057	0.881429	0.807082	0.94179	-0.902399	0.209777	-0.0881463	0.924028	0.748796	0.893472	0.412663	0.471009	0.373863	0.85786	-0.00430014	0.998075	0.92679	0.424733	0.48533	0.534826	-0.194282	0.997673	0.554517	0.746672	0.00363809	0.996956	-0.997553	0.50152	1.43449	0.415672	0.713579	0.57852	-0.890063	0.527614	-0.785351	0.380049	-0.798658	0.725619	-0.493227	0.997151	-1.03895	0.522326	-0.155522	0.984689	-0.535405
Triglycerides__TG(20:5_34:2)	Triglycerides	TG(20:5_34:2)	0.390892	0.671843	0.24102	0.990615	0.740145	0.94179	-1.08118	0.118297	-0.16969	0.893474	0.685018	0.893472	0.533702	0.366539	0.195561	0.86754	-0.00386703	0.998075	0.90177	0.424733	0.285213	0.807549	-0.176949	0.997673	0.42796	0.746672	0.204176	0.996956	-1.00981	0.50152	1.51128	0.39263	0.972948	0.576423	-0.957195	0.521806	-0.914027	0.337813	-0.538757	0.725619	-0.560724	0.997151	-1.23977	0.522326	-0.0852268	0.984689	-0.411782
Triglycerides__TG(20:5_36:2)	Triglycerides	TG(20:5_36:2)	0.567317	0.427202	0.733712	0.750377	0.508704	0.94179	-0.908796	0.102681	0.149535	0.856921	0.431261	0.895328	0.804055	0.356262	0.464382	0.85786	-0.179427	0.976527	1.00184	0.424733	0.841275	0.45301	-0.449834	0.997673	0.157297	0.855966	0.263034	0.996956	-0.469237	0.58442	1.00549	0.405183	0.568734	0.622058	-0.468122	0.636914	-0.656236	0.405663	-0.427354	0.733901	-0.269497	0.997151	ND	ND	0.0699282	0.984689	-0.0458557
Triglycerides__TG(20:5_36:3)	Triglycerides	TG(20:5_36:3)	0.374357	0.671843	0.485427	0.881429	1.00633	0.94179	-0.727447	0.177942	0.0423409	0.957412	0.78409	0.893472	0.735887	0.296235	0.148353	0.85786	0.230421	0.976527	1.25241	0.397063	0.599129	0.588087	0.407032	0.997673	0.341614	0.746672	0.075519	0.996956	-0.365668	0.64699	1.2217	0.370153	0.82606	0.576423	-0.172659	0.874286	-0.954425	0.247067	-0.697128	0.725619	-0.357199	0.997151	-1.09419	0.522326	0.0435864	0.984689	0.21354
Triglycerides__TG(22:0_32:4)	Triglycerides	TG(22:0_32:4)	0.396723	0.635843	-0.0666116	0.990615	ND	ND	ND	ND	ND	ND	ND	ND	0.939175	0.278885	0.000879424	0.998553	ND	ND	1.1477	0.424733	0.433741	0.588087	ND	ND	ND	ND	ND	ND	ND	ND	ND	ND	ND	ND	ND	ND	ND	ND	ND	ND	ND	ND	ND	ND	ND	ND	ND
Triglycerides__TG(22:1_32:5)	Triglycerides	TG(22:1_32:5)	0.145956	0.789986	0.502954	0.881429	1.12057	0.94179	-0.658097	0.326622	-0.318076	0.697153	0.349305	0.918129	0.912366	0.125899	0.453106	0.85786	-0.027906	0.998075	1.42	0.366526	0.831617	0.471021	ND	ND	ND	ND	ND	ND	ND	ND	ND	ND	ND	ND	ND	ND	ND	ND	ND	ND	ND	ND	ND	ND	ND	ND	-0.196397
Triglycerides__TG(22:2_32:4)	Triglycerides	TG(22:2_32:4)	0.260749	0.700219	0.347561	0.881429	0.636915	0.965729	-0.55015	0.323525	-0.759967	0.329815	-0.195646	0.950143	1.55396	0.0485967	-0.201	0.85786	-0.206955	0.976527	1.61019	0.366526	0.979058	0.366117	0.257559	0.997673	ND	ND	ND	ND	ND	ND	ND	ND	ND	ND	ND	ND	ND	ND	ND	ND	ND	ND	ND	ND	ND	ND	ND
Triglycerides__TG(22:4_32:0)	Triglycerides	TG(22:4_32:0)	0.0671756	0.905681	0.735758	0.817167	0.668494	0.94179	-1.15522	0.0755459	-0.335765	0.620035	0.532735	0.895328	0.403928	0.580024	0.580933	0.85786	0.299793	0.976527	0.486681	0.485912	0.418284	0.669615	-0.232918	0.997673	ND	ND	ND	ND	ND	ND	ND	ND	ND	ND	ND	ND	ND	ND	ND	ND	ND	ND	ND	ND	ND	ND	ND
Triglycerides__TG(22:4_32:2)	Triglycerides	TG(22:4_32:2)	0.507748	0.671843	0.387697	0.94246	0.786954	0.94179	-0.551832	0.432923	-0.594106	0.469596	0.383483	0.918129	1.12624	0.322372	0.176277	0.85786	0.401098	0.976527	0.698146	0.458399	0.305797	0.737028	0.142725	0.997673	ND	ND	ND	ND	ND	ND	ND	ND	ND	ND	ND	ND	ND	ND	ND	ND	ND	ND	ND	ND	ND	ND	ND
Triglycerides__TG(22:4_34:2)	Triglycerides	TG(22:4_34:2)	0.352843	0.687127	0.824568	0.750377	0.766251	0.94179	-0.928395	0.104969	-0.583745	0.424369	0.26476	0.928971	1.17265	0.296235	0.416454	0.85786	0.554589	0.976527	0.699323	0.479481	0.607113	0.490577	-0.498303	0.997673	0.625803	0.746672	0.15968	0.996956	-1.18213	0.50152	1.64489	0.394067	0.96328	0.576423	-1.73912	0.521806	-0.474415	0.707084	-0.568089	0.725619	-0.44494	0.997151	-0.911336	0.56576	-0.189177	0.984689	-0.814674
Triglycerides__TG(22:5_32:0)	Triglycerides	TG(22:5_32:0)	0.413645	0.671843	0.736313	0.783516	0.56922	0.94179	-0.727588	0.2558	0.156968	0.856921	0.564312	0.895328	0.430834	0.518002	0.427235	0.85786	0.132071	0.987879	0.684315	0.424733	0.356725	0.691403	-0.502376	0.997673	ND	ND	ND	ND	ND	ND	ND	ND	ND	ND	ND	ND	ND	ND	ND	ND	ND	ND	ND	ND	ND	ND	ND
Triglycerides__TG(22:5_32:1)	Triglycerides	TG(22:5_32:1)	0.450679	0.671843	0.624599	0.83026	0.707227	0.94179	-0.765872	0.36166	-0.289705	0.785338	0.723583	0.893472	0.459632	0.548652	0.473131	0.85786	-0.073831	0.990931	0.722905	0.464641	0.312642	0.737028	-0.421617	0.997673	ND	ND	-0.166778	0.996956	-0.884687	0.50152	ND	ND	0.850794	0.657596	ND	ND	ND	ND	ND	ND	-0.260054	0.997151	ND	ND	ND	ND	ND
Triglycerides__TG(22:5_34:1)	Triglycerides	TG(22:5_34:1)	0.306266	0.687127	0.850834	0.750377	0.65863	0.94179	-0.687936	0.339522	-0.193102	0.856921	0.423831	0.895328	0.647632	0.447017	0.423683	0.85786	0.323743	0.976527	0.504303	0.53991	0.635342	0.502098	-0.0167327	0.997673	0.903049	0.746672	0.173485	0.996956	-1.33243	0.50152	1.93369	0.370153	0.792529	0.57852	-1.8199	0.521806	-0.98695	0.40233	-1.14712	0.725619	-0.673686	0.997151	-0.657112	0.646975	0.0400716	0.984689	-0.9833
Triglycerides__TG(22:5_34:2)	Triglycerides	TG(22:5_34:2)	0.430299	0.671843	0.967916	0.671902	0.925318	0.94179	-0.636184	0.34737	-0.0991915	0.927475	0.553349	0.895328	1.01338	0.324089	0.416493	0.85786	0.648558	0.976527	0.719513	0.479481	0.577446	0.514327	-0.124061	0.997673	0.595314	0.746672	0.214642	0.996956	-1.38695	0.50152	1.62025	0.405183	0.800503	0.576423	-1.60982	0.521806	-0.780857	0.398353	-0.807094	0.725619	-0.667465	0.997151	-1.23358	0.522326	-0.278898	0.984689	-0.803792
Triglycerides__TG(22:5_34:3)	Triglycerides	TG(22:5_34:3)	0.377556	0.705186	0.879566	0.651662	0.806853	0.94179	-0.840132	0.122119	-0.12721	0.894876	0.554178	0.895328	0.782999	0.322372	0.61435	0.85786	0.0736491	0.990931	0.829332	0.458399	0.461618	0.613246	-0.298614	0.997673	0.403535	0.746672	0.210813	0.996956	-1.26209	0.50152	0.972323	0.415833	0.562951	0.622705	-1.11009	0.533124	-0.899646	0.351632	-0.684736	0.725619	-0.884161	0.997151	-0.938327	0.522326	0.367732	0.984689	-0.485991
Triglycerides__TG(22:6_32:0)	Triglycerides	TG(22:6_32:0)	0.342733	0.671843	0.61458	0.842007	0.767668	0.94179	-0.847191	0.122926	-0.0334533	0.975043	0.784957	0.893472	0.720755	0.357788	0.110549	0.892018	0.404888	0.976527	0.678475	0.464641	0.323516	0.725678	-0.46171	0.997673	0.474655	0.746672	0.748594	0.996956	-1.29546	0.50152	1.17193	0.39263	0.148455	0.81754	ND	ND	ND	ND	-0.143074	0.914215	-0.923764	0.997151	ND	ND	ND	ND	-1.16156
Triglycerides__TG(22:6_32:1)	Triglycerides	TG(22:6_32:1)	0.482307	0.671843	0.538546	0.920125	0.862135	0.94179	-0.841313	0.226637	-0.268279	0.856921	0.91309	0.885223	0.591664	0.346219	0.345851	0.85786	0.0933577	0.990931	0.650546	0.50737	0.310489	0.736823	-0.29252	0.997673	0.914077	0.746672	-0.52956	0.996956	-1.19897	0.50152	1.58875	0.358274	-0.241343	0.81209	ND	ND	-0.594473	0.40078	-1.0411	0.725619	-0.595119	0.997151	-0.773011	0.522326	-1.08992	0.984689	-0.725967
Triglycerides__TG(22:6_34:1)	Triglycerides	TG(22:6_34:1)	0.470031	0.671843	0.814888	0.800853	0.552815	0.94179	-0.63252	0.325108	-0.123757	0.923679	0.47101	0.895328	0.878813	0.355724	0.316918	0.85786	0.365493	0.976527	0.924359	0.449752	0.665695	0.490577	-0.305963	0.997673	0.736221	0.746672	-0.0966661	0.996956	-1.26421	0.50152	1.64699	0.394881	0.053293	0.946369	-1.67146	0.521806	-0.670413	0.510977	-1.28277	0.725619	-0.446618	0.997151	-0.803247	0.575524	-0.33455	0.984689	-0.485474
Triglycerides__TG(22:6_34:2)	Triglycerides	TG(22:6_34:2)	0.332046	0.671843	0.661457	0.817167	0.864213	0.94179	-0.750957	0.141601	-0.146738	0.904894	0.606951	0.895328	1.1296	0.296235	0.166249	0.865458	0.900632	0.976527	1.03404	0.424733	0.551125	0.588087	-0.259693	0.997673	0.455962	0.746672	0.202928	0.996956	-0.855971	0.50152	1.29601	0.467567	0.252322	0.807322	-1.14208	0.521806	-0.914562	0.411771	-0.853056	0.725619	-0.136242	0.997151	-1.13373	0.522326	-0.258746	0.984689	-0.23915
Triglycerides__TG(22:6_34:3)	Triglycerides	TG(22:6_34:3)	0.263947	0.687127	0.554478	0.920125	0.744916	0.94179	-0.567728	0.326429	-0.0967464	0.924028	0.534308	0.895328	0.604119	0.296235	0.347754	0.85786	0.283952	0.976527	0.826237	0.458399	0.550601	0.514327	-0.369172	0.997673	0.575677	0.746672	-0.465477	0.996956	-1.26303	0.50152	1.3792	0.370153	-0.365218	0.720442	-1.17796	0.521806	-1.13101	0.163154	-1.13705	0.725619	-0.726613	0.997151	-0.653979	0.522326	-0.588671	0.984689	-0.454764
Trihexosylceramides__Hex3Cer(d18:1_20:0)	Trihexosylceramides	Hex3Cer(d18:1_20:0)	0.628118	0.387136	0.193987	0.881429	0.0278837	0.985243	0.156573	0.528996	-0.157782	0.835159	-0.158924	0.918129	0.45149	0.17726	-0.108706	0.85786	-0.240302	0.976527	0.565637	0.424733	-0.399607	0.574695	-0.075739	0.997673	ND	ND	ND	ND	ND	ND	ND	ND	ND	ND	ND	ND	ND	ND	ND	ND	ND	ND	ND	ND	ND	ND	ND
Trihexosylceramides__Hex3Cer(d18:1_22:0)	Trihexosylceramides	Hex3Cer(d18:1_22:0)	0.429853	0.671843	0.184809	0.953597	-0.0246697	0.985243	-0.0929026	0.783981	0.0560054	0.936323	-0.100362	0.933799	0.245345	0.431016	0.184809	0.85786	-0.208231	0.976527	0.558452	0.424733	0.0554271	0.965247	-0.204126	0.997673	ND	ND	ND	ND	ND	ND	ND	ND	ND	ND	ND	ND	ND	ND	ND	ND	ND	ND	ND	ND	ND	ND	ND
Trihexosylceramides__Hex3Cer(d18:1/16:0)	Trihexosylceramides	Hex3Cer(d18:1/16:0)	0.49783	0.551346	0.365455	0.561463	0.422672	0.94179	0.44174	0.209777	0.376511	0.518298	0.0434289	0.973119	0.365034	0.355724	0.319326	0.85786	-0.289234	0.976527	0.422943	0.424733	-0.130502	0.828335	0.055264	0.997673	ND	ND	ND	ND	ND	ND	ND	ND	ND	ND	ND	ND	ND	ND	ND	ND	ND	ND	ND	ND	ND	ND	ND
Trihexosylceramides__Hex3Cer(d18:1/18:0)	Trihexosylceramides	Hex3Cer(d18:1/18:0)	1.07752	0.387136	0.671741	0.366411	0.616593	0.94179	0.935565	0.0330517	0.765085	0.177656	0.276697	0.895328	0.375933	0.435144	0.140025	0.85786	-0.111741	0.976527	0.601654	0.424733	-0.241189	0.67394	0.0406923	0.997673	ND	ND	ND	ND	-0.123735	0.793261	0.169925	0.843627	-0.522841	0.579543	ND	ND	-0.29956	0.779086	-0.365871	0.787449	ND	ND	ND	ND	ND	ND	ND
Trihexosylceramides__Hex3Cer(d18:1/24:1)	Trihexosylceramides	Hex3Cer(d18:1/24:1)	0.572758	0.484629	0.542318	0.366411	0.0605415	0.981523	-0.0625332	0.853407	0.274949	0.456146	-0.0448542	0.973119	0.0711332	0.792222	0.621839	0.85786	-0.407858	0.976527	0.651129	0.42971	0.161496	0.86028	-0.561599	0.997673	ND	ND	ND	ND	ND	ND	ND	ND	ND	ND	ND	ND	ND	ND	ND	ND	ND	ND	ND	ND	ND	ND	ND
Trihexosylceramides__Hex3Cer(d18:1/26:1)	Trihexosylceramides	Hex3Cer(d18:1/26:1)	0.495896	0.427202	0.726309	0.366411	0.0882402	0.980376	0.325971	0.218109	0.455072	0.445161	0.160769	0.901189	0.255366	0.511879	0.477674	0.85786	-0.604449	0.976527	0.685098	0.424733	0.143783	0.870898	-0.248754	0.997673	ND	ND	ND	ND	ND	ND	ND	ND	ND	ND	ND	ND	ND	ND	ND	ND	ND	ND	ND	ND	ND	ND	ND
Vitamins a Cofactors__Choline	Vitamins a Cofactors	Choline	0.433934	0.387136	0.347605	0.936974	-0.276737	0.965729	0.608097	0.0664897	0.586076	0.259581	-0.118209	0.950143	0.302998	0.383132	0.222445	0.85786	-0.570234	0.976527	0.105953	0.803466	0.0380932	0.981422	-0.721793	0.997673	-0.129469	0.746672	-0.0363657	0.996956	-0.430006	0.50152	-0.1147	0.573166	-0.364914	0.417307	-0.0838541	0.764405	-0.0369391	0.923406	-0.00782799	0.97733	-0.462226	0.997151	0.0409718	0.915968	-0.00782799	0.984689	-0.108432
[truncated: 1 more columns]

## Sheet: Plasma
Note: Metabolites reliably quantified in plasma (ND: Not Identified metabolites).
ID	Metabolite class	Metabolite name	Serum
			PTU												Phenytoin
			Low dose						High dose						Low dose						High dose
			Short		Long		Long+Recovery		Short		Long		Long+Recovery		Short		Long		Long+Recovery		Short		Long		Long+Recovery
			Log2 (FC)	adj.pvalue	Log2 (FC)	adj.pvalue	Log2 (FC)	adj.pvalue	Log2 (FC)	adj.pvalue	Log2 (FC)	adj.pvalue	Log2 (FC)	adj.pvalue	Log2 (FC)	adj.pvalue	Log2 (FC)	adj.pvalue	Log2 (FC)	adj.pvalue	Log2 (FC)	adj.pvalue	Log2 (FC)	adj.pvalue	Log2 (FC)	adj.pvalue
848000047	Acylcarnitines	Decanoylcarnitine (C10)	-0.0824491	0.980472	-0.144437	0.99468	0.344257	0.706516	-0.76625	0.000840996	-0.939311	3.359e-07	0.245983	0.397119	0.0318963	0.963424	-0.202526	0.9853	0.175517	0.831999	-0.113546	0.716469	-0.384495	0.0349603	0.458766	0.286841
848000048	Acylcarnitines	Dodecanoylcarnitine (C12)	-0.183594	0.870185	-0.195562	0.99468	0.0636483	0.97748	-0.691415	0.000121422	-1.12423	2.05516e-07	0.0596819	0.820466	0.0217406	0.963424	-0.204452	0.9853	0.0328426	0.966935	-0.17707	0.588627	-0.536225	0.0054364	0.195664	0.660558
848000049	Acylcarnitines	Tetradecanoylcarnitine (C14)	-0.230781	0.903018	-0.129543	0.99468	0.336104	0.97748	-0.991997	1.60706e-05	-1.27649	2.1893e-06	0.357642	0.295618	-0.228351	0.566134	-0.173737	0.9853	0.0314647	0.974857	-0.46147	0.213354	-0.635803	0.0202379	0.543876	0.301254
848000050	Acylcarnitines	Hexadecenoylcarnitine (C16:1)	-0.122213	0.980472	-0.331762	0.99468	0.347369	0.97748	-1.00341	0.000126917	-1.48052	9.14311e-06	0.350387	0.344763	-0.0599742	0.953636	-0.222165	0.9853	-0.0755462	0.966935	-0.547421	0.25093	-0.795523	0.0135694	0.693967	0.329023
848000051	Acylcarnitines	Hexadecanoylcarnitine (C16)	-0.211849	0.870185	-0.109668	0.99468	0.193616	0.97748	-0.810311	3.88733e-06	-0.879052	9.78437e-08	0.155798	0.397658	-0.201391	0.546182	-0.243709	0.9853	-0.0745753	0.966935	-0.516664	0.0199139	-0.594158	0.000709387	0.260034	0.366662
848000052	Acylcarnitines	Octadecadienylcarnitine (C18:2)	-0.346255	0.777722	-0.178862	0.99468	0.467506	0.97748	-1.11471	3.69826e-07	-1.28999	1.01764e-06	0.341206	0.342599	0.0736015	0.940487	-0.314197	0.9853	0.0528526	0.966935	-0.457604	0.127602	-0.700051	0.00897053	0.345738	0.379229
848000053	Acylcarnitines	Octadecenoylcarnitine (C18:1)	-0.333717	0.870185	-0.0717583	0.99468	0.114433	0.97748	-1.05926	3.20452e-06	-1.0771	2.60356e-07	0.121003	0.547047	-0.0571936	0.953636	-0.159992	0.9853	-0.116982	0.90167	-0.506074	0.0918117	-0.542477	0.0135694	0.359212	0.329023
848000054	Acylcarnitines	Octadecanoylcarnitine (C18)	-0.113693	0.903018	-0.0355069	0.99468	0.150139	0.97748	-0.320635	0.00931322	-0.204246	0.120726	0.0669488	0.82468	0.0226329	0.963424	-0.149086	0.9853	-0.0758521	0.90167	-0.209577	0.25093	-0.511587	0.0101562	0.0475726	0.971543
868000022	Acylcarnitines	Carnitine (C0)	0.00814621	0.999815	0.157317	0.99468	0.0858817	0.97748	-0.430072	3.09324e-05	-0.279513	0.00392799	-0.082412	0.515433	-0.0440182	0.934924	-0.0472901	0.9853	0.103202	0.831999	-0.0409993	0.71691	-0.0777346	0.610529	-0.0193228	0.971543
868000043	Acylcarnitines	Acetylcarnitine (C2)	-0.0925027	0.903018	0.081928	0.99468	0.0767153	0.97748	-0.789971	9.6004e-07	-0.670068	6.8758e-07	0.0119443	0.944641	-0.140874	0.373225	-0.0372629	0.9853	0.116467	0.831999	-0.0425528	0.759691	-0.0458434	0.819226	0.16455	0.585963
868000048	Acylcarnitines	Propionylcarnitine	-0.122569	0.903018	0.237794	0.99468	0.0931835	0.97748	-0.621901	0.00059403	-0.481473	0.00560638	-0.33394	0.22713	-0.126796	0.880714	0.0215768	0.986248	0.0617801	0.966935	-0.0770131	0.768012	-0.0147068	0.967507	0.0909214	0.952102
868000053	Acylcarnitines	Butyrylcarnitine (C4)	-0.0588291	0.98371	0.158055	0.99468	-0.035615	0.97748	-0.628725	7.55282e-05	-0.381761	0.000200652	-0.192661	0.238524	-0.0509939	0.940487	0.10864	0.9853	0.0726165	0.885633	-0.0250773	0.92931	0.0815698	0.744596	0.11045	0.846134
868000059	Acylcarnitines	Hexanoylcarnitine (C6); Fumarylcarnitine (C4:1-DC)	-0.164114	0.903018	-0.00747787	0.99468	0.355156	0.706516	-1.20526	2.55855e-06	-1.28286	2.87356e-08	0.233452	0.248631	-0.0809926	0.934924	-0.206975	0.9853	0.329475	0.421694	-0.172398	0.58079	-0.222083	0.214555	0.500675	0.0311344
868000064	Acylcarnitines	Octanoylcarnitine (C8)	0.0144887	0.999815	-0.159461	0.99468	0.228028	0.97748	-1.0212	1.40808e-05	-1.13887	1.87438e-06	0.148242	0.607938	0.121793	0.839329	-0.288933	0.9853	0.206683	0.798853	-0.0195247	0.958605	-0.418815	0.110007	0.379423	0.329023
838000009	Amino Acid Related	5-Oxoproline	-0.00787392	0.999815	0.02968	0.99468	-0.0161384	0.97748	-0.220482	0.0113234	-0.34666	0.00123679	-0.0770692	0.630286	0.0316885	0.953636	0.127059	0.9853	0.100121	0.831999	0.0627883	0.737711	0.0279135	0.915398	-0.0390407	0.962035
838000046	Amino Acid Related	Ornithine	0.124302	0.903018	0.030763	0.99468	-0.0344884	0.97748	0.139455	0.522753	0.0244626	0.817729	-0.016135	0.944641	0.256458	0.554315	0.0724653	0.9853	0.122655	0.831999	0.19127	0.582984	0.160763	0.303494	0.046071	0.962035
838000405	Amino Acid Related	N,N-Dialkylglycine	0.0308987	0.999815	-0.0944715	0.99468	0.0582682	0.97748	0.20607	0.463037	0.0877863	0.621405	-0.0989533	0.693267	0.0239315	0.98077	-0.106243	0.9853	0.0156932	0.974857	0.370047	0.404013	-0.125779	0.64241	0.135651	0.78377
838000437	Amino Acid Related	trans-4-Hydroxyproline	0.237752	0.777722	0.0505841	0.99468	-0.118599	0.97748	-0.36697	0.00118855	-0.400243	0.00607576	-0.175677	0.321128	0.139607	0.562317	-0.11261	0.9853	-0.0873785	0.831999	-0.113632	0.605251	-0.408174	0.0349603	-0.0689128	0.952102
838000547	Amino Acid Related	3-Hydroxyindole	-0.336028	0.892891	0.181908	0.99468	-0.0562523	0.97748	0.214051	0.429595	0.916119	0.00120719	0.118695	0.791488	-0.0925458	0.929865	0.263478	0.9853	0.225935	0.831999	-0.549077	0.191017	0.0281087	0.961362	0.0559493	0.974375
838000553	Amino Acid Related	Indole-3-acetic acid	-0.39449	0.870185	-0.116945	0.99468	-0.057699	0.97748	0.349181	0.226064	0.637864	0.0129731	-0.256893	0.440329	-0.112343	0.934924	0.0655669	0.986248	-0.240959	0.831999	-0.123923	0.84388	-0.105449	0.823199	-0.127677	0.93212
838000837	Amino Acid Related	3-Hydroxyisobutyrate	-0.288812	0.870185	0.087533	0.99468	0.142738	0.97748	-0.400577	0.00907127	-0.237596	0.0642422	-0.264498	0.226178	-0.10757	0.844325	0.0823757	0.9853	0.110313	0.843504	-0.388864	0.0440724	-0.367629	0.0178605	0.124181	0.802577
838001677	Amino Acid Related	Cystine	0.0590405	0.999815	-0.0907391	0.99468	-0.186434	0.97748	-0.301195	0.16167	-0.246205	0.243279	-0.46639	0.14117	-0.0351347	0.963424	-0.0261022	0.986248	-0.0256305	0.966935	0.12378	0.665319	-0.197284	0.636064	-0.349055	0.329023
838001833	Amino Acid Related	Ketoleucine	-0.153698	0.903018	0.0339085	0.99468	0.0642302	0.97748	-0.23206	0.240278	-0.429322	0.000932112	-0.356126	0.107548	0.0194435	0.978763	0.230397	0.9853	0.0260905	0.966935	-0.0760785	0.83147	-0.263732	0.129521	0.0409315	0.971543
838002141	Amino Acid Related	Homocysteine	-0.356229	0.870185	0.0283747	0.99468	-0.290918	0.97748	-0.0615079	0.814142	-0.741827	0.0141926	-0.238435	0.658163	-0.134698	0.934924	ND	ND	0.0741776	0.966935	-0.194372	0.715667	-0.123641	0.828149	-0.0274306	0.974375
848000001	Amino Acid Related	Xanthurenic acid	0.226766	0.777722	0.0214213	0.99468	-0.0676575	0.97748	0.0948132	0.470981	0.0959816	0.521572	-0.316963	0.129785	-0.0745857	0.899026	-0.0532746	0.9853	-0.101663	0.885633	0.07254	0.734387	-0.161693	0.435752	-0.158683	0.6062
858000061	Amino Acid Related	Indole-3-propionic acid	-0.0754856	0.977786	0.0222077	0.99468	-0.11374	0.97748	0.0353328	0.8077	0.0915363	0.498325	-0.137748	0.522172	0.0507606	0.940487	0.0994285	0.9853	-0.112307	0.848092	0.0355582	0.885197	-0.0441022	0.823199	-0.0408207	0.971543
868000003	Amino Acid Related	N,N-Dimethylglycine	-0.341135	0.777722	-0.057322	0.99468	-0.020898	0.97748	-0.86545	5.37971e-06	-1.28339	4.07438e-08	-0.28778	0.134726	0.00855635	0.978696	-0.0414185	0.9853	0.0377118	0.966935	-0.181023	0.470017	-0.466627	0.0736426	0.0845264	0.846134
868000005	Amino Acid Related	Betaine	-0.0291876	0.980472	0.0778387	0.99468	0.0209929	0.97748	-0.119828	0.00846922	-0.0812875	0.192246	0.0695645	0.623423	0.0307634	0.815042	0.0636074	0.9853	0.0806481	0.831999	0.0406665	0.715667	0.0119497	0.941061	0.108287	0.724642
868000006	Amino Acid Related	N-Acetylglycine	-0.0323329	0.980472	0.0828237	0.99468	0.0143194	0.97748	-0.139957	0.00471931	-0.0783346	0.193122	0.0743763	0.618893	0.0366484	0.792803	0.0553407	0.9853	0.0941207	0.831999	0.0473536	0.665319	0.0333476	0.819465	0.129327	0.639813
868000007	Amino Acid Related	2-Methylserine	0.117678	0.870185	0.00616304	0.99468	-0.0276245	0.97748	-0.307221	0.000620237	-0.421331	1.87438e-06	0.13036	0.547723	0.107644	0.568407	0.0655546	0.9853	0.161421	0.78187	0.230473	0.191017	0.151915	0.295918	0.0211238	0.974375
868000010	Amino Acid Related	Pipecolic acid	0.228877	0.777722	0.125564	0.99468	0.18382	0.97748	0.39672	0.00446394	0.530645	0.000818711	0.226612	0.22713	-0.0194814	0.963424	-0.256953	0.9853	0.152645	0.78187	0.207892	0.470017	0.324045	0.129521	0.383829	0.229673
868000015	Amino Acid Related	Proline betaine	-0.0574795	0.98371	-0.0251212	0.99468	-0.00131565	0.996583	-0.0141849	0.894991	0.0928984	0.483086	0.289978	0.135444	0.111309	0.66554	-0.162426	0.9853	-0.110351	0.831999	-0.0870643	0.654636	-0.089363	0.760591	0.149405	0.652958
868000017	Amino Acid Related	N-Acetylserine	0.128965	0.98371	-0.0406889	0.99468	-0.125036	0.97748	0.111917	0.723566	-0.431164	0.120726	-0.292586	0.548669	0.40242	0.562317	-0.310067	0.9853	0.113405	0.959894	0.0490175	0.950465	-0.354583	0.394585	-0.0651484	0.971543
868000019	Amino Acid Related	N-Acetylhistamine	0.110784	0.927681	0.0964839	0.99468	-0.085892	0.97748	0.0586959	0.745734	0.316381	0.0560094	-0.0480124	0.872877	-0.0168568	0.969559	0.0037977	0.990464	-0.137789	0.831999	0.31744	0.25093	0.163938	0.633713	0.023559	0.974375
868000023	Amino Acid Related	N-Methylglutamate	0.230628	0.927681	-0.0725402	0.99468	-0.200638	0.97748	0.492679	0.274398	0.526004	0.205867	0.284393	0.62895	0.294316	0.899026	0.149321	0.9853	0.100035	0.966935	0.468712	0.588627	0.320244	0.618772	0.440786	0.652958
868000024	Amino Acid Related	N-Acetylcysteine	-0.377008	0.903018	-0.084035	0.99468	-0.564797	0.706516	-0.327779	0.295937	-0.401821	0.22979	0.294995	0.526101	-0.212819	0.821142	-0.288885	0.9853	0.205285	0.90167	-0.542601	0.384039	-0.535481	0.322672	0.0499983	0.974375
868000026	Amino Acid Related	Methionine sulfoxide	0.0833573	0.948999	0.10663	0.99468	0.0407914	0.97748	0.138773	0.24367	-0.133464	0.0602303	0.124828	0.515433	0.12769	0.66554	0.135673	0.9853	-0.0303287	0.966935	0.0788126	0.730809	-0.0404276	0.839526	0.0267381	0.971543
868000032	Amino Acid Related	N-Acetylleucine	-0.0214259	0.999815	-0.1414	0.99468	-0.13354	0.97748	0.353805	0.0683692	-0.13813	0.573608	-0.599645	0.016947	0.182673	0.66554	0.473197	0.9853	0.129763	0.885633	0.0147537	0.958605	-0.105855	0.819465	-0.116832	0.93212
868000035	Amino Acid Related	epsilon-Acetyllysine	0.0971229	0.948606	-0.219905	0.99468	0.054258	0.97748	0.037068	0.82563	-0.169366	0.100136	-0.135147	0.552728	-0.08553	0.934924	-0.0780745	0.9853	-0.0985431	0.831999	-0.131725	0.665319	-0.409506	0.0178605	-0.0234885	0.971543
868000039	Amino Acid Related	Phenylacetylglycine	-0.429352	0.681539	-0.0873779	0.99468	-0.0285245	0.97748	0.0903271	0.740927	0.0191043	0.948322	-0.17598	0.671384	0.0788866	0.939862	0.2793	0.9853	-0.149806	0.885633	-0.272237	0.588086	0.172	0.621859	0.00965703	0.976981
868000041	Amino Acid Related	N-Acetylhistidine	-0.135129	0.903018	0.160346	0.99468	-0.116143	0.97748	0.320983	0.0281705	0.102371	0.566411	-0.426592	0.0526574	0.284935	0.535146	0.328484	0.9853	0.0528056	0.931044	0.592907	0.0199139	0.360713	0.219355	-0.0691182	0.952102
868000044	Amino Acid Related	N-Carboxymethyllysine	0.119947	0.927681	0.0997669	0.99468	0.0685751	0.97748	0.246666	0.130887	0.342602	0.00773486	0.0956773	0.742937	0.0746642	0.940487	0.190138	0.9853	-0.0178245	0.974857	0.177941	0.588627	-0.0256103	0.922762	0.0815976	0.952102
868000046	Amino Acid Related	Kynurenine	0.024372	0.999815	0.205979	0.99468	-0.0468712	0.97748	-0.0310612	0.921581	-0.744164	0.0026493	0.0784704	0.860811	-0.117518	0.934924	0.0937234	0.9853	0.135764	0.877825	-0.454774	0.241007	-0.917635	0.00897053	0.534686	0.329023
868000050	Amino Acid Related	Carnosine	0.2217	0.927681	0.00950309	0.99468	0.500195	0.97748	0.505047	0.271697	-0.593289	0.0607714	-0.253606	0.547047	0.39581	0.628357	0.127625	0.9853	0.244104	0.885633	-0.0614148	0.934151	0.0309238	0.967507	0.144066	0.952335
868000057	Amino Acid Related	N-Acetyltryptophan	0.0277125	0.999815	0.125975	0.99468	-0.171839	0.97748	-0.268401	0.0505014	-0.326195	0.0276222	-0.372024	0.0792875	-0.0110199	0.982191	0.256254	0.9853	-0.0488085	0.966935	0.044925	0.870844	-0.28461	0.129521	-0.0623565	0.952335
868000060	Amino Acid Related	Phenylacetylglutamine	-0.123509	0.948606	0.125239	0.99468	0.171411	0.97748	0.672372	0.00492168	0.474172	0.160728	-0.328777	0.301059	0.0864649	0.953636	0.128679	0.9853	-0.33165	0.78187	-0.501855	0.20093	-0.042959	0.946977	-0.395841	0.438672
868000065	Amino Acid Related	Ophthalmic acid	-0.770509	0.777722	-0.109151	0.99468	0.255305	0.97748	-1.54257	6.65263e-06	-2.09862	4.57709e-07	0.540762	0.248631	-0.399295	0.433029	0.315645	0.9853	0.117767	0.966935	-0.781375	0.20093	-0.485714	0.382637	0.940227	0.301254
868000066	Amino Acid Related	Argininosuccinate	-0.0500377	0.999815	-0.0558872	0.99468	-0.192349	0.97748	0.0728973	0.659327	-0.331196	0.0979474	0.154438	0.591425	-0.063146	0.940487	-0.166294	0.9853	0.0264233	0.966935	-0.32172	0.213354	-0.422516	0.131329	0.126616	0.846134
868000071	Amino Acid Related	S-Adenosylhomocysteine	0.415028	0.892891	0.176124	0.99468	0.158226	0.97748	0.26669	0.546452	-0.191555	0.35427	-0.039878	0.944641	0.447016	0.562317	0.375686	0.9853	0.0754071	0.966935	0.0432006	0.950465	0.315329	0.41192	0.248969	0.797504
878000009	Amino Acid Related	Citrulline	0.00494226	0.999815	-0.0122754	0.99468	-0.0707217	0.97748	0.156571	0.132764	0.111835	0.215107	-0.0136965	0.944641	0.0183153	0.963424	0.0645299	0.9853	-0.0122924	0.968802	0.0022208	0.985478	-0.0894707	0.576046	-0.00816336	0.974375
878000018	Amino Acid Related	Taurine	0.143431	0.903018	0.0710016	0.99468	0.179799	0.97748	0.303657	0.0494041	0.247856	0.0495636	-0.0362821	0.911441	0.032857	0.953636	0.00534128	0.990464	0.0847003	0.885633	0.0502147	0.875847	0.0637241	0.744596	0.0784908	0.952102
878000038	Amino Acid Related	4-Hydroxyphenylpyruvate	-0.898283	0.777722	0.267792	0.99468	-0.273577	0.97748	-0.338147	0.530322	0.343414	0.409442	-0.144948	0.925027	-0.400975	0.792803	0.725314	0.9853	-0.310563	0.949966	0.343385	0.759691	-0.210666	0.79547	-0.241644	0.952335
878000039	Amino Acid Related	Creatinine	-0.0547923	0.98371	0.0978352	0.99468	0.0443378	0.97748	0.346311	0.00211491	0.369249	0.00996238	0.016179	0.944641	0.141982	0.589376	0.104617	0.9853	-0.0101	0.976157	-0.0755725	0.782992	-0.346785	0.112283	-0.0187518	0.974375
878000041	Amino Acid Related	Creatine	-0.120804	0.903018	-0.00921392	0.99468	0.32832	0.97748	-0.649363	0.000812648	-0.216524	0.168875	-0.292712	0.397119	-0.016012	0.963424	0.00786926	0.990464	0.331537	0.421694	0.0518782	0.870459	0.304842	0.09799	0.326895	0.362109
878000043	Amino Acid Related	Kynurenic acid	-0.344926	0.870185	0.0632734	0.99468	-0.166139	0.97748	-0.185042	0.544315	-0.088365	0.663426	-0.165994	0.618893	-0.224887	0.792803	0.459656	0.9853	0.20154	0.831999	-0.087006	0.885165	-0.245003	0.41192	0.139723	0.901141
878000044	Amino Acid Related	Phosphocreatine	-0.00160996	0.999815	0.215358	0.99468	0.167366	0.97748	-0.000345167	0.998303	0.0401815	0.8814	-0.075548	0.842445	0.102035	0.925815	0.106097	0.9853	0.107867	0.949966	-0.259366	0.470017	0.0350017	0.938854	0.256601	0.765747
878000050	Amino Acid Related	Indole-3-lactic acid	0.36756	0.777722	-0.0326686	0.99468	-0.120378	0.97748	0.471543	0.0378949	-0.255062	0.144421	-0.129784	0.770366	0.328193	0.446347	0.138078	0.9853	0.0390358	0.968802	0.21261	0.601957	-0.444657	0.0769306	-0.187027	0.846134
878000062	Amino Acid Related	3-Indoxylsulfate	-0.0917479	0.980472	0.23014	0.99468	0.210777	0.97748	0.216633	0.16167	0.576907	0.0296628	0.281941	0.236012	-0.141325	0.805334	0.359191	0.9853	0.167719	0.831999	-0.364218	0.221204	0.0674138	0.905627	0.035654	0.974375
838000003	Amino Acids	Alanine	0.0254241	0.999815	0.207899	0.99468	0.0840417	0.97748	-0.208146	0.0179682	-0.163214	0.093297	-0.150444	0.397119	0.203963	0.456598	0.210523	0.9853	0.259423	0.634077	0.178212	0.241007	0.162314	0.33867	0.00975106	0.974375
838000004	Amino Acids	Glycine	0.0295415	0.999815	0.0308243	0.99468	-0.0560409	0.97748	-0.259379	0.0125207	-0.291839	0.0157155	-0.152897	0.545259	0.111721	0.555003	0.0769399	0.9853	0.0736016	0.890563	0.111867	0.582984	-0.296895	0.129521	0.0632575	0.952102
838000006	Amino Acids	Threonine	0.199561	0.870185	0.0457222	0.99468	-0.0431859	0.97748	-0.290198	0.0020345	-0.397718	9.91319e-05	0.153885	0.547723	0.178647	0.512667	0.188876	0.9853	0.193364	0.78187	0.303299	0.124857	0.251697	0.185105	0.040278	0.971543
838000008	Amino Acids	Methionine	0.0713338	0.903018	0.152369	0.99468	0.0703525	0.97748	0.0363864	0.487132	0.022116	0.822475	-0.143486	0.280966	0.11699	0.373225	0.0719756	0.9853	0.123239	0.798853	-0.0533108	0.689421	0.0551548	0.744596	-0.0437629	0.952102
838000010	Amino Acids	Cysteine	-0.00568684	0.999815	-0.0780584	0.99468	-0.0711076	0.97748	-0.2071	0.337228	-0.156471	0.158773	-0.110774	0.547047	-0.037013	0.963424	0.139525	0.9853	0.0948043	0.831999	0.10194	0.768012	0.125916	0.435405	-0.146233	0.731967
838000013	Amino Acids	Lysine	0.407299	0.777722	0.0598412	0.99468	0.0274164	0.97748	-0.111182	0.377796	-0.247521	0.0311524	-0.289651	0.135444	0.166029	0.568407	0.0173259	0.986248	0.00105721	0.992993	-0.00228174	0.985478	0.0259988	0.933512	-0.166626	0.691636
838000045	Amino Acids	Glutamine	-0.0469658	0.927681	-0.0442264	0.99468	-0.0542565	0.97748	0.128536	0.417291	-0.234203	0.14069	-0.0850029	0.620723	0.133952	0.566134	-0.0429133	0.986248	-0.0550805	0.966935	0.101796	0.652607	-0.249567	0.354349	0.0706336	0.952102
838000052	Amino Acids	Serine	0.171655	0.851985	0.184639	0.99468	-0.0286505	0.97748	-0.124886	0.153232	-0.136293	0.117602	-0.178616	0.22713	0.0740707	0.792803	0.181074	0.9853	0.165947	0.798853	0.174689	0.213354	0.194948	0.194112	0.0158019	0.974375
838000070	Amino Acids	Valine	-0.0110877	0.999815	0.0135171	0.99468	0.000977516	0.996583	-0.0221916	0.790078	-0.238577	0.0129731	-0.282691	0.0652436	0.132165	0.446347	0.122618	0.9853	0.129149	0.695778	0.120984	0.404013	0.0365785	0.842023	0.00998079	0.974375
838000072	Amino Acids	Aspartate	0.012603	0.999815	0.0109649	0.99468	0.0905247	0.97748	-0.0254699	0.921581	-0.0800394	0.667739	-0.0527985	0.931468	0.0762868	0.945558	-0.0944221	0.9853	0.191726	0.831999	0.130691	0.755404	-0.227979	0.526277	-0.0357666	0.974375
838000073	Amino Acids	Phenylalanine	0.0334695	0.958419	0.0266183	0.99468	-0.00469507	0.97748	0.0859887	0.164665	-0.0803168	0.235246	-0.177735	0.134726	0.092302	0.538866	0.00938027	0.986248	0.0750685	0.831999	-0.00670747	0.958605	-0.0960208	0.526277	0.00677024	0.974375
838000074	Amino Acids	Isoleucine	-0.000290273	0.999815	0.00926978	0.99468	0.0182572	0.97748	-0.177734	0.0302105	-0.450594	0.000112505	-0.208395	0.185291	0.108114	0.550099	0.118457	0.9853	0.135724	0.78187	0.0212952	0.92931	-0.0887434	0.610529	0.0874234	0.846134
838000075	Amino Acids	Leucine	0.0141827	0.999815	0.00804836	0.99468	-0.00181873	0.994626	0.0162555	0.847526	-0.245567	0.0170818	-0.260551	0.0792875	0.147941	0.456598	0.116312	0.9853	0.146237	0.78187	0.114993	0.470017	0.023695	0.92144	0.0411359	0.960695
838000078	Amino Acids	Asparagine	0.119395	0.903018	0.0824436	0.99468	-0.00467897	0.987223	0.148546	0.342199	-0.0706766	0.610125	-0.123509	0.593732	0.265218	0.456598	0.154212	0.9853	0.0830745	0.951293	0.334935	0.20093	0.118774	0.548477	0.0113603	0.974375
838000079	Amino Acids	Proline	0.072075	0.903018	0.11066	0.99468	-0.00972847	0.97748	-0.0419474	0.470981	0.0222564	0.782518	-0.148789	0.22713	0.13028	0.408797	0.128885	0.9853	0.133577	0.798853	0.0767527	0.601957	0.0635345	0.651293	-0.0514061	0.952102
838000088	Amino Acids	Glutamate	-0.107347	0.927681	-0.0837401	0.99468	0.0434059	0.97748	-0.70267	4.26859e-05	-0.794079	2.59098e-06	-0.230907	0.204851	-0.13199	0.75148	0.060638	0.9853	0.0837196	0.885633	-0.296717	0.213354	-0.0510548	0.839526	-0.0677661	0.952102
838000160	Amino Acids	Tyrosine	0.127191	0.870185	0.0975718	0.99468	0.0326278	0.97748	0.0564334	0.619884	-0.0667135	0.567823	-0.136478	0.327469	0.0887066	0.708043	0.00728659	0.990464	0.118549	0.831999	-0.0125336	0.957265	-0.0416975	0.872486	-0.0275506	0.971543
838000466	Amino Acids	Histidine	-0.0754778	0.903018	0.0870562	0.99468	0.0651545	0.97748	0.103438	0.0695862	0.0412989	0.714315	-0.149953	0.397119	0.209676	0.373225	0.117613	0.9853	0.118962	0.831999	0.320945	0.0199139	0.235124	0.151186	0.0421039	0.971543
878000004	Amino Acids	Tryptophan	0.175752	0.870185	0.0896744	0.99468	0.0112585	0.97748	0.036505	0.814142	0.182575	0.332366	-0.220387	0.327469	-0.0133215	0.978696	0.0819333	0.9853	0.0506561	0.966935	0.0745793	0.724068	-0.0565439	0.873617	-0.111769	0.901141
878000006	Amino Acids	Arginine	0.285132	0.777722	0.153679	0.99468	-0.0486454	0.97748	-0.159098	0.261292	-0.211793	0.0547161	-0.477059	0.0233395	-0.0847432	0.934924	0.124392	0.9853	-0.0215216	0.968802	-0.00796	0.961239	0.00880646	0.97085	-0.237626	0.362109
838001931	Bile Acids	Cholic acid	-0.588194	0.903018	0.195167	0.99468	1.26488	0.97748	-0.357145	0.619959	1.51427	0.0661777	1.48661	0.22713	0.121172	0.963424	0.478718	0.9853	0.12921	0.966935	-0.135476	0.92085	-0.0553559	0.97085	1.3204	0.362109
878000046	Bile Acids	Glycodeoxycholic acid	-0.354794	0.988835	1.05572	0.99468	ND	ND	ND	ND	ND	ND	ND	ND	-0.0723406	0.98603	0.995786	0.9853	ND	ND	-0.575274	0.782038	1.4104	0.323461	ND	ND
78000010	Biogenic Amines	Serotonin	0.979041	0.870185	0.0431164	0.99468	-0.0624488	0.97748	0.686017	0.257697	0.3493	0.193533	-0.560811	0.135444	0.713086	0.66554	0.193778	0.9853	-0.400142	0.78187	-0.240858	0.715667	0.666318	0.271328	-0.41541	0.572933
78000035	Biogenic Amines	Histamine	0.805251	0.870185	-0.176271	0.99468	0.119017	0.97748	0.279212	0.64692	-0.1849	0.563282	-0.530297	0.145168	0.17918	0.947261	0.20291	0.9853	-0.283788	0.831999	0.0403303	0.958605	0.490573	0.359744	-0.285843	0.846134
838000011	Biogenic Amines	Putrescine	0.0217006	0.999815	0.125321	0.99468	0.165467	0.97748	-0.39743	0.00859724	-0.82318	0.000200652	0.104593	0.770366	-0.0237537	0.963424	-0.142763	0.9853	0.0333231	0.966935	0.0178152	0.957265	-0.333868	0.17343	0.235197	0.587449
838000039	Biogenic Amines	Spermidine	-0.0790081	0.968388	-0.369246	0.99468	0.15821	0.97748	-0.484329	0.0180187	-0.925955	0.000388465	-0.151158	0.770366	-0.231378	0.747189	-0.366154	0.9853	0.0899001	0.966935	-0.166664	0.688703	-0.523228	0.0541654	0.212423	0.846134
838000014	Carbohydrates and Related	myo-Inositol	-0.122102	0.927681	0.104592	0.99468	0.0417819	0.97748	0.0671957	0.699326	0.186281	0.108902	0.0432934	0.848287	-0.0252894	0.963424	-0.0110794	0.990464	0.0791101	0.859548	-0.0632948	0.849576	0.101173	0.681797	0.203159	0.366662
838000017	Carbohydrates and Related	Sucrose	0.923691	0.870185	0.0782804	0.99468	0.453511	0.97748	0.264547	0.703749	-0.151232	0.823463	-0.0978723	0.903291	0.281616	0.934924	0.180739	0.9853	0.840312	0.874158	0.352153	0.759691	-0.175154	0.879932	0.429104	0.846134
838000025	Carbohydrates and Related	Arabinose	0.0857082	0.999815	0.0961804	0.99468	-0.266143	0.97748	0.00248468	0.993012	0.035189	0.907463	0.194902	0.618893	-0.0431719	0.963424	0.12375	0.9853	0.0318514	0.968802	0.0642117	0.875847	-0.0727795	0.879932	-0.102138	0.971543
838000028	Carbohydrates and Related	Mannose	0.145809	0.870185	-0.00811079	0.99468	-0.2022	0.706516	-0.0630356	0.629966	-0.123098	0.45577	-0.149397	0.397696	0.000856982	0.997584	-0.0536943	0.9853	-0.140875	0.798853	0.0561533	0.816229	-0.0436331	0.839526	-0.112723	0.846134
838000037	Carbohydrates and Related	Glucose	0.107278	0.927681	-0.0576588	0.99468	-0.159757	0.97748	-0.0185791	0.938976	0.0455084	0.817729	-0.120441	0.705749	0.0502423	0.953636	-0.0125016	0.990464	-0.13803	0.831999	0.0366135	0.92931	-0.00779002	0.977422	-0.203676	0.778701
838000054	Carbohydrates and Related	Erythrol	0.0164563	0.999815	0.247812	0.99468	0.0366785	0.97748	0.0195167	0.879438	0.174898	0.0437021	0.0323155	0.921407	0.0603305	0.934924	0.0701344	0.9853	-0.0134714	0.973027	-0.0242507	0.925555	-0.0375831	0.819465	0.0493236	0.952102
838000106	Carbohydrates and Related	Lactose	0.225877	0.98371	-0.246145	0.99468	0.151882	0.97748	0.0831775	0.800199	-0.051495	0.8469	0.174351	0.718499	0.0311823	0.963424	-0.255428	0.9853	0.183125	0.831999	0.179118	0.791748	-0.314752	0.260808	-0.0119219	0.974375
838000407	Carbohydrates and Related	Deoxyribonucleic acids, total	-0.0555431	0.98371	-0.0389847	0.99468	-0.063507	0.97748	-0.209217	0.0775527	-0.568607	2.7115e-05	-0.0246699	0.94221	0.155215	0.640387	-0.0581063	0.9853	0.0904869	0.831999	-0.17619	0.385747	-0.30654	0.0349603	0.0837741	0.952102
838000463	Carbohydrates and Related	1,5-Anhydrosorbitol	0.0687101	0.98371	-0.0684023	0.99468	-0.132005	0.97748	0.125711	0.458447	-0.043729	0.785535	-0.444787	0.088462	0.168096	0.792803	-0.0306533	0.9853	-0.155297	0.831999	0.301661	0.25093	0.38209	0.185105	0.0324708	0.971543
838000545	Carbohydrates and Related	Xylitol	0.136032	0.927681	-0.240671	0.99468	-0.194034	0.97748	-0.624603	0.0357022	-0.578573	0.0402487	0.0228429	0.958205	0.170498	0.880714	0.112405	0.9853	-0.296714	0.831999	0.414985	0.300181	0.441775	0.129521	-0.190837	0.846134
838000551	Carbohydrates and Related	Glucuronic acid	-0.198804	0.903018	0.0202753	0.99468	-0.05469	0.97748	-0.523884	0.000216385	-0.423548	0.0149054	0.0564571	0.911423	0.0954323	0.918284	-0.0672256	0.9853	0.0107051	0.992993	0.612944	0.191017	0.504863	0.0929595	0.0622631	0.971543
838000620	Carbohydrates and Related	scyllo-Inositol	-0.172287	0.927681	0.101563	0.99468	0.450368	0.706516	0.0493553	0.800199	0.279617	0.259672	0.23561	0.475515	-0.290977	0.408797	-0.13002	0.9853	0.153707	0.831999	0.138147	0.683357	0.536187	0.0769306	0.455824	0.301254
838000822	Carbohydrates and Related	Erythronic acid	0.12477	0.927681	-0.0527666	0.99468	0.118258	0.97748	0.0375812	0.81614	-0.0491394	0.665084	-0.105871	0.607938	0.096681	0.852317	0.0389894	0.9853	0.0448163	0.966935	0.180907	0.601957	-0.143246	0.556027	-0.158004	0.765747
838001840	Carbohydrates and Related	Mannosamine	-0.0403537	0.999815	0.140071	0.99468	-0.0688638	0.97748	0.353521	0.22296	0.283247	0.230079	-0.19264	0.62895	0.108112	0.947261	0.060343	0.986248	-0.172211	0.885633	0.118698	0.870459	-0.0405576	0.941061	-0.0297309	0.974375
838001841	Carbohydrates and Related	Glucosamine	-0.156902	0.98371	0.0585805	0.99468	-0.141824	0.97748	0.0987645	0.81614	0.118713	0.777832	-0.231543	0.708417	-0.144035	0.934924	-0.12124	0.9853	-0.153056	0.954774	-0.0882691	0.92085	-0.178066	0.801878	-0.0205704	0.974375
858000040	Carbohydrates and Related	myo-Inositol-2-phosphate	0.038145	0.999815	0.194075	0.99468	0.0958699	0.97748	0.0750893	0.73675	0.0947115	0.613017	0.206998	0.488657	0.179952	0.734107	0.213536	0.9853	0.067919	0.966935	0.260818	0.58079	-0.176097	0.506784	0.220979	0.652958
868000049	Carbohydrates and Related	N-Acetylglucosamine	0.0316144	0.999815	0.0667919	0.99468	-0.0150563	0.97748	-0.196698	0.156538	-0.157219	0.159536	-0.0297772	0.911765	-0.0597138	0.929865	0.0208267	0.986248	-0.000886637	0.992993	-0.180078	0.411492	-0.242559	0.110007	0.0773168	0.901141
878000008	Carbohydrates and Related	Sorbitol	0.0528754	0.98371	0.0720847	0.99468	0.0691086	0.97748	0.316034	0.0677353	-0.0524156	0.800755	-0.166259	0.583482	0.385816	0.446347	0.10451	0.9853	-0.217907	0.831999	-0.0133643	0.958605	-0.237372	0.354349	0.0145821	0.974375
878000027	Carbohydrates and Related	Hexoses	0.000753016	0.999815	0.05647	0.99468	0.0854997	0.97748	-0.0521033	0.57095	-0.0540078	0.501475	-0.0496845	0.639867	-0.00881739	0.98077	0.0326695	0.9853	0.0157092	0.968802	-0.00946675	0.950465	-0.113826	0.394425	0.0136253	0.974375
878000059	Carboxylic Acids	Hippuric acid	-0.0173036	0.999815	-0.0154211	0.99468	-0.00772504	0.97748	0.323882	0.000691098	0.299892	3.91694e-05	0.0704315	0.620723	0.13476	0.512667	0.0283048	0.9853	0.0137571	0.968802	0.159271	0.326061	0.0156974	0.915398	0.0499282	0.952102
848000153	Ceramides	Cer(d18:1/16:0)	0.292721	0.870185	0.109988	0.99468	-0.154498	0.97748	1.16709	1.55323e-05	1.47579	5.85051e-07	-0.246498	0.480034	0.0342813	0.963424	0.188039	0.9853	-0.434531	0.421694	0.557721	0.0753114	0.364909	0.298495	-0.0807365	0.954886
848000155	Ceramides	Cer(d18:1/18:0)	0.207649	0.903018	-0.0141271	0.99468	-0.479016	0.706516	1.18424	3.88733e-06	1.84332	2.24489e-07	-0.256332	0.475515	0.141588	0.805334	-0.157452	0.9853	-0.603681	0.634077	0.177605	0.641011	0.200861	0.641146	-0.572116	0.329023
848000156	Ceramides	Cer(d18:1/20:0)	0.151924	0.903018	0.283745	0.99468	-0.113733	0.97748	0.97801	5.80825e-05	1.28913	0.000122423	0.0593145	0.932686	-0.0813551	0.940487	0.142733	0.9853	-0.566602	0.634077	0.166096	0.715667	-0.246036	0.566902	-0.380265	0.686218
848000158	Ceramides	Cer(d18:2/22:0)	-0.0604868	0.999815	0.0957528	0.99468	-0.0416422	0.97748	0.582624	0.000459342	1.02623	5.69381e-05	0.154264	0.770366	-0.0406509	0.963424	-0.0652845	0.9853	-0.374265	0.722087	0.0244465	0.950465	0.0290809	0.945278	0.11999	0.952102
848000161	Ceramides	Cer(d18:1/22:0)	0.130537	0.948606	-0.0869505	0.99468	-0.166082	0.97748	0.748121	0.000216385	0.753389	0.00100374	0.200493	0.463418	-0.0311505	0.963424	-0.19356	0.9853	-0.529484	0.421694	0.201135	0.640195	-0.283171	0.380893	-0.313348	0.443776
848000162	Ceramides	Cer(d18:2/23:0)	0.0570387	0.98371	-0.0371959	0.99468	-0.0531563	0.97748	0.781299	5.00518e-06	0.597852	0.0140053	0.0716745	0.847538	0.1317	0.701635	-0.209787	0.9853	-0.508434	0.421694	0.146777	0.588627	-0.0443247	0.941061	-0.17119	0.802577
848000163	Ceramides	Cer(d18:1/23:0)	0.0400928	0.999815	-0.067001	0.99468	-0.185871	0.97748	0.610575	0.000371011	0.698492	0.00053511	0.223016	0.300271	-0.17142	0.792803	-0.108951	0.9853	-0.559539	0.384768	0.0613956	0.876655	-0.267709	0.260808	-0.258473	0.6062
848000164	Ceramides	Cer(d17:1/24:0)	-0.0664107	0.98371	-0.103588	0.99468	0.0934673	0.97748	0.176123	0.218608	0.445454	0.00914532	0.260628	0.248631	-0.170107	0.616918	-0.00729392	0.990464	-0.301569	0.634077	0.064157	0.870459	0.108191	0.7671	-0.0891358	0.901141
848000166	Ceramides	Cer(d18:2/24:1)	0.222845	0.892891	-0.195433	0.99468	-0.068398	0.97748	0.378145	0.0357022	0.454445	0.0471717	-0.202683	0.4423	0.00433216	0.990913	-0.0593261	0.9853	-0.387418	0.634077	0.205333	0.548218	-0.18814	0.64241	-0.15528	0.801902
848000167	Ceramides	Cer(d18:1/24:2)	0.101134	0.980472	0.045117	0.99468	-0.143613	0.97748	0.598629	0.00859724	0.620734	0.000529436	0.00318192	0.994882	0.108642	0.929865	-0.242303	0.9853	-0.491318	0.634077	0.26834	0.543055	0.281841	0.129521	-0.399689	0.6062
848000168	Ceramides	Cer(d18:2/24:0)	0.0071651	0.999815	0.0175278	0.99468	0.121657	0.97748	0.640219	6.35009e-05	0.86612	0.000124131	0.255966	0.406358	-0.0456607	0.952662	-0.132578	0.9853	-0.236682	0.706993	0.0756908	0.762779	0.0276159	0.95036	0.102632	0.853333
848000169	Ceramides	Cer(d18:1/24:1)	-0.0889755	0.98371	-0.0223369	0.99468	-0.0797859	0.97748	0.141687	0.431518	0.521637	0.00392799	0.226984	0.500644	-0.0876502	0.940487	-0.0430594	0.986248	-0.318649	0.78187	0.0345938	0.944724	0.0395112	0.928163	-0.171621	0.846134
848000170	Ceramides	Cer(d18:1/24:0)	-0.128814	0.927681	-0.0597833	0.99468	-0.0166699	0.97748	0.356714	0.0132514	0.764585	5.69381e-05	0.417871	0.093686	-0.166412	0.710269	-0.0558694	0.9853	-0.147336	0.831999	0.0279647	0.947117	0.0260193	0.941061	-0.0470087	0.971543
828000019	Cholesterol	Cholesterol, total	-0.148064	0.892891	0.069421	0.99468	0.0711078	0.97748	0.373608	0.00425732	0.617696	0.000235199	0.199047	0.185842	-0.070458	0.929865	0.100077	0.9853	-0.116023	0.831999	-0.0639904	0.8199	0.150414	0.450288	-0.132249	0.6062
848000171	Cholesterol Esters	Cholesterylester, total	0.0162268	0.999815	0.029894	0.99468	-0.0495593	0.97748	0.250861	0.138917	0.230389	0.0898021	0.136924	0.717662	0.310791	0.373225	0.074253	0.9853	0.00267541	0.992993	0.224488	0.455137	-0.046141	0.879932	0.0516277	0.971543
848000173	Cholesterol Esters	CE(16:3)	0.344831	0.777722	0.472813	0.99468	0.0448447	0.97748	0.28424	0.138917	0.839557	0.0019399	0.423919	0.226282	0.173689	0.725512	0.122878	0.9853	0.0653133	0.966935	0.402529	0.334019	0.119122	0.819465	0.0349566	0.974375
848000174	Cholesterol Esters	CE(16:2)	-0.286389	0.903018	0.451995	0.99468	0.277043	0.97748	0.283978	0.34261	0.82392	0.00607576	0.0850685	0.820466	0.163753	0.899026	-0.108277	0.9853	-0.207851	0.831999	-0.0836053	0.874391	0.317006	0.404484	0.00337084	0.988539
848000181	Cholesterol Esters	CE(20:5)	7.23107e-05	0.999815	-0.00961657	0.99468	0.0843829	0.97748	1.13123	1.54109e-05	1.22463	2.87759e-06	0.184866	0.406358	-0.0377348	0.953636	0.133099	0.9853	-0.0472474	0.949966	-0.00759695	0.971626	0.120005	0.494138	-0.0236725	0.971543
848000182	Cholesterol Esters	CE(20:4)	-0.0621875	0.948606	-0.0224935	0.99468	0.0916952	0.97748	-0.00756556	0.950382	0.0439299	0.760881	0.0694915	0.829072	-0.00860445	0.98077	0.0776395	0.9853	-0.0412158	0.966935	0.0407351	0.875382	-0.111629	0.566902	0.158478	0.765747
848000186	Cholesterol Esters	CE(22:6)	-0.129904	0.98371	0.297104	0.99468	-0.048556	0.97748	0.317764	0.265752	0.167622	0.651807	-0.264008	0.498482	0.42615	0.447839	0.139437	0.9853	-0.229744	0.831999	0.108701	0.791748	-0.564342	0.295918	-0.466237	0.379229
828000002	Complex Lipids, Fatty Acids and Related	Glycerol, lipid fraction	0.00131332	0.999815	0.0269344	0.99468	-0.0866543	0.97748	-0.71458	0.00035002	-0.397809	0.0361967	-0.0617738	0.940781	-0.357247	0.446347	0.0063516	0.990464	-0.0694775	0.966935	-0.148006	0.768012	0.3792	0.260808	-0.197562	0.846134
828000044	Complex Lipids, Fatty Acids and Related	Glycerol phosphate, lipid fraction	-0.2471	0.903018	-0.370412	0.99468	0.348974	0.97748	0.499267	0.040878	0.289484	0.415064	0.647085	0.236012	0.0502492	0.963424	-0.15345	0.9853	0.266372	0.831999	0.12126	0.84388	0.222255	0.648539	0.0222214	0.974375
828000045	Complex Lipids, Fatty Acids and Related	Galactose, lipid fraction	-0.411702	0.870185	-0.134823	0.99468	0.424161	0.706516	0.477351	0.105422	0.401935	0.0506344	0.331187	0.343548	0.030322	0.963424	-0.0562021	0.9853	0.142408	0.831999	-0.282096	0.589897	0.0763526	0.839526	0.111232	0.862687
828000086	Complex Lipids, Fatty Acids and Related	Phosphate, lipid fraction	-0.14954	0.891424	-0.107007	0.99468	0.12716	0.97748	0.0924963	0.532278	0.217375	0.0704211	0.188136	0.316013	0.0375108	0.953636	0.000282739	0.998897	0.0846707	0.831999	-0.0472049	0.870459	-0.0150858	0.958623	-0.0545006	0.952102
828000148	Complex Lipids, Fatty Acids and Related	myo-Inositol-2-phosphate, lipid fraction (myo-Inositolphospholipids)	-0.0840847	0.999815	-0.310113	0.99468	0.420422	0.97748	0.535521	0.118538	0.583329	0.19014	0.669264	0.342097	0.0723696	0.963424	-0.079234	0.986248	0.250046	0.90167	-0.113891	0.876655	0.154106	0.839526	0.0134438	0.980161
828001194	Complex Lipids, Fatty Acids and Related	myo-Inositol, lipid fraction	-0.0812284	0.91004	-0.0887075	0.99468	0.241417	0.97748	0.160396	0.0495928	0.413911	0.0100875	0.13426	0.397119	-0.0179945	0.963424	-0.03683	0.986248	-0.0702876	0.90167	-0.0491548	0.828851	0.040553	0.899991	-0.0598219	0.952102
838000038	Complex Lipids, Fatty Acids and Related	Glycerol, polar fraction	-0.347099	0.870185	-0.319452	0.99468	0.0269782	0.97748	-0.519623	0.0305434	-0.665226	0.0402487	0.0880974	0.847538	-0.142783	0.763827	-0.156053	0.9853	0.0988298	0.951833	-0.271526	0.577113	-0.161922	0.744596	0.047027	0.974375
838000053	Complex Lipids, Fatty Acids and Related	Glycerol-3-phosphate, polar fraction	-0.00305785	0.999815	0.0463707	0.99468	-0.0888491	0.97748	0.218047	0.249896	-0.025187	0.807762	0.016491	0.944641	-0.0330408	0.96333	0.0809916	0.9853	0.0740379	0.90167	-0.0975987	0.680075	0.0554438	0.819465	0.00602466	0.974375
858000002	Complex Lipids, Fatty Acids and Related	Isopentenyl pyrophosphate (IPP)	0.0645208	0.999815	-0.255883	0.99468	0.162065	0.97748	-0.0220441	0.941336	-0.447696	0.0288965	0.195554	0.488657	-0.00496701	0.997584	-0.362134	0.9853	0.0639238	0.966935	-0.132394	0.84388	-0.680148	0.0229615	0.184711	0.6062
848000090	Diglycerides	DG(18:1_18:2)	-0.192117	0.870185	0.106662	0.99468	-0.0417238	0.97748	-1.10815	0.000260802	-1.14752	0.000458378	-0.304712	0.500644	-0.293308	0.566134	0.00868151	0.990464	-0.226158	0.831999	-0.397161	0.241007	-0.368137	0.437869	-0.35533	0.572933
838000002	Energy Metabolism and Related	Pyruvate	-0.240628	0.903018	0.0850776	0.99468	0.0903076	0.97748	-0.242972	0.283614	0.189429	0.243279	-0.183018	0.499769	-0.122872	0.934924	0.264895	0.9853	-0.0288367	0.966935	0.0169926	0.961239	-0.0699753	0.839526	0.0755688	0.952335
838000007	Energy Metabolism and Related	Malate	-0.320596	0.870185	-0.0704589	0.99468	0.10611	0.97748	-0.622445	0.0101077	-0.258795	0.0661777	-0.354967	0.145168	-0.192552	0.803265	0.167228	0.9853	-0.0157566	0.974857	-0.306419	0.470017	-0.0157516	0.965917	-0.0580364	0.971543
838000012	Energy Metabolism and Related	Citrate	-0.223559	0.903018	-0.168406	0.99468	-0.103797	0.97748	-0.417411	0.0127964	-0.536673	2.14298e-07	-0.219778	0.226774	0.0359911	0.953636	-0.0985191	0.9853	-0.231355	0.668866	-0.188846	0.582984	-0.460505	0.000709387	-0.012966	0.974375
838000032	Energy Metabolism and Related	alpha-Ketoglutarate	-0.321585	0.870185	-0.23895	0.99468	0.0491006	0.97748	-0.652156	0.0104852	-0.29456	0.0784181	-0.329933	0.349038	-0.353318	0.554866	-0.0455421	0.9853	0.0535506	0.966935	-0.0978683	0.870844	0.117708	0.480481	-0.0982847	0.952102
838000034	Energy Metabolism and Related	Fructose	0.130091	0.903018	0.00211798	0.99468	-0.00694921	0.97748	0.350563	0.0272522	0.0947281	0.677587	0.00845908	0.957638	0.137382	0.373225	-0.162917	0.9853	0.136179	0.885633	0.394786	0.191017	-0.173112	0.549725	0.0874165	0.952102
838000076	Energy Metabolism and Related	Glycerate	0.196129	0.927681	0.198579	0.99468	0.0732155	0.97748	0.322717	0.257697	0.142165	0.270342	-0.107255	0.718499	0.0791638	0.953636	0.215732	0.9853	-0.160498	0.831999	0.0999551	0.875847	0.218081	0.260808	0.118141	0.93212
838000085	Energy Metabolism and Related	Lactate	0.0585499	0.992298	0.101413	0.99468	0.0879789	0.97748	0.00953963	0.96212	0.133697	0.486263	-0.0814137	0.77406	0.200502	0.568407	0.189874	0.9853	0.0249786	0.968802	0.00933912	0.965778	-0.0282345	0.928163	0.0561746	0.971543
838000154	Energy Metabolism and Related	Glucose-1-phosphate	0.224858	0.903018	-0.114151	0.99468	-0.0236018	0.97748	-0.0666632	0.776767	0.059398	0.755446	-0.0411037	0.940781	0.131173	0.934924	-0.0728985	0.9853	-0.103081	0.925853	0.151585	0.759691	-0.241122	0.298495	-0.14471	0.853333
838000393	Energy Metabolism and Related	3-Hydroxybutyrate	-0.244659	0.903018	-0.235141	0.99468	0.0793425	0.97748	-1.01724	0.00049955	-1.08331	6.31042e-08	0.224864	0.51594	-0.268936	0.562317	-0.150931	0.9853	0.0964509	0.949966	-0.65112	0.0447269	-0.721394	0.0375768	0.293084	0.542486
838001741	Energy Metabolism and Related	3-Phosphoglycerate (3-PGA)	0.205218	0.980472	ND	ND	-0.260501	0.97748	0.482169	0.429595	ND	ND	-0.516628	0.149568	0.13798	0.934924	0.274777	0.9853	-0.360267	0.78187	ND	ND	0.30887	0.548477	ND	ND
838001832	Energy Metabolism and Related	2-Hydroxybutyrate	-0.347804	0.870185	-0.357165	0.99468	-0.219971	0.97748	-0.597584	0.00638574	-1.21425	3.59725e-05	-0.0655821	0.890094	0.169104	0.66554	-0.144822	0.9853	-0.319471	0.78187	-0.200748	0.668403	-0.813377	0.0375768	0.0411672	0.974375
838002397	Energy Metabolism and Related	Isocitrate	-0.122966	0.98371	-0.068581	0.99468	0.0426496	0.97748	-0.30073	0.289438	-0.460816	0.00315494	-0.0831348	0.81541	0.292177	0.568407	0.0709701	0.9853	-0.0897065	0.949966	-0.208942	0.665319	-0.160415	0.435752	0.078274	0.971124
858000023	Energy Metabolism and Related	Fructose-6-phosphate	0.0203863	0.999815	-0.0461424	0.99468	-0.0457069	0.97748	0.629464	0.152205	-0.0471182	0.862634	-0.526381	0.319346	0.127737	0.952662	-0.247801	0.9853	0.0492555	0.968802	-0.148404	0.870459	0.210067	0.681705	0.205994	0.901141
858000026	Energy Metabolism and Related	Succinate	0.670983	0.870185	0.295039	0.99468	0.863781	0.97748	0.657667	0.178582	0.581868	0.234081	0.193273	0.759118	0.737188	0.538866	0.226244	0.9853	0.668332	0.78187	0.433732	0.668403	0.196344	0.819465	-0.0287018	0.974375
878000001	Energy Metabolism and Related	Glycerol-3-phosphate	0.0286324	0.999815	0.117518	0.99468	0.0126874	0.97748	0.269581	0.40767	-0.401088	0.0157155	-0.0214394	0.944641	-0.0702494	0.951783	0.0619661	0.9853	0.192414	0.831999	-0.155368	0.716553	-0.0801339	0.79547	0.221933	0.765747
878000031	Energy Metabolism and Related	Ribulose-5-phosphate	-0.000132827	0.999815	0.0089409	0.99468	0.0734383	0.97748	0.567443	0.442499	-0.681967	0.0914791	-0.763522	0.226282	0.0280246	0.990018	0.0189903	0.990464	-0.0934102	0.966935	-0.843533	0.393092	-0.0253285	0.97085	-0.530426	0.731967
828000003	Fatty Acids	Palmitic acid (C16:0)	-0.00440383	0.999815	-0.0646765	0.99468	-0.0252246	0.97748	-0.430945	0.00220133	-0.164527	0.27907	0.124344	0.770366	-0.279373	0.423068	-0.0413262	0.986248	-0.0564674	0.966935	-0.123739	0.730809	0.187952	0.466866	-0.14223	0.901141
828000004	Fatty Acids	Linoleic acid (C18:cis[9,12]2)	-0.118792	0.903018	-0.0322589	0.99468	0.049813	0.97748	-0.28438	0.0346113	0.0153028	0.934746	0.173012	0.597794	-0.214315	0.512667	-0.0488853	0.9853	0.0453043	0.966935	-0.0234892	0.950465	0.451053	0.0769306	-0.0378249	0.971543
828000005	Fatty Acids	Linolenic acid (C18:cis[9,12,15]3)	-0.00897885	0.999815	-0.143958	0.99468	0.0138393	0.97748	-0.595819	2.51591e-05	-0.424801	0.00813324	0.119676	0.771355	-0.225899	0.512667	-0.108906	0.9853	-0.0514788	0.966935	-0.274825	0.435787	0.216776	0.394585	-0.0124739	0.974375
828000006	Fatty Acids	Oleic acid (C18:cis[9]1)	-0.0217224	0.999815	-0.1129	0.99468	-0.0450344	0.97748	-0.478011	0.000804545	-0.290018	0.10557	0.132383	0.781078	-0.244191	0.453199	-0.0987114	0.9853	-0.0723401	0.966935	-0.0851804	0.798256	0.417	0.148917	-0.101985	0.952102
828000007	Fatty Acids	Stearic acid (C18:0)	-0.112004	0.870185	-0.0857364	0.99468	0.125365	0.97748	0.0254711	0.814142	0.0339607	0.785535	0.160669	0.193027	-0.0196392	0.963424	-0.0169587	0.986248	-0.0714891	0.831999	-0.074029	0.759691	-0.00293652	0.988568	-0.0695232	0.778701
828000009	Fatty Acids	Octadecanol	0.0262139	0.999815	-0.126993	0.99468	0.0905414	0.97748	0.176027	0.232167	-0.18434	0.0945278	-0.133786	0.570522	0.341142	0.373225	-0.156721	0.9853	-0.166455	0.798853	0.13535	0.643551	-0.215101	0.31852	0.0262576	0.974375
828000011	Fatty Acids	Arachidonic acid	-0.0949851	0.923151	-0.0279703	0.99468	0.120997	0.97748	-0.0982809	0.470981	0.0718817	0.665084	0.184913	0.241437	-0.169879	0.555003	0.0725691	0.9853	-0.05518	0.90167	-0.15632	0.470017	-0.0552414	0.839526	-0.127671	0.686218
828000012	Fatty Acids	Eicosapentaenoic acid	0.240367	0.903018	0.212498	0.99468	-1.58877	0.97748	0.241802	0.214814	-1.60233	0.179528	-1.16017	0.639867	1.77164	0.550099	1.73357	0.9853	-1.6222	0.831999	0.0330278	0.950465	-1.96556	0.2577	-0.604892	0.962035
828000015	Fatty Acids	Docosahexaenoic acid (C22:cis[4,7,10,13,16,19]6)	-0.0612657	0.98371	0.0543501	0.99468	0.0656437	0.97748	-0.403532	0.00492168	-0.163976	0.415808	0.154373	0.639601	-0.214427	0.554315	0.0581571	0.9853	0.0270517	0.968802	-0.234032	0.470017	0.0435074	0.915398	-0.303109	0.366662
828000026	Fatty Acids	Hexadecenoic acid (C16:trans[9]1)	0.00735964	0.999815	-0.0922873	0.99468	-0.155792	0.97748	-0.066715	0.800199	0.0123563	0.975182	0.165272	0.820466	-0.473985	0.373225	-0.215528	0.9853	-0.331865	0.831999	-0.209665	0.668403	0.239308	0.597278	-0.0921134	0.971543
828000052	Fatty Acids	Lignoceric acid (C24:0)	-0.0977098	0.903018	-0.140888	0.99468	0.0710884	0.97748	0.588593	7.13885e-06	0.598482	0.000245971	0.141062	0.397119	-0.0167563	0.963424	-0.00480399	0.990464	-0.190162	0.668866	0.177344	0.257578	0.001876	0.994827	-0.249754	0.362109
828000056	Fatty Acids	Hexadecanol	-0.0566247	0.999815	-0.158628	0.99468	0.286884	0.97748	0.285775	0.240278	0.134464	0.573608	0.0981948	0.860811	0.246938	0.674335	0.0292229	0.986248	-0.167672	0.843504	0.0862777	0.885165	-0.122574	0.819465	0.0951739	0.971543
828000063	Fatty Acids	Dodecanol	0.176358	0.98371	-0.286321	0.99468	-0.0522898	0.97748	-0.00923357	0.98798	-0.343447	0.0662434	-0.275103	0.475515	0.493048	0.554315	-0.0675254	0.986248	-0.217516	0.831999	0.183634	0.818393	-0.118293	0.819465	-0.0205642	0.974375
828000068	Fatty Acids	Heptadecanoic acid (C17:0)	-0.166511	0.870185	0.0239811	0.99468	0.0777168	0.97748	-0.282737	0.010865	-0.109561	0.409442	0.331402	0.136587	-0.124803	0.535146	-0.0150689	0.986248	0.052638	0.966935	-0.0755274	0.737711	0.174459	0.354349	0.0292094	0.973546
828000069	Fatty Acids	Eicosanoic acid (C20:0)	0.0495277	0.992298	-0.173118	0.99468	-0.0449797	0.97748	0.0894306	0.503296	0.00512215	0.979081	0.289643	0.309577	0.0939677	0.934924	0.00325314	0.990464	-0.0862105	0.936062	-0.159511	0.601957	-0.140408	0.583442	-0.122653	0.846134
828000070	Fatty Acids	Eicoasenoic acid (C20:cis[11]1)	-0.686068	0.903018	-1.13138	0.99468	0.117662	0.97748	-0.866956	0.240278	-1.29717	0.0646427	1.12776	0.22713	-1.01338	0.453199	-0.873482	0.9853	0.0994155	0.966935	0.104412	0.957265	-0.712364	0.526277	-0.326089	0.846134
828000072	Fatty Acids	Tricosanoic acid (C23:0)	-0.0237316	0.999815	-0.180742	0.99468	0.103336	0.97748	0.637323	9.84193e-05	0.475993	0.000220092	0.195437	0.185842	-0.0347055	0.963424	-0.138898	0.9853	-0.164429	0.78187	0.0494715	0.875847	-0.330361	0.074899	-0.252271	0.438672
828000105	Fatty Acids	Myristic acid (C14:0)	0.0125591	0.999815	-0.0738579	0.99468	-0.120421	0.97748	-0.261606	0.163579	0.11645	0.563282	0.22956	0.620723	-0.28215	0.550099	0.0504251	0.986248	-0.232282	0.831999	-0.101304	0.84388	0.360629	0.298495	-0.331398	0.639813
828000152	Fatty Acids	Behenic acid (C22:0)	-0.111525	0.892891	-0.0685625	0.99468	0.0213995	0.97748	0.594941	0.000156931	0.63719	0.000230036	0.164213	0.440329	-0.0127075	0.982191	-0.0459245	0.9853	-0.198639	0.78187	0.0484111	0.870459	-0.203154	0.352146	-0.159914	0.64863
828000159	Fatty Acids	Nervonic acid (C24:cis[15]1)	-0.070089	0.977786	-0.147867	0.99468	0.126222	0.97748	0.46636	0.00211491	0.548662	0.00582513	0.111653	0.658163	0.0506707	0.953636	0.0477496	0.986248	-0.105049	0.90167	0.122024	0.706648	-0.0149786	0.97085	-0.23426	0.652958
828000176	Fatty Acids	Hentriacontane	-0.155002	0.870185	0.0725811	0.99468	0.0873417	0.97748	0.359602	0.00233015	0.639115	0.000221037	0.204473	0.241437	-0.00621311	0.98872	0.153302	0.9853	-0.0482667	0.951293	0.00276962	0.985478	0.248249	0.194112	-0.0372652	0.971543
828000470	Fatty Acids	Isopalmitic acid (C16:0)	-0.12005	0.977786	0.0768522	0.99468	0.134908	0.97748	-0.0854623	0.610336	0.263561	0.299121	0.478788	0.134726	-0.41461	0.446347	0.303279	0.9853	0.408022	0.421694	0.167961	0.683357	0.674973	0.0349603	0.179665	0.799581
828000472	Fatty Acids	Palmitoleic acid (C16:cis[9]1)	0.0963762	0.98371	-0.144077	0.99468	-0.321248	0.97748	0.0349651	0.894991	0.0469517	0.878296	0.130989	0.860375	-0.384976	0.373225	-0.0323395	0.990464	-0.407119	0.831999	-0.290323	0.485299	0.259051	0.591435	-0.156129	0.952102
828000474	Fatty Acids	14-Methylhexadecanoic acid	-0.142563	0.903018	-0.153255	0.99468	0.0119072	0.97748	-0.0934718	0.674633	-0.182404	0.379023	-0.0999867	0.729911	-0.0892547	0.940487	-0.271176	0.9853	0.0623065	0.966935	-0.0932046	0.844883	-0.0580529	0.899991	-0.0793948	0.952102
828000477	Fatty Acids	gamma-Linolenic acid (C18:cis[6,9,12]3)	0.32303	0.870185	0.240509	0.99468	-0.0243557	0.97748	0.443466	0.0331846	1.21298	9.38815e-05	0.660581	0.134726	-0.223993	0.627442	0.174547	0.9853	-0.0595944	0.966935	0.112335	0.849576	0.59234	0.112396	-0.0197453	0.974375
828000478	Fatty Acids	16-Methylheptadecanoic acid	-0.083724	0.98371	0.186705	0.99468	0.122047	0.97748	-0.128244	0.530435	0.00218831	0.98731	0.311838	0.263608	-0.289677	0.522246	0.0407642	0.986248	0.32004	0.634077	0.000770644	0.996156	0.58719	0.0349603	0.0676078	0.971543
828000479	Fatty Acids	17-Methyloctadecanoic acid	-0.183329	0.870185	-0.0319997	0.99468	0.12674	0.97748	-0.131867	0.546452	-0.228902	0.214489	0.236951	0.321887	-0.0355147	0.963424	0.129881	0.9853	0.163523	0.831999	0.00728484	0.971626	0.396291	0.129521	-0.054021	0.96833
828000482	Fatty Acids	dihomo-gamma-Linolenic acid (C20:cis[8,11,14]3)	0.170691	0.903018	-0.0205714	0.99468	0.119757	0.97748	0.909609	3.88733e-06	0.968513	1.72355e-05	0.20547	0.325632	0.0444416	0.953636	0.0632781	0.9853	0.0812378	0.885633	0.0859995	0.791072	0.373486	0.0642951	-0.0449204	0.971543
828000483	Fatty Acids	Eicosadienoic acid (20:2)	-0.21039	0.870185	-0.113648	0.99468	0.175636	0.97748	-0.187928	0.0934427	-0.0191067	0.907703	0.155929	0.547047	-0.0675711	0.923991	-0.0750731	0.9853	0.205047	0.78187	-0.0643163	0.782992	0.358495	0.089829	0.115576	0.846134
828000485	Fatty Acids	Eicosaenoic acid (C20:1)	-0.507493	0.870185	-0.415392	0.99468	-0.0410055	0.97748	-0.63159	0.0316715	-0.695253	0.0144258	0.581607	0.204851	-0.358537	0.627442	-0.119889	0.9853	-0.0228748	0.974857	-0.0596513	0.944724	0.109533	0.848284	-0.0157872	0.974375
828000490	Fatty Acids	Docosapentaenoic acid (C22:cis[4,7,10,13,16]5)	-0.162879	0.903018	-0.0282633	0.99468	-0.165696	0.97748	-0.582468	0.000857958	-0.302324	0.24365	-0.0502738	0.944641	-0.595889	0.373225	-0.0361187	0.986248	-0.193606	0.833045	-0.470916	0.213354	-0.0349412	0.95036	-0.474299	0.606069
828000493	Fatty Acids	Docosapentaenoic acid (C22:cis[7,10,13,16,19]5)	0.103009	0.927681	0.133111	0.99468	0.120386	0.97748	-0.194769	0.240278	0.311144	0.0276222	0.18118	0.630286	-0.237221	0.546182	0.046675	0.9853	0.0107721	0.992993	-0.0903138	0.798593	0.239906	0.215383	-0.208634	0.845415
828000830	Fatty Acids	Elaidic acid (C18:trans[9]1)	-0.0418058	0.999815	-0.131595	0.99468	-0.0243593	0.97748	-0.30408	0.0349573	-0.259784	0.127982	0.246248	0.525375	-0.2366	0.538866	-0.0868822	0.9853	0.0642554	0.966935	-0.0510502	0.875847	0.430492	0.0769306	-0.0492487	0.971543
828001705	Fatty Acids	Docosatetraenoic acid (C22:cis[7,10,13,16]4)	-0.112589	0.98371	0.504958	0.99468	0.824071	0.97748	-1.13819	0.000865053	-0.291294	0.501475	0.823499	0.292212	-0.283548	0.627442	0.373714	0.9853	0.851102	0.634077	-0.733001	0.213354	-0.016063	0.988217	-0.0149795	0.980736
78000002	Hormones and Related	Homovanillic acid (HVA)	0.0351977	0.999815	-0.255771	0.99468	0.071143	0.97748	0.419012	0.00337571	0.0249374	0.907703	0.073093	0.791488	0.0888653	0.848858	-0.335326	0.9853	0.233788	0.78187	0.208071	0.25093	-0.308838	0.260808	-0.0245284	0.974375
78000006	Hormones and Related	3,4-Dihydroxyphenylacetic acid (DOPAC)	-0.124396	0.927681	-0.640203	0.99468	0.0767198	0.97748	0.310804	0.307031	-0.400657	0.168875	0.0352925	0.944641	0.263021	0.66554	-0.579576	0.9853	0.172932	0.862892	0.343317	0.567433	-0.249885	0.566902	0.0505064	0.971543
78000008	Hormones and Related	3,4-Dihydroxyphenylglycol (DOPEG)	-0.159857	0.903018	-0.094882	0.99468	0.154967	0.97748	0.109291	0.653284	0.303825	0.02691	0.094809	0.757271	-0.107512	0.880714	0.00853322	0.990464	0.146707	0.798853	-0.0440311	0.92085	-0.0100085	0.967507	-0.0115461	0.974375
78000012	Hormones and Related	Normetanephrine	-0.0501411	0.992298	0.0215938	0.99468	0.0244319	0.97748	0.587884	0.000432839	0.748835	3.59725e-05	0.112855	0.683719	0.087591	0.934924	0.0252239	0.986248	-0.0750433	0.931044	-0.212062	0.470017	-0.120066	0.566902	-0.161896	0.765747
78000014	Hormones and Related	Metanephrine	0.0407836	0.999815	0.00266284	0.99468	0.0763015	0.97748	0.556146	0.00281982	0.416568	0.00878499	0.202715	0.352471	0.143416	0.59217	0.0343916	0.986248	0.0985079	0.862892	0.0591035	0.84388	-0.156557	0.501863	0.058663	0.952102
78000018	Hormones and Related	Noradrenaline (Norepinephrine)	-0.211478	0.903018	-0.154443	0.99468	-0.0117162	0.987223	0.101205	0.597127	0.0892696	0.643066	-0.0256036	0.944641	-0.283798	0.554315	-0.0148918	0.990464	0.0297744	0.968802	-0.210889	0.641724	-0.00169247	0.996075	0.0873524	0.952335
78000022	Hormones and Related	Adrenaline (Epinephrine)	-0.395335	0.927681	-0.321423	0.99468	0.159268	0.97748	0.615552	0.352947	0.415835	0.42832	0.63195	0.344069	-0.309161	0.934924	-0.492445	0.9853	0.377779	0.831999	-0.320135	0.77705	-0.168539	0.839526	0.869816	0.362109
78000024	Hormones and Related	3,4-Dihydroxyphenylalanine (DOPA)	0.0447395	0.999815	0.0986208	0.99468	0.167309	0.97748	-0.042452	0.876703	-0.0587389	0.770967	-0.0111892	0.964003	0.129194	0.880714	0.100537	0.9853	0.0210609	0.974857	-0.0517805	0.911784	0.0306648	0.941061	0.0716441	0.962035
78000029	Hormones and Related	3-Methoxytyrosine	0.1093	0.903018	-0.0504815	0.99468	0.000517994	0.997992	-0.0543408	0.633721	-0.107402	0.374832	0.274179	0.107548	0.113707	0.66554	0.0148805	0.986248	0.0908874	0.831999	0.13483	0.577113	-0.106791	0.48053	0.219222	0.587449
78000033	Hormones and Related	4-Hydroxy-3-methoxyphenylglycol (HMPG)	-0.0564498	0.977786	0.0202444	0.99468	0.0639016	0.97748	0.473043	0.000357243	0.678708	6.21001e-06	-0.00461735	0.980821	0.0926181	0.848858	-0.0357452	0.9853	0.0226305	0.966935	0.00420031	0.975681	-0.133598	0.492159	-0.124887	0.686218
538000001	Hormones and Related	Androstenedione	0.267381	0.948606	-0.213879	0.99468	-0.539411	0.97748	0.0402788	0.921581	-0.00734402	0.985209	-0.275549	0.789215	0.612738	0.550099	-0.148921	0.9853	-0.297498	0.90167	-0.121149	0.882683	-0.448893	0.426815	-0.447659	0.846134
538000005	Hormones and Related	Testosterone	0.189546	0.98371	-0.163238	0.99468	-0.416061	0.97748	-0.10174	0.868856	0.378993	0.409442	-0.0394128	0.964003	0.29897	0.925815	-0.344717	0.9853	-0.145489	0.966935	-0.29233	0.759691	-0.89111	0.0826367	-0.0552134	0.974375
538000010	Hormones and Related	21-Hydroxyprogesterone (11-Deoxycorticosterone)	-0.237933	0.977786	0.757856	0.99468	0.292477	0.97748	0.194069	0.64692	1.19673	0.00448417	-0.327484	0.770366	-0.343219	0.747189	0.214583	0.9853	-0.346539	0.872002	-0.495657	0.58079	1.06901	0.0642951	-0.217706	0.952102
538000012	Hormones and Related	18-Hydroxy-11-deoxycorticosterone	-0.266968	0.892891	0.238597	0.99468	0.103523	0.97748	-0.498869	0.0214059	-0.192793	0.573608	-0.353537	0.389586	-0.238782	0.62565	-0.017081	0.990464	-0.197989	0.831999	-0.239873	0.588627	0.274639	0.610529	-0.148381	0.901141
538000017	Hormones and Related	Corticosterone	-0.303326	0.870185	-0.103804	0.99468	0.0833257	0.97748	-0.733555	0.000276083	-0.649859	0.00441717	-0.499084	0.254693	-0.100814	0.918284	-0.275279	0.9853	-0.0550118	0.966935	-0.133384	0.665319	0.142237	0.583442	-0.0890719	0.954886
538000019	Hormones and Related	Cortisol	-0.85147	0.903018	0.814145	0.99468	-0.027801	0.987223	-2.71705	0.000172109	-0.731381	0.199831	-0.15356	0.944641	-0.459515	0.929865	0.495756	0.9853	0.677043	0.862892	-1.32036	0.20093	0.98127	0.239913	0.351475	0.952102
538000027	Hormones and Related	17-alpha-Hydroxyprogesterone	0.410713	0.903018	-0.0105347	0.99468	-0.364607	0.97748	0.145117	0.790078	0.447569	0.280155	-0.248751	0.770366	0.297246	0.805334	-0.148322	0.9853	-0.254701	0.885633	-0.406133	0.384039	-0.0857404	0.915398	-0.116772	0.971543
538000037	Hormones and Related	17-Hydroxypregnenolone	-0.0133708	0.999815	-0.0123941	0.99468	-0.100246	0.97748	0.396312	0.0011821	0.363284	0.00179605	-0.0326567	0.911441	0.186026	0.373225	-0.0156284	0.986248	-0.0368596	0.966935	-0.0240489	0.885165	-0.010416	0.967507	-0.0873321	0.93212
538000045	Hormones and Related	Progesterone	-0.141612	0.992298	0.440852	0.99468	0.27479	0.97748	0.124591	0.8077	0.934771	0.0213809	-0.189303	0.860811	-0.26431	0.848858	0.224152	0.9853	-0.0103496	0.992993	-0.380364	0.680075	1.59026	0.0101562	-0.339567	0.846134
538000048	Hormones and Related	Pregnenolone	0.0641725	0.999815	0.125792	0.99468	0.029094	0.97748	0.478728	0.178582	0.629783	0.00272668	-0.0378521	0.944641	0.0891807	0.953636	0.137813	0.9853	-0.0391903	0.974857	-0.378442	0.514332	0.744564	0.0769306	-0.352634	0.691636
848000008	Hormones and Related	11-Deoxycortisol	-0.265509	0.892891	0.137588	0.99468	0.132886	0.97748	-0.428491	0.0648269	-0.296652	0.21291	-0.37043	0.406358	-0.202088	0.747189	-0.0601763	0.986248	-0.176859	0.862892	-0.203196	0.665319	0.321258	0.436879	-0.0890817	0.971124
868000037	Hormones and Related	5-Hydroxy-3-indoleacetic acid (5-HIAA)	0.0946031	0.98371	0.121635	0.99468	0.19162	0.97748	0.539298	0.0303168	0.359842	0.240797	-0.241383	0.531059	0.279393	0.550099	0.202131	0.9853	-0.355849	0.831999	0.216663	0.665319	0.000613658	0.997994	-0.285028	0.6062
868000042	Hormones and Related	N,N-Dimethylarginine (ADMA)	-0.00381478	0.999815	0.0440457	0.99468	-0.0881194	0.97748	-0.0423737	0.699326	-0.37628	0.000395035	-0.0852289	0.658163	0.0488643	0.940487	-0.0811575	0.9853	0.0314177	0.966935	-0.180358	0.213354	-0.355824	0.012921	0.110359	0.765747
868000068	Hormones and Related	Adenosine monophosphate, cyclic (cAMP)	0.0667748	0.999815	0.110791	0.99468	0.155419	0.97748	0.50956	0.196774	0.167926	0.21024	-0.392994	0.145168	0.512352	0.555003	0.0936976	0.9853	-0.0279256	0.968802	0.45121	0.435787	0.0125879	0.967507	0.00208633	0.988539
868000070	Hormones and Related	Guanosine monophosphate, cyclic (cGMP)	0.219907	0.98371	-0.267998	0.99468	0.103587	0.97748	-0.0866981	0.859513	-0.631311	0.0327745	0.148744	0.770366	0.777052	0.456598	-0.0220918	0.990464	-0.171841	0.90167	0.394455	0.665319	-0.652403	0.0937821	0.392427	0.443776
878000036	Hormones and Related	Thyroxine (T4)	-0.648967	0.777722	-0.890112	0.99468	-0.557327	0.97748	ND	ND	ND	ND	-0.127234	0.860811	-0.151771	0.934924	0.017855	0.990464	-0.404535	0.831999	-0.585151	0.256957	-0.522021	0.385578	-0.546802	0.362109
848000062	Lysophosphatidylcholines	lysoPC a C14:0	0.11271	0.870185	0.0496416	0.99468	-0.00866139	0.97748	0.303465	0.000426997	0.380858	4.60229e-06	0.0710281	0.591425	-0.00209598	0.990913	0.00194969	0.990464	-0.0888585	0.78187	-0.124957	0.20093	0.0147682	0.915398	-0.0126374	0.974375
848000063	Lysophosphatidylcholines	lysoPC a C15:0	0.072826	0.948606	0.0867124	0.99468	-0.00263946	0.994491	0.055372	0.620595	0.209676	0.0370757	0.203354	0.248631	0.0042894	0.98872	0.0642689	0.9853	0.0965939	0.831999	0.0148849	0.950465	0.190992	0.237	0.0488962	0.952102
848000064	Lysophosphatidylcholines	lysoPC a C16:1	0.137275	0.891424	-0.0881438	0.99468	-0.0928845	0.97748	0.472996	0.00088434	0.312205	0.0307625	0.162171	0.352471	-0.146226	0.373225	-0.0977872	0.9853	-0.160625	0.634077	-0.138125	0.213354	0.0928972	0.766339	-0.0035269	0.980161
848000065	Lysophosphatidylcholines	lysoPC a C16:0	0.0263418	0.977786	0.0189616	0.99468	0.00469505	0.97748	-0.0554746	0.370101	-0.0245525	0.639277	-0.0350061	0.718499	-0.0419521	0.811926	0.0230459	0.9853	-0.0236378	0.931044	-0.0416102	0.58079	-0.0351915	0.744596	-0.0464315	0.846134
848000066	Lysophosphatidylcholines	lysoPC a C17:0	0.0270026	0.999815	0.121404	0.99468	0.0119282	0.97748	-0.0571542	0.546452	0.00240945	0.983598	0.0605623	0.723083	0.00545891	0.982191	0.0966505	0.9853	-0.00643495	0.992993	0.0760687	0.668403	0.265077	0.114118	-0.072173	0.87144
848000067	Lysophosphatidylcholines	lysoPC a C18:3	0.128652	0.870185	-0.0053547	0.99468	-0.0074762	0.97748	0.488279	0.00145364	0.741461	1.1091e-05	0.389843	0.0784833	0.0335443	0.953636	-0.00257613	0.990464	0.0144675	0.968802	-0.0460833	0.791072	0.0225753	0.945278	0.0326713	0.954886
848000068	Lysophosphatidylcholines	lysoPC a C18:2	0.0045864	0.999815	0.000247055	0.998485	0.0854671	0.97748	0.357591	0.000373919	0.362246	6.51825e-07	0.0806678	0.397119	0.0470383	0.880714	-0.0106714	0.986248	0.0587298	0.831999	0.123644	0.264789	0.257803	0.0101562	0.0462686	0.854323
848000069	Lysophosphatidylcholines	lysoPC a C18:1	0.021451	0.992298	-0.0607487	0.99468	0.0522202	0.97748	0.0641264	0.372013	0.105376	0.0203279	0.056824	0.60882	-0.105932	0.373225	-0.0319536	0.9853	0.00169389	0.992993	0.0410557	0.715667	0.263551	0.00154163	-0.0198674	0.971543
848000070	Lysophosphatidylcholines	lysoPC a C18:0	-0.0113695	0.999815	0.00164973	0.99468	-0.00859993	0.97748	0.069707	0.447167	0.0520226	0.567823	-0.00289364	0.975048	0.0314801	0.947261	0.0102853	0.986248	-0.0636645	0.862892	-0.0337882	0.865388	-0.0557917	0.744596	-0.113351	0.652958
848000071	Lysophosphatidylcholines	lysoPC a C19:0	-0.0193239	0.999815	0.176059	0.99468	0.0830684	0.97748	0.0365981	0.800199	0.1241	0.139175	0.159333	0.440329	-0.0343799	0.953636	0.108701	0.9853	-0.0119558	0.978661	-0.07241	0.782992	0.172338	0.333658	-0.0579769	0.952102
848000072	Lysophosphatidylcholines	lysoPC a C20:5	0.0596067	0.870185	-0.041665	0.99468	-0.0333479	0.97748	0.44689	1.85635e-05	0.420923	2.24489e-07	0.0576351	0.630286	0.0824037	0.453199	-0.0113716	0.986248	-0.0248503	0.966935	0.0455856	0.588086	0.0682968	0.371166	-0.0513788	0.846134
848000073	Lysophosphatidylcholines	lysoPC a C20:4	0.0210903	0.999815	-0.0333535	0.99468	-0.0175601	0.97748	-0.309956	0.0180187	-0.375681	0.000630119	0.0388053	0.839203	-0.0687002	0.918284	0.00339579	0.990464	-0.00114502	0.992993	-0.118668	0.470017	-0.00670728	0.97085	-0.160673	0.362109
848000075	Lysophosphatidylcholines	lysoPC a C20:3	0.0207036	0.999815	-0.0688617	0.99468	0.0219873	0.97748	0.946278	3.88733e-06	0.839823	1.87438e-06	-0.0184657	0.944641	-0.0270279	0.953636	0.00479321	0.990464	-0.00902636	0.976157	0.0193781	0.885165	0.256616	0.0590261	-0.0270141	0.971543
848000076	Lysophosphatidylcholines	lysoPC a C20:2	0.0253668	0.999815	-0.0156829	0.99468	0.0937373	0.97748	0.163632	0.0648269	0.118862	0.274061	-0.0744364	0.729911	0.0217661	0.963424	-0.0203477	0.986248	0.079454	0.90167	0.119994	0.556578	0.3869	0.0101562	-0.0189468	0.974375
848000077	Lysophosphatidylcholines	lysoPC a C20:1	-0.222743	0.827673	0.0446932	0.99468	0.147033	0.97748	-0.0441399	0.699326	0.170914	0.19173	0.270069	0.185842	-0.166535	0.538866	0.11821	0.9853	0.0262017	0.966935	0.0262116	0.929519	0.445559	0.0375768	0.0314175	0.971543
848000078	Lysophosphatidylcholines	lysoPC a C20:0	-0.0786172	0.977786	0.162535	0.99468	0.0235419	0.97748	0.153934	0.259167	0.251139	0.02691	0.167826	0.397119	-0.064849	0.934924	0.0294653	0.986248	-0.14062	0.831999	-0.019118	0.950465	0.185198	0.364323	-0.145527	0.724642
848000079	Lysophosphatidylcholines	lysoPC a C22:6	0.0213737	0.999815	0.0667079	0.99468	-0.013547	0.97748	-0.153888	0.322456	-0.0282688	0.904748	0.0557598	0.825258	-0.115934	0.792803	0.0953341	0.9853	0.0190402	0.968802	-0.025428	0.944724	-0.0721189	0.833562	-0.385135	0.329023
848000080	Lysophosphatidylcholines	lysoPC a C22:5	0.0445727	0.999815	0.107776	0.99468	0.090245	0.97748	0.270167	0.0648269	0.522539	0.00096357	-0.0662532	0.757271	0.00024584	0.998868	0.0661739	0.9853	-0.104506	0.831999	0.0927977	0.734387	0.0834773	0.79547	-0.191021	0.686218
848000081	Lysophosphatidylcholines	lysoPC a C22:4	-0.0350364	0.999815	0.0318327	0.99468	0.0545907	0.97748	0.0340192	0.825789	0.14001	0.348873	-0.012567	0.944641	-0.043395	0.953636	0.0638844	0.9853	-0.109778	0.831999	-0.0372286	0.911784	-0.085696	0.744596	-0.382426	0.329023
848000082	Lysophosphatidylcholines	lysoPC a C22:0	-0.0438855	0.98371	0.114898	0.99468	0.0210031	0.97748	0.470609	0.000366408	0.722626	2.05516e-07	0.193203	0.301059	-0.0240768	0.963424	0.0702173	0.9853	-0.177454	0.78187	-0.0102706	0.961239	0.115736	0.436879	-0.149155	0.587449
848000083	Lysophosphatidylcholines	lysoPC a C24:1	-0.162122	0.870185	0.120196	0.99468	0.12214	0.97748	0.202043	0.0219571	0.389591	0.000214776	0.326291	0.0526574	-0.0116536	0.963424	0.130958	0.9853	-0.023878	0.966935	0.107332	0.601957	0.283532	0.0349603	0.0213778	0.971543
848000084	Lysophosphatidylcholines	lysoPC a C24:0	-0.0776179	0.927681	0.173026	0.99468	0.0957403	0.97748	0.402609	0.000123791	0.707288	6.87605e-08	0.170121	0.300271	0.00463858	0.98872	0.083299	0.9853	-0.0599534	0.949966	-0.0252867	0.911784	0.123875	0.352146	-0.00609366	0.974375
848000055	Lysophosphatidylethanolamine	lysoPE a C16:0	0.217314	0.777722	0.0219179	0.99468	-0.0560375	0.97748	0.251898	0.0297362	0.225918	0.0288965	0.00453955	0.964003	-0.030382	0.953636	-0.0804176	0.9853	-0.116991	0.78187	-0.176651	0.241007	-0.214429	0.0932028	-0.201932	0.362109
848000056	Lysophosphatidylethanolamine	lysoPE a C18:2	0.00244708	0.999815	-0.103864	0.99468	0.15888	0.97748	0.335955	0.00667766	0.51674	7.08093e-06	0.159002	0.324037	0.0938448	0.803265	0.0177303	0.986248	-0.0149476	0.968802	0.153908	0.428271	0.153499	0.385578	0.0907002	0.853333
848000057	Lysophosphatidylethanolamine	lysoPE a C18:1	0.0398093	0.98371	-0.0646766	0.99468	0.132043	0.97748	0.311327	0.0285731	0.495084	0.0012421	0.295635	0.0693199	-0.016094	0.963424	-0.0049852	0.990464	-0.0268218	0.966935	0.0444729	0.849576	0.287488	0.19444	0.0939033	0.846134
848000058	Lysophosphatidylethanolamine	lysoPE a C18:0	0.123209	0.876674	0.032058	0.99468	-0.0541475	0.97748	0.291697	0.0114051	0.309053	0.0023443	0.0684893	0.392961	0.0266023	0.953636	-0.0315872	0.9853	-0.142182	0.421694	-0.161211	0.25093	-0.0919961	0.437869	-0.18686	0.329023
848000059	Lysophosphatidylethanolamine	lysoPE a C20:4	-0.0334739	0.994218	-0.156164	0.99468	0.0322538	0.97748	-0.0922225	0.546452	-0.112911	0.321964	0.183327	0.253829	-0.0929779	0.844325	-0.0524391	0.9853	-0.135107	0.831999	-0.178659	0.327576	-0.283341	0.144426	-0.0988314	0.921881
848000060	Lysophosphatidylethanolamine	lysoPE a C22:6	0.0940375	0.958419	0.0750037	0.99468	0.0500067	0.97748	-0.334521	0.0450482	0.168364	0.379023	0.255083	0.397119	-0.184511	0.627442	0.0634114	0.9853	-0.142391	0.862892	-0.356939	0.25093	-0.287911	0.198913	-0.299654	0.587449
848000061	Lysophosphatidylethanolamine	lysoPE a C22:5	0.154506	0.927681	0.12364	0.99468	-0.170835	0.97748	0.357835	0.0559276	0.329007	0.00924454	-0.0944383	0.770366	0.215847	0.595478	-0.192806	0.9853	-0.184516	0.831999	-0.063925	0.870459	-0.300865	0.129521	-0.332716	0.463648
828000021	Miscellaneous	beta-Sitosterol, total	0.165594	0.903018	-0.158799	0.99468	0.0591765	0.97748	0.399564	0.00751148	0.548593	0.0119303	0.390911	0.135444	0.0800218	0.934924	0.121629	0.9853	0.0211448	0.974857	-0.28192	0.256957	-0.200005	0.461023	-0.281774	0.58091
828000053	Miscellaneous	Campesterol, total	0.0664204	0.98371	-0.141919	0.99468	0.144303	0.97748	0.497864	0.00135875	0.730519	0.000245971	0.468989	0.0693199	-0.0548217	0.952662	-0.0161465	0.990464	0.0557239	0.966935	-0.275259	0.276541	-0.226124	0.354385	-0.273077	0.366662
828000078	Miscellaneous	Ethanolamine	-0.0345997	0.980472	0.00226254	0.99468	0.00512771	0.97748	-0.000510318	0.994511	0.142826	0.0560094	0.136933	0.392961	-0.0328446	0.934924	0.0487936	0.9853	-0.0414346	0.966935	-0.0586701	0.665319	0.0432193	0.828149	-0.0933244	0.765747
838000051	Miscellaneous	Phosphate (inorganic and from organic phosphates)	0.0288315	0.999815	0.0574917	0.99468	-0.0464886	0.97748	0.0217723	0.860585	-0.258594	0.000383745	0.0638749	0.623423	0.110696	0.66554	-0.0141567	0.986248	-0.00546157	0.992993	-0.312633	0.191017	-0.581866	0.000709387	0.0394389	0.954886
838000114	Miscellaneous	Glycolate	0.116081	0.98371	-0.0804644	0.99468	0.191421	0.97748	0.0584725	0.8077	-0.0671432	0.807762	0.00141058	0.997215	0.075521	0.940487	-0.145843	0.9853	0.170692	0.833045	0.193284	0.665319	-0.202866	0.633713	0.184774	0.857496
838001739	Miscellaneous	O-Phosphoethanolamine	0.149371	0.903018	-0.0868574	0.99468	0.0947774	0.97748	0.125344	0.241351	-0.189784	0.168875	0.0405593	0.911765	0.0890517	0.792803	-0.0139717	0.987426	-0.0722495	0.966935	-0.0358487	0.92931	-0.236256	0.273429	0.0422894	0.971543
858000024	Miscellaneous	Salicylic acid	0.0309469	0.98371	0.0101126	0.99468	-0.0322841	0.97748	0.305197	0.00694275	0.28046	0.0465969	-0.0588814	0.847538	0.319381	0.373225	-0.0240811	0.986248	0.0147086	0.974857	0.218831	0.402494	0.0462846	0.868092	0.00433361	0.980736
868000001	Miscellaneous	Trimethylamine-N-oxide (TMAO)	0.156013	0.903018	-0.0126627	0.99468	0.0168426	0.97748	0.296225	0.042781	0.0819122	0.489285	-0.0192346	0.944641	0.118474	0.899026	-0.0533406	0.9853	0.0983542	0.885633	0.433246	0.191017	0.00351432	0.988568	0.0512405	0.971543
868000029	Miscellaneous	Furoylglycine	-0.0132228	0.999815	0.305279	0.99468	-0.247147	0.97748	0.0543079	0.876228	0.0200115	0.977407	0.0527619	0.944641	-0.269259	0.7592	0.26453	0.9853	0.180889	0.966935	0.208505	0.849576	-0.36511	0.636064	0.220852	0.952102
868000052	Miscellaneous	Ergothioneine	0.102595	0.927681	0.121505	0.99468	0.108996	0.97748	0.259309	0.0314033	0.0175347	0.907463	0.155721	0.500644	0.0374377	0.940487	0.0326756	0.986248	-0.153028	0.831999	-0.258291	0.191017	-0.568573	0.00558321	-0.278761	0.329023
868000072	Miscellaneous	Biliverdin	0.0569818	0.999815	-0.0394144	0.99468	-0.184057	0.97748	-0.177489	0.555504	-0.531395	0.0144258	-0.2705	0.397119	0.231226	0.911114	-0.0934977	0.9853	-0.165039	0.831999	-0.550521	0.213354	-0.691593	0.00897053	-0.0403415	0.971543
878000029	Miscellaneous	trans-p-Coumaric acid	-0.0517208	0.999815	-0.460796	0.99468	-0.636105	0.97748	0.315921	0.542782	0.308275	0.431218	-0.345652	0.639601	0.745717	0.555003	0.143086	0.9853	-0.327384	0.931044	0.498629	0.706648	0.0292896	0.97085	-0.891057	0.366662
838000441	Nucleobases and Related	Cytosine	-0.117131	0.89295	0.072724	0.99468	-0.0366376	0.97748	-0.270329	0.00110055	-0.588636	8.67502e-05	-0.112385	0.591425	0.0413121	0.947261	-0.0153896	0.986248	0.0382141	0.966935	-0.23832	0.191017	-0.258373	0.245916	0.134795	0.846134
838000534	Nucleobases and Related	Uracil	-0.0852456	0.944746	0.00679808	0.99468	0.0182705	0.97748	-0.086489	0.586143	-0.571745	1.14512e-05	0.0161693	0.944641	0.0728284	0.929865	-0.106695	0.9853	0.20893	0.78187	0.0085158	0.961239	-0.377182	0.0250789	0.245295	0.329023
838000563	Nucleobases and Related	Pseudouridine	0.0380534	0.992298	0.0581254	0.99468	0.00845054	0.97748	0.0645401	0.664819	-0.0455177	0.691329	0.0168793	0.944641	0.0614625	0.918284	-0.0196237	0.986248	-0.0486988	0.90167	0.01007	0.960054	-0.197385	0.194112	0.0787062	0.923422
838000597	Nucleobases and Related	Uric acid	0.134145	0.927681	-0.0113252	0.99468	0.126744	0.97748	0.137217	0.607061	-0.294721	0.0022109	-0.20673	0.300271	0.364268	0.535146	0.0586566	0.9853	0.0346854	0.966935	-0.101609	0.683357	0.0131	0.945278	-0.0309215	0.971543
868000009	Nucleobases and Related	Thymine	-0.046763	0.992298	0.104335	0.99468	-0.0280717	0.97748	-0.49044	0.00186178	-0.648541	4.60517e-05	-0.299676	0.0526574	0.0995436	0.805334	0.0314159	0.986248	-0.204195	0.668866	0.0868186	0.689421	-0.165631	0.436879	0.149981	0.691636
868000021	Nucleobases and Related	Allantoin	-0.11448	0.903018	-0.0655776	0.99468	0.12897	0.97748	0.150189	0.218608	-0.0573927	0.655789	-0.0372825	0.911765	-0.0321453	0.947261	-0.111922	0.9853	0.0435259	0.966935	-0.0421207	0.870459	-0.340819	0.0349603	0.138834	0.846134
868000025	Nucleobases and Related	7-Methylguanine	-0.155688	0.892891	-0.00753282	0.99468	-0.145733	0.97748	-0.342144	0.00901461	-0.435682	0.00295288	-0.192188	0.390608	0.207282	0.550099	0.0808829	0.9853	-0.101889	0.90167	-0.172211	0.435787	-0.411842	0.0541654	0.0508653	0.971543
868000051	Nucleobases and Related	2'-Deoxycytidine	-0.0758932	0.903018	0.00516878	0.99468	-0.00860101	0.97748	-0.208081	0.0278857	-0.454838	3.89855e-05	-0.172919	0.107548	0.0817672	0.792803	0.0319928	0.9853	0.0180155	0.966935	-0.195981	0.213354	-0.224633	0.0349603	0.0559212	0.952102
868000056	Nucleobases and Related	Uridine	0.0143907	0.999815	0.336275	0.99468	0.0432017	0.97748	-0.39977	0.0357022	-0.439595	0.027963	0.0225642	0.944641	0.00160572	0.997584	0.169931	0.9853	-0.0671445	0.966935	-0.337074	0.241007	0.00361774	0.993188	0.0849806	0.960695
868000058	Nucleobases and Related	5-Methylcytidine	-0.0410499	0.977786	0.106447	0.99468	0.011333	0.97748	-0.160984	0.130887	-0.395016	0.000299193	-0.0387617	0.839363	0.00394117	0.98872	0.0311394	0.9853	-0.114484	0.78187	-0.147559	0.388767	-0.20038	0.238502	0.10859	0.652958
868000063	Nucleobases and Related	N-Acetylcytidine	-0.13644	0.927681	-0.114009	0.99468	-0.193995	0.97748	0.0958703	0.621394	0.416232	0.00685406	-0.173672	0.547047	-0.251508	0.538866	-0.0668862	0.9853	-0.151237	0.831999	0.0208616	0.950465	0.0881135	0.760591	0.00650889	0.974375
878000048	Nucleobases and Related	Orotic acid	-0.207726	0.870185	0.053335	0.99468	0.067293	0.97748	-0.0529594	0.756212	-0.0096348	0.9735	0.000417022	0.99754	0.0948779	0.934924	-0.0273511	0.986248	0.10127	0.90167	-0.117613	0.665319	-0.0969538	0.760591	0.137925	0.846134
848000106	Phosphatidylcholines	PC ae C32:0	-0.0663224	0.927681	0.0181494	0.99468	0.0778701	0.97748	0.217555	0.00931322	0.452051	0.000121686	0.209217	0.066674	-0.00671328	0.982191	0.0715161	0.9853	-0.0412498	0.951833	-0.0130388	0.934151	-0.140404	0.39089	-0.0840937	0.778701
848000107	Phosphatidylcholines	PC ae C34:3	0.0245218	0.999815	-0.118408	0.99468	-0.055029	0.97748	0.388415	0.000780836	0.449828	0.00146455	0.30869	0.185842	-0.0457351	0.947261	-0.0712929	0.9853	-0.174273	0.722087	0.161751	0.470017	0.360501	0.255687	0.120414	0.801902
848000108	Phosphatidylcholines	PC ae C34:2	-0.0650318	0.903018	0.0676721	0.99468	0.0615173	0.97748	0.15694	0.0357022	0.285204	9.17486e-06	0.134837	0.185842	0.0432737	0.923991	0.0316739	0.9853	0.000687762	0.992993	0.126145	0.25093	0.130628	0.219693	0.100609	0.362109
848000109	Phosphatidylcholines	PC ae C34:1	0.000522572	0.999815	-0.0316411	0.99468	0.0379929	0.97748	0.0815195	0.322456	0.223486	5.7634e-05	0.180697	0.134726	0.00388386	0.98872	-0.0336228	0.9853	-0.0420882	0.949966	0.108151	0.404013	0.0999359	0.298495	0.0499551	0.846134
848000110	Phosphatidylcholines	PC ae C34:0	0.000605005	0.999815	0.0533549	0.99468	0.0157113	0.97748	0.111149	0.167056	0.585789	2.24639e-05	0.178583	0.134726	-0.0635807	0.918284	0.118584	0.9853	-0.0951696	0.831999	-0.0723795	0.718204	-0.0213775	0.921232	-0.174964	0.329023
848000111	Phosphatidylcholines	PC ae C36:5	0.148109	0.903018	-0.197967	0.99468	-0.0801452	0.97748	0.247196	0.0600111	0.345688	0.081546	0.34626	0.22713	-0.262792	0.373225	-0.114002	0.9853	-0.158913	0.831999	-0.0078555	0.961239	0.371241	0.33121	-0.0243261	0.974375
848000112	Phosphatidylcholines	PC ae C36:4	-0.0489314	0.903018	0.00579099	0.99468	-0.00687273	0.97748	-0.245453	3.92821e-05	-0.189574	0.0077732	0.0814648	0.241437	-0.123537	0.373225	0.0203852	0.9853	-0.0287796	0.949024	-0.0799468	0.384039	-0.0293153	0.819465	-0.0262584	0.952102
848000113	Phosphatidylcholines	PC ae C36:3	-0.00430062	0.999815	-0.0743616	0.99468	0.042473	0.97748	0.199601	0.00208779	0.272328	3.59725e-05	0.193299	0.10884	0.0050183	0.983087	-0.0199815	0.9853	0.0266175	0.966935	0.167956	0.191017	0.430531	0.00410159	0.0601075	0.846134
848000114	Phosphatidylcholines	PC ae C36:2	-0.0966393	0.870185	0.0730226	0.99468	0.101226	0.97748	0.376873	0.000207629	0.53738	1.6131e-07	0.156647	0.236012	0.0520474	0.815042	0.0222613	0.9853	-0.00439757	0.992993	0.217292	0.124857	0.215248	0.0195306	0.133845	0.606069
848000115	Phosphatidylcholines	PC ae C36:1	0.0176386	0.999815	-0.0049096	0.99468	0.0818192	0.97748	0.306588	0.00105983	0.545265	1.1091e-05	0.27176	0.104171	0.0149224	0.963424	-0.0146597	0.986248	-0.0545463	0.936062	0.236302	0.20093	0.263511	0.0799626	0.0759556	0.846134
848000116	Phosphatidylcholines	PC ae C36:0	-0.0905662	0.980472	-0.130355	0.99468	-0.0741351	0.97748	0.293666	0.0851665	0.419876	0.0327745	0.0837188	0.770366	-0.0466385	0.963424	-0.0174203	0.990464	-0.238096	0.78187	-0.100608	0.807103	-0.325076	0.237	-0.328742	0.362109
848000117	Phosphatidylcholines	PC ae C38:6	-0.0822607	0.927681	0.131672	0.99468	-0.0132457	0.97748	-0.229565	0.0368474	0.0566823	0.714315	0.00826581	0.96197	-0.158618	0.538866	0.0946717	0.9853	-0.0837867	0.831999	-0.141747	0.504382	-0.0886441	0.775383	-0.225183	0.362109
848000118	Phosphatidylcholines	PC ae C38:5	-0.000608964	0.999815	-0.0657976	0.99468	0.0288032	0.97748	-0.0817068	0.16402	0.0446215	0.643066	0.0851303	0.630286	-0.155814	0.529233	-0.043801	0.9853	-0.0061829	0.992993	0.0291511	0.84388	0.348136	0.0183919	-0.0355844	0.971543
848000119	Phosphatidylcholines	PC ae C38:4	-0.114393	0.777722	-0.0229627	0.99468	0.00276463	0.97748	-0.196258	0.00132847	-0.216676	0.00115581	0.00705774	0.944641	-0.0521282	0.805334	-0.060968	0.9853	-0.0805262	0.78187	-0.127852	0.25093	-0.14886	0.151186	-0.0640091	0.691636
848000120	Phosphatidylcholines	PC ae C38:3	-0.0527916	0.98371	0.00555455	0.99468	0.0673129	0.97748	1.09153	7.68457e-08	1.05965	6.21001e-06	0.234333	0.301059	0.0770359	0.847226	-0.135395	0.9853	-0.0176123	0.968802	0.0335113	0.898562	0.130047	0.564255	-0.0140152	0.974375
848000121	Phosphatidylcholines	PC ae C40:8	-0.117179	0.927681	-0.0606145	0.99468	0.0944062	0.97748	-0.145823	0.367151	0.0324049	0.842432	0.229204	0.134726	-0.185701	0.562317	-0.0574299	0.9853	0.0148514	0.974857	-0.157649	0.601957	0.0434597	0.842362	-0.125507	0.639813
848000122	Phosphatidylcholines	PC ae C40:7	-0.113878	0.927681	0.113665	0.99468	-0.0297472	0.97748	-0.216673	0.0855628	0.0933565	0.54017	0.105099	0.718499	-0.218393	0.554315	0.160874	0.9853	-0.110832	0.931044	0.0637483	0.870459	0.523907	0.0135694	-0.231132	0.652958
848000123	Phosphatidylcholines	PC ae C40:6	-0.111173	0.903018	0.140431	0.99468	-0.067181	0.97748	-0.162435	0.252286	0.00386989	0.98052	-0.0327214	0.911765	-0.00148533	0.997584	0.055208	0.9853	-0.123655	0.831999	-0.123564	0.601957	-0.318916	0.160329	-0.225976	0.570799
848000045	Phosphatidylethanolamine	Choline plasmalogen (C18-vinyl,C20:4)	-0.191839	0.870185	0.0408879	0.99468	0.144357	0.97748	0.249135	0.0230049	0.536884	0.000583992	0.28527	0.134726	-0.0511159	0.947261	0.0819234	0.9853	-0.0301273	0.966935	0.0297988	0.934151	0.0241849	0.946977	0.0351315	0.971543
848000091	Phosphatidylethanolamine	PE ae C32:0	0.0750127	0.927681	-0.00829388	0.99468	-0.0625603	0.97748	0.132794	0.262555	0.176976	0.121447	-0.0437288	0.870578	0.033517	0.953636	-0.0436559	0.9853	-0.0337514	0.966935	-0.00272493	0.975681	-0.164162	0.277531	-0.108727	0.899846
848000092	Phosphatidylethanolamine	PE ae C34:2	0.0798645	0.980472	-0.106338	0.99468	0.00158814	0.996583	-0.0452324	0.756212	-0.0158663	0.907463	-0.0545808	0.867971	-0.0937125	0.84757	-0.15185	0.9853	0.0587697	0.966935	0.20828	0.470017	0.18235	0.671681	-0.0307313	0.974375
848000093	Phosphatidylethanolamine	PE ae C34:1	0.162981	0.903018	-0.261483	0.99468	0.0425762	0.97748	0.0892664	0.693723	0.186132	0.252735	0.121648	0.547047	-0.0337514	0.963424	-0.204437	0.9853	0.147753	0.831999	0.138304	0.665319	0.104789	0.819465	-0.0406605	0.971543
848000094	Phosphatidylethanolamine	PE ae C34:0	-0.0535704	0.929094	0.0477151	0.99468	0.0876261	0.97748	-0.00816362	0.894991	0.376045	0.0188833	0.123333	0.526101	-0.151477	0.431575	-0.0143641	0.990464	0.0278867	0.966935	-0.108159	0.25093	-0.200235	0.328843	0.0152942	0.974375
848000095	Phosphatidylethanolamine	PE ae C36:4	0.112557	0.927681	-0.025146	0.99468	-0.0411677	0.97748	-0.698275	3.88733e-06	-0.541246	0.00103719	-0.143921	0.693267	-0.307661	0.373225	-0.147983	0.9853	0.13917	0.90167	-0.190353	0.601957	-0.103523	0.819465	-0.0762797	0.971543
848000096	Phosphatidylethanolamine	PE ae C36:3	-0.0369724	0.992298	-0.129804	0.99468	0.0720047	0.97748	-0.0675782	0.463037	0.00153732	0.98731	0.0643322	0.757271	-0.0720105	0.756475	-0.0566439	0.9853	0.143624	0.831999	0.265078	0.191017	0.542286	0.0929595	0.180499	0.724642
848000097	Phosphatidylethanolamine	PE ae C36:2	0.0783952	0.927681	-0.0182907	0.99468	0.0233648	0.97748	-0.018129	0.814142	0.0788708	0.469875	0.152986	0.397119	-0.0783686	0.562317	-0.047892	0.9853	0.0935541	0.885633	0.0760529	0.683357	0.157097	0.610529	0.0342899	0.971543
848000098	Phosphatidylethanolamine	PE ae C36:1	-0.00514215	0.999815	-0.152087	0.99468	0.130609	0.97748	-0.0663695	0.673644	0.0989505	0.643683	0.248196	0.134726	-0.127753	0.66554	-0.0998705	0.9853	0.114413	0.862892	-0.0670605	0.759691	0.0540373	0.902299	0.109084	0.846134
848000099	Phosphatidylethanolamine	PE ae C36:0	0.0787119	0.98371	0.299619	0.99468	-0.21332	0.97748	0.18552	0.470981	0.327248	0.00743737	0.0932608	0.820466	-0.0832488	0.940487	-0.079873	0.9853	-0.228694	0.831999	-0.191282	0.665319	-0.0639049	0.841177	-0.14569	0.846134
848000100	Phosphatidylethanolamine	PE ae C38:6	0.246961	0.870185	0.286488	0.99468	-0.0138172	0.987223	-0.938226	2.55855e-06	-0.444655	0.0456706	0.0457039	0.944641	-0.414003	0.373225	0.0346859	0.986248	-0.0714397	0.966935	-0.182552	0.683357	-0.0693194	0.905627	-0.461464	0.6062
848000101	Phosphatidylethanolamine	PE ae C38:5	0.0202929	0.999815	0.0764	0.99468	-0.0461858	0.97748	-0.39544	0.00105983	-0.286167	0.0138234	0.00136639	0.997215	-0.278203	0.373225	-0.0632601	0.9853	0.163085	0.90167	-0.0169639	0.950465	0.513656	0.124857	0.0264927	0.974375
848000102	Phosphatidylethanolamine	PE ae C38:4	0.0813288	0.968388	-0.0467642	0.99468	-0.174087	0.97748	-0.534781	1.82092e-05	-0.499254	0.00280431	-0.214941	0.547723	-0.283556	0.373225	-0.208539	0.9853	-0.0604403	0.966935	-0.161338	0.665319	-0.0972741	0.833562	-0.282764	0.652958
848000103	Phosphatidylethanolamine	PE ae C38:3	-0.00808171	0.999815	-0.0931708	0.99468	0.0237404	0.97748	0.305841	0.00282399	0.362596	0.00268135	-0.00483144	0.980821	-0.131017	0.373225	-0.0728477	0.9853	0.0473812	0.966935	-0.0507884	0.737711	0.0793011	0.819465	0.0625636	0.954886
848000104	Phosphatidylethanolamine	PE ae C40:7	0.156991	0.903018	0.158727	0.99468	-0.0813597	0.97748	-0.791969	3.92821e-05	-0.385738	0.081546	0.297193	0.620723	-0.432217	0.373225	0.000287385	0.998897	0.0225512	0.992993	-0.0465948	0.935932	0.526245	0.258879	-0.310844	0.846134
848000105	Phosphatidylethanolamine	PE ae C40:6	0.202366	0.892891	0.134346	0.99468	-0.167757	0.97748	-0.890264	3.52281e-06	-0.554381	0.00120719	0.109121	0.870578	-0.416965	0.373225	-0.065009	0.9853	-0.201602	0.886488	-0.333567	0.470017	-0.17551	0.636064	-0.441492	0.424975
828000158	Sphingomyelins	4-Hydroxysphinganine (t18:0, Phytosphingosine), total	-0.00341387	0.999815	-0.0793846	0.99468	0.192445	0.97748	0.872328	0.000197958	1.30849	4.1321e-06	0.385913	0.14117	0.112432	0.925815	0.117074	0.9853	0.0304554	0.966935	0.27862	0.52475	0.111212	0.744596	-0.0461454	0.971543
828000489	Sphingomyelins	3-O-Methylsphingosine (d18:1)	-0.0868472	0.927681	-0.128157	0.99468	0.195782	0.97748	0.992126	4.26859e-05	1.40882	5.7634e-05	0.327999	0.226178	0.0285957	0.963424	0.0501729	0.986248	0.0431092	0.966935	0.227713	0.577113	0.1239	0.819465	-0.159241	0.846134
828000491	Sphingomyelins	threo-Sphingosine (d18:1)	-0.0380005	0.990945	-0.0552366	0.99468	0.111899	0.97748	0.811665	3.88733e-06	1.09504	1.59648e-06	0.243192	0.22713	0.0398327	0.953636	0.0766278	0.9853	-0.111365	0.852317	0.158301	0.581035	0.0734265	0.819465	-0.129862	0.844046
828000494	Sphingomyelins	5-O-Methylsphingosine (d18:1)	-0.144763	0.892891	-0.0386729	0.99468	0.165471	0.97748	0.819733	5.13993e-06	1.28117	9.52371e-06	0.258627	0.281759	-0.0135115	0.983087	0.0783779	0.9853	-0.00524709	0.992993	0.160493	0.609039	0.136542	0.756829	-0.154855	0.846134
828000495	Sphingomyelins	erythro-Sphingosine (d18:1)	-0.107971	0.903018	-0.0481009	0.99468	0.16685	0.97748	0.75692	3.2945e-06	1.07352	1.92943e-05	0.180774	0.352471	-0.00439464	0.990913	0.0601859	0.9853	-0.0739843	0.90167	0.101779	0.665319	0.0778909	0.839526	-0.141524	0.765747
848000128	Sphingomyelins	SM(d32:2)	-0.0531298	0.992298	-0.0440862	0.99468	-0.0756649	0.97748	0.93492	6.65263e-06	1.31212	2.87759e-06	-0.00581576	0.980821	-0.270138	0.373225	-0.0599836	0.9853	-0.381227	0.375517	-0.526368	0.0199139	-0.207793	0.441792	-0.236162	0.362109
848000129	Sphingomyelins	SM(d32:1)	0.0429278	0.992298	0.0239191	0.99468	-0.100265	0.97748	1.20943	9.67991e-08	1.58351	2.14298e-07	0.0764502	0.73001	-0.255447	0.456598	0.13688	0.9853	-0.300095	0.421694	-0.268017	0.172487	0.0351742	0.932851	-0.231868	0.329023
848000130	Sphingomyelins	SM(d33:1)	-0.055015	0.98371	0.158144	0.99468	0.113605	0.97748	0.614738	3.92821e-05	1.13768	9.86654e-08	0.171187	0.397119	-0.128175	0.628357	0.184435	0.9853	-0.0475385	0.954774	0.193331	0.256957	0.343663	0.112396	-0.0666531	0.93212
848000131	Sphingomyelins	SM(d34:2)	-0.08448	0.936632	0.0858721	0.99468	0.110784	0.97748	0.664295	5.13065e-05	1.06586	2.14298e-07	0.154693	0.514942	-0.175155	0.554315	0.143579	0.9853	-0.108788	0.831999	-0.0980175	0.683357	0.0969944	0.7671	-0.0294379	0.971543
848000132	Sphingomyelins	SM(d34:1)	-0.0175164	0.999815	0.0957926	0.99468	0.0592595	0.97748	0.584498	1.82092e-05	0.855921	5.70605e-08	0.0829947	0.683719	-0.0838733	0.792803	0.0783995	0.9853	-0.0866271	0.831999	0.166876	0.221204	0.129543	0.572307	-0.107486	0.78377
848000133	Sphingomyelins	SM(d34:0)	-0.0478061	0.999815	0.123984	0.99468	-0.0391589	0.97748	0.289268	0.1049	0.494884	0.00285229	0.0276371	0.944641	-0.050879	0.953636	0.246187	0.9853	0.0323846	0.968802	0.116776	0.715667	0.176132	0.610529	0.0694521	0.952102
848000134	Sphingomyelins	SM(d35:2)	-0.110595	0.91004	0.24293	0.99468	0.167927	0.97748	0.691525	0.000110072	1.29975	6.87605e-08	0.30686	0.194715	-0.125176	0.710269	0.0799314	0.9853	-0.0220607	0.968802	0.023844	0.944738	0.149858	0.477335	0.0174531	0.974375
848000135	Sphingomyelins	SM(d35:1)	-0.105614	0.903018	0.184084	0.99468	0.191851	0.97748	0.872127	7.13885e-06	1.47582	9.78437e-08	0.288962	0.263608	0.00538415	0.98872	0.157795	0.9853	-0.0358864	0.966935	0.234676	0.25093	0.318934	0.217447	-0.0159756	0.974375
848000136	Sphingomyelins	SM(d36:3)	0.00428037	0.999815	-0.0666062	0.99468	0.0457695	0.97748	0.762534	5.479e-05	1.03468	5.85051e-07	0.0132728	0.944641	-0.219174	0.546182	-0.269443	0.9853	-0.153561	0.798853	-0.318458	0.191017	-0.446058	0.0929595	-0.115295	0.846134
848000137	Sphingomyelins	SM(d36:2)	-0.0693206	0.944746	-0.116903	0.99468	0.0484931	0.97748	0.893593	6.65263e-06	1.24908	3.72541e-07	0.104868	0.674215	-0.166864	0.538866	-0.163596	0.9853	-0.175366	0.831999	-0.0915642	0.668403	-0.298582	0.298495	-0.198702	0.639813
848000138	Sphingomyelins	SM(d36:1)	-0.0909347	0.912512	0.0872753	0.99468	-0.0978775	0.97748	0.999981	3.88733e-06	1.55939	2.14298e-07	-0.0153403	0.944641	-0.102511	0.792803	0.0122703	0.990464	-0.34211	0.571517	-0.0268265	0.911784	-0.0135608	0.972946	-0.301022	0.362109
848000139	Sphingomyelins	SM(d37:1)	-0.226225	0.851985	0.0222074	0.99468	0.0375473	0.97748	0.624345	3.38815e-05	0.945739	4.58696e-07	-0.00453672	0.982358	-0.0508995	0.940487	-0.0247697	0.986248	-0.160507	0.78187	0.138798	0.582984	-0.127161	0.591569	-0.114772	0.901141
848000140	Sphingomyelins	SM(d38:2)	-0.130109	0.903018	-0.111028	0.99468	0.0405962	0.97748	0.819706	1.32905e-05	0.99624	4.60229e-06	0.0592623	0.869012	-0.0498026	0.947261	-0.11871	0.9853	-0.239312	0.722087	-0.0961456	0.716469	-0.296359	0.29307	-0.105616	0.93212
848000141	Sphingomyelins	SM(d38:1)	-0.167079	0.870185	-0.0245171	0.99468	-0.0368767	0.97748	0.655074	1.85798e-05	0.833718	1.91713e-05	0.0876207	0.737066	-0.0629866	0.934924	-0.0954776	0.9853	-0.284095	0.634077	-0.0696383	0.80552	-0.0715198	0.819465	-0.224193	0.58091
848000142	Sphingomyelins	SM(d39:1)	-0.0838264	0.927681	-0.0216879	0.99468	0.0459605	0.97748	0.580888	0.000109819	0.743904	1.08386e-05	0.138907	0.526101	-0.161897	0.66554	-0.0219516	0.986248	-0.151199	0.78187	0.0253539	0.944724	-0.12142	0.566902	-0.0960053	0.846134
848000143	Sphingomyelins	SM(d40:2)	-0.0846049	0.939296	0.111809	0.99468	0.0535698	0.97748	0.804966	3.88733e-06	1.07518	4.45969e-07	0.0455787	0.872877	-0.0353248	0.953636	-0.00978695	0.990464	-0.259761	0.668866	-0.0155873	0.957265	-0.130176	0.581626	-0.120193	0.846134
848000144	Sphingomyelins	SM(d40:1)	-0.133673	0.903018	0.0208285	0.99468	-0.0287761	0.97748	0.469378	0.00128254	0.556039	0.000184638	0.107713	0.552728	-0.0335719	0.960279	-0.113512	0.9853	-0.190131	0.714828	0.0677282	0.8199	-0.0435712	0.839526	-0.142416	0.724642
848000145	Sphingomyelins	SM(d41:2)	-0.0992712	0.927681	0.0293141	0.99468	0.0154986	0.97748	0.702061	5.54341e-05	0.929369	1.69066e-06	0.0592737	0.813789	-0.0923127	0.923991	-0.0553521	0.9853	-0.24184	0.634077	-0.144745	0.665319	-0.252922	0.295918	-0.156595	0.724642
848000146	Sphingomyelins	SM(d41:1)	-0.111034	0.927681	-0.00322953	0.99468	-0.0110421	0.97748	0.477985	0.000703914	0.625818	1.64318e-05	0.125578	0.515433	-0.117374	0.792803	-0.0275387	0.986248	-0.146325	0.831999	-0.0458195	0.885165	-0.147514	0.426815	-0.17178	0.691636
848000147	Sphingomyelins	SM(d42:2)	-0.175262	0.870185	0.0699304	0.99468	-0.0510019	0.97748	0.307255	0.00169612	0.463637	0.000876566	0.0191592	0.944641	-0.0713396	0.915537	-0.0331296	0.9853	-0.206051	0.78187	0.158302	0.25093	0.0845763	0.7671	-0.182887	0.652958
848000148	Sphingomyelins	SM(d42:1)	-0.208076	0.870185	0.0403309	0.99468	0.0550281	0.97748	0.417739	0.000130942	0.573862	0.000214776	0.112732	0.547047	-0.0923494	0.827156	0.0222357	0.986248	-0.0810503	0.862892	0.0652181	0.790581	0.04386	0.868092	-0.139108	0.802183
848000151	Sphingomyelins	SM(d18:1/C24:1)	0.0743289	0.999815	-0.844622	0.99468	-0.929178	0.706516	0.0976803	0.813934	-0.801653	0.04772	-0.868346	0.088462	0.116378	0.960279	-0.756872	0.9853	-0.273771	0.831999	0.165153	0.885165	-0.204648	0.823199	-0.39538	0.724642
848000190	Triglycerides	TG(16:0_16:1)	-0.49894	0.98371	0.776087	0.99468	0.753117	0.97748	-1.53854	0.16402	0.581693	0.630022	-0.138812	0.944641	-0.678091	0.899026	0.480664	0.9853	0.817247	0.885633	-0.394278	0.876655	-0.54914	0.716568	0.644458	0.952102
848000191	Triglycerides	TG(16:0_18:2)	0.0372861	0.999815	-0.188117	0.99468	-0.259177	0.97748	-0.49445	0.0349573	-0.838353	0.000485633	-0.0500997	0.940781	-0.0423289	0.963424	-0.0971184	0.9853	0.0453199	0.966935	0.0875786	0.885197	-0.068958	0.905627	-0.0413502	0.974375
848000192	Triglycerides	TG(18:2_18:3)	0.0359173	0.999815	-0.057327	0.99468	0.218049	0.97748	-0.68503	0.00013502	-0.479877	0.0518238	0.0791132	0.870578	-0.520486	0.373225	-0.228696	0.9853	0.417439	0.78187	-0.33574	0.469656	0.0671816	0.915398	0.224886	0.901141
848000193	Triglycerides	TG(18:2_18:2)	-0.0493069	0.999815	-0.0519709	0.99468	-0.250519	0.97748	-0.446011	0.066513	-0.638286	0.0288965	-0.272974	0.642362	-0.20374	0.726844	-0.113218	0.9853	-0.153628	0.943181	0.174609	0.715667	-0.0974272	0.839526	-0.114128	0.962035
848000195	Triglycerides	TG(18:1_18:2)	-0.248598	0.903018	-0.271668	0.99468	-0.0569514	0.97748	-0.762458	0.00211491	-0.936585	0.000966111	-0.534514	0.135444	-0.365684	0.550099	-0.193933	0.9853	-0.184548	0.885633	-0.359887	0.385747	0.0606004	0.899991	-0.296814	0.765747
848000196	Triglycerides	TG(30:0_18:2)	0.0871938	0.948606	-0.0293968	0.99468	-0.16206	0.97748	-0.297256	0.0142262	-0.348567	0.0317735	-0.293776	0.440329	-0.0682194	0.934924	-0.215526	0.9853	-0.169849	0.862892	-0.147315	0.652607	-0.139947	0.591569	-0.0607215	0.971543
848000197	Triglycerides	TG(32:1_16:1)	0.185672	0.903018	-0.309731	0.99468	-0.422443	0.97748	0.162057	0.0540485	-0.149325	0.621405	-0.158764	0.741913	-0.0630813	0.803265	-0.209547	0.9853	-0.353373	0.722087	-0.13974	0.348313	-0.249809	0.574335	-0.212742	0.846134
848000198	Triglycerides	TG(30:0_18:1)	0.184468	0.870185	-0.169163	0.99468	-0.269835	0.97748	-0.137346	0.214814	-0.34689	0.0140274	-0.171805	0.668971	-0.0353638	0.953636	-0.210454	0.9853	-0.177101	0.848092	-0.106175	0.706648	-0.23936	0.271328	-0.128248	0.93212
848000199	Triglycerides	TG(32:0_16:1)	0.215964	0.903018	-0.11546	0.99468	-0.346616	0.97748	-0.291697	0.0472165	-0.458851	0.0375264	-0.117544	0.860811	-0.318651	0.373225	-0.208734	0.9853	-0.219885	0.862892	-0.279284	0.469656	-0.262093	0.426815	-0.0290961	0.974375
848000200	Triglycerides	TG(32:0_16:0)	-0.0417436	0.999815	0.00395225	0.99468	-0.157282	0.97748	-0.903906	1.82092e-05	-1.03599	3.70194e-05	-0.130116	0.827789	-0.280614	0.538866	-0.344684	0.9853	0.0745941	0.966935	-0.445419	0.4124	-0.546734	0.0642951	0.134589	0.952102
848000201	Triglycerides	TG(34:1_16:0)	-0.00379163	0.999815	-0.0700358	0.99468	-0.15129	0.97748	-0.537869	0.00088434	-0.616219	0.00188829	-0.017966	0.96197	-0.24577	0.453199	-0.124682	0.9853	-0.0964795	0.966935	-0.198284	0.588086	-0.109402	0.744596	-0.033843	0.974375
848000202	Triglycerides	TG(34:0_16:0)	-0.0935421	0.992298	0.0867426	0.99468	-0.127092	0.97748	-1.07964	1.95385e-05	-1.08371	0.000259319	-0.082585	0.925027	-0.504108	0.373225	-0.288463	0.9853	0.00381724	0.992993	-0.512737	0.385747	-0.498639	0.237	0.0904455	0.971543
848000204	Triglycerides	TG(36:5_16:0)	0.0143547	0.999815	-0.174019	0.99468	-0.0138023	0.97748	-0.739941	0.000135913	-0.7619	0.000526205	-0.0408383	0.944641	-0.301998	0.522246	-0.227879	0.9853	0.00309794	0.992993	-0.382342	0.191017	-0.0878085	0.819465	-0.0326835	0.974375
848000205	Triglycerides	TG(34:1_18:3)	0.016657	0.999815	-0.176598	0.99468	-0.138575	0.97748	-0.586777	5.13065e-05	-0.668821	0.000726897	-0.155142	0.639867	-0.201468	0.566134	-0.285571	0.9853	-0.045031	0.966935	-0.264972	0.213354	-0.0556532	0.863015	0.0325627	0.974375
848000206	Triglycerides	TG(36:4_16:0)	0.0129664	0.999815	-0.079957	0.99468	-0.0352655	0.97748	-0.726676	3.88733e-06	-0.754466	0.000299193	-0.167545	0.590366	-0.203305	0.562317	-0.214244	0.9853	0.058716	0.966935	-0.0810606	0.798593	0.129507	0.663059	0.0110708	0.974375
848000207	Triglycerides	TG(34:2_18:1)	0.0115205	0.999815	0.00525558	0.99468	-0.134097	0.97748	-0.657473	3.92821e-05	-0.608113	0.000233819	-0.0287767	0.944641	-0.195622	0.538866	-0.0765849	0.9853	-0.0701914	0.966935	-0.162651	0.601957	0.200163	0.273429	-0.118042	0.901141
848000208	Triglycerides	TG(34:2_18:0)	0.128807	0.927681	-0.0408714	0.99468	-0.116215	0.97748	-0.426185	0.00132847	-0.612189	0.000589514	-0.123538	0.770366	-0.00193147	0.997584	-0.197975	0.9853	-0.012289	0.992993	0.00861684	0.975681	-0.177193	0.515085	0.0555893	0.971543
848000209	Triglycerides	TG(34:1_18:1)	-0.0221771	0.999815	-0.0602987	0.99468	-0.0809043	0.97748	-0.482347	0.00220133	-0.589838	0.0012421	-0.0660604	0.829072	-0.159125	0.564061	-0.0484256	0.9853	-0.0418516	0.966935	-0.0933513	0.688703	0.0628713	0.79547	-0.0754063	0.952102
848000210	Triglycerides	TG(34:0_18:1)	-0.0760767	0.98371	-0.227682	0.99468	-0.227217	0.97748	-0.539587	0.00482786	-0.739323	0.00448417	0.0492803	0.944641	-0.198448	0.699461	-0.302423	0.9853	-0.157217	0.90167	-0.159489	0.727361	-0.208535	0.64241	-0.0206827	0.974375
848000211	Triglycerides	TG(34:0_18:0)	0.0278468	0.999815	-0.0042339	0.99468	0.100924	0.97748	-0.875222	0.00224638	-1.20732	4.37034e-05	-0.202817	0.775233	-0.175417	0.899026	-0.22174	0.9853	0.0984293	0.966935	-0.333011	0.641724	-0.435229	0.310373	0.13374	0.952102
848000212	Triglycerides	TG(36:4_18:2)	-0.183166	0.870185	0.0097541	0.99468	0.160108	0.97748	-0.680498	2.55855e-06	-0.398429	0.000732038	0.0989264	0.607938	-0.171816	0.546182	0.0091244	0.990464	0.120582	0.831999	0.0729837	0.716687	0.539551	0.00278396	0.0868485	0.93212
848000213	Triglycerides	TG(36:3_18:3)	-0.106703	0.927681	-0.131896	0.99468	0.0105908	0.97748	-0.624052	0.00035002	-0.42608	0.00556462	0.0899536	0.781349	-0.235251	0.550099	-0.109463	0.9853	0.00125078	0.992993	-0.14233	0.665319	0.433201	0.0375768	0.0254804	0.974375
848000214	Triglycerides	TG(36:3_18:2)	-0.238221	0.870185	-0.0634919	0.99468	0.0814458	0.97748	-0.885936	2.99835e-07	-0.732835	3.24184e-05	0.0759406	0.820466	-0.248643	0.469919	-0.0260242	0.986248	0.0736265	0.966935	-0.00849559	0.961239	0.54109	0.00996479	0.128484	0.93212
848000215	Triglycerides	TG(36:4_18:0)	-0.0761521	0.948606	0.0479425	0.99468	0.100375	0.97748	-0.62438	2.99835e-07	-0.504273	0.000966111	0.0750708	0.724517	-0.0394384	0.943209	-0.00906541	0.990464	0.0908531	0.831999	0.0420139	0.870459	0.176497	0.435752	0.0623594	0.901141
848000216	Triglycerides	TG(36:3_18:1)	-0.139433	0.903018	-0.0530062	0.99468	0.0344071	0.97748	-0.866798	3.88733e-06	-0.769108	0.000263401	0.117484	0.770366	-0.224417	0.456598	-0.0022794	0.99492	0.0119431	0.992993	0.014657	0.958605	0.612867	0.0250789	0.0412269	0.974375
848000217	Triglycerides	TG(36:2_18:1)	-0.021776	0.999815	-0.231665	0.99468	-0.09992	0.97748	-0.783802	5.85603e-05	-0.790102	0.000245971	0.152796	0.770366	-0.208652	0.550099	-0.0630195	0.9853	-0.173932	0.90167	-0.00839407	0.971626	0.428655	0.130989	-0.0707024	0.971543
848000218	Triglycerides	TG(36:1_18:2)	-0.103888	0.903018	-0.0812982	0.99468	-0.0824169	0.97748	-0.766312	2.69147e-05	-0.666287	0.00103719	0.19265	0.607938	-0.276424	0.456122	-0.116082	0.9853	0.0268299	0.973027	-0.00288177	0.985478	0.267185	0.380893	-0.0509403	0.971543
848000219	Triglycerides	TG(36:1_18:1)	0.0158354	0.999815	-0.265592	0.99468	-0.224825	0.97748	-0.623624	0.00171285	-0.787475	0.0016837	0.379349	0.500644	-0.194108	0.699461	-0.124753	0.9853	-0.188313	0.862892	0.0534015	0.911784	0.102518	0.839526	-0.0913561	0.971543
848000220	Triglycerides	TG(36:1_18:0)	-0.180116	0.968388	-0.386117	0.99468	0.0642533	0.97748	-0.791969	0.0103424	-1.19077	0.000369263	0.204905	0.775233	-0.254874	0.838848	-0.356874	0.9853	-0.106238	0.966935	-0.26359	0.715667	-0.362575	0.488083	0.0913127	0.971543
848000221	Triglycerides	TG(36:0_18:0)	-0.00850732	0.999815	-0.06635	0.99468	0.13227	0.97748	-0.637227	0.00847871	-0.77844	0.00419854	0.0315736	0.944641	-0.241315	0.66554	-0.256262	0.9853	0.0108728	0.992993	-0.283683	0.577113	-0.426381	0.271814	0.0492372	0.971543
848000223	Triglycerides	TG(16:0_18:1_18:3)	0.00567569	0.999815	0.316429	0.99468	-0.350985	0.97748	-0.498999	0.0499402	-0.374037	0.0264604	-0.187471	0.770366	-0.0671828	0.960279	0.23893	0.9853	-0.187933	0.949966	0.0546084	0.944724	0.385793	0.231905	-0.176196	0.952102
848000224	Triglycerides	TG(18:1_18:2_18:3)	-0.0201491	0.999815	-0.12157	0.99468	-0.0499568	0.97748	-0.0557871	0.705059	-0.364233	0.00914532	-0.121815	0.526101	-0.0306909	0.963424	-0.111789	0.9853	-0.049565	0.966935	0.0771698	0.759902	-0.0684749	0.819465	0.0656778	0.952102
828000099	Unknown	Unknown lipid (828000099)	-0.0905586	0.98371	-0.137334	0.99468	0.344571	0.97748	0.351304	0.0683692	0.418039	0.026577	0.421482	0.263608	0.089337	0.953636	0.0407069	0.986248	0.096416	0.885633	0.0230096	0.960054	0.399187	0.049669	-0.0086246	0.974375
828000445	Unknown	Unknown lipid (828000445)	-0.0564434	0.980472	0.0706716	0.99468	0.0114125	0.981348	-0.28025	0.0602071	-0.0852642	0.621951	-0.187308	0.518969	0.0238085	0.963424	0.00201369	0.994671	-0.0286197	0.966935	-0.227411	0.326061	-0.123584	0.566902	-0.127785	0.901141
828000473	Unknown	Unknown lipid (828000473)	-0.211029	0.903018	-0.0230652	0.99468	0.281403	0.97748	0.127703	0.572784	0.412675	0.027963	0.0602941	0.872877	0.179447	0.747189	0.0481869	0.9853	0.0164649	0.974857	-0.359556	0.230068	-0.0980951	0.7671	-0.139287	0.846134
828000498	Unknown	Unknown lipid (828000498)	-0.0320312	0.999815	-0.286109	0.99468	0.156577	0.97748	0.15887	0.470981	-0.0760756	0.720704	-0.179881	0.597794	-0.0829258	0.940487	-0.18392	0.9853	-0.320022	0.831999	0.0227636	0.957265	-0.213366	0.519575	0.0365007	0.974375
838000389	Unknown	Unknown polar (838000389)	0.180546	0.870185	-0.0741683	0.99468	-0.0325756	0.97748	0.0645581	0.675218	-0.152977	0.107716	-0.0616906	0.833623	0.0529235	0.947261	0.157994	0.9853	-0.114223	0.862892	0.0600283	0.875847	-0.0179747	0.95036	0.0498329	0.971543
838000428	Unknown	Unknown polar (838000428)	0.0255993	0.999815	-0.00406166	0.99468	0.0871199	0.97748	0.0399147	0.760615	0.066476	0.448813	0.015216	0.944641	-0.0188771	0.963424	0.0188687	0.986248	0.0863732	0.862892	0.118541	0.613626	-0.0802275	0.651293	0.0446203	0.971543
838000430	Unknown	Unknown polar (838000430)	-0.0146862	0.999815	0.033484	0.99468	-0.0684391	0.97748	0.0486921	0.708901	-0.00553942	0.966299	0.0110329	0.944641	-0.00395322	0.990913	-0.0277513	0.986248	-0.00704498	0.992993	0.0614963	0.791748	-0.107036	0.396049	0.0864094	0.846134
838000433	Unknown	Unknown polar (838000433)	-0.0550162	0.999815	0.0667801	0.99468	0.0498187	0.97748	-0.0847723	0.745734	-0.107144	0.572988	0.0321252	0.944641	0.0075307	0.990913	-0.202501	0.9853	0.120487	0.862892	0.141876	0.759691	-0.246234	0.380893	0.086369	0.952102
838000449	Unknown	Unknown polar (838000449)	0.105015	0.924686	0.0218074	0.99468	-0.0772158	0.97748	0.0527691	0.703749	-0.0581157	0.736868	-0.172378	0.51594	0.0348963	0.953636	0.0226181	0.986248	-0.0839289	0.934217	-0.159931	0.433143	-0.100898	0.696271	-0.0216025	0.974375
848000042	Unknown	Unknown lipid (848000042)	-0.139069	0.903018	0.171714	0.99468	-0.173221	0.97748	-0.152835	0.342199	-0.0248019	0.876747	-0.15631	0.448086	-0.152327	0.66554	-0.0564728	0.9853	-0.0612834	0.951833	0.0951316	0.816229	-0.0291057	0.941061	0.105472	0.846134
848000043	Unknown	Unknown lipid (848000043)	-0.526211	0.903018	-1.03771	0.99468	-0.287411	0.97748	-0.754532	0.119156	-0.781087	0.0765114	0.111994	0.820466	0.098008	0.963424	-0.174442	0.9853	-0.165325	0.90167	-0.444803	0.588627	-0.421281	0.54704	-0.0400066	0.974375
848000044	Unknown	Unknown lipid (848000044)	0.129267	0.992298	-0.126327	0.99468	-0.0694075	0.97748	-0.285667	0.586821	0.215136	0.630022	0.39688	0.591425	-0.24953	0.915537	-0.268798	0.9853	-0.0437072	0.976157	0.470395	0.584308	-0.428631	0.49609	0.189439	0.954886
848000046	Unknown	Unknown lipid (848000046)	-0.0949158	0.891424	-0.0415504	0.99468	0.0165388	0.97748	-0.172003	0.0192638	-0.199457	0.0256252	0.0561847	0.591425	-0.0209298	0.953636	-0.0402903	0.9853	-0.114027	0.695778	-0.0602048	0.759691	-0.131076	0.333658	-0.0368344	0.952102
848000089	Unknown	Unknown lipid (848000089)	0.145147	0.892891	0.0259294	0.99468	-0.0044734	0.987223	0.00117127	0.994511	0.0311985	0.837726	0.0240028	0.938951	-0.0620818	0.934924	0.00587778	0.990464	-0.101632	0.831999	-0.0585051	0.759691	0.0385026	0.866997	-0.230547	0.425606
848000127	Unknown	Unknown lipid (848000127)	-0.135436	0.777722	0.149979	0.99468	0.0448039	0.97748	-0.385358	0.000106423	-0.276371	0.0030942	0.134249	0.226282	-0.0387115	0.940487	0.104447	0.9853	-0.0276915	0.966935	-0.0423165	0.835374	0.148956	0.269741	-0.00225839	0.980736
848000189	Unknown	Unknown lipid (848000189)	0.178268	0.927681	0.0528335	0.99468	-0.239009	0.97748	-0.43923	0.0478526	-0.551742	0.0192558	-0.0778133	0.938951	0.000368627	0.998868	-0.113999	0.9853	0.0116991	0.992993	-0.232172	0.643551	0.148288	0.79547	0.0401038	0.974375
848000222	Unknown	Unknown lipid (848000222)	0.0764548	0.948606	-0.278197	0.99468	-0.13554	0.97748	-0.146977	0.240278	-0.420747	0.0149187	-0.116414	0.583482	-0.1309	0.66554	-0.147987	0.9853	-0.0426624	0.966935	-0.039808	0.907436	-0.260126	0.230151	0.0673972	0.952335
848000225	Unknown	Unknown lipid (848000225)	0.0394667	0.992298	-0.0647298	0.99468	0.0142823	0.97748	-0.607198	0.000109819	-0.700986	0.000299193	0.157471	0.724474	-0.196353	0.555003	-0.0551274	0.9853	0.0453677	0.966935	-0.0242077	0.950465	0.30357	0.265396	-0.0127765	0.974375
858000010	Unknown	Unknown lipid (858000010)	-0.0622542	0.903018	0.119087	0.99468	-0.0321954	0.97748	-0.00399539	0.967572	0.124358	0.208599	-0.0960126	0.324037	-0.0238544	0.940487	0.138771	0.9853	-0.0799055	0.831999	0.0106461	0.94885	0.0888371	0.607552	-0.0320486	0.952102
858000013	Unknown	Unknown lipid (858000013)	0.0220037	0.999815	0.0135513	0.99468	-0.0718627	0.97748	-0.0750371	0.390089	-0.337068	0.000299193	-0.208496	0.22713	0.110631	0.538866	0.0739009	0.9853	0.105216	0.831999	0.0359214	0.816229	-0.0173072	0.941061	0.0688683	0.93212
858000019	Unknown	Unknown lipid (858000019)	-0.0469987	0.903018	-0.0013132	0.99468	-0.00849088	0.97748	-0.0668621	0.390089	-0.11117	0.102304	-0.0729099	0.533072	0.00804903	0.963424	-0.00332887	0.990464	-0.0363427	0.949966	-0.00749811	0.950465	-0.120794	0.380893	0.0397539	0.952102
858000020	Unknown	Unknown lipid (858000020)	-0.0540726	0.927681	-0.00147874	0.99468	-0.011853	0.97748	0.00986353	0.9314	-0.0515405	0.581847	-0.0633643	0.60882	0.038718	0.940487	-0.00242056	0.990464	-0.0752224	0.831999	0.0508625	0.737711	-0.040241	0.839526	0.0259486	0.971543
858000033	Unknown	Unknown lipid (858000033)	0.0216377	0.999815	-0.037772	0.99468	0.0771974	0.97748	0.238491	0.345527	0.266894	0.00924454	-0.0329125	0.874096	0.0639237	0.953636	0.132804	0.9853	-0.00265957	0.992993	0.669123	0.191017	0.258889	0.0250789	0.0548811	0.952102
858000034	Unknown	Unknown lipid (858000034)	0.0507518	0.977786	-0.0136501	0.99468	0.00105412	0.996583	0.31678	0.00186985	0.377873	0.00227589	0.0809854	0.62895	0.140468	0.555003	0.00460021	0.990464	0.00216857	0.992993	0.0611652	0.727589	-0.0743884	0.435405	0.00721152	0.974375
858000038	Unknown	Unknown lipid (858000038)	-0.109202	0.980472	-0.244534	0.99468	-0.108401	0.97748	0.359732	0.0740688	0.21629	0.535677	-0.277405	0.529154	0.118182	0.899026	-0.284263	0.9853	-0.346753	0.78187	0.153993	0.688703	0.476661	0.233635	-0.179718	0.926222
858000042	Unknown	Unknown lipid (858000042)	-0.132176	0.999815	-0.405096	0.99468	0.977231	0.97748	-0.21657	0.756212	-0.279577	0.714315	1.76809	0.088462	0.154102	0.960279	-0.340439	0.9853	0.594798	0.78187	0.580413	0.683357	-0.668211	0.597278	0.920868	0.429592
858000047	Unknown	Unknown lipid (858000047)	-0.621769	0.870185	0.0669384	0.99468	0.376678	0.97748	0.115636	0.826779	0.524519	0.0813566	1.3792	0.145168	0.295934	0.934924	-0.175232	0.9853	0.549323	0.571517	0.0925742	0.950465	-0.323624	0.427134	0.493882	0.6062
858000056	Unknown	Unknown lipid (858000056)	0.0295672	0.98371	0.0363939	0.99468	0.0128394	0.97748	0.0308441	0.756212	-0.102594	0.0859133	-0.132883	0.226282	0.0512207	0.899026	0.00838096	0.986248	0.0612237	0.885633	0.00924749	0.957265	-0.117208	0.329093	-0.0188056	0.971543
858000064	Unknown	Unknown lipid (858000064)	-0.0251867	0.999815	-0.104764	0.99468	0.0789861	0.97748	0.297571	0.348491	0.0570155	0.771343	-0.0352414	0.925027	-0.126451	0.938623	0.0183997	0.986248	-0.0852584	0.936062	0.284198	0.609039	0.0162589	0.95036	-0.0775767	0.952102
858000065	Unknown	Unknown lipid (858000065)	-0.0203056	0.999815	-0.0161883	0.99468	-0.0959389	0.97748	0.279012	0.212938	0.168961	0.0134994	0.08804	0.552728	0.0441396	0.960279	-0.0190803	0.986248	0.114009	0.798853	-0.121309	0.696453	0.0461748	0.819465	-0.0406485	0.952102
858000068	Unknown	Unknown lipid (858000068)	0.0884425	0.999815	-0.256193	0.99468	0.666699	0.706516	0.0980492	0.814142	-0.0402796	0.937668	1.39214	0.0721164	0.0502855	0.969559	0.0579291	0.986248	0.402247	0.831999	0.259255	0.750643	0.0203506	0.988568	1.16296	0.329023
858000071	Unknown	Unknown lipid (858000071)	0.00400689	0.999815	-0.00298606	0.99468	0.0765267	0.97748	0.362615	0.000121422	0.36185	2.05516e-07	0.13024	0.345733	0.0465766	0.805334	-0.00621982	0.986248	0.0411703	0.885633	0.138084	0.223639	0.232599	0.0135694	0.0491351	0.8763
878000058	Unknown	Unknown polar (878000058)	-0.0736949	0.980472	-0.127547	0.99468	-0.102627	0.97748	0.145283	0.289438	-0.110296	0.370995	0.0168165	0.944641	-0.0535745	0.934924	0.0913737	0.9853	-0.0732135	0.90167	0.0820451	0.715667	-0.332994	0.0749898	0.156441	0.799581
878000063	Unknown	Unknown polar (878000063)	-0.00903642	0.999815	-0.0209546	0.99468	0.0312231	0.97748	-0.153339	0.0454148	-0.155829	0.125518	0.0199181	0.925027	0.0268354	0.934924	0.0068924	0.990464	0.0146796	0.966935	-0.228246	0.20093	-0.346019	0.0317557	0.0928124	0.639813
878000070	Unknown	Unknown polar (878000070)	-0.547562	0.927681	-0.308909	0.99468	0.000551647	0.999228	-0.819232	0.273063	-0.135488	0.837726	-0.523849	0.60882	-0.0993865	0.963424	-0.355663	0.9853	0.0847523	0.972547	-0.354163	0.823115	-0.0758345	0.95036	-0.230906	0.971543
878000071	Unknown	Unknown polar (878000071)	-0.00598145	0.999815	0.0708288	0.99468	0.113607	0.97748	0.299093	0.000840996	0.399716	1.01704e-05	0.0970902	0.500644	-0.0216328	0.953636	0.0734873	0.9853	0.0812895	0.831999	0.104459	0.567433	0.333028	0.00564746	0.11481	0.6062
878000074	Unknown	Unknown polar (878000074)	0.187724	0.948606	-0.0951595	0.99468	0.39721	0.97748	0.36044	0.320524	-0.781439	0.043678	-0.207878	0.615814	0.392147	0.627442	0.0798602	0.986248	0.208238	0.885633	-0.398694	0.213354	0.0226101	0.972946	0.0871883	0.971543
838000083	Vitamins and Cofactors	Threonic acid	0.259391	0.903018	-0.0522985	0.99468	0.130143	0.97748	-0.354672	0.227313	-0.966414	9.09601e-05	-0.237947	0.630286	0.233088	0.581105	0.0621845	0.9853	-0.0953328	0.966935	0.683388	0.0199139	0.333069	0.12693	0.217441	0.857607
838000159	Vitamins and Cofactors	Ascorbic acid	0.118864	0.870185	-0.0221727	0.99468	0.0108882	0.97748	0.00895463	0.951654	-0.00317831	0.983598	-0.0501008	0.852281	0.0990133	0.792803	0.0614899	0.9853	-0.0402276	0.966935	0.107127	0.631494	0.101078	0.547158	-0.098151	0.93212
848000025	Vitamins and Cofactors	Coenzyme Q6	0.224057	0.903018	-0.0107589	0.99468	-0.0415894	0.97748	-0.265157	0.257697	-0.185652	0.272761	0.349751	0.170516	0.0345957	0.963424	-0.206358	0.9853	-0.153908	0.831999	-0.156291	0.762779	-0.490369	0.129521	0.0555687	0.953701
848000026	Vitamins and Cofactors	Coenzyme Q7	0.144694	0.903018	0.157604	0.99468	-0.0908036	0.97748	0.00388978	0.98798	-0.0539247	0.798994	0.218112	0.484112	0.130666	0.848858	-0.0397415	0.986248	0.059343	0.966935	-0.0688183	0.871374	-0.34143	0.303494	0.0462746	0.971543
848000027	Vitamins and Cofactors	Coenzyme Q9	0.0601813	0.98371	-0.00229823	0.99468	-0.0593249	0.97748	-0.210288	0.189438	-0.161995	0.401399	0.233704	0.547047	-0.0877913	0.929865	-0.284297	0.9853	0.0510606	0.966935	-0.251205	0.517615	-0.387489	0.149638	-0.0755394	0.954886
848000028	Vitamins and Cofactors	Coenzyme Q10	0.0738763	0.98371	-0.0642511	0.99468	0.0219203	0.97748	-0.48143	0.0195044	-0.377794	0.0386073	0.0823668	0.847538	-0.0508252	0.953636	-0.227096	0.9853	0.0374378	0.968802	-0.377427	0.327576	-0.541561	0.0642951	-0.100362	0.952102
848000034	Vitamins and Cofactors	alpha-Tocopherol	-0.122299	0.903018	0.000241649	0.998485	-0.117788	0.97748	0.289613	0.0404599	0.354333	0.0206259	-0.060224	0.770366	-0.0193022	0.963424	-0.0309026	0.986248	-0.154698	0.78187	-0.0180386	0.950465	-0.131931	0.630107	-0.281294	0.362109
868000002	Vitamins and Cofactors	Choline	-0.0764397	0.903018	0.0172683	0.99468	-0.0126363	0.97748	0.0787171	0.388936	0.0569269	0.43131	0.0367313	0.82468	0.072788	0.777777	0.0324042	0.9853	0.0673595	0.831999	-0.123198	0.384039	-0.0653036	0.477335	0.0501148	0.901141
868000008	Vitamins and Cofactors	Nicotinamide	0.344887	0.870185	0.369808	0.99468	-0.123864	0.97748	0.295884	0.278022	-0.175045	0.155875	-0.326844	0.236012	0.36647	0.554315	0.0911387	0.9853	-0.0532466	0.966935	0.719429	0.0817245	0.0848768	0.825363	-0.103614	0.952102
868000027	Vitamins and Cofactors	Pyridoxal	-0.181593	0.870185	0.0299941	0.99468	-0.0122844	0.97748	-0.601121	1.7744e-05	-0.424965	0.000102299	-0.162654	0.500644	-0.0469809	0.940487	0.0262787	0.986248	0.00600894	0.992993	-0.346557	0.0199139	-0.258987	0.09799	-0.0122943	0.974375
868000028	Vitamins and Cofactors	Pyridoxamine	0.0830723	0.98371	-0.0187655	0.99468	0.139827	0.97748	0.142361	0.447167	0.0269474	0.8814	0.0719585	0.832625	0.191936	0.66554	0.0945983	0.9853	0.0606165	0.966935	0.132916	0.665319	-0.286717	0.492159	0.163483	0.778701
868000055	Vitamins and Cofactors	5,6,7,8-Tetrahydrobiopterin	0.0183334	0.999815	-0.223042	0.99468	-0.0847239	0.97748	-0.405846	0.117049	-0.662425	0.00278705	-0.133258	0.770366	-0.08699	0.952662	0.107916	0.9853	-0.165662	0.90167	-0.199843	0.652607	-0.328461	0.354349	-0.187757	0.952102
868000061	Vitamins and Cofactors	Thiamine	-0.0288752	0.992298	-0.114775	0.99468	-0.110223	0.97748	0.0953869	0.334039	-0.0910907	0.180054	-0.16717	0.397658	0.142005	0.555003	-0.0268866	0.9853	-0.115737	0.831999	0.0548587	0.715667	-0.0588509	0.771428	0.140215	0.652958
878000015	Vitamins and Cofactors	Pantothenic acid	0.129951	0.903018	0.212649	0.99468	0.0814253	0.97748	-0.364752	0.0076915	-0.358123	0.0144258	-0.227085	0.145427	0.144672	0.66554	0.0856938	0.9853	0.0992005	0.831999	0.136775	0.657805	-0.0395726	0.901932	0.0687773	0.941869
878000019	Vitamins and Cofactors	Biotin	-0.335871	0.977786	-0.0167848	0.99468	0.115369	0.97748	-0.594446	0.350859	-0.236632	0.670934	0.052253	0.944641	-0.440457	0.805334	0.384415	0.9853	-0.158653	0.966935	0.13382	0.911784	-0.0154427	0.988568	-0.292755	0.857496
